# Supplementary material
Source: publisher figshare collection journal article supplement (https://acs.figshare.com/ndownloader/files/9500734)
Supplement: Supplementary file 1 [file 9500734]

## Sheet: HILIC
HILIC: glycopeptides of human serum were enriched by ZIC-HILIC and analyzed by LC-MS/MS. GPQuest was used to identify the intact glycopeptides.
MS1 Scan Number	MS2 Scan Number	Retention Time (mins)	Peptide Sequence	RafSeq accession number	Candidate Glycan Exact Mass	Candidate Glycan Composition	Precursor Mz	Precursor Mass	Precursor Charge	Mass Shift	PSM Score Morpheus	Matching Error in ppm	Glycosylation type annotation
26484	26491	86.9058	AALAAFNAQNNGSNFQLEEISR	gi|156523970	2204.77	N4H5F0S2G0	1143.74	4569.91	4	-2	12.2116	-3.4608	N-linked glycosylation
23884	23896	79.6908	AALAAFNAQNNGSNFQLEEISR	gi|156523970	1914.7	N4H5F2S0G0	1071.46	4279.81	4	-3	10.192	-9.773	N-linked glycosylation
22142	22145	74.8282	AALAAFNAQNNGSNFQLEEISR	gi|156523970	1913.68	N4H5F0S1G0	1070.96	4278.83	4	-2	9.2618	-0.80013	N-linked glycosylation
23676	23681	79.0957	AALAAFNAQNNGSNFQLEEISR	gi|156523970	1914.7	N4H5F2S0G0	1070.96	4279.81	4	-1	9.2168	-8.4334	N-linked glycosylation
22181	22185	74.9392	AALAAFNAQNNGSNFQLEEISR	gi|156523970	1913.68	N4H5F0S1G0	1427.28	4278.83	3	-1	7.1878	-0.098732	N-linked glycosylation
18827	18835	65.6502	AALAAFNAQNNGSNFQLEEISR	gi|156523970	1622.58	N4H5F0S0G0	1330.58	3987.73	3	-2	6.1747	-1.8804	N-linked glycosylation
28187	28199	91.6608	AALAAFNAQNNGSNFQLEEISR	gi|156523970	2205.79	N4H5F2S1G0	1143.99	4570.92	4	-2	6.1297	-6.3207	N-linked glycosylation
14797	14803	54.4875	ADGTVNQIEGEATPVNLTEPAK	gi|4502163	1768.64	N4H5F1S0G0	1341.59	4022.75	3	0	8.1594	-1.8342	N-linked glycosylation
18060	18066	63.527	ADGTVNQIEGEATPVNLTEPAK	gi|4502163	2059.73	N4H5F1S1G0	1079.72	4313.85	4	-2	8.1142	-1.7269	N-linked glycosylation
33530	33533	106.628	ADTHDEILEGLNFNLTEIPEAQIHEGFQELLR	gi|189163528, gi|189163530, gi|189163532, gi|189163534, gi|189163536, gi|189163538, gi|189163540, gi|189163542, gi|50363217, gi|50363219, gi|50363221	1913.68	N4H5F0S1G0	1122.31	5605.51	5	-2	26.4036	0.74473	N-linked glycosylation
33647	33648	106.954	ADTHDEILEGLNFNLTEIPEAQIHEGFQELLR	gi|189163528, gi|189163530, gi|189163532, gi|189163534, gi|189163536, gi|189163538, gi|189163540, gi|189163542, gi|50363217, gi|50363219, gi|50363221	1913.68	N4H5F0S1G0	1402.88	5605.49	4	-3	23.4625	-2.1381	N-linked glycosylation
38637	38640	121.707	ADTHDEILEGLNFNLTEIPEAQIHEGFQELLR	gi|189163528, gi|189163530, gi|189163532, gi|189163534, gi|189163536, gi|189163538, gi|189163540, gi|189163542, gi|50363217, gi|50363219, gi|50363221	3007.06	N5H6F1S3G0	1341.39	6698.88	5	-4	23.3291	0.25329	N-linked glycosylation
31229	31230	100.163	ADTHDEILEGLNFNLTEIPEAQIHEGFQELLR	gi|189163528, gi|189163530, gi|189163532, gi|189163534, gi|189163536, gi|189163538, gi|189163540, gi|189163542, gi|50363217, gi|50363219, gi|50363221	1622.58	N4H5F0S0G0	1329.86	5314.4	4	-2	18.4855	-0.39467	N-linked glycosylation
33504	33506	106.553	ADTHDEILEGLNFNLTEIPEAQIHEGFQELLR	gi|189163528, gi|189163530, gi|189163532, gi|189163534, gi|189163536, gi|189163538, gi|189163540, gi|189163542, gi|50363217, gi|50363219, gi|50363221	2278.81	N5H6F0S1G0	1195.53	5970.63	5	-3	15.3416	-0.8846	N-linked glycosylation
38624	38629	121.675	ADTHDEILEGLNFNLTEIPEAQIHEGFQELLR	gi|189163528, gi|189163530, gi|189163532, gi|189163534, gi|189163536, gi|189163538, gi|189163540, gi|189163542, gi|50363217, gi|50363219, gi|50363221	2861	N5H6F0S3G0	1312.17	6552.82	5	-4	14.3025	-0.2754	N-linked glycosylation
33504	33505	106.55	ADTHDEILEGLNFNLTEIPEAQIHEGFQELLR	gi|189163528, gi|189163530, gi|189163532, gi|189163534, gi|189163536, gi|189163538, gi|189163540, gi|189163542, gi|50363217, gi|50363219, gi|50363221	2278.81	N5H6F0S1G0	1493.91	5970.63	4	-2	13.4105	-0.85218	N-linked glycosylation
36056	36057	113.806	ADTHDEILEGLNFNLTEIPEAQIHEGFQELLR	gi|189163528, gi|189163530, gi|189163532, gi|189163534, gi|189163536, gi|189163538, gi|189163540, gi|189163542, gi|50363217, gi|50363219, gi|50363221	2569.9	N5H6F0S2G0	1566.94	6261.73	4	-3	13.3999	0.8055	N-linked glycosylation
36186	36187	114.174	ADTHDEILEGLNFNLTEIPEAQIHEGFQELLR	gi|189163528, gi|189163530, gi|189163532, gi|189163534, gi|189163536, gi|189163538, gi|189163540, gi|189163542, gi|50363217, gi|50363219, gi|50363221	2204.77	N4H5F0S2G0	1475.66	5896.6	4	-3	12.4256	0.91712	N-linked glycosylation
35991	35992	113.622	ADTHDEILEGLNFNLTEIPEAQIHEGFQELLR	gi|189163528, gi|189163530, gi|189163532, gi|189163534, gi|189163536, gi|189163538, gi|189163540, gi|189163542, gi|50363217, gi|50363219, gi|50363221	2569.9	N5H6F0S2G0	1253.76	6261.73	5	-3	12.3565	0.74501	N-linked glycosylation
38637	38642	121.712	ADTHDEILEGLNFNLTEIPEAQIHEGFQELLR	gi|189163528, gi|189163530, gi|189163532, gi|189163534, gi|189163536, gi|189163538, gi|189163540, gi|189163542, gi|50363217, gi|50363219, gi|50363221	3007.06	N5H6F1S3G0	1676.23	6698.88	4	-3	11.3464	-1.0663	N-linked glycosylation
34011	34012	107.983	ADTHDEILEGLNFNLTEIPEAQIHEGFQELLR	gi|189163528, gi|189163530, gi|189163532, gi|189163534, gi|189163536, gi|189163538, gi|189163540, gi|189163542, gi|50363217, gi|50363219, gi|50363221	1913.68	N4H5F0S1G0	1402.88	5605.47	4	-3	11.3458	-5.6224	N-linked glycosylation
35874	35877	113.296	ADTHDEILEGLNFNLTEIPEAQIHEGFQELLR	gi|189163528, gi|189163530, gi|189163532, gi|189163534, gi|189163536, gi|189163538, gi|189163540, gi|189163542, gi|50363217, gi|50363219, gi|50363221	2569.9	N5H6F0S2G0	1567.19	6261.73	4	-4	10.4047	-0.58804	N-linked glycosylation
38624	38633	121.686	ADTHDEILEGLNFNLTEIPEAQIHEGFQELLR	gi|189163528, gi|189163530, gi|189163532, gi|189163534, gi|189163536, gi|189163538, gi|189163540, gi|189163542, gi|50363217, gi|50363219, gi|50363221	2861	N5H6F0S3G0	1639.71	6552.82	4	-3	10.3178	-0.74884	N-linked glycosylation
33712	33716	107.145	ADTHDEILEGLNFNLTEIPEAQIHEGFQELLR	gi|189163528, gi|189163530, gi|189163532, gi|189163534, gi|189163536, gi|189163538, gi|189163540, gi|189163542, gi|50363217, gi|50363219, gi|50363221	1913.68	N4H5F0S1G0	1122.31	5605.51	5	-2	10.2782	2.378	N-linked glycosylation
36198	36199	114.209	ADTHDEILEGLNFNLTEIPEAQIHEGFQELLR	gi|189163528, gi|189163530, gi|189163532, gi|189163534, gi|189163536, gi|189163538, gi|189163540, gi|189163542, gi|50363217, gi|50363219, gi|50363221	2204.77	N4H5F0S2G0	1180.73	5896.6	5	-3	10.2682	0.74938	N-linked glycosylation
33985	33995	107.933	ADTHDEILEGLNFNLTEIPEAQIHEGFQELLR	gi|189163528, gi|189163530, gi|189163532, gi|189163534, gi|189163536, gi|189163538, gi|189163540, gi|189163542, gi|50363217, gi|50363219, gi|50363221	1914.7	N4H5F2S0G0	1122.71	5606.51	5	-3	10.2659	-1.9465	N-linked glycosylation
35926	35928	113.441	ADTHDEILEGLNFNLTEIPEAQIHEGFQELLR	gi|189163528, gi|189163530, gi|189163532, gi|189163534, gi|189163536, gi|189163538, gi|189163540, gi|189163542, gi|50363217, gi|50363219, gi|50363221	2715.96	N5H6F1S2G0	1282.96	6407.78	5	-3	9.3485	-0.82108	N-linked glycosylation
35809	35812	113.112	ADTHDEILEGLNFNLTEIPEAQIHEGFQELLR	gi|189163528, gi|189163530, gi|189163532, gi|189163534, gi|189163536, gi|189163538, gi|189163540, gi|189163542, gi|50363217, gi|50363219, gi|50363221	2569.9	N5H6F0S2G0	1253.95	6261.72	5	-4	9.2763	-0.70701	N-linked glycosylation
38637	38643	121.715	ADTHDEILEGLNFNLTEIPEAQIHEGFQELLR	gi|189163528, gi|189163530, gi|189163532, gi|189163534, gi|189163536, gi|189163538, gi|189163540, gi|189163542, gi|50363217, gi|50363219, gi|50363221	3226.13	N6H7F0S3G0	1385	6917.96	5	-3	8.2745	0.030296	N-linked glycosylation
30956	30961	99.4075	ADTHDEILEGLNFNLTEIPEAQIHEGFQELLR	gi|189163528, gi|189163530, gi|189163532, gi|189163534, gi|189163536, gi|189163538, gi|189163540, gi|189163542, gi|50363217, gi|50363219, gi|50363221	1987.71	N5H6F0S0G0	1137.11	5679.52	5	-2	8.2592	-3.0148	N-linked glycosylation
33452	33459	106.419	ADTHDEILEGLNFNLTEIPEAQIHEGFQELLR	gi|189163528, gi|189163530, gi|189163532, gi|189163534, gi|189163536, gi|189163538, gi|189163540, gi|189163542, gi|50363217, gi|50363219, gi|50363221	1913.68	N4H5F0S1G0	1402.63	5605.48	4	-2	7.2938	-3.6302	N-linked glycosylation
33478	33482	106.485	ADTHDEILEGLNFNLTEIPEAQIHEGFQELLR	gi|189163528, gi|189163530, gi|189163532, gi|189163534, gi|189163536, gi|189163538, gi|189163540, gi|189163542, gi|50363217, gi|50363219, gi|50363221	2424.87	N5H6F1S1G0	1224.74	6116.68	5	-3	7.2027	-2.3865	N-linked glycosylation
35939	35940	113.475	ADTHDEILEGLNFNLTEIPEAQIHEGFQELLR	gi|189163528, gi|189163530, gi|189163532, gi|189163534, gi|189163536, gi|189163538, gi|189163540, gi|189163542, gi|50363217, gi|50363219, gi|50363221	2715.96	N5H6F1S2G0	1603.45	6407.78	4	-3	6.2397	-0.47622	N-linked glycosylation
33569	33576	106.749	ADTHDEILEGLNFNLTEIPEAQIHEGFQELLR	gi|189163528, gi|189163530, gi|189163532, gi|189163534, gi|189163536, gi|189163538, gi|189163540, gi|189163542, gi|50363217, gi|50363219, gi|50363221	1913.68	N4H5F0S1G0	935.42	5605.48	6	-2	6.1725	-4.4186	N-linked glycosylation
38663	38668	121.785	ADTHDEILEGLNFNLTEIPEAQIHEGFQELLR	gi|189163528, gi|189163530, gi|189163532, gi|189163534, gi|189163536, gi|189163538, gi|189163540, gi|189163542, gi|50363217, gi|50363219, gi|50363221	2861	N5H6F0S3G0	1639.96	6552.81	4	-4	6.1132	-1.6334	N-linked glycosylation
22779	22780	76.5947	ALPQPQNVTSLLGCTH	gi|11321561, gi|530395269	1913.68	N4H5F0S1G0	1217.53	3649.56	3	-1	16.2906	0.31159	N-linked glycosylation
27888	27889	90.8002	ALPQPQNVTSLLGCTH	gi|11321561, gi|530395269	2204.77	N4H5F0S2G0	1314.89	3940.65	3	-2	13.248	-0.021188	N-linked glycosylation
22623	22631	76.1788	ALPQPQNVTSLLGCTH	gi|11321561, gi|530395269	1913.68	N4H5F0S1G0	913.646	3649.55	4	-2	11.2273	-1.0459	N-linked glycosylation
18762	18764	65.4548	ALPQPQNVTSLLGCTH	gi|11321561, gi|530395269	1622.58	N4H5F0S0G0	1120.16	3358.46	3	0	10.2695	0.8111	N-linked glycosylation
27797	27805	90.566	ALPQPQNVTSLLGCTH	gi|11321561, gi|530395269	2222.81	N4H6F3S0G0	1320.23	3958.68	3	0	9.1925	-1.578	N-linked glycosylation
18567	18575	64.9345	ALPQPQNVTSLLGCTH	gi|11321561, gi|530395269	1622.58	N4H5F0S0G0	1120.49	3358.46	3	-1	8.2846	-0.4786	N-linked glycosylation
22961	22965	77.1092	ALPQPQNVTSLLGCTH	gi|11321561, gi|530395269	1913.68	N4H5F0S1G0	1217.19	3649.56	3	0	8.2295	0.59532	N-linked glycosylation
22584	22595	76.0785	ALPQPQNVTSLLGCTH	gi|11321561, gi|530395269	1913.68	N4H5F0S1G0	1218.53	3649.57	3	-4	8.2217	4.0762	N-linked glycosylation
18658	18663	65.1767	ALPQPQNVTSLLGCTH	gi|11321561, gi|530395269	1622.58	N4H5F0S0G0	1680.23	3358.46	2	-1	7.3352	-1.0928	N-linked glycosylation
38767	38775	122.083	AVNITSENLIDDVVSLIR	gi|4502511	2204.77	N4H5F0S2G0	1045.22	4175.85	4	-2	14.4363	0.60327	N-linked glycosylation
38767	38774	122.081	AVNITSENLIDDVVSLIR	gi|4502511	2205.79	N4H5F2S1G0	1393.29	4176.86	3	-1	11.3654	-2.8902	N-linked glycosylation
19022	19026	66.1783	CGLVPVLAENYNK	gi|4557871, gi|767927446	1913.68	N4H5F0S1G0	1131.15	3390.43	3	-1	5.4171	-0.70806	N-linked glycosylation
18294	18304	64.1848	DIVEYYNDSNGSHVLQGR	gi|4502337	2204.77	N4H5F0S2G0	1068.94	4270.72	4	-2	7.2128	-1.5455	N-linked glycosylation
21648	21658	73.4755	DQCIVDDITYNVNDTFHK	gi|16933542, gi|47132547, gi|47132549, gi|47132553, gi|47132555, gi|47132557, gi|530370025, gi|530370027, gi|530370029, gi|530370031, gi|530370033, gi|530370035, gi|530370037, gi|530370039, gi|530370041, gi|530370043, gi|530370045, gi|530370047, gi|530370049, gi|530370051, gi|530370053, gi|530370055, gi|530370057, gi|530370059, gi|530370061, gi|530370063, gi|530370065	1913.68	N4H5F0S1G0	1028.92	4110.65	4	-2	7.1758	-3.3309	N-linked glycosylation
4073	4085	25.0457	EETTVSPPHTSMAPAQDEER	gi|156231037	730.264	N2H2F0S0G0	986.753	2958.24	3	0	14.2042	-0.030077	O-linked glycosylation
7374	7379	34.0975	EETTVSPPHTSMAPAQDEER	gi|156231037	1021.36	N2H2F0S1G0	1079.12	3233.34	3	-2	10.344	-1.3165	O-linked glycosylation
13406	13409	50.6362	EHEGAIYPDNTTDFQR	gi|4557485, gi|578807061, gi|578807063, gi|578807065, gi|578807068, gi|767925751	2204.77	N4H5F0S2G0	1025.41	4097.61	4	-1	11.2931	-0.62013	N-linked glycosylation
10052	10062	41.467	EHEGAIYPDNTTDFQR	gi|4557485, gi|578807061, gi|578807063, gi|578807065, gi|578807068, gi|767925751	1913.68	N4H5F0S1G0	952.634	3806.51	4	-1	10.3083	-2.4148	N-linked glycosylation
13198	13206	50.078	EHEGAIYPDNTTDFQR	gi|4557485, gi|578807061, gi|578807063, gi|578807065, gi|578807068, gi|767925751	2350.79	N2H12F0S0G0	1062.42	4243.66	4	-3	10.2285	5.879	N-linked glycosylation
10234	10236	41.9428	EHEGAIYPDNTTDFQR	gi|4557485, gi|578807061, gi|578807063, gi|578807065, gi|578807068, gi|767925751	1913.68	N4H5F0S1G0	1270.18	3806.51	3	-2	9.3469	-1.2404	N-linked glycosylation
13003	13012	49.5435	EHEGAIYPDNTTDFQR	gi|4557485, gi|578807061, gi|578807063, gi|578807065, gi|578807068, gi|767925751	2715.96	N5H6F1S2G0	1153.71	4608.79	4	-3	9.2644	-2.6773	N-linked glycosylation
10039	10043	41.4168	EHEGAIYPDNTTDFQR	gi|4557485, gi|578807061, gi|578807063, gi|578807065, gi|578807068, gi|767925751	1913.68	N4H5F0S1G0	1269.51	3806.52	3	0	8.4004	-0.60014	N-linked glycosylation
13393	13402	50.6162	EHEGAIYPDNTTDFQR	gi|4557485, gi|578807061, gi|578807063, gi|578807065, gi|578807068, gi|767925751	2204.77	N4H5F0S2G0	1367.21	4097.61	3	-2	8.327	-0.12502	N-linked glycosylation
13211	13215	50.1037	EHEGAIYPDNTTDFQR	gi|4557485, gi|578807061, gi|578807063, gi|578807065, gi|578807068, gi|767925751	2350.79	N2H12F0S0G0	1415.9	4243.66	3	-2	8.3092	6.8739	N-linked glycosylation
9857	9869	40.9368	EHEGAIYPDNTTDFQR	gi|4557485, gi|578807061, gi|578807063, gi|578807065, gi|578807068, gi|767925751	2278.81	N5H6F0S1G0	1044.17	4171.65	4	-2	8.2982	-0.51983	N-linked glycosylation
9948	9951	41.1645	EHEGAIYPDNTTDFQR	gi|4557485, gi|578807061, gi|578807063, gi|578807065, gi|578807068, gi|767925751	2059.73	N4H5F1S1G0	989.152	3952.58	4	-1	8.2905	0.75306	N-linked glycosylation
13172	13175	49.9942	EHEGAIYPDNTTDFQR	gi|4557485, gi|578807061, gi|578807063, gi|578807065, gi|578807068, gi|767925751	2569.9	N5H6F0S2G0	1116.94	4462.73	4	-2	8.2159	-3.8098	N-linked glycosylation
7361	7367	34.0643	EHEGAIYPDNTTDFQR	gi|4557485, gi|578807061, gi|578807063, gi|578807065, gi|578807068, gi|767925751	1768.64	N4H5F1S0G0	1221.83	3661.48	3	-2	7.4206	-0.68277	N-linked glycosylation
9935	9938	41.1287	EHEGAIYPDNTTDFQR	gi|4557485, gi|578807061, gi|578807063, gi|578807065, gi|578807068, gi|767925751	2059.73	N4H5F1S1G0	1318.87	3952.58	3	-2	7.3273	-0.12343	N-linked glycosylation
9753	9756	40.6252	EHEGAIYPDNTTDFQR	gi|4557485, gi|578807061, gi|578807063, gi|578807065, gi|578807068, gi|767925751	2424.87	N5H6F1S1G0	1080.68	4317.7	4	-2	7.3163	-1.6986	N-linked glycosylation
7413	7416	34.2003	EHEGAIYPDNTTDFQR	gi|4557485, gi|578807061, gi|578807063, gi|578807065, gi|578807068, gi|767925751	1622.58	N4H5F0S0G0	1173.15	3515.42	3	-2	7.2927	-0.3529	N-linked glycosylation
13289	13293	50.3188	EHEGAIYPDNTTDFQR	gi|4557485, gi|578807061, gi|578807063, gi|578807065, gi|578807068, gi|767925751	2715.96	N5H6F1S2G0	1153.71	4608.81	4	-3	7.2691	1.6665	N-linked glycosylation
7309	7318	33.9285	EHEGAIYPDNTTDFQR	gi|4557485, gi|578807061, gi|578807063, gi|578807065, gi|578807068, gi|767925751	1987.71	N5H6F0S0G0	1294.86	3880.55	3	-2	6.3206	-1.8605	N-linked glycosylation
10182	10190	41.8157	EHEGAIYPDNTTDFQR	gi|4557485, gi|578807061, gi|578807063, gi|578807065, gi|578807068, gi|767925751	2059.73	N4H5F1S1G0	1318.53	3952.57	3	-1	6.2907	-1.8998	N-linked glycosylation
13146	13151	49.927	EHEGAIYPDNTTDFQR	gi|4557485, gi|578807061, gi|578807063, gi|578807065, gi|578807068, gi|767925751	2569.9	N5H6F0S2G0	1488.92	4462.74	3	-2	6.2847	-1.7008	N-linked glycosylation
9857	9864	40.9238	EHEGAIYPDNTTDFQR	gi|4557485, gi|578807061, gi|578807063, gi|578807065, gi|578807068, gi|767925751	2278.81	N5H6F0S1G0	1391.89	4171.65	3	-2	6.2618	-0.89723	N-linked glycosylation
17059	17070	60.7653	EHEGAIYPDNTTDFQR	gi|4557485, gi|578807061, gi|578807063, gi|578807065, gi|578807068, gi|767925751	3007.06	N5H6F1S3G0	1226.48	4899.89	4	-3	6.2178	-1.0612	N-linked glycosylation
8154	8156	36.2327	ELHHLQEQNVSNAFLDK	gi|4557485, gi|578807061, gi|578807063, gi|578807065, gi|578807068, gi|767925751	1622.58	N4H5F0S0G0	912.153	3644.59	4	-1	19.3863	0.23648	N-linked glycosylation
8050	8057	35.958	ELHHLQEQNVSNAFLDK	gi|4557485, gi|578807061, gi|578807063, gi|578807065, gi|578807068, gi|767925751	1768.64	N4H5F1S0G0	948.918	3790.64	4	-2	15.3937	-0.41024	N-linked glycosylation
13276	13285	50.2958	ELHHLQEQNVSNAFLDK	gi|4557485, gi|578807061, gi|578807063, gi|578807065, gi|578807068, gi|767925751	2204.77	N4H5F0S2G0	1057.95	4226.78	4	-2	12.2539	-0.099808	N-linked glycosylation
10416	10420	42.4437	ELHHLQEQNVSNAFLDK	gi|4557485, gi|578807061, gi|578807063, gi|578807065, gi|578807068, gi|767925751	1913.68	N4H5F0S1G0	984.927	3935.68	4	-1	11.3171	-0.44838	N-linked glycosylation
10455	10461	42.554	ELHHLQEQNVSNAFLDK	gi|4557485, gi|578807061, gi|578807063, gi|578807065, gi|578807068, gi|767925751	2278.81	N5H6F0S1G0	1076.46	4300.81	4	-2	11.3012	-0.25322	N-linked glycosylation
10611	10612	42.9658	ELHHLQEQNVSNAFLDK	gi|4557485, gi|578807061, gi|578807063, gi|578807065, gi|578807068, gi|767925751	1913.68	N4H5F0S1G0	985.428	3935.68	4	-3	11.2923	-0.97459	N-linked glycosylation
8024	8032	35.8893	ELHHLQEQNVSNAFLDK	gi|4557485, gi|578807061, gi|578807063, gi|578807065, gi|578807068, gi|767925751	1987.71	N5H6F0S0G0	1003.69	4009.71	4	-2	9.326	-0.95607	N-linked glycosylation
13276	13278	50.2778	ELHHLQEQNVSNAFLDK	gi|4557485, gi|578807061, gi|578807063, gi|578807065, gi|578807068, gi|767925751	2569.9	N5H6F0S2G0	1149.49	4591.91	4	-3	9.239	-0.37008	N-linked glycosylation
10455	10465	42.5642	ELHHLQEQNVSNAFLDK	gi|4557485, gi|578807061, gi|578807063, gi|578807065, gi|578807068, gi|767925751	1913.68	N4H5F0S1G0	1312.9	3935.68	3	-1	8.3391	0.45428	N-linked glycosylation
10273	10278	42.0568	ELHHLQEQNVSNAFLDK	gi|4557485, gi|578807061, gi|578807063, gi|578807065, gi|578807068, gi|767925751	2059.73	N4H5F1S1G0	1021.69	4081.75	4	-2	8.2761	1.7867	N-linked glycosylation
13120	13123	49.8503	ELHHLQEQNVSNAFLDK	gi|4557485, gi|578807061, gi|578807063, gi|578807065, gi|578807068, gi|767925751	2715.96	N5H6F1S2G0	1186	4737.96	4	-3	8.2595	-2.2734	N-linked glycosylation
7972	7978	35.742	ELHHLQEQNVSNAFLDK	gi|4557485, gi|578807061, gi|578807063, gi|578807065, gi|578807068, gi|767925751	2133.77	N5H6F1S0G0	1040.45	4155.77	4	-3	7.3538	-1.4453	N-linked glycosylation
13081	13086	49.7478	ELHHLQEQNVSNAFLDK	gi|4557485, gi|578807061, gi|578807063, gi|578807065, gi|578807068, gi|767925751	2569.9	N5H6F0S2G0	1149.49	4591.91	4	-3	7.2862	0.1616	N-linked glycosylation
13471	13475	50.8182	ELHHLQEQNVSNAFLDK	gi|4557485, gi|578807061, gi|578807063, gi|578807065, gi|578807068, gi|767925751	2204.77	N4H5F0S2G0	1057.7	4226.78	4	-1	7.2283	0.1163	N-linked glycosylation
13094	13100	49.7867	ELHHLQEQNVSNAFLDK	gi|4557485, gi|578807061, gi|578807063, gi|578807065, gi|578807068, gi|767925751	2350.79	N2H12F0S0G0	1094.47	4372.83	4	-2	6.2596	7.6128	N-linked glycosylation
25665	25674	84.6272	ENLTAPGSDSAVFFEQGTTR	gi|4557485, gi|578807061, gi|578807063, gi|578807065, gi|578807068, gi|767925751	2204.77	N4H5F0S2G0	1084.2	4331.77	4	-2	9.3947	-1.0786	N-linked glycosylation
20959	20962	71.5472	ENLTAPGSDSAVFFEQGTTR	gi|4557485, gi|578807061, gi|578807063, gi|578807065, gi|578807068, gi|767925751	1913.68	N4H5F0S1G0	1348.23	4040.66	3	-2	8.3404	-3.4638	N-linked glycosylation
17150	17161	61.017	ENLTAPGSDSAVFFEQGTTR	gi|4557485, gi|578807061, gi|578807063, gi|578807065, gi|578807068, gi|767925751	1622.58	N4H5F0S0G0	1251.2	3749.58	3	-2	6.4348	0.90705	N-linked glycosylation
25249	25260	83.4783	ENLTAPGSDSAVFFEQGTTR	gi|4557485, gi|578807061, gi|578807063, gi|578807065, gi|578807068, gi|767925751	2569.9	N5H6F0S2G0	1175.49	4696.91	4	-2	6.3502	2.1504	N-linked glycosylation
20621	20629	70.6203	ENLTAPGSDSAVFFEQGTTR	gi|4557485, gi|578807061, gi|578807063, gi|578807065, gi|578807068, gi|767925751	2278.81	N5H6F0S1G0	1102.71	4405.8	4	-2	6.3033	-1.6552	N-linked glycosylation
32620	32627	104.081	EPCVESLVSQYFQTVTDYGK	gi|4502149	656.228	N1H1F0S1G0	1003.11	3006.31	3	-1	11.2378	-1.4271	O-linked glycosylation
20439	20446	70.1108	FEVDSPVYNATWSASLK	gi|105990532	1622.58	N4H5F0S0G0	1179.51	3536.5	3	0	6.2478	-2.3157	N-linked glycosylation
11664	11666	45.8473	FSDGLESNSSTQFEVK	gi|178557739, gi|338858017, gi|356582273, gi|67190748, gi|768052592	1864.63	N2H9F0S0G0	1213.82	3639.45	3	0	21.4548	0.5867	N-linked glycosylation
11456	11468	45.307	FSDGLESNSSTQFEVK	gi|178557739, gi|338858017, gi|356582273, gi|67190748, gi|768052592	1864.63	N2H9F0S0G0	1214.49	3639.44	3	-2	19.4394	-2.3973	N-linked glycosylation
11469	11478	45.335	FSDGLESNSSTQFEVK	gi|178557739, gi|338858017, gi|356582273, gi|67190748, gi|768052592	1864.63	N2H9F0S0G0	1821.23	3639.44	2	-2	10.5283	-2.7293	N-linked glycosylation
29435	29438	95.1367	FSEFWDLDPEVRPTSAVAA	gi|4557323	656.228	N1H1F0S1G0	931.756	2793.25	3	0	21.3721	0.63234	O-linked glycosylation
29877	29878	96.3698	FSEFWDLDPEVRPTSAVAA	gi|4557323	656.228	N1H1F0S1G0	931.757	2793.26	3	0	15.3596	1.6812	O-linked glycosylation
29747	29753	96.0178	FSEFWDLDPEVRPTSAVAA	gi|4557323	673.243	N1H2F1S0G0	938.101	2810.28	3	-2	13.3787	4.6984	O-linked glycosylation
25015	25019	82.8083	FSEFWDLDPEVRPTSAVAA	gi|4557323	365.132	N1H1F0S0G0	834.722	2502.15	3	0	13.2631	-2.2936	O-linked glycosylation
25028	25033	82.8472	FSEFWDLDPEVRPTSAVAA	gi|4557323	365.132	N1H1F0S0G0	1251.59	2502.17	2	0	12.503	3.6389	O-linked glycosylation
29682	29690	95.8408	FSEFWDLDPEVRPTSAVAA	gi|4557323	656.228	N1H1F0S1G0	932.425	2793.25	3	-2	8.351	0.21868	O-linked glycosylation
34856	34859	110.39	FSEFWDLDPEVRPTSAVAA	gi|4557323	947.323	N1H1F0S2G0	1028.79	3084.35	3	0	8.3493	-0.37786	O-linked glycosylation
30059	30066	96.8952	FSEFWDLDPEVRPTSAVAA	gi|4557323	656.228	N1H1F0S1G0	932.089	2793.25	3	-1	6.3565	-1.0494	O-linked glycosylation
29734	29740	95.9813	FSEFWDLDPEVRPTSAVAA	gi|4557323	656.228	N1H1F0S1G0	1397.13	2793.25	2	0	5.429	-2.4005	O-linked glycosylation
35038	35040	110.903	FSEFWDLDPEVRPTSAVAA	gi|4557323	947.323	N1H1F0S2G0	1028.79	3084.35	3	0	5.336	0.92819	O-linked glycosylation
25535	25547	84.2748	FSVATQTCQITPAEGPVVTAQYDCLGCVHPISTQSPDLEPILR	gi|156231037, gi|262050546, gi|4504893	365.132	N1H1F0S0G0	1281.87	5121.45	4	-3	9.2666	2.6409	O-linked glycosylation
4112	4123	25.1445	FVEGSHNSTVSLTTK	gi|105990532	1622.58	N4H5F0S0G0	1077.47	3229.4	3	-1	18.4149	2.2071	N-linked glycosylation
6113	6125	30.6485	FVEGSHNSTVSLTTK	gi|105990532	1710.6	N3H5F0S1G0	1107.14	3317.39	3	-2	7.5178	-4.0537	N-linked glycosylation
6061	6065	30.486	FVEGSHNSTVSLTTK	gi|105990532	1913.68	N4H5F0S1G0	1174.83	3520.47	3	-2	7.4407	-2.7951	N-linked glycosylation
33855	33857	107.544	GCVLLSYLNETVTVSASLESVR	gi|578822814, gi|66932947	1913.68	N4H5F0S1G0	1078.73	4310.91	4	-1	13.4144	0.36801	N-linked glycosylation
38676	38682	121.824	GCVLLSYLNETVTVSASLESVR	gi|578822814, gi|66932947	2204.77	N4H5F0S2G0	1535.34	4602	3	-2	8.3283	-1.6685	N-linked glycosylation
33686	33690	107.072	GCVLLSYLNETVTVSASLESVR	gi|578822814, gi|66932947	2059.73	N4H5F1S1G0	1115.5	4456.97	4	-2	7.249	0.41622	N-linked glycosylation
33387	33390	106.226	GFGVAIVGNYTAALPTEAALR	gi|156616294, gi|578832955	2204.77	N4H5F0S2G0	1075.23	4295.9	4	-2	8.2822	0.98084	N-linked glycosylation
16552	16559	59.3445	GLTFQQNASSMCGPDQDTAIR	gi|38635953	2059.73	N4H5F1S1G0	1090.45	4356.77	4	-2	10.3333	0.96416	N-linked glycosylation
13458	13470	50.8028	GLTFQQNASSMCGPDQDTAIR	gi|38635953	1971.72	N5H5F1S0G0	1068.19	4268.75	4	-1	9.2875	-0.42991	N-linked glycosylation
16487	16493	59.1625	GLTFQQNASSMCGPDQDTAIR	gi|38635953	2262.81	N5H5F1S1G0	1141.47	4559.84	4	-3	6.1205	-1.4862	N-linked glycosylation
15954	15963	57.6935	GLTFQQNASSMCVPDQDTAIR	gi|38635953	1971.72	N5H5F1S0G0	1078.96	4310.8	4	-2	12.4419	1.2706	N-linked glycosylation
19048	19056	66.2607	GLTFQQNASSMCVPDQDTAIR	gi|38635953	2262.81	N5H5F1S1G0	1151.73	4601.89	4	-2	9.447	-0.86602	N-linked glycosylation
19165	19171	66.5793	GLTFQQNASSMCVPDQDTAIR	gi|38635953	2059.73	N4H5F1S1G0	1100.71	4398.81	4	-1	8.1755	-0.51949	N-linked glycosylation
19113	19122	66.4433	GLTFQQNASSMCVPDQDTAIR	gi|38635953	2059.73	N4H5F1S1G0	1467.61	4398.81	3	-2	7.3999	0.41348	N-linked glycosylation
11950	11952	46.6355	HANWTLTPLK	gi|19923106	1913.68	N4H5F0S1G0	1032.45	3094.32	3	-1	8.365	-0.55215	N-linked glycosylation
8323	8332	36.7177	HANWTLTPLK	gi|19923106	1622.58	N4H5F0S0G0	935.417	2803.23	3	-1	6.3648	1.2855	N-linked glycosylation
16136	16140	58.186	HANWTLTPLK	gi|19923106	2204.77	N4H5F0S2G0	1129.48	3385.42	3	-1	6.3416	-0.99206	N-linked glycosylation
4125	4133	25.1712	HEEGHMLNCTCFGQGR	gi|16933542, gi|47132547, gi|47132549, gi|47132553, gi|47132555, gi|47132557, gi|530370025, gi|530370027, gi|530370029, gi|530370031, gi|530370033, gi|530370035, gi|530370037, gi|530370039, gi|530370041, gi|530370043, gi|530370045, gi|530370047, gi|530370049, gi|530370051, gi|530370053, gi|530370055, gi|530370057, gi|530370059, gi|530370061, gi|530370063, gi|530370065	1622.58	N4H5F0S0G0	889.85	3555.37	4	-1	9.4102	0.18	N-linked glycosylation
6074	6086	30.5422	HEEGHMLNCTCFGQGR	gi|16933542, gi|47132547, gi|47132549, gi|47132553, gi|47132555, gi|47132557, gi|530370025, gi|530370027, gi|530370029, gi|530370031, gi|530370033, gi|530370035, gi|530370037, gi|530370039, gi|530370041, gi|530370043, gi|530370045, gi|530370047, gi|530370049, gi|530370051, gi|530370053, gi|530370055, gi|530370057, gi|530370059, gi|530370061, gi|530370063, gi|530370065	1913.68	N4H5F0S1G0	962.622	3846.46	4	-1	9.3518	-1.8494	N-linked glycosylation
4073	4079	25.0302	HEEGHMLNCTCFGQGR	gi|16933542, gi|47132547, gi|47132549, gi|47132553, gi|47132555, gi|47132557, gi|530370025, gi|530370027, gi|530370029, gi|530370031, gi|530370033, gi|530370035, gi|530370037, gi|530370039, gi|530370041, gi|530370043, gi|530370045, gi|530370047, gi|530370049, gi|530370051, gi|530370053, gi|530370055, gi|530370057, gi|530370059, gi|530370061, gi|530370063, gi|530370065	1622.58	N4H5F0S0G0	893.598	3571.37	4	0	8.281	0.081514	N-linked glycosylation
8570	8575	37.3858	HEEGHMLNCTCFGQGR	gi|16933542, gi|47132547, gi|47132549, gi|47132553, gi|47132555, gi|47132557, gi|530370025, gi|530370027, gi|530370029, gi|530370031, gi|530370033, gi|530370035, gi|530370037, gi|530370039, gi|530370041, gi|530370043, gi|530370045, gi|530370047, gi|530370049, gi|530370051, gi|530370053, gi|530370055, gi|530370057, gi|530370059, gi|530370061, gi|530370063, gi|530370065	2204.77	N4H5F0S2G0	1035.4	4137.55	4	-1	5.3296	-2.059	N-linked glycosylation
13588	13590	51.1365	HYTNPSQDVTVPCPVPSTPPTPSPSTPPTPSPSCCHPR	gi|31615935	1751.62	N4H4F0S1G0	1472.88	5888.51	4	0	17.2457	-1.583	O-linked glycosylation
13601	13604	51.1747	HYTNPSQDVTVPCPVPSTPPTPSPSTPPTPSPSCCHPR	gi|31615935	1751.62	N4H4F0S1G0	1178.51	5888.51	5	0	17.1947	-1.0669	O-linked glycosylation
15278	15279	55.8075	HYTNPSQDVTVPCPVPSTPPTPSPSTPPTPSPSCCHPR	gi|31615935	2042.72	N4H4F0S2G0	1237.53	6179.6	5	-4	16.1845	-1.0452	O-linked glycosylation
14004	14006	52.2865	HYTNPSQDVTVPCPVPSTPPTPSPSTPPTPSPSCCHPR	gi|31615935	1589.57	N4H3F0S1G0	1433.12	5726.45	4	-3	15.233	-1.9243	O-linked glycosylation
12301	12309	47.618	HYTNPSQDVTVPCPVPSTPPTPSPSTPPTPSPSCCHPR	gi|31615935	1298.48	N4H3F0S0G0	1360.85	5435.37	4	-5	15.2304	0.096109	O-linked glycosylation
12067	12069	46.9563	HYTNPSQDVTVPCPVPSTPPTPSPSTPPTPSPSCCHPR	gi|31615935	1460.53	N4H4F0S0G0	1400.61	5597.41	4	-2	15.2289	-1.0863	O-linked glycosylation
12340	12344	47.7148	HYTNPSQDVTVPCPVPSTPPTPSPSTPPTPSPSCCHPR	gi|31615935	1298.48	N4H3F0S0G0	1088.28	5435.36	5	-2	15.1928	-0.68217	O-linked glycosylation
12015	12016	46.8102	HYTNPSQDVTVPCPVPSTPPTPSPSTPPTPSPSCCHPR	gi|31615935	1501.56	N5H3F0S0G0	1411.12	5638.44	4	-3	14.2317	-1.3683	O-linked glycosylation
15083	15087	55.2745	HYTNPSQDVTVPCPVPSTPPTPSPSTPPTPSPSCCHPR	gi|31615935	2042.72	N4H4F0S2G0	1237.53	6179.61	5	-4	14.2239	0.33756	O-linked glycosylation
15278	15280	55.8102	HYTNPSQDVTVPCPVPSTPPTPSPSTPPTPSPSCCHPR	gi|31615935	2083.75	N5H3F0S2G0	1245.53	6220.63	5	-3	14.2088	-1.1448	O-linked glycosylation
14043	14044	52.3923	HYTNPSQDVTVPCPVPSTPPTPSPSTPPTPSPSCCHPR	gi|31615935	1589.57	N4H3F0S1G0	1146.5	5726.45	5	-2	14.1956	-2.5344	O-linked glycosylation
13406	13410	50.6387	HYTNPSQDVTVPCPVPSTPPTPSPSTPPTPSPSCCHPR	gi|31615935	1751.62	N4H4F0S1G0	1178.91	5888.51	5	-2	14.1938	-0.4235	O-linked glycosylation
12496	12497	48.1328	HYTNPSQDVTVPCPVPSTPPTPSPSTPPTPSPSCCHPR	gi|31615935	1298.48	N4H3F0S0G0	1360.35	5435.36	4	-3	13.231	-0.55596	O-linked glycosylation
13939	13945	52.1167	HYTNPSQDVTVPCPVPSTPPTPSPSTPPTPSPSCCHPR	gi|31615935	1386.49	N3H3F0S1G0	1382.35	5523.37	4	-3	13.2256	-2.0294	O-linked glycosylation
12730	12741	48.7998	HYTNPSQDVTVPCPVPSTPPTPSPSTPPTPSPSCCHPR	gi|31615935	1136.42	N4H2F0S0G0	1320.09	5273.32	4	-4	13.2231	1.1181	O-linked glycosylation
15291	15293	55.846	HYTNPSQDVTVPCPVPSTPPTPSPSTPPTPSPSCCHPR	gi|31615935	2042.72	N4H4F0S2G0	1546.41	6179.61	4	-3	13.2208	0.072573	O-linked glycosylation
13991	14001	52.2707	HYTNPSQDVTVPCPVPSTPPTPSPSTPPTPSPSCCHPR	gi|31615935	1752.64	N4H4F2S0G0	1179.31	5889.5	5	-3	13.206	-5.2652	O-linked glycosylation
14186	14191	52.7988	HYTNPSQDVTVPCPVPSTPPTPSPSTPPTPSPSCCHPR	gi|31615935	1751.62	N4H4F0S1G0	1179.11	5888.51	5	-3	13.1868	-0.72373	O-linked glycosylation
13757	13768	51.6263	HYTNPSQDVTVPCPVPSTPPTPSPSTPPTPSPSCCHPR	gi|31615935	1386.49	N3H3F0S1G0	1106.08	5523.37	5	-3	13.1757	-1.8107	O-linked glycosylation
12561	12570	48.3313	HYTNPSQDVTVPCPVPSTPPTPSPSTPPTPSPSCCHPR	gi|31615935	933.344	N3H2F0S0G0	1269.07	5070.24	4	-3	12.2403	0.63145	O-linked glycosylation
13393	13401	50.6135	HYTNPSQDVTVPCPVPSTPPTPSPSTPPTPSPSCCHPR	gi|31615935	1751.62	N4H4F0S1G0	1473.89	5888.52	4	-4	12.2402	1.1963	O-linked glycosylation
14186	14188	52.7912	HYTNPSQDVTVPCPVPSTPPTPSPSTPPTPSPSCCHPR	gi|31615935	1751.62	N4H4F0S1G0	1473.64	5888.51	4	-3	12.2291	-0.55576	O-linked glycosylation
11859	11863	46.3895	HYTNPSQDVTVPCPVPSTPPTPSPSTPPTPSPSCCHPR	gi|31615935	1501.56	N5H3F0S0G0	1128.9	5638.44	5	-2	12.2063	-0.68888	O-linked glycosylation
13848	13854	51.865	HYTNPSQDVTVPCPVPSTPPTPSPSTPPTPSPSCCHPR	gi|31615935	1589.57	N4H3F0S1G0	1146.7	5726.46	5	-3	12.1822	0.034653	O-linked glycosylation
12093	12095	47.0277	HYTNPSQDVTVPCPVPSTPPTPSPSTPPTPSPSCCHPR	gi|31615935	1460.53	N4H4F0S0G0	1120.89	5597.41	5	-3	12.1746	-2.3203	O-linked glycosylation
11898	11906	46.5077	HYTNPSQDVTVPCPVPSTPPTPSPSTPPTPSPSCCHPR	gi|31615935	1460.53	N4H4F0S0G0	1120.89	5597.41	5	-3	12.1368	-0.90276	O-linked glycosylation
13796	13803	51.724	HYTNPSQDVTVPCPVPSTPPTPSPSTPPTPSPSCCHPR	gi|31615935	1751.62	N4H4F0S1G0	1473.63	5888.49	4	-3	11.2761	-3.6238	O-linked glycosylation
13744	13750	51.5777	HYTNPSQDVTVPCPVPSTPPTPSPSTPPTPSPSCCHPR	gi|31615935	1386.49	N3H3F0S1G0	1382.6	5523.38	4	-4	11.2384	-0.78037	O-linked glycosylation
11820	11825	46.2843	HYTNPSQDVTVPCPVPSTPPTPSPSTPPTPSPSCCHPR	gi|31615935	1501.56	N5H3F0S0G0	1411.37	5638.44	4	-4	11.224	-1.0107	O-linked glycosylation
14381	14388	53.3442	HYTNPSQDVTVPCPVPSTPPTPSPSTPPTPSPSCCHPR	gi|31615935	1752.64	N4H4F2S0G0	1179.51	5889.49	5	-4	11.2007	-7.638	O-linked glycosylation
11417	11418	45.1742	HYTNPSQDVTVPCPVPSTPPTPSPSTPPTPSPSCCHPR	gi|31615935	1825.66	N5H5F0S0G0	1193.71	5962.54	5	-2	11.1931	-2.6593	O-linked glycosylation
13796	13805	51.7292	HYTNPSQDVTVPCPVPSTPPTPSPSTPPTPSPSCCHPR	gi|31615935	1751.62	N4H4F0S1G0	1178.91	5888.51	5	-2	11.1637	-1.2527	O-linked glycosylation
11664	11675	45.8703	HYTNPSQDVTVPCPVPSTPPTPSPSTPPTPSPSCCHPR	gi|31615935	1704.63	N6H3F0S0G0	1169.71	5841.49	5	-3	11.1624	-5.3861	O-linked glycosylation
11872	11877	46.428	HYTNPSQDVTVPCPVPSTPPTPSPSTPPTPSPSCCHPR	gi|31615935	1460.53	N4H4F0S0G0	1400.61	5597.43	4	-2	10.2219	1.1818	O-linked glycosylation
12145	12150	47.1787	HYTNPSQDVTVPCPVPSTPPTPSPSTPPTPSPSCCHPR	gi|31615935	1095.4	N3H3F0S0G0	1309.58	5232.28	4	-3	10.2174	-0.61382	O-linked glycosylation
14238	14250	52.961	HYTNPSQDVTVPCPVPSTPPTPSPSTPPTPSPSCCHPR	gi|31615935	1589.57	N4H3F0S1G0	1146.7	5726.44	5	-3	10.1814	-4.0156	O-linked glycosylation
15187	15199	55.5837	HYTNPSQDVTVPCPVPSTPPTPSPSTPPTPSPSCCHPR	gi|31615935	2083.75	N5H3F0S2G0	1556.66	6220.62	4	-3	9.2712	-3.1836	O-linked glycosylation
12340	12342	47.7097	HYTNPSQDVTVPCPVPSTPPTPSPSTPPTPSPSCCHPR	gi|31615935	1095.4	N3H3F0S0G0	1309.58	5232.3	4	-3	9.2545	3.399	O-linked glycosylation
14381	14386	53.3388	HYTNPSQDVTVPCPVPSTPPTPSPSTPPTPSPSCCHPR	gi|31615935	1752.64	N4H4F2S0G0	1473.88	5889.48	4	-3	9.2303	-8.6622	O-linked glycosylation
12509	12514	48.1792	HYTNPSQDVTVPCPVPSTPPTPSPSTPPTPSPSCCHPR	gi|31615935	1460.53	N4H4F0S0G0	1400.61	5597.41	4	-2	9.2242	-0.82457	O-linked glycosylation
15096	15105	55.3233	HYTNPSQDVTVPCPVPSTPPTPSPSTPPTPSPSCCHPR	gi|31615935	2042.72	N4H4F0S2G0	1546.41	6179.61	4	-3	9.204	0.2306	O-linked glycosylation
12301	12310	47.6205	HYTNPSQDVTVPCPVPSTPPTPSPSTPPTPSPSCCHPR	gi|31615935	1339.5	N5H2F0S0G0	1370.6	5476.39	4	-3	9.2008	-1.3968	O-linked glycosylation
14836	14842	54.5948	HYTNPSQDVTVPCPVPSTPPTPSPSTPPTPSPSCCHPR	gi|31615935	1590.59	N4H3F2S0G0	1433.37	5727.44	4	-3	9.2005	-7.1908	O-linked glycosylation
12496	12507	48.1587	HYTNPSQDVTVPCPVPSTPPTPSPSTPPTPSPSCCHPR	gi|31615935	1938.71	N5H3F1S1G0	1216.32	6075.57	5	-2	9.1827	-4.353	O-linked glycosylation
15473	15480	56.3637	HYTNPSQDVTVPCPVPSTPPTPSPSTPPTPSPSCCHPR	gi|31615935	2042.72	N4H4F0S2G0	1237.53	6179.6	5	-4	9.1619	-1.3415	O-linked glycosylation
16136	16144	58.1965	HYTNPSQDVTVPCPVPSTPPTPSPSTPPTPSPSCCHPR	gi|31615935	2042.72	N4H4F0S2G0	1546.66	6179.59	4	-4	8.2341	-3.6309	O-linked glycosylation
13809	13815	51.7572	HYTNPSQDVTVPCPVPSTPPTPSPSTPPTPSPSCCHPR	gi|31615935	1589.57	N4H3F0S1G0	1433.12	5726.45	4	-3	8.2005	-1.9243	O-linked glycosylation
16006	16011	57.8272	HYTNPSQDVTVPCPVPSTPPTPSPSTPPTPSPSCCHPR	gi|31615935	2043.74	N4H4F2S1G0	1237.53	6180.6	5	-3	8.1823	-4.8891	O-linked glycosylation
16201	16209	58.3758	HYTNPSQDVTVPCPVPSTPPTPSPSTPPTPSPSCCHPR	gi|31615935	2043.74	N4H4F2S1G0	1236.92	6180.57	5	0	8.1752	-8.9686	O-linked glycosylation
14641	14646	54.0538	HYTNPSQDVTVPCPVPSTPPTPSPSTPPTPSPSCCHPR	gi|31615935	1590.59	N4H3F2S0G0	1433.37	5727.43	4	-3	8.1709	-8.7253	O-linked glycosylation
15668	15670	56.8877	HYTNPSQDVTVPCPVPSTPPTPSPSTPPTPSPSCCHPR	gi|31615935	2043.74	N4H4F2S1G0	1237.53	6180.62	5	-3	8.1687	-2.0253	O-linked glycosylation
14706	14713	54.2387	HYTNPSQDVTVPCPVPSTPPTPSPSTPPTPSPSCCHPR	gi|31615935	1590.59	N4H3F2S0G0	1146.49	5727.43	5	-1	8.1567	-8.9201	O-linked glycosylation
11222	11232	44.6618	HYTNPSQDVTVPCPVPSTPPTPSPSTPPTPSPSCCHPR	gi|31615935	1825.66	N5H5F0S0G0	1193.92	5962.54	5	-3	8.1522	-1.318	O-linked glycosylation
13627	13634	51.2568	HYTNPSQDVTVPCPVPSTPPTPSPSTPPTPSPSCCHPR	gi|31615935	1752.64	N4H4F2S0G0	982.926	5889.5	6	-3	8.149	-5.3295	O-linked glycosylation
12015	12023	46.8283	HYTNPSQDVTVPCPVPSTPPTPSPSTPPTPSPSCCHPR	gi|31615935	1825.66	N5H5F0S0G0	1194.11	5962.53	5	-4	7.1935	-4.276	O-linked glycosylation
14199	14205	52.8375	HYTNPSQDVTVPCPVPSTPPTPSPSTPPTPSPSCCHPR	gi|31615935	1589.57	N4H3F0S1G0	1433.37	5726.43	4	-4	7.1551	-5.2387	O-linked glycosylation
15083	15093	55.29	HYTNPSQDVTVPCPVPSTPPTPSPSTPPTPSPSCCHPR	gi|31615935	2083.75	N5H3F0S2G0	1245.53	6220.63	5	-3	7.1523	-0.94852	O-linked glycosylation
11235	11241	44.6873	HYTNPSQDVTVPCPVPSTPPTPSPSTPPTPSPSCCHPR	gi|31615935	1825.66	N5H5F0S0G0	1491.9	5962.55	4	-2	7.1356	0.14757	O-linked glycosylation
14706	14715	54.2438	HYTNPSQDVTVPCPVPSTPPTPSPSTPPTPSPSCCHPR	gi|31615935	1387.51	N3H3F2S0G0	1382.6	5524.36	4	-3	6.2106	-7.4011	O-linked glycosylation
12210	12222	47.377	HYTNPSQDVTVPCPVPSTPPTPSPSTPPTPSPSCCHPR	gi|31615935	1501.56	N5H3F0S0G0	1411.62	5638.44	4	-5	6.1625	-1.5191	O-linked glycosylation
11612	11619	45.7188	HYTNPSQDVTVPCPVPSTPPTPSPSTPPTPSPSCCHPR	gi|31615935	1704.63	N6H3F0S0G0	1461.89	5841.52	4	-3	6.1526	-0.45231	O-linked glycosylation
28525	28532	92.5947	IEETTMTTQTPAPIQAPSAILPLPGQSVER	gi|262050538, gi|31542984	1021.36	N2H2F0S1G0	1050.51	4198.03	4	-1	7.5521	3.6417	O-linked glycosylation
8258	8260	36.5205	IPCSQPPQIEHGTINSSR	gi|62739186	1913.68	N4H5F0S1G0	984.673	3934.67	4	-1	7.2372	0.34325	N-linked glycosylation
22649	22657	76.2502	IPSCDSSPVSTEQLAPTAPPELTPVVQDCYHGDGQSYR	gi|4505881	656.228	N1H1F0S1G0	1205.04	4815.14	4	-2	14.2541	1.0964	O-linked glycosylation
21414	21424	72.8273	LANLTQGEDQYYLR	gi|355594753, gi|578815184	2204.77	N4H5F0S2G0	1297.87	3888.6	3	-3	5.3098	-2.4527	N-linked glycosylation
24989	25001	82.7572	LDAPTNLQFVNETDSTVLVR	gi|16933542, gi|47132549, gi|47132553, gi|47132555, gi|47132557, gi|530370025, gi|530370027, gi|530370029, gi|530370031, gi|530370033, gi|530370035, gi|530370037, gi|530370039, gi|530370041, gi|530370043, gi|530370045, gi|530370047, gi|530370049, gi|530370051, gi|530370053, gi|530370055, gi|530370057, gi|530370059, gi|530370061, gi|530370063, gi|530370065	1913.68	N4H5F0S1G0	1037.72	4145.84	4	-2	8.1718	3.6544	N-linked glycosylation
24950	24962	82.649	LDAPTNLQFVNETDSTVLVR	gi|16933542, gi|47132549, gi|47132553, gi|47132555, gi|47132557, gi|530370025, gi|530370027, gi|530370029, gi|530370031, gi|530370033, gi|530370035, gi|530370037, gi|530370039, gi|530370041, gi|530370043, gi|530370045, gi|530370047, gi|530370049, gi|530370051, gi|530370053, gi|530370055, gi|530370057, gi|530370059, gi|530370061, gi|530370063, gi|530370065	1913.68	N4H5F0S1G0	1383.28	4145.82	3	-2	6.1929	-1.9958	N-linked glycosylation
31918	31919	102.095	LGACNDTLQQLMEVFK	gi|4502261, gi|530364787	1913.68	N4H5F0S1G0	1260.87	3780.6	3	0	6.2383	2.4916	N-linked glycosylation
12977	12985	49.4708	LGNWSAMPSCK	gi|153266841	1913.68	N4H5F0S1G0	1055.41	3164.23	3	0	8.4445	-4.6833	N-linked glycosylation
17670	17676	62.4423	LGNWSAMPSCK	gi|153266841	2204.77	N4H5F0S2G0	1152.45	3455.34	3	0	7.3538	1.2749	N-linked glycosylation
9181	9190	39.0737	LGNWSAMPSCK	gi|153266841	1622.58	N4H5F0S0G0	959.057	2873.15	3	-2	6.4657	-0.014688	N-linked glycosylation
5554	5560	29.0958	LGNWSAMPSCK	gi|153266841	1622.58	N4H5F0S0G0	964.056	2889.15	3	-1	5.3258	2.0828	N-linked glycosylation
8102	8110	36.1037	LHINHNNLTESVGPLPK	gi|4505047	1768.64	N4H5F1S0G0	913.672	3651.66	4	0	9.4214	2.5702	N-linked glycosylation
10247	10257	41.9988	LHINHNNLTESVGPLPK	gi|4505047	2059.73	N4H5F1S1G0	986.945	3942.75	4	-2	6.3365	0.44594	N-linked glycosylation
20062	20069	69.062	LLDMLQYYLNLTEANLK	gi|24307911, gi|530383315, gi|530383317, gi|530383323, gi|530383325, gi|554790358	1710.6	N3H5F0S1G0	942.436	3765.72	4	-1	8.2416	9.0602	N-linked glycosylation
15655	15663	56.8672	LNAENNATFYFK	gi|323714253, gi|5031631	1913.68	N4H5F0S1G0	1116.13	3345.37	3	-1	5.3803	1.0529	N-linked glycosylation
25938	25942	85.3768	LPTQNITFQTESSVAEQEAEFQSPK	gi|262050538, gi|31542984	2204.77	N4H5F0S2G0	1255.04	5014.13	4	-3	7.1949	0.10383	N-linked glycosylation
19828	19829	68.4032	MVSHHNLTTGATLINEQWLLTTAK	gi|186910296, gi|45580723, gi|4826762, gi|767989864, gi|767989866, gi|767989868	1913.68	N4H5F0S1G0	1149.52	4593.07	4	-2	24.3409	-0.41017	N-linked glycosylation
19243	19244	66.7828	MVSHHNLTTGATLINEQWLLTTAK	gi|186910296, gi|45580723, gi|4826762, gi|767989864, gi|767989866, gi|767989868	1913.68	N4H5F0S1G0	1153.52	4609.06	4	-2	23.2809	-0.57668	N-linked glycosylation
22649	22650	76.2322	MVSHHNLTTGATLINEQWLLTTAK	gi|186910296, gi|45580723, gi|4826762, gi|767989864, gi|767989866, gi|767989868	2204.77	N4H5F0S2G0	1222.3	4884.16	4	-2	21.3112	-1.0235	N-linked glycosylation
19438	19439	67.321	MVSHHNLTTGATLINEQWLLTTAK	gi|186910296, gi|45580723, gi|4826762, gi|767989864, gi|767989866, gi|767989868	1913.68	N4H5F0S1G0	1153.52	4609.06	4	-2	20.2951	-0.68262	N-linked glycosylation
20023	20024	68.94	MVSHHNLTTGATLINEQWLLTTAK	gi|186910296, gi|45580723, gi|4826762, gi|767989864, gi|767989866, gi|767989868	1913.68	N4H5F0S1G0	1149.27	4593.07	4	-1	18.3566	0.42655	N-linked glycosylation
20582	20583	70.4933	MVSHHNLTTGATLINEQWLLTTAK	gi|186910296, gi|45580723, gi|4826762, gi|767989864, gi|767989866, gi|767989868	1914.7	N4H5F2S0G0	1149.77	4594.05	4	-2	15.1925	-8.8894	N-linked glycosylation
16903	16904	60.3043	MVSHHNLTTGATLINEQWLLTTAK	gi|186910296, gi|45580723, gi|4826762, gi|767989864, gi|767989866, gi|767989868	1954.7	N5H4F0S1G0	931.225	4650.09	5	-2	15.1703	-0.57185	N-linked glycosylation
19698	19700	68.0465	MVSHHNLTTGATLINEQWLLTTAK	gi|186910296, gi|45580723, gi|4826762, gi|767989864, gi|767989866, gi|767989868	2278.81	N5H6F0S1G0	1240.81	4958.2	4	-2	14.3211	-0.74883	N-linked glycosylation
22831	22832	76.7397	MVSHHNLTTGATLINEQWLLTTAK	gi|186910296, gi|45580723, gi|4826762, gi|767989864, gi|767989866, gi|767989868	2204.77	N4H5F0S2G0	1222.3	4884.16	4	-2	14.2755	-0.62358	N-linked glycosylation
19867	19872	68.5202	MVSHHNLTTGATLINEQWLLTTAK	gi|186910296, gi|45580723, gi|4826762, gi|767989864, gi|767989866, gi|767989868	1913.68	N4H5F0S1G0	1532.7	4593.06	3	-3	13.3795	-1.0581	N-linked glycosylation
16617	16624	59.5247	MVSHHNLTTGATLINEQWLLTTAK	gi|186910296, gi|45580723, gi|4826762, gi|767989864, gi|767989866, gi|767989868	1622.58	N4H5F0S0G0	1080.25	4317.96	4	0	13.1818	-2.2981	N-linked glycosylation
16708	16712	59.768	MVSHHNLTTGATLINEQWLLTTAK	gi|186910296, gi|45580723, gi|4826762, gi|767989864, gi|767989866, gi|767989868	1954.7	N5H4F0S1G0	930.823	4650.08	5	0	13.1434	-1.6491	N-linked glycosylation
14849	14858	54.638	MVSHHNLTTGATLINEQWLLTTAK	gi|186910296, gi|45580723, gi|4826762, gi|767989864, gi|767989866, gi|767989868	1663.61	N5H4F0S0G0	873.005	4358.99	5	-2	12.205	-1.4917	N-linked glycosylation
14888	14898	54.7485	MVSHHNLTTGATLINEQWLLTTAK	gi|186910296, gi|45580723, gi|4826762, gi|767989864, gi|767989866, gi|767989868	1663.61	N5H4F0S0G0	1091	4358.99	4	-2	12.1537	-1.5168	N-linked glycosylation
22246	22248	75.116	MVSHHNLTTGATLINEQWLLTTAK	gi|186910296, gi|45580723, gi|4826762, gi|767989864, gi|767989866, gi|767989868	2204.77	N4H5F0S2G0	1226.3	4900.15	4	-2	11.2932	-1.1781	N-linked glycosylation
19685	19689	68.0155	MVSHHNLTTGATLINEQWLLTTAK	gi|186910296, gi|45580723, gi|4826762, gi|767989864, gi|767989866, gi|767989868	1913.68	N4H5F0S1G0	919.822	4593.07	5	-2	11.2826	0.75649	N-linked glycosylation
17891	17894	63.0487	MVSHHNLTTGATLINEQWLLTTAK	gi|186910296, gi|45580723, gi|4826762, gi|767989864, gi|767989866, gi|767989868	1622.58	N4H5F0S0G0	1076.75	4301.95	4	-2	11.2668	-5.2755	N-linked glycosylation
17189	17196	61.115	MVSHHNLTTGATLINEQWLLTTAK	gi|186910296, gi|45580723, gi|4826762, gi|767989864, gi|767989866, gi|767989868	1622.58	N4H5F0S0G0	1435.33	4301.97	3	-2	10.4126	-1.6972	N-linked glycosylation
22493	22497	75.808	MVSHHNLTTGATLINEQWLLTTAK	gi|186910296, gi|45580723, gi|4826762, gi|767989864, gi|767989866, gi|767989868	2204.77	N4H5F0S2G0	978.04	4884.16	5	-2	10.3182	-0.75111	N-linked glycosylation
19633	19638	67.8735	MVSHHNLTTGATLINEQWLLTTAK	gi|186910296, gi|45580723, gi|4826762, gi|767989864, gi|767989866, gi|767989868	1913.68	N4H5F0S1G0	1150.03	4593.07	4	-4	10.2947	-0.80792	N-linked glycosylation
23468	23471	78.5115	MVSHHNLTTGATLINEQWLLTTAK	gi|186910296, gi|45580723, gi|4826762, gi|767989864, gi|767989866, gi|767989868	2205.79	N4H5F2S1G0	1222.54	4885.14	4	-2	10.1682	-8.8974	N-linked glycosylation
16539	16547	59.311	MVSHHNLTTGATLINEQWLLTTAK	gi|186910296, gi|45580723, gi|4826762, gi|767989864, gi|767989866, gi|767989868	1913.68	N4H5F0S1G0	920.022	4593.07	5	-3	10.1166	-0.42573	N-linked glycosylation
17124	17129	60.9293	MVSHHNLTTGATLINEQWLLTTAK	gi|186910296, gi|45580723, gi|4826762, gi|767989864, gi|767989866, gi|767989868	1622.58	N4H5F0S0G0	1076.5	4301.97	4	-1	9.3908	-1.4311	N-linked glycosylation
22025	22034	74.519	MVSHHNLTTGATLINEQWLLTTAK	gi|186910296, gi|45580723, gi|4826762, gi|767989864, gi|767989866, gi|767989868	2204.77	N4H5F0S2G0	981.24	4900.16	5	-2	9.2808	0.052478	N-linked glycosylation
22415	22416	75.5833	MVSHHNLTTGATLINEQWLLTTAK	gi|186910296, gi|45580723, gi|4826762, gi|767989864, gi|767989866, gi|767989868	2569.9	N5H6F0S2G0	1313.58	5249.29	4	-2	9.2774	-0.8356	N-linked glycosylation
19204	19210	66.6873	MVSHHNLTTGATLINEQWLLTTAK	gi|186910296, gi|45580723, gi|4826762, gi|767989864, gi|767989866, gi|767989868	2245.8	N5H4F0S2G0	989.245	4941.19	5	-1	9.1406	0.7827	N-linked glycosylation
19503	19508	67.5115	MVSHHNLTTGATLINEQWLLTTAK	gi|186910296, gi|45580723, gi|4826762, gi|767989864, gi|767989866, gi|767989868	2278.81	N5H6F0S1G0	1241.06	4958.2	4	-3	8.3374	-1.2285	N-linked glycosylation
19620	19623	67.8322	MVSHHNLTTGATLINEQWLLTTAK	gi|186910296, gi|45580723, gi|4826762, gi|767989864, gi|767989866, gi|767989868	2059.73	N4H5F1S1G0	1186.04	4739.13	4	-2	8.316	0.47008	N-linked glycosylation
22454	22458	75.7	MVSHHNLTTGATLINEQWLLTTAK	gi|186910296, gi|45580723, gi|4826762, gi|767989864, gi|767989866, gi|767989868	2204.77	N4H5F0S2G0	1222.3	4884.16	4	-2	8.3057	-1.3234	N-linked glycosylation
19399	19401	67.2153	MVSHHNLTTGATLINEQWLLTTAK	gi|186910296, gi|45580723, gi|4826762, gi|767989864, gi|767989866, gi|767989868	2245.8	N5H4F0S2G0	989.446	4941.19	5	-2	8.1403	0.54843	N-linked glycosylation
16890	16893	60.2735	MVSHHNLTTGATLINEQWLLTTAK	gi|186910296, gi|45580723, gi|4826762, gi|767989864, gi|767989866, gi|767989868	1954.7	N5H4F0S1G0	1163.78	4650.08	4	-2	8.1095	-2.5117	N-linked glycosylation
20959	20960	71.542	MVSHHNLTTGATLINEQWLLTTAK	gi|186910296, gi|45580723, gi|4826762, gi|767989864, gi|767989866, gi|767989868	1913.68	N4H5F0S1G0	1149.52	4593.05	4	-2	7.2723	-3.5994	N-linked glycosylation
22259	22265	75.1625	MVSHHNLTTGATLINEQWLLTTAK	gi|186910296, gi|45580723, gi|4826762, gi|767989864, gi|767989866, gi|767989868	2569.9	N5H6F0S2G0	1051.47	5249.3	5	-4	7.248	0.53483	N-linked glycosylation
21141	21144	72.0528	MVSHHNLTTGATLINEQWLLTTAK	gi|186910296, gi|45580723, gi|4826762, gi|767989864, gi|767989866, gi|767989868	1913.68	N4H5F0S1G0	1149.77	4593.06	4	-3	7.2174	-2.31	N-linked glycosylation
23663	23667	79.057	MVSHHNLTTGATLINEQWLLTTAK	gi|186910296, gi|45580723, gi|4826762, gi|767989864, gi|767989866, gi|767989868	2205.79	N4H5F2S1G0	1222.54	4885.14	4	-2	7.2034	-8.3976	N-linked glycosylation
24820	24826	82.272	MVSHHNLTTGATLINEQWLLTTAK	gi|186910296, gi|45580723, gi|4826762, gi|767989864, gi|767989866, gi|767989868	1955.72	N5H4F2S0G0	1160.53	4635.08	4	-4	7.1119	-7.2535	N-linked glycosylation
18281	18288	64.1413	MVSHHNLTTGATLINEQWLLTTAK	gi|186910296, gi|45580723, gi|4826762, gi|767989864, gi|767989866, gi|767989868	1622.58	N4H5F0S0G0	1076.75	4301.97	4	-2	6.2642	-1.5299	N-linked glycosylation
19074	19078	66.3227	MVSHHNLTTGATLINEQWLLTTAK	gi|186910296, gi|45580723, gi|4826762, gi|767989864, gi|767989866, gi|767989868	2278.81	N5H6F0S1G0	1245.05	4974.18	4	-3	6.1839	-3.1471	N-linked glycosylation
19672	19680	67.9898	MVSHHNLTTGATLINEQWLLTTAK	gi|186910296, gi|45580723, gi|4826762, gi|767989864, gi|767989866, gi|767989868	1913.68	N4H5F0S1G0	1532.36	4593.07	3	-2	5.3373	-0.59349	N-linked glycosylation
19503	19514	67.527	MVSHHNLTTGATLINEQWLLTTAK	gi|186910296, gi|45580723, gi|4826762, gi|767989864, gi|767989866, gi|767989868	2424.87	N5H6F1S1G0	1277.32	5104.26	4	-2	5.3074	-0.59149	N-linked glycosylation
12535	12542	48.2557	NFTENDLLVR	gi|4503635	1622.58	N4H5F0S0G0	948.742	2843.21	3	-1	6.2056	-0.22918	N-linked glycosylation
7257	7265	33.7833	NHSCEPCQTLAVR	gi|145275213, gi|767938145, gi|767938147	2204.77	N4H5F0S2G0	945.124	3776.47	4	-1	8.3618	-2.7722	N-linked glycosylation
7257	7263	33.7782	NHSCEPCQTLAVR	gi|145275213, gi|767938145, gi|767938147	2204.77	N4H5F0S2G0	1259.5	3776.48	3	0	7.3851	1.3195	N-linked glycosylation
26575	26580	87.1543	NISDGFDGIPDNVDAALALPAHSYSGR	gi|88853069	1913.68	N4H5F0S1G0	1172.76	4686	4	-2	10.3739	0.55876	N-linked glycosylation
30033	30042	96.8277	NISDGFDGIPDNVDAALALPAHSYSGR	gi|88853069	2204.77	N4H5F0S2G0	1245.53	4977.09	4	-2	6.3161	-0.099755	N-linked glycosylation
6685	6688	32.1952	NLFLNHSENATAK	gi|186910296, gi|45580723, gi|4826762, gi|767989864, gi|767989866, gi|767989868	1913.68	N4H5F0S1G0	1125.48	3372.41	3	-2	8.4518	-1.2315	N-linked glycosylation
6490	6499	31.6733	NLFLNHSENATAK	gi|186910296, gi|45580723, gi|4826762, gi|767989864, gi|767989866, gi|767989868	1913.68	N4H5F0S1G0	1124.81	3372.41	3	0	7.4335	-0.94318	N-linked glycosylation
20686	20689	70.7892	NLSMPLLPADFHK	gi|73858566	1913.68	N4H5F0S1G0	1133.49	3396.45	3	-2	9.4661	-0.52749	N-linked glycosylation
25106	25117	83.081	NLSMPLLPADFHK	gi|73858566	2204.77	N4H5F0S2G0	1229.85	3687.55	3	0	8.46	-0.37168	N-linked glycosylation
16942	16951	60.4337	NLSMPLLPADFHK	gi|73858566	1622.58	N4H5F0S0G0	1035.79	3105.36	3	0	6.4454	-1.0297	N-linked glycosylation
12158	12170	47.2325	NLSMPLLPADFHK	gi|73858566	1622.58	N4H5F0S0G0	1041.46	3121.35	3	-1	5.3111	-0.39177	N-linked glycosylation
10533	10539	42.7665	NNATVHEQVGGPSLTSDLQAQSK	gi|88853069	1913.68	N4H5F0S1G0	1074.72	4294.83	4	-1	11.3802	-2.9558	N-linked glycosylation
13601	13606	51.18	NNATVHEQVGGPSLTSDLQAQSK	gi|88853069	2204.77	N4H5F0S2G0	1147.74	4585.94	4	-2	9.3513	-0.98476	N-linked glycosylation
8141	8147	36.207	NNATVHEQVGGPSLTSDLQAQSK	gi|88853069	1622.58	N4H5F0S0G0	1001.94	4003.75	4	-1	9.2674	0.16833	N-linked glycosylation
15707	15708	56.9925	NTTCQDLQIEVTVK	gi|178557739, gi|338858017, gi|356582273, gi|67190748, gi|768052592	1913.68	N4H5F0S1G0	1188.5	3562.49	3	-1	10.3049	-2.5801	N-linked glycosylation
11729	11736	46.0388	NTTCQDLQIEVTVK	gi|178557739, gi|338858017, gi|356582273, gi|67190748, gi|768052592	1622.58	N4H5F0S0G0	1091.47	3271.4	3	-1	8.3203	-1.7456	N-linked glycosylation
20335	20347	69.8342	NTTCQDLQIEVTVK	gi|178557739, gi|338858017, gi|356582273, gi|67190748, gi|768052592	2204.77	N4H5F0S2G0	1285.54	3853.59	3	-1	6.2725	-2.0531	N-linked glycosylation
20452	20463	70.1572	NTTCQDLQIEVTVK	gi|178557739, gi|338858017, gi|356582273, gi|67190748, gi|768052592	2204.77	N4H5F0S2G0	964.656	3853.59	4	-2	6.209	-0.36109	N-linked glycosylation
20985	20987	71.6168	QQQHLFGSNVTDCSGNFCLFR	gi|4557871, gi|767927446	1913.68	N4H5F0S1G0	1108.45	4428.79	4	-2	10.2139	-2.8301	N-linked glycosylation
20790	20799	71.094	QQQHLFGSNVTDCSGNFCLFR	gi|4557871, gi|767927446	1913.68	N4H5F0S1G0	1108.46	4428.79	4	-2	8.1683	-1.7276	N-linked glycosylation
24521	24525	81.434	QQQHLFGSNVTDCSGNFCLFR	gi|4557871, gi|767927446	2204.77	N4H5F0S2G0	1181.23	4719.9	4	-2	7.137	0.40875	N-linked glycosylation
24599	24603	81.6507	QQQHLFGSNVTDCSGNFCLFR	gi|4557871, gi|767927446	2204.77	N4H5F0S2G0	1181.48	4719.89	4	-3	7.1359	-1.7504	N-linked glycosylation
6932	6939	32.8853	SCDTPPPCPR	gi|9857757	947.323	N1H1F0S2G0	711.946	2133.82	3	0	13.3646	0.37512	O-linked glycosylation
9558	9560	40.0888	SHAPEVITSSPL	gi|4503625	365.132	N1H1F0S0G0	801.89	1602.77	2	0	12.4432	-1.3127	O-linked glycosylation
22558	22559	75.9807	SLGNVNFTVSAEALESQELCGTEVPSVPEHGR	gi|578822814, gi|66932947	1216.42	N2H5F0S0G0	1158.27	4630.06	4	0	29.4573	1.0754	N-linked glycosylation
22753	22755	76.5252	SLGNVNFTVSAEALESQELCGTEVPSVPEHGR	gi|578822814, gi|66932947	1216.42	N2H5F0S0G0	1158.77	4630.05	4	-2	19.5529	0.78632	N-linked glycosylation
22428	22429	75.62	SLGNVNFTVSAEALESQELCGTEVPSVPEHGR	gi|578822814, gi|66932947	1581.56	N3H6F0S0G0	1250.05	4995.17	4	-2	13.4691	-1.69	N-linked glycosylation
22948	22955	77.0807	SLGNVNFTVSAEALESQELCGTEVPSVPEHGR	gi|578822814, gi|66932947	1216.42	N2H5F0S0G0	1158.77	4630.05	4	-2	12.3787	-0.057348	N-linked glycosylation
22389	22398	75.5317	SLGNVNFTVSAEALESQELCGTEVPSVPEHGR	gi|578822814, gi|66932947	1378.48	N2H6F0S0G0	1199.28	4792.1	4	-2	11.4447	-0.069104	N-linked glycosylation
22597	22598	76.0885	SLGNVNFTVSAEALESQELCGTEVPSVPEHGR	gi|578822814, gi|66932947	1216.42	N2H5F0S0G0	1544.69	4630.05	3	-2	10.5991	-1.1883	N-linked glycosylation
22376	22384	75.4928	SLGNVNFTVSAEALESQELCGTEVPSVPEHGR	gi|578822814, gi|66932947	1419.5	N3H5F0S0G0	1209.79	4833.14	4	-3	10.4941	1.0077	N-linked glycosylation
22363	22370	75.4542	SLGNVNFTVSAEALESQELCGTEVPSVPEHGR	gi|578822814, gi|66932947	1216.42	N2H5F0S0G0	1158.77	4630.06	4	-2	10.4777	1.5245	N-linked glycosylation
23559	23564	78.7703	SLGNVNFTVSAEALESQELCGTEVPSVPEHGR	gi|578822814, gi|66932947	1216.42	N2H5F0S0G0	1159.02	4630.03	4	-3	10.4682	-3.9457	N-linked glycosylation
24989	24996	82.7443	SLGNVNFTVSAEALESQELCGTEVPSVPEHGR	gi|578822814, gi|66932947	1913.68	N4H5F0S1G0	1066.67	5327.31	5	-2	10.2267	1.2904	N-linked glycosylation
23143	23149	77.6215	SLGNVNFTVSAEALESQELCGTEVPSVPEHGR	gi|578822814, gi|66932947	1216.42	N2H5F0S0G0	1158.77	4630.04	4	-2	9.4482	-3.432	N-linked glycosylation
25223	25228	83.3905	SLGNVNFTVSAEALESQELCGTEVPSVPEHGR	gi|578822814, gi|66932947	1872.65	N3H6F0S1G0	1322.83	5286.27	4	-2	8.4379	-1.1702	N-linked glycosylation
25028	25035	82.8523	SLGNVNFTVSAEALESQELCGTEVPSVPEHGR	gi|578822814, gi|66932947	1872.65	N3H6F0S1G0	1323.08	5286.27	4	-3	8.4337	-1.5277	N-linked glycosylation
22233	22241	75.0948	SLGNVNFTVSAEALESQELCGTEVPSVPEHGR	gi|578822814, gi|66932947	1581.56	N3H6F0S0G0	1250.05	4995.18	4	-2	7.4889	-0.90804	N-linked glycosylation
22402	22411	75.568	SLGNVNFTVSAEALESQELCGTEVPSVPEHGR	gi|578822814, gi|66932947	1216.42	N2H5F0S0G0	1544.69	4630.04	3	-2	6.4871	-2.1375	N-linked glycosylation
22519	22524	75.8825	SLGNVNFTVSAEALESQELCGTEVPSVPEHGR	gi|578822814, gi|66932947	1257.45	N3H4F0S0G0	1169.03	4671.08	4	-2	6.4125	-0.10669	N-linked glycosylation
25184	25196	83.3002	SLGNVNFTVSAEALESQELCGTEVPSVPEHGR	gi|578822814, gi|66932947	1751.62	N4H4F0S1G0	1292.82	5165.25	4	-3	6.3826	0.10571	N-linked glycosylation
22571	22577	76.0297	SLGNVNFTVSAEALESQELCGTEVPSVPEHGR	gi|578822814, gi|66932947	1419.5	N3H5F0S0G0	1209.79	4833.13	4	-3	6.3587	0.30049	N-linked glycosylation
22285	22290	75.2322	SLGNVNFTVSAEALESQELCGTEVPSVPEHGR	gi|578822814, gi|66932947	1622.58	N4H5F0S0G0	1008.45	5036.21	5	-2	6.3427	-0.12525	N-linked glycosylation
22194	22199	74.978	SLGNVNFTVSAEALESQELCGTEVPSVPEHGR	gi|578822814, gi|66932947	1622.58	N4H5F0S0G0	1260.31	5036.2	4	-2	5.4286	-1.3347	N-linked glycosylation
22896	22902	76.9335	SLGNVNFTVSAEALESQELCGTEVPSVPEHGR	gi|578822814, gi|66932947	1581.56	N3H6F0S0G0	1250.3	4995.17	4	-3	5.3451	-3.1437	N-linked glycosylation
22389	22397	75.5292	SLGNVNFTVSAEALESQELCGTEVPSVPEHGR	gi|578822814, gi|66932947	1460.53	N4H4F0S0G0	1219.55	4874.17	4	-1	5.3055	1.727	N-linked glycosylation
32451	32460	103.613	SLTFNETYQDISELVYGAK	gi|4502261, gi|530364787	1913.68	N4H5F0S1G0	1023.94	4091.73	4	-1	8.1629	-1.4516	N-linked glycosylation
21947	21957	74.3055	SPYYNVSDEISFHCYDGYTLR	gi|67782358	1913.68	N4H5F0S1G0	1126.21	4499.81	4	-2	9.2945	1.0028	N-linked glycosylation
8258	8269	36.5438	SVSEINPTTQMK	gi|156231037	947.323	N1H1F0S2G0	766.665	2297.98	3	0	13.2524	-0.21232	O-linked glycosylation
14472	14473	53.5785	SWPAVGNCSSALR	gi|11321561, gi|530395269	1913.68	N4H5F0S1G0	1106.79	3318.34	3	0	6.3387	-0.99202	N-linked glycosylation
18931	18935	65.9265	SWPAVGNCSSALR	gi|11321561, gi|530395269	2204.77	N4H5F0S2G0	903.368	3609.45	4	-1	6.2474	0.97843	N-linked glycosylation
15902	15903	57.5298	TFVLSALQPSPTHSSSNTQR	gi|156119625, gi|261878614, gi|261878616, gi|261878618	656.228	N1H1F0S1G0	938.778	2814.32	3	0	21.3545	0.087371	O-linked glycosylation
11937	11938	46.5973	TFVLSALQPSPTHSSSNTQR	gi|156119625, gi|261878614, gi|261878616, gi|261878618	365.132	N1H1F0S0G0	842.079	2523.22	3	-1	20.3842	-1.6909	O-linked glycosylation
15707	15717	57.0158	TFVLSALQPSPTHSSSNTQR	gi|156119625, gi|261878614, gi|261878616, gi|261878618	656.228	N1H1F0S1G0	939.115	2814.33	3	-1	18.3476	3.5581	O-linked glycosylation
11742	11753	46.0848	TFVLSALQPSPTHSSSNTQR	gi|156119625, gi|261878614, gi|261878616, gi|261878618	365.132	N1H1F0S0G0	841.745	2523.22	3	0	14.3957	-0.55485	O-linked glycosylation
12132	12135	47.1377	TFVLSALQPSPTHSSSNTQR	gi|156119625, gi|261878614, gi|261878616, gi|261878618	365.132	N1H1F0S0G0	842.412	2523.21	3	-2	12.3618	-2.9721	O-linked glycosylation
4099	4107	25.1038	TPLPPTSAHGNVAEGETKPD	gi|11321561, gi|530395269	365.132	N1H1F0S0G0	795.043	2383.11	3	0	23.2076	-0.462	O-linked glycosylation
6438	6446	31.5298	TPLPPTSAHGNVAEGETKPD	gi|11321561, gi|530395269	656.228	N1H1F0S1G0	892.408	2674.2	3	-1	13.2233	-2.6484	O-linked glycosylation
6633	6640	32.0618	TPLPPTSAHGNVAEGETKPD	gi|11321561, gi|530395269	656.228	N1H1F0S1G0	892.074	2674.21	3	0	13.2221	-1.3711	O-linked glycosylation
7647	7649	34.8368	TPLPPTSAHGNVAEGETKPDPDVTER	gi|11321561, gi|530395269	656.228	N1H1F0S1G0	843.643	3371.55	4	0	26.2847	-0.55567	O-linked glycosylation
6919	6920	32.8343	TPLPPTSAHGNVAEGETKPDPDVTER	gi|11321561, gi|530395269	1021.36	N2H2F0S1G0	934.926	3736.68	4	0	25.2975	-0.86015	O-linked glycosylation
4099	4110	25.1108	TPLPPTSAHGNVAEGETKPDPDVTER	gi|11321561, gi|530395269	1095.4	N3H3F0S0G0	953.937	3810.72	4	-2	22.3254	-0.15252	O-linked glycosylation
7842	7844	35.3743	TPLPPTSAHGNVAEGETKPDPDVTER	gi|11321561, gi|530395269	656.228	N1H1F0S1G0	843.643	3371.55	4	0	22.2883	-0.19361	O-linked glycosylation
5879	5881	29.9813	TPLPPTSAHGNVAEGETKPDPDVTER	gi|11321561, gi|530395269	365.132	N1H1F0S0G0	771.118	3080.45	4	-1	22.2661	-2.9845	O-linked glycosylation
5684	5686	29.442	TPLPPTSAHGNVAEGETKPDPDVTER	gi|11321561, gi|530395269	365.132	N1H1F0S0G0	770.868	3080.45	4	0	21.294	-1.8161	O-linked glycosylation
6724	6725	32.2972	TPLPPTSAHGNVAEGETKPDPDVTER	gi|11321561, gi|530395269	1021.36	N2H2F0S1G0	935.428	3736.68	4	-2	20.293	-0.49968	O-linked glycosylation
5606	5611	29.2367	TPLPPTSAHGNVAEGETKPDPDVTER	gi|11321561, gi|530395269	365.132	N1H1F0S0G0	1027.49	3080.46	3	0	18.4149	1.16	O-linked glycosylation
4735	4736	26.8365	TPLPPTSAHGNVAEGETKPDPDVTER	gi|11321561, gi|530395269	730.264	N2H2F0S0G0	862.405	3445.59	4	-1	18.313	1.4066	O-linked glycosylation
7114	7115	33.3718	TPLPPTSAHGNVAEGETKPDPDVTER	gi|11321561, gi|530395269	1021.36	N2H2F0S1G0	935.176	3736.68	4	-1	17.3218	-1.0393	O-linked glycosylation
9090	9091	38.805	TPLPPTSAHGNVAEGETKPDPDVTER	gi|11321561, gi|530395269	1312.46	N2H2F0S2G0	1008.2	4027.78	4	-2	17.3192	0.096609	O-linked glycosylation
5749	5750	29.619	TPLPPTSAHGNVAEGETKPDPDVTER	gi|11321561, gi|530395269	1386.49	N3H3F0S1G0	1026.46	4101.82	4	-1	16.3799	0.80962	O-linked glycosylation
5125	5127	27.9017	TPLPPTSAHGNVAEGETKPDPDVTER	gi|11321561, gi|530395269	730.264	N2H2F0S0G0	862.655	3445.59	4	-2	15.3367	0.99982	O-linked glycosylation
8037	8041	35.9148	TPLPPTSAHGNVAEGETKPDPDVTER	gi|11321561, gi|530395269	656.228	N1H1F0S1G0	843.644	3371.55	4	0	15.325	0.16845	O-linked glycosylation
7647	7656	34.8545	TPLPPTSAHGNVAEGETKPDPDVTER	gi|11321561, gi|530395269	656.228	N1H1F0S1G0	1124.52	3371.55	3	0	14.4203	-0.73298	O-linked glycosylation
7842	7852	35.3943	TPLPPTSAHGNVAEGETKPDPDVTER	gi|11321561, gi|530395269	656.228	N1H1F0S1G0	1124.52	3371.56	3	0	14.4032	2.4169	O-linked glycosylation
7699	7710	35.0037	TPLPPTSAHGNVAEGETKPDPDVTER	gi|11321561, gi|530395269	1677.59	N3H3F0S2G0	1099.49	4392.91	4	-2	13.4135	0.06128	O-linked glycosylation
5749	5751	29.6215	TPLPPTSAHGNVAEGETKPDPDVTER	gi|11321561, gi|530395269	365.132	N1H1F0S0G0	1028.16	3080.46	3	-2	13.3867	0.36879	O-linked glycosylation
7894	7898	35.5217	TPLPPTSAHGNVAEGETKPDPDVTER	gi|11321561, gi|530395269	1677.59	N3H3F0S2G0	1099.49	4392.91	4	-2	12.3627	0.39474	O-linked glycosylation
5489	5495	28.9168	TPLPPTSAHGNVAEGETKPDPDVTER	gi|11321561, gi|530395269	365.132	N1H1F0S0G0	771.373	3080.46	4	-2	12.3408	2.1083	O-linked glycosylation
4540	4542	26.3015	TPLPPTSAHGNVAEGETKPDPDVTER	gi|11321561, gi|530395269	730.264	N2H2F0S0G0	862.402	3445.58	4	-1	12.3317	-1.6402	O-linked glycosylation
9818	9824	40.8128	TPLPPTSAHGNVAEGETKPDPDVTER	gi|11321561, gi|530395269	947.323	N1H1F0S2G0	916.67	3662.65	4	-1	12.2498	1.9881	O-linked glycosylation
4151	4158	25.238	TPLPPTSAHGNVAEGETKPDPDVTER	gi|11321561, gi|530395269	730.264	N2H2F0S0G0	862.404	3445.59	4	-1	11.3641	0.27294	O-linked glycosylation
8882	8894	38.2623	TPLPPTSAHGNVAEGETKPDPDVTER	gi|11321561, gi|530395269	1312.46	N2H2F0S2G0	1007.95	4027.77	4	-1	11.3206	-2.4649	O-linked glycosylation
7322	7331	33.9642	TPLPPTSAHGNVAEGETKPDPDVTER	gi|11321561, gi|530395269	1021.36	N2H2F0S1G0	935.426	3736.67	4	-2	10.3377	-2.7864	O-linked glycosylation
5320	5324	28.4457	TPLPPTSAHGNVAEGETKPDPDVTER	gi|11321561, gi|530395269	730.264	N2H2F0S0G0	862.404	3445.59	4	-1	10.3091	0.83979	O-linked glycosylation
7452	7459	34.3172	TPLPPTSAHGNVAEGETKPDPDVTER	gi|11321561, gi|530395269	656.228	N1H1F0S1G0	844.145	3371.55	4	-2	10.3052	-0.011337	O-linked glycosylation
8245	8254	36.5022	TPLPPTSAHGNVAEGETKPDPDVTER	gi|11321561, gi|530395269	656.228	N1H1F0S1G0	844.392	3371.54	4	-3	9.3352	-4.2649	O-linked glycosylation
6945	6956	32.9312	TPLPPTSAHGNVAEGETKPDPDVTER	gi|11321561, gi|530395269	1021.36	N2H2F0S1G0	1246.57	3736.68	3	-1	8.4933	-1.6566	O-linked glycosylation
4345	4349	25.7662	TPLPPTSAHGNVAEGETKPDPDVTER	gi|11321561, gi|530395269	730.264	N2H2F0S0G0	862.404	3445.59	4	-1	8.3183	0.76893	O-linked glycosylation
10988	10992	44.005	TTPPTTATPIR	gi|530370065	656.228	N1H1F0S1G0	906.43	1811.85	2	0	6.3304	-7.3343	O-linked glycosylation
7218	7230	33.6858	TTPPTTATPIR	gi|530370065	365.132	N1H1F0S0G0	760.883	1520.76	2	0	6.2561	-7.894	O-linked glycosylation
15785	15787	57.2102	TVLTPATNHMGNVTFTIPANR	gi|115298678	1378.48	N2H6F0S0G0	1212.22	3633.64	3	-1	16.4002	0.87616	N-linked glycosylation
15616	15620	56.7498	TVLTPATNHMGNVTFTIPANR	gi|115298678	1378.48	N2H6F0S0G0	909.917	3633.63	4	-3	15.3566	-0.90665	N-linked glycosylation
15590	15593	56.6762	TVLTPATNHMGNVTFTIPANR	gi|115298678	1378.48	N2H6F0S0G0	1212.22	3633.64	3	-1	13.4114	0.87616	N-linked glycosylation
15720	15726	57.0415	TVLTPATNHMGNVTFTIPANR	gi|115298678	1216.42	N2H5F0S0G0	1158.54	3471.58	3	-2	13.3792	0.32122	N-linked glycosylation
15564	15575	56.6252	TVLTPATNHMGNVTFTIPANR	gi|115298678	1540.53	N2H7F0S0G0	1266.57	3795.7	3	-2	12.4267	2.6712	N-linked glycosylation
15590	15600	56.694	TVLTPATNHMGNVTFTIPANR	gi|115298678	1378.48	N2H6F0S0G0	909.665	3633.63	4	-2	12.3653	-1.4615	N-linked glycosylation
12678	12686	48.6493	TVLTPATNHMGNVTFTIPANR	gi|115298678	1378.48	N2H6F0S0G0	913.414	3649.63	4	-1	11.3691	-0.4804	N-linked glycosylation
12639	12647	48.5428	TVLTPATNHMGNVTFTIPANR	gi|115298678	1378.48	N2H6F0S0G0	1217.88	3649.63	3	-2	10.3985	-0.49311	N-linked glycosylation
8869	8876	38.2137	TVLTPATNHMGNVTFTIPANR	gi|115298678	1419.5	N3H5F0S0G0	923.671	3690.66	4	-1	10.1731	-0.40584	N-linked glycosylation
14407	14413	53.4132	TVLTPATNHMGNVTFTIPANR	gi|115298678	1378.48	N2H6F0S0G0	1217.55	3649.62	3	-1	9.3181	-3.621	N-linked glycosylation
12834	12840	49.0722	TVLTPATNHMGNVTFTIPANR	gi|115298678	1378.48	N2H6F0S0G0	1217.55	3649.63	3	-1	8.3147	-1.3131	N-linked glycosylation
17787	17788	62.7533	TVVQPSVGAAAGPVVPPCPGR	gi|156523970	656.228	N1H1F0S1G0	891.438	2672.3	3	0	24.5009	0.040797	O-linked glycosylation
17761	17768	62.6967	TVVQPSVGAAAGPVVPPCPGR	gi|156523970	673.243	N1H2F1S0G0	897.447	2689.32	3	-1	22.576	2.7721	O-linked glycosylation
14420	14431	53.4612	TVVQPSVGAAAGPVVPPCPGR	gi|156523970	365.132	N1H1F0S0G0	1191.1	2381.2	2	0	16.674	-1.6911	O-linked glycosylation
6828	6840	32.6127	VATTVISK	gi|73858568, gi|73858570	1312.46	N2H2F0S2G0	710.989	2130.95	3	0	10.3607	-1.3693	O-linked glycosylation
20010	20012	68.9068	VCQDCPLLAPLNDTR	gi|156523970	1913.68	N4H5F0S1G0	1229.51	3685.52	3	-1	12.2657	-0.073636	N-linked glycosylation
19880	19890	68.5687	VCQDCPLLAPLNDTR	gi|156523970	1913.68	N4H5F0S1G0	922.887	3685.52	4	-3	9.1621	-2.1957	N-linked glycosylation
14199	14204	52.8348	VFHIHNESWVLLTPK	gi|21450861, gi|21450863, gi|333440461, gi|530426019, gi|768014600	1216.42	N2H5F0S0G0	759.857	3036.41	4	0	10.4449	-1.2258	N-linked glycosylation
20322	20334	69.798	VIDFNCTTSSVSSALANTK	gi|4504489, gi|530374534	1913.68	N4H5F0S1G0	982.917	3928.64	4	0	17.3524	-2.4213	N-linked glycosylation
20309	20321	69.762	VIDFNCTTSSVSSALANTK	gi|4504489, gi|530374534	1913.68	N4H5F0S1G0	1310.89	3928.66	3	-2	10.3402	0.62795	N-linked glycosylation
16955	16967	60.478	VIDFNCTTSSVSSALANTK	gi|4504489, gi|530374534	1622.58	N4H5F0S0G0	1213.53	3637.56	3	-1	8.2214	0.71174	N-linked glycosylation
9701	9712	40.5033	VLNFTTK	gi|169636415, gi|189242612, gi|530378932, gi|578809986, gi|767934622, gi|767934625, gi|767934627, gi|767934629, gi|767934631, gi|767934633, gi|767934635, gi|767934637	1913.68	N4H5F0S1G0	913.055	2736.15	3	-1	5.4208	-0.8976	N-linked glycosylation
38741	38747	122.005	VSNQTLSLFFTVLQDVPVR	gi|578822814, gi|66932947	2204.77	N4H5F0S2G0	1093.25	4367.95	4	-2	17.4985	-0.80009	N-linked glycosylation
33166	33174	105.62	VSNQTLSLFFTVLQDVPVR	gi|578822814, gi|66932947	1768.64	N4H5F1S0G0	984.464	3931.82	4	-3	15.5546	0.63972	N-linked glycosylation
37144	37145	117.05	VSNQTLSLFFTVLQDVPVR	gi|578822814, gi|66932947	2059.73	N4H5F1S1G0	1056.99	4222.92	4	-2	11.4903	1.115	N-linked glycosylation
33205	33216	105.737	VSNQTLSLFFTVLQDVPVR	gi|578822814, gi|66932947	1622.58	N4H5F0S0G0	947.699	3785.77	4	-2	11.4745	0.59345	N-linked glycosylation
37044	37045	116.717	VSNQTLSLFFTVLQDVPVR	gi|578822814, gi|66932947	1913.68	N4H5F0S1G0	1019.97	4076.87	4	0	11.4611	2.93	N-linked glycosylation
36868	36873	116.209	VSNQTLSLFFTVLQDVPVR	gi|578822814, gi|66932947	1913.68	N4H5F0S1G0	1020.22	4076.85	4	-1	11.3462	-0.88717	N-linked glycosylation
38754	38766	122.057	VSNQTLSLFFTVLQDVPVR	gi|578822814, gi|66932947	2350.79	N2H12F0S0G0	1129.76	4514.02	4	-2	10.358	9.8309	N-linked glycosylation
33166	33170	105.61	VSNQTLSLFFTVLQDVPVR	gi|578822814, gi|66932947	1768.64	N4H5F1S0G0	1311.95	3931.83	3	-2	8.3627	1.7756	N-linked glycosylation
33153	33163	105.589	VSNQTLSLFFTVLQDVPVR	gi|578822814, gi|66932947	1768.64	N4H5F1S0G0	1311.62	3931.85	3	-1	7.3274	6.4165	N-linked glycosylation
33192	33196	105.682	VSNQTLSLFFTVLQDVPVR	gi|578822814, gi|66932947	1622.58	N4H5F0S0G0	1263.26	3785.76	3	-2	6.3027	0.24207	N-linked glycosylation
37044	37046	116.72	VSNQTLSLFFTVLQDVPVR	gi|578822814, gi|66932947	1913.68	N4H5F0S1G0	1360.29	4076.86	3	-2	6.2344	-0.7189	N-linked glycosylation
36868	36871	116.204	VSNQTLSLFFTVLQDVPVR	gi|578822814, gi|66932947	1913.68	N4H5F0S1G0	1360.3	4076.88	3	-2	6.2312	4.2216	N-linked glycosylation
36881	36884	116.241	VTQNLTLIEESLTSEFIHDIDR	gi|39725934	2204.77	N4H5F0S2G0	1196.03	4778.09	4	-3	6.3031	1.0006	N-linked glycosylation
18970	18971	66.0267	VVLHPNYSQVDIGLIK	gi|186910296, gi|4826762, gi|767989864	1913.68	N4H5F0S1G0	1237.24	3708.69	3	-1	21.3425	0.41793	N-linked glycosylation
19165	19166	66.5665	VVLHPNYSQVDIGLIK	gi|186910296, gi|4826762, gi|767989864	1913.68	N4H5F0S1G0	1236.9	3708.69	3	0	20.3216	-0.48779	N-linked glycosylation
15941	15942	57.6373	VVLHPNYSQVDIGLIK	gi|186910296, gi|4826762, gi|767989864	1622.58	N4H5F0S0G0	1139.87	3417.59	3	0	18.3487	-0.1537	N-linked glycosylation
18983	18984	66.0625	VVLHPNYSQVDIGLIK	gi|186910296, gi|4826762, gi|767989864	1913.68	N4H5F0S1G0	928.429	3708.69	4	-2	18.2867	-0.65461	N-linked glycosylation
22441	22443	75.6583	VVLHPNYSQVDIGLIK	gi|186910296, gi|4826762, gi|767989864	2204.77	N4H5F0S2G0	1334.6	3999.78	3	-2	17.3035	-1.1995	N-linked glycosylation
22636	22638	76.1992	VVLHPNYSQVDIGLIK	gi|186910296, gi|4826762, gi|767989864	2204.77	N4H5F0S2G0	1334.6	3999.78	3	-2	16.2964	-0.65013	N-linked glycosylation
22441	22442	75.656	VVLHPNYSQVDIGLIK	gi|186910296, gi|4826762, gi|767989864	2204.77	N4H5F0S2G0	1001.2	3999.78	4	-2	16.2568	-0.53119	N-linked glycosylation
22636	22639	76.2018	VVLHPNYSQVDIGLIK	gi|186910296, gi|4826762, gi|767989864	2204.77	N4H5F0S2G0	1001.2	3999.78	4	-2	16.2487	0.14024	N-linked glycosylation
22181	22182	74.9313	VVLHPNYSQVDIGLIK	gi|186910296, gi|4826762, gi|767989864	2569.9	N5H6F0S2G0	1091.97	4364.88	4	0	16.1802	-9.3805	N-linked glycosylation
15746	15749	57.1052	VVLHPNYSQVDIGLIK	gi|186910296, gi|4826762, gi|767989864	1622.58	N4H5F0S0G0	1139.87	3417.6	3	0	15.3231	1.8822	N-linked glycosylation
19178	19179	66.6025	VVLHPNYSQVDIGLIK	gi|186910296, gi|4826762, gi|767989864	1913.68	N4H5F0S1G0	927.927	3708.69	4	0	15.3058	-0.75449	N-linked glycosylation
18749	18750	65.4167	VVLHPNYSQVDIGLIK	gi|186910296, gi|4826762, gi|767989864	2278.81	N5H6F0S1G0	1359.62	4073.84	3	-3	15.1576	3.4384	N-linked glycosylation
18749	18752	65.4213	VVLHPNYSQVDIGLIK	gi|186910296, gi|4826762, gi|767989864	2278.81	N5H6F0S1G0	1019.71	4073.82	4	-2	14.2824	-0.56545	N-linked glycosylation
18788	18793	65.5343	VVLHPNYSQVDIGLIK	gi|186910296, gi|4826762, gi|767989864	1913.68	N4H5F0S1G0	928.18	3708.69	4	-1	14.2684	1.0399	N-linked glycosylation
15668	15669	56.885	VVLHPNYSQVDIGLIK	gi|186910296, gi|4826762, gi|767989864	1987.71	N5H6F0S0G0	946.44	3782.74	4	0	14.2494	2.5046	N-linked glycosylation
22363	22364	75.4387	VVLHPNYSQVDIGLIK	gi|186910296, gi|4826762, gi|767989864	2569.9	N5H6F0S2G0	1091.98	4364.91	4	0	11.2402	-1.2143	N-linked glycosylation
16136	16138	58.1808	VVLHPNYSQVDIGLIK	gi|186910296, gi|4826762, gi|767989864	1622.58	N4H5F0S0G0	1139.87	3417.6	3	0	10.3574	0.70354	N-linked glycosylation
19373	19375	67.1432	VVLHPNYSQVDIGLIK	gi|186910296, gi|4826762, gi|767989864	1913.68	N4H5F0S1G0	928.43	3708.69	4	-2	10.3067	0.39866	N-linked glycosylation
19360	19363	67.1098	VVLHPNYSQVDIGLIK	gi|186910296, gi|4826762, gi|767989864	1913.68	N4H5F0S1G0	1237.24	3708.69	3	-1	10.2479	0.41793	N-linked glycosylation
19763	19764	68.2242	VVLHPNYSQVDIGLIK	gi|186910296, gi|4826762, gi|767989864	1914.7	N4H5F2S0G0	928.425	3709.67	4	-1	10.1608	-9.9218	N-linked glycosylation
22194	22196	74.9702	VVLHPNYSQVDIGLIK	gi|186910296, gi|4826762, gi|767989864	2569.9	N5H6F0S2G0	1456.31	4364.91	3	-2	9.2818	-0.70712	N-linked glycosylation
18554	18558	64.8883	VVLHPNYSQVDIGLIK	gi|186910296, gi|4826762, gi|767989864	2278.81	N5H6F0S1G0	1019.21	4073.82	4	0	9.2654	0.062778	N-linked glycosylation
22831	22834	76.7448	VVLHPNYSQVDIGLIK	gi|186910296, gi|4826762, gi|767989864	2204.77	N4H5F0S2G0	1000.95	3999.78	4	-1	9.2571	-0.60801	N-linked glycosylation
26523	26525	87.0012	VVLHPNYSQVDIGLIK	gi|186910296, gi|4826762, gi|767989864	2861	N5H6F0S3G0	1165.26	4656.01	4	-2	9.224	0.422	N-linked glycosylation
22311	22323	75.3227	VVLHPNYSQVDIGLIK	gi|186910296, gi|4826762, gi|767989864	2204.77	N4H5F0S2G0	800.963	3999.78	5	-1	9.2236	-0.64166	N-linked glycosylation
18944	18948	65.9623	VVLHPNYSQVDIGLIK	gi|186910296, gi|4826762, gi|767989864	2278.81	N5H6F0S1G0	1019.71	4073.82	4	-2	8.2529	-0.026086	N-linked glycosylation
22246	22251	75.1238	VVLHPNYSQVDIGLIK	gi|186910296, gi|4826762, gi|767989864	2204.77	N4H5F0S2G0	1000.7	3999.78	4	0	8.2495	-0.68483	N-linked glycosylation
19932	19935	68.694	VVLHPNYSQVDIGLIK	gi|186910296, gi|4826762, gi|767989864	1913.68	N4H5F0S1G0	1237.57	3708.68	3	-2	8.1929	-2.7249	N-linked glycosylation
19087	19099	66.3788	VVLHPNYSQVDIGLIK	gi|186910296, gi|4826762, gi|767989864	1751.62	N4H4F0S1G0	1182.88	3546.63	3	0	7.3261	-0.38832	N-linked glycosylation
22246	22255	75.1342	VVLHPNYSQVDIGLIK	gi|186910296, gi|4826762, gi|767989864	2204.77	N4H5F0S2G0	1334.27	3999.78	3	-1	7.2992	-0.66591	N-linked glycosylation
19425	19434	67.3055	VVLHPNYSQVDIGLIK	gi|186910296, gi|4826762, gi|767989864	1913.68	N4H5F0S1G0	1236.9	3708.69	3	0	7.2245	0.10467	N-linked glycosylation
23416	23418	78.3645	VVLHPNYSQVDIGLIK	gi|186910296, gi|4826762, gi|767989864	2205.79	N4H5F2S1G0	1001.45	4000.78	4	-2	7.1907	-6.6064	N-linked glycosylation
16331	16338	58.733	VVLHPNYSQVDIGLIK	gi|186910296, gi|4826762, gi|767989864	1622.58	N4H5F0S0G0	1139.87	3417.59	3	0	6.318	-1.5467	N-linked glycosylation
18762	18771	65.4727	VVLHPNYSQVDIGLIK	gi|186910296, gi|4826762, gi|767989864	2075.73	N4H6F0S1G0	1291.59	3870.75	3	-2	6.3158	2.292	N-linked glycosylation
22389	22390	75.5108	VVLHPNYSQVDIGLIK	gi|186910296, gi|4826762, gi|767989864	2569.9	N5H6F0S2G0	1456.31	4364.92	3	-2	6.2613	-0.035929	N-linked glycosylation
18554	18561	64.8962	VVLHPNYSQVDIGLIK	gi|186910296, gi|4826762, gi|767989864	2278.81	N5H6F0S1G0	1359.62	4073.83	3	-3	6.2409	2.8092	N-linked glycosylation
19568	19570	67.6853	VVLHPNYSQVDIGLIK	gi|186910296, gi|4826762, gi|767989864	1913.68	N4H5F0S1G0	928.179	3708.69	4	-1	6.2153	-0.079171	N-linked glycosylation
23026	23038	77.3115	VVLHPNYSQVDIGLIK	gi|186910296, gi|4826762, gi|767989864	2204.77	N4H5F0S2G0	1000.95	3999.79	4	-1	6.2141	1.4063	N-linked glycosylation
28590	28591	92.7612	YLGNATAIFFLPDEGK	gi|189163528, gi|189163530, gi|189163532, gi|189163534, gi|189163536, gi|189163538, gi|189163540, gi|189163542, gi|50363217, gi|50363219, gi|50363221	1913.68	N4H5F0S1G0	1224.53	3669.57	3	-2	22.406	-0.074621	N-linked glycosylation
34050	34051	108.093	YLGNATAIFFLPDEGK	gi|189163528, gi|189163530, gi|189163532, gi|189163534, gi|189163536, gi|189163538, gi|189163540, gi|189163542, gi|50363217, gi|50363219, gi|50363221	2204.77	N4H5F0S2G0	1321.56	3960.67	3	-2	17.303	-0.30081	N-linked glycosylation
33868	33871	107.583	YLGNATAIFFLPDEGK	gi|189163528, gi|189163530, gi|189163532, gi|189163534, gi|189163536, gi|189163538, gi|189163540, gi|189163542, gi|50363217, gi|50363219, gi|50363221	2204.77	N4H5F0S2G0	1320.9	3960.67	3	0	16.3422	1.4241	N-linked glycosylation
23936	23937	79.8062	YLGNATAIFFLPDEGK	gi|189163528, gi|189163530, gi|189163532, gi|189163534, gi|189163536, gi|189163538, gi|189163540, gi|189163542, gi|50363217, gi|50363219, gi|50363221	1622.58	N4H5F0S0G0	1127.16	3378.47	3	-1	15.4562	-1.0205	N-linked glycosylation
34037	34038	108.056	YLGNATAIFFLPDEGK	gi|189163528, gi|189163530, gi|189163532, gi|189163534, gi|189163536, gi|189163538, gi|189163540, gi|189163542, gi|50363217, gi|50363219, gi|50363221	2204.77	N4H5F0S2G0	991.175	3960.67	4	-1	15.3835	1.0054	N-linked glycosylation
28616	28617	92.8337	YLGNATAIFFLPDEGK	gi|189163528, gi|189163530, gi|189163532, gi|189163534, gi|189163536, gi|189163538, gi|189163540, gi|189163542, gi|50363217, gi|50363219, gi|50363221	1913.68	N4H5F0S1G0	918.402	3669.58	4	-1	13.3708	1.8009	N-linked glycosylation
28772	28773	93.2732	YLGNATAIFFLPDEGK	gi|189163528, gi|189163530, gi|189163532, gi|189163534, gi|189163536, gi|189163538, gi|189163540, gi|189163542, gi|50363217, gi|50363219, gi|50363221	1913.68	N4H5F0S1G0	1223.86	3669.57	3	0	13.366	0.090565	N-linked glycosylation
28421	28427	92.3	YLGNATAIFFLPDEGK	gi|189163528, gi|189163530, gi|189163532, gi|189163534, gi|189163536, gi|189163538, gi|189163540, gi|189163542, gi|50363217, gi|50363219, gi|50363221	1913.68	N4H5F0S1G0	918.152	3669.59	4	0	13.3126	3.58	N-linked glycosylation
23780	23788	79.3912	YLGNATAIFFLPDEGK	gi|189163528, gi|189163530, gi|189163532, gi|189163534, gi|189163536, gi|189163538, gi|189163540, gi|189163542, gi|50363217, gi|50363219, gi|50363221	1622.58	N4H5F0S0G0	1690.24	3378.48	2	-1	11.4738	-0.43867	N-linked glycosylation
23871	23880	79.6468	YLGNATAIFFLPDEGK	gi|189163528, gi|189163530, gi|189163532, gi|189163534, gi|189163536, gi|189163538, gi|189163540, gi|189163542, gi|50363217, gi|50363219, gi|50363221	1622.58	N4H5F0S0G0	845.626	3378.48	4	-1	11.3265	0.20428	N-linked glycosylation
33855	33858	107.547	YLGNATAIFFLPDEGK	gi|189163528, gi|189163530, gi|189163532, gi|189163534, gi|189163536, gi|189163538, gi|189163540, gi|189163542, gi|50363217, gi|50363219, gi|50363221	2204.77	N4H5F0S2G0	991.174	3960.67	4	-1	10.379	0.019115	N-linked glycosylation
23741	23748	79.281	YLGNATAIFFLPDEGK	gi|189163528, gi|189163530, gi|189163532, gi|189163534, gi|189163536, gi|189163538, gi|189163540, gi|189163542, gi|50363217, gi|50363219, gi|50363221	1622.58	N4H5F0S0G0	1127.83	3378.47	3	-3	9.4329	-1.4167	N-linked glycosylation
24118	24124	80.3257	YLGNATAIFFLPDEGK	gi|189163528, gi|189163530, gi|189163532, gi|189163534, gi|189163536, gi|189163538, gi|189163540, gi|189163542, gi|50363217, gi|50363219, gi|50363221	1622.58	N4H5F0S0G0	1126.83	3378.47	3	0	9.3859	-1.9063	N-linked glycosylation
28954	28956	93.7882	YLGNATAIFFLPDEGK	gi|189163528, gi|189163530, gi|189163532, gi|189163534, gi|189163536, gi|189163538, gi|189163540, gi|189163542, gi|50363217, gi|50363219, gi|50363221	1913.68	N4H5F0S1G0	1223.87	3669.58	3	0	9.3739	1.7871	N-linked glycosylation
34414	34415	109.127	YLGNATAIFFLPDEGK	gi|189163528, gi|189163530, gi|189163532, gi|189163534, gi|189163536, gi|189163538, gi|189163540, gi|189163542, gi|50363217, gi|50363219, gi|50363221	2204.77	N4H5F0S2G0	1321.56	3960.66	3	-2	9.3293	-0.94804	N-linked glycosylation
33894	33900	107.665	YLGNATAIFFLPDEGK	gi|189163528, gi|189163530, gi|189163532, gi|189163534, gi|189163536, gi|189163538, gi|189163540, gi|189163542, gi|50363217, gi|50363219, gi|50363221	2221.79	N4H6F1S1G0	1326.57	3977.69	3	0	8.3394	1.96	N-linked glycosylation
29149	29154	94.3407	YLGNATAIFFLPDEGK	gi|189163528, gi|189163530, gi|189163532, gi|189163534, gi|189163536, gi|189163538, gi|189163540, gi|189163542, gi|50363217, gi|50363219, gi|50363221	1913.68	N4H5F0S1G0	1224.19	3669.56	3	-1	8.2987	-2.2873	N-linked glycosylation
28798	28807	93.367	YLGNATAIFFLPDEGK	gi|189163528, gi|189163530, gi|189163532, gi|189163534, gi|189163536, gi|189163538, gi|189163540, gi|189163542, gi|50363217, gi|50363219, gi|50363221	1913.68	N4H5F0S1G0	918.651	3669.57	4	-2	8.2736	0.42095	N-linked glycosylation
34219	34221	108.575	YLGNATAIFFLPDEGK	gi|189163528, gi|189163530, gi|189163532, gi|189163534, gi|189163536, gi|189163538, gi|189163540, gi|189163542, gi|50363217, gi|50363219, gi|50363221	2204.77	N4H5F0S2G0	991.425	3960.67	4	-2	7.2648	0.83639	N-linked glycosylation
28395	28399	92.2217	YLGNATAIFFLPDEGK	gi|189163528, gi|189163530, gi|189163532, gi|189163534, gi|189163536, gi|189163538, gi|189163540, gi|189163542, gi|50363217, gi|50363219, gi|50363221	1913.68	N4H5F0S1G0	1223.86	3669.56	3	0	6.312	-2.6039	N-linked glycosylation
29526	29528	95.3888	YLGNATAIFFLPDEGK	gi|189163528, gi|189163530, gi|189163532, gi|189163534, gi|189163536, gi|189163538, gi|189163540, gi|189163542, gi|50363217, gi|50363219, gi|50363221	1913.68	N4H5F0S1G0	1224.2	3669.58	3	-1	6.2065	1.2055	N-linked glycosylation
33829	33839	107.492	YLGNATAIFFLPDEGK	gi|189163528, gi|189163530, gi|189163532, gi|189163534, gi|189163536, gi|189163538, gi|189163540, gi|189163542, gi|50363217, gi|50363219, gi|50363221	2204.77	N4H5F0S2G0	1321.23	3960.66	3	-1	6.1309	-1.3338	N-linked glycosylation
9194	9195	39.0887	YPHKPEINSTTHPGADLQENFCR	gi|4503635	1913.68	N4H5F0S1G0	926.196	4624.94	5	-2	15.2374	0.47649	N-linked glycosylation
11196	11197	44.5677	YPHKPEINSTTHPGADLQENFCR	gi|4503635	2204.77	N4H5F0S2G0	984.612	4916.02	5	-3	14.1969	-3.9096	N-linked glycosylation
7686	7691	34.9523	YPHKPEINSTTHPGADLQENFCR	gi|4503635	1622.58	N4H5F0S0G0	867.578	4333.86	5	0	10.1962	2.6909	N-linked glycosylation
7491	7498	34.4242	YPHKPEINSTTHPGADLQENFCR	gi|4503635	1622.58	N4H5F0S0G0	867.776	4333.84	5	-1	10.1828	-0.39286	N-linked glycosylation
11001	11011	44.056	YPHKPEINSTTHPGADLQENFCR	gi|4503635	2204.77	N4H5F0S2G0	984.414	4916.03	5	-2	8.2325	-0.38399	N-linked glycosylation
9233	9236	39.1992	YPHKPEINSTTHPGADLQENFCR	gi|4503635	1913.68	N4H5F0S1G0	1157.49	4624.94	4	-2	7.2695	0.29444	N-linked glycosylation
9038	9042	38.6698	YPHKPEINSTTHPGADLQENFCR	gi|4503635	1913.68	N4H5F0S1G0	1157.49	4624.94	4	-2	7.2626	0.40001	N-linked glycosylation
11235	11240	44.6847	YPHKPEINSTTHPGADLQENFCR	gi|4503635	2204.77	N4H5F0S2G0	1230.26	4916.02	4	-2	7.2542	-2.8397	N-linked glycosylation
11391	11393	45.1067	YPHKPEINSTTHPGADLQENFCR	gi|4503635	2204.77	N4H5F0S2G0	984.611	4916.01	5	-3	7.1859	-4.7787	N-linked glycosylation
8999	9008	38.5752	YPHKPEINSTTHPGADLQENFCR	gi|4503635	1913.68	N4H5F0S1G0	926.195	4624.94	5	-2	6.2412	-0.84321	N-linked glycosylation
9389	9395	39.6347	YPHKPEINSTTHPGADLQENFCR	gi|4503635	1913.68	N4H5F0S1G0	926.795	4624.93	5	-5	6.1349	-2.6498	N-linked glycosylation

## Sheet: RAX
RAX: glycopeptides of human serum were enriched by HyperSep™ Retain AM Cartridges and analyzed by LC-MS/MS. GPQuest was used to identify the intact glycopeptides.
MS1 Scan Number	MS2 Scan Number	Retention Time (mins)	Peptide Sequence	RafSeq accession number	Candidate Glycan Exact Mass	Candidate Glycan Composition	Precursor Mz	Precursor Mass	Precursor Charge	Mass Shift	PSM Score Morpheus	Matching Error in ppm	Glycosylation type annotation
20616	20627	71.7967	LLHALGGDDFLGMLNR	gi|166795301	1913.68	N4H5F0S1G0	918.901	3671.58	4	-1	6.23	0.14417	N-linked glycosylation
26206	26208	87.4773	ELCTISHIFIPAMGNITYDFSFK	gi|105990532	1216.42	N2H5F0S0G0	1313.58	3936.72	3	-2	6.2242	-3.3479	N-linked glycosylation
32940	32943	106.463	ESVPSSGPTNVSALATTSSSMLVR	gi|767995065	2204.77	N4H5F0S2G0	1151.24	4598.94	4	-3	6.1267	-3.2693	N-linked glycosylation
15949	15950	58.6638	YDFNSSMLYSTAK	gi|105990532	1913.68	N4H5F0S1G0	1153.12	3456.35	3	-1	5.2232	-0.74325	N-linked glycosylation
32264	32267	104.557	EPCVESLVSQYFQTVTDYGK	gi|4502149	656.228	N1H1F0S1G0	1002.78	3006.32	3	0	14.2853	1.0491	O-linked glycosylation
28637	28641	94.3288	EPCVESLVSQYFQTVTDYGK	gi|4502149	365.132	N1H1F0S0G0	905.748	2715.23	3	0	14.2762	1.4321	O-linked glycosylation
31302	31314	101.866	EPCVESLVSQYFQTVTDYGK	gi|4502149	656.228	N1H1F0S1G0	1002.78	3006.32	3	0	13.2784	0.68369	O-linked glycosylation
6979	6985	33.4975	SCDTPPPCPR	gi|9857757	947.323	N1H1F0S2G0	711.944	2133.82	3	0	11.4507	-1.6843	O-linked glycosylation
35137	35142	112.709	EPCVESLVSQYFQTVTDYGK	gi|4502149	947.323	N1H1F0S2G0	1100.48	3297.4	3	-2	8.3056	-3.3372	O-linked glycosylation
5614	5621	29.6918	VEDLHVGATVAPSSRR	gi|194018472	656.228	N1H1F0S1G0	588.537	2350.12	4	-1	7.312	-1.5197	O-linked glycosylation
5224	5236	28.6103	SAGSVESPSVSSTHR	gi|62243068	947.323	N1H1F0S2G0	812.349	2435.03	3	0	6.3966	-0.80346	O-linked glycosylation
14610	14622	54.9323	KPTAIPK	gi|530421132	1532.55	N3H3F1S1G0	763.018	2287.04	3	0	5.3258	2.5213	O-linked glycosylation
12673	12682	49.4857	QSINETPLGSLSK	gi|32698686	730.264	N2H2F0S0G0	702.332	2103.98	3	-1	5.112	-7.4507	N-linked glycosylation
26401	26402	88.0247	NISDGFDGIPDNVDAALALPAHSYSGR	gi|88853069	1913.68	N4H5F0S1G0	1172.75	4685.99	4	-2	11.4751	-2.7756	N-linked glycosylation
29885	29887	97.8392	NISDGFDGIPDNVDAALALPAHSYSGR	gi|88853069	2204.77	N4H5F0S2G0	1245.78	4977.09	4	-3	10.4383	-0.18518	N-linked glycosylation
13414	13417	51.5493	NNATVHEQVGGPSLTSDLQAQSK	gi|88853069	2204.77	N4H5F0S2G0	1147.74	4585.94	4	-2	10.3117	0.61234	N-linked glycosylation
29690	29694	97.2955	NISDGFDGIPDNVDAALALPAHSYSGR	gi|88853069	2204.77	N4H5F0S2G0	1245.53	4977.09	4	-2	9.3962	-1.0808	N-linked glycosylation
23229	23232	79.1092	NISDGFDGIPDNVDAALALPAHSYSGR	gi|88853069	1622.58	N4H5F0S0G0	1099.49	4394.92	4	0	7.4196	4.0533	N-linked glycosylation
16690	16691	60.7483	NGSLFAFR	gi|88853069	1913.68	N4H5F0S1G0	942.389	2825.15	3	0	5.3258	0.7091	N-linked glycosylation
23242	23245	79.1457	NISDGFDGIPDNVDAALALPAHSYSGR	gi|88853069	1622.58	N4H5F0S0G0	1466.31	4394.91	3	-2	5.2424	1.8351	N-linked glycosylation
9826	9828	41.481	AQASSVPTAQPQAEGSLAK	gi|82407641	656.228	N1H1F0S1G0	833.396	2497.17	3	-1	12.4798	-0.078878	O-linked glycosylation
12556	12565	49.1577	AQASSVPTAQPQAEGSLAK	gi|82407641	947.323	N1H1F0S2G0	930.092	2788.26	3	0	9.4491	-0.88206	O-linked glycosylation
6485	6486	32.1042	AQASSVPTAQPQAEGSLAK	gi|82407641	365.132	N1H1F0S0G0	736.029	2206.07	3	0	8.5474	-0.78098	O-linked glycosylation
6680	6684	32.657	VATTVISK	gi|73858568, gi|73858570	1312.46	N2H2F0S2G0	710.991	2130.96	3	0	9.4095	1.81	O-linked glycosylation
5978	5989	30.7198	VATTVISK	gi|73858568, gi|73858570	1312.46	N2H2F0S2G0	710.99	2130.95	3	0	8.4292	0.005495	O-linked glycosylation
5965	5977	30.6858	VATTVISK	gi|73858568, gi|73858570	1312.46	N2H2F0S2G0	1065.98	2130.95	2	0	6.5758	-0.84789	O-linked glycosylation
6680	6687	32.6648	VATTVISK	gi|73858568, gi|73858570	1312.46	N2H2F0S2G0	1065.98	2130.95	2	0	6.5756	-0.16048	O-linked glycosylation
6875	6880	33.2053	VATTVISK	gi|73858568, gi|73858570	1312.46	N2H2F0S2G0	710.989	2130.95	3	0	6.3002	-1.1975	O-linked glycosylation
15598	15599	57.679	NLSMPLLPADFHK	gi|73858566	1913.68	N4H5F0S1G0	853.868	3412.45	4	0	17.376	-0.32747	N-linked glycosylation
19446	19447	68.4765	NLSMPLLPADFHK	gi|73858566	2204.77	N4H5F0S2G0	1235.86	3703.54	3	-2	16.3161	-0.21537	N-linked glycosylation
15611	15612	57.7153	NLSMPLLPADFHK	gi|73858566	1913.68	N4H5F0S1G0	1138.49	3412.45	3	-1	15.3618	0.12397	N-linked glycosylation
19446	19450	68.4843	NLSMPLLPADFHK	gi|73858566	2204.77	N4H5F0S2G0	741.515	3703.54	5	0	7.2433	-0.38807	N-linked glycosylation
15403	15406	57.1363	NLSMPLLPADFHK	gi|73858566	2059.73	N4H5F1S1G0	890.633	3558.5	4	-1	6.3936	-0.92462	N-linked glycosylation
15403	15414	57.1572	NLSMPLLPADFHK	gi|73858566	1913.68	N4H5F0S1G0	854.371	3412.45	4	-2	6.3886	0.85424	N-linked glycosylation
12322	12323	48.481	NLSMPLLPADFHK	gi|73858566	1622.58	N4H5F0S0G0	1041.12	3121.35	3	0	6.3646	-0.17735	N-linked glycosylation
20525	20528	71.5198	NLSMPLLPADFHK	gi|73858566	1913.68	N4H5F0S1G0	1132.82	3396.46	3	0	5.4001	0.40573	N-linked glycosylation
12127	12131	47.9418	NLSMPLLPADFHK	gi|73858566	1622.58	N4H5F0S0G0	1041.12	3121.36	3	0	5.3741	0.17462	N-linked glycosylation
11100	11110	45.0787	SPDESTPELSAEPTPK	gi|735997420, gi|735997422, gi|735997424, gi|735997426, gi|735997428	656.228	N1H1F0S1G0	1171.52	2341.02	2	-1	5.3509	1.4553	O-linked glycosylation
35371	35374	113.368	IVLDPSGSMNIYLVLDGSDSIGASNFTGAK	gi|67782358	2204.77	N4H5F0S2G0	1317.08	5262.29	4	-3	7.117	0.91752	N-linked glycosylation
8344	8345	37.3163	IPCSQPPQIEHGTINSSR	gi|62739186	1913.68	N4H5F0S1G0	984.423	3934.67	4	0	8.2376	1.4441	N-linked glycosylation
22436	22437	76.8745	SLGNVNFTVSAEALESQELCGTEVPSVPEHGR	gi|578822814, gi|66932947	1216.42	N2H5F0S0G0	1158.77	4630.05	4	-2	22.4862	0.36449	N-linked glycosylation
38412	38418	121.978	VSNQTLSLFFTVLQDVPVR	gi|578822814, gi|66932947	2204.77	N4H5F0S2G0	1092.74	4367.94	4	0	21.4563	-3.2883	N-linked glycosylation
32849	32855	106.215	VSNQTLSLFFTVLQDVPVR	gi|578822814, gi|66932947	1768.64	N4H5F1S0G0	984.212	3931.82	4	-2	15.5105	-0.49402	N-linked glycosylation
36840	36843	117.521	VSNQTLSLFFTVLQDVPVR	gi|578822814, gi|66932947	1913.68	N4H5F0S1G0	1020.47	4076.86	4	-2	13.5548	1.1045	N-linked glycosylation
22982	22983	78.4103	SLGNVNFTVSAEALESQELCGTEVPSVPEHGR	gi|578822814, gi|66932947	1216.42	N2H5F0S0G0	1159.02	4630.03	4	-3	13.4634	-4.8948	N-linked glycosylation
36983	36984	117.92	VSNQTLSLFFTVLQDVPVR	gi|578822814, gi|66932947	2059.73	N4H5F1S1G0	1056.49	4222.93	4	0	13.452	3.282	N-linked glycosylation
38412	38422	121.988	VSNQTLSLFFTVLQDVPVR	gi|578822814, gi|66932947	2204.77	N4H5F0S2G0	1457.32	4367.93	3	-2	13.3799	-4.4024	N-linked glycosylation
22618	22620	77.3883	SLGNVNFTVSAEALESQELCGTEVPSVPEHGR	gi|578822814, gi|66932947	1216.42	N2H5F0S0G0	1158.77	4630.06	4	-2	12.4703	1.8409	N-linked glycosylation
32836	32841	106.175	VSNQTLSLFFTVLQDVPVR	gi|578822814, gi|66932947	1768.64	N4H5F1S0G0	1311.62	3931.83	3	-1	12.4317	2.5046	N-linked glycosylation
36606	36610	116.863	VSNQTLSLFFTVLQDVPVR	gi|578822814, gi|66932947	2059.73	N4H5F1S1G0	1056.99	4222.92	4	-2	11.4749	1.2306	N-linked glycosylation
22800	22802	77.9017	SLGNVNFTVSAEALESQELCGTEVPSVPEHGR	gi|578822814, gi|66932947	1216.42	N2H5F0S0G0	1158.77	4630.06	4	-2	11.4402	1.3136	N-linked glycosylation
38412	38423	121.991	VSNQTLSLFFTVLQDVPVR	gi|578822814, gi|66932947	2350.79	N2H12F0S0G0	1129.76	4514	4	-2	11.2975	5.504	N-linked glycosylation
22176	22182	76.1608	SLGNVNFTVSAEALESQELCGTEVPSVPEHGR	gi|578822814, gi|66932947	1581.56	N3H6F0S0G0	1250.05	4995.17	4	-2	9.4828	-2.6676	N-linked glycosylation
36645	36650	116.975	VSNQTLSLFFTVLQDVPVR	gi|578822814, gi|66932947	1913.68	N4H5F0S1G0	1020.22	4076.86	4	-1	9.2912	1.1489	N-linked glycosylation
36931	36934	117.778	VSNQTLSLFFTVLQDVPVR	gi|578822814, gi|66932947	2060.76	N4H5F3S0G0	1408.64	4223.92	3	0	9.1553	-4.1753	N-linked glycosylation
36801	36803	117.408	VSNQTLSLFFTVLQDVPVR	gi|578822814, gi|66932947	2059.73	N4H5F1S1G0	1056.99	4222.91	4	-2	8.3909	-0.50381	N-linked glycosylation
36606	36617	116.881	VSNQTLSLFFTVLQDVPVR	gi|578822814, gi|66932947	2059.73	N4H5F1S1G0	1408.98	4222.92	3	-2	8.2667	0.22182	N-linked glycosylation
36840	36844	117.524	VSNQTLSLFFTVLQDVPVR	gi|578822814, gi|66932947	1913.68	N4H5F0S1G0	1360.29	4076.86	3	-2	7.448	0.089544	N-linked glycosylation
36385	36397	116.259	VSNQTLSLFFTVLQDVPVR	gi|578822814, gi|66932947	2424.87	N5H6F1S1G0	1148.02	4588.04	4	-1	7.308	-1.7275	N-linked glycosylation
33486	33487	108.005	GCVLLSYLNETVTVSASLESVR	gi|578822814, gi|66932947	1913.68	N4H5F0S1G0	1078.99	4310.93	4	-2	7.2517	4.5735	N-linked glycosylation
38438	38443	122.049	VSNQTLSLFFTVLQDVPVR	gi|578822814, gi|66932947	2350.79	N2H12F0S0G0	1505.34	4514.02	3	0	7.1812	9.8327	N-linked glycosylation
23164	23166	78.9233	SLGNVNFTVSAEALESQELCGTEVPSVPEHGR	gi|578822814, gi|66932947	1216.42	N2H5F0S0G0	1158.77	4630.04	4	-2	6.4003	-1.6392	N-linked glycosylation
22280	22283	76.4435	SLGNVNFTVSAEALESQELCGTEVPSVPEHGR	gi|578822814, gi|66932947	1216.42	N2H5F0S0G0	1544.35	4630.05	3	-1	5.4418	-1.2811	N-linked glycosylation
22358	22365	76.6717	SLGNVNFTVSAEALESQELCGTEVPSVPEHGR	gi|578822814, gi|66932947	1257.45	N3H4F0S0G0	1169.03	4671.08	4	-2	5.3338	1.2522	N-linked glycosylation
24919	24922	83.8623	SLGNVNFTVSAEALESQELCGTEVPSVPEHGR	gi|578822814, gi|66932947	1872.65	N3H6F0S1G0	1322.83	5286.28	4	-2	5.2938	-0.61596	N-linked glycosylation
36905	36917	117.728	VSNQTLSLFFTVLQDVPVR	gi|578822814, gi|66932947	2075.73	N4H6F0S1G0	1061.24	4238.94	4	-3	5.244	6.0149	N-linked glycosylation
36645	36655	116.989	VSNQTLSLFFTVLQDVPVR	gi|578822814, gi|66932947	1913.68	N4H5F0S1G0	1360.3	4076.88	3	-2	5.1508	5.1198	N-linked glycosylation
37879	37890	120.49	GCVLLSYLNETVTVSASLESVR	gi|578822814, gi|66932947	2204.77	N4H5F0S2G0	1152.01	4602.03	4	-3	5.1504	4.3638	N-linked glycosylation
22488	22500	77.0485	INNDFNYEFYNSTWSYVK	gi|45580688, gi|767934639	1216.42	N2H5F0S0G0	1174.49	3520.46	3	-1	5.1218	2.8937	N-linked glycosylation
20798	20799	72.2815	QQQHLFGSNVTDCSGNFCLFR	gi|4557871, gi|767927446	1913.68	N4H5F0S1G0	1107.95	4428.79	4	0	8.1436	-2.5279	N-linked glycosylation
18965	18966	67.1257	CGLVPVLAENYNK	gi|4557871, gi|767927446	1913.68	N4H5F0S1G0	1131.15	3390.43	3	-1	7.393	0.04803	N-linked glycosylation
23866	23869	80.9	CGLVPVLAENYNK	gi|4557871, gi|767927446	2204.77	N4H5F0S2G0	921.639	3681.52	4	-2	7.3294	-0.12495	N-linked glycosylation
20824	20827	72.3603	QQQHLFGSNVTDCSGNFCLFR	gi|4557871, gi|767927446	1913.68	N4H5F0S1G0	1476.94	4428.79	3	0	6.1409	-1.6706	N-linked glycosylation
18822	18832	66.749	CGLVPVLAENYNK	gi|4557871, gi|767927446	1913.68	N4H5F0S1G0	848.611	3390.42	4	-1	5.3959	-3.7721	N-linked glycosylation
18770	18776	66.5937	CGLVPVLAENYNK	gi|4557871, gi|767927446	1913.68	N4H5F0S1G0	1130.82	3390.43	3	0	5.3433	1.6496	N-linked glycosylation
23957	23959	81.1537	CGLVPVLAENYNK	gi|4557871, gi|767927446	2204.77	N4H5F0S2G0	1228.51	3681.52	3	-2	5.3376	-0.78469	N-linked glycosylation
10619	10620	43.7042	ELHHLQEQNVSNAFLDK	gi|4557485, gi|578807061, gi|578807063, gi|578807065, gi|578807068, gi|767925751	1913.68	N4H5F0S1G0	985.178	3935.68	4	-2	21.3054	0.12595	N-linked glycosylation
13271	13274	51.1478	ELHHLQEQNVSNAFLDK	gi|4557485, gi|578807061, gi|578807063, gi|578807065, gi|578807068, gi|767925751	2204.77	N4H5F0S2G0	1057.7	4226.78	4	-1	17.2946	0.23182	N-linked glycosylation
10164	10165	42.4295	EHEGAIYPDNTTDFQR	gi|4557485, gi|578807061, gi|578807063, gi|578807065, gi|578807068, gi|767925751	1913.68	N4H5F0S1G0	1270.18	3806.52	3	-2	15.3321	-0.66317	N-linked glycosylation
20720	20723	72.0678	ENLTAPGSDSAVFFEQGTTR	gi|4557485, gi|578807061, gi|578807063, gi|578807065, gi|578807068, gi|767925751	1913.68	N4H5F0S1G0	1011.18	4040.68	4	-1	12.3245	1.8949	N-linked glycosylation
8461	8463	37.6485	ELHHLQEQNVSNAFLDK	gi|4557485, gi|578807061, gi|578807063, gi|578807065, gi|578807068, gi|767925751	1622.58	N4H5F0S0G0	912.154	3644.59	4	-1	11.338	0.50443	N-linked glycosylation
25257	25263	84.819	ENLTAPGSDSAVFFEQGTTR	gi|4557485, gi|578807061, gi|578807063, gi|578807065, gi|578807068, gi|767925751	2204.77	N4H5F0S2G0	1084.2	4331.77	4	-2	9.3431	-0.51499	N-linked glycosylation
10801	10804	44.222	ELHHLQEQNVSNAFLDK	gi|4557485, gi|578807061, gi|578807063, gi|578807065, gi|578807068, gi|767925751	1913.68	N4H5F0S1G0	984.678	3935.69	4	0	9.3142	2.327	N-linked glycosylation
10177	10179	42.4683	EHEGAIYPDNTTDFQR	gi|4557485, gi|578807061, gi|578807063, gi|578807065, gi|578807068, gi|767925751	1913.68	N4H5F0S1G0	952.887	3806.52	4	-2	9.3049	-0.15337	N-linked glycosylation
10398	10399	43.084	ELHHLQEQNVSNAFLDK	gi|4557485, gi|578807061, gi|578807063, gi|578807065, gi|578807068, gi|767925751	2278.81	N5H6F0S1G0	1075.96	4300.82	4	0	9.2929	1.5339	N-linked glycosylation
16105	16106	59.1023	ELHHLQEQNVSNAFLDK	gi|4557485, gi|578807061, gi|578807063, gi|578807065, gi|578807068, gi|767925751	2861	N5H6F0S3G0	1222.01	4883	4	-2	9.2379	-0.29887	N-linked glycosylation
13115	13118	50.71	ELHHLQEQNVSNAFLDK	gi|4557485, gi|578807061, gi|578807063, gi|578807065, gi|578807068, gi|767925751	2569.9	N5H6F0S2G0	1149.23	4591.91	4	-2	9.2294	-0.27749	N-linked glycosylation
13154	13157	50.8197	EHEGAIYPDNTTDFQR	gi|4557485, gi|578807061, gi|578807063, gi|578807065, gi|578807068, gi|767925751	2204.77	N4H5F0S2G0	1366.88	4097.61	3	-1	8.3417	-1.6597	N-linked glycosylation
10060	10062	42.1402	EHEGAIYPDNTTDFQR	gi|4557485, gi|578807061, gi|578807063, gi|578807065, gi|578807068, gi|767925751	2059.73	N4H5F1S1G0	1318.86	3952.57	3	-2	8.3212	-2.7177	N-linked glycosylation
13466	13467	51.6902	ELHHLQEQNVSNAFLDK	gi|4557485, gi|578807061, gi|578807063, gi|578807065, gi|578807068, gi|767925751	2204.77	N4H5F0S2G0	1057.95	4226.78	4	-2	8.2761	0.13123	N-linked glycosylation
13349	13350	51.3617	EHEGAIYPDNTTDFQR	gi|4557485, gi|578807061, gi|578807063, gi|578807065, gi|578807068, gi|767925751	2204.77	N4H5F0S2G0	1366.88	4097.61	3	-1	8.2701	-1.6597	N-linked glycosylation
13336	13337	51.3247	EHEGAIYPDNTTDFQR	gi|4557485, gi|578807061, gi|578807063, gi|578807065, gi|578807068, gi|767925751	2204.77	N4H5F0S2G0	1025.66	4097.61	4	-2	8.2447	-0.3664	N-linked glycosylation
12972	12977	50.3133	EHEGAIYPDNTTDFQR	gi|4557485, gi|578807061, gi|578807063, gi|578807065, gi|578807068, gi|767925751	2350.83	N4H5F1S2G0	1062.18	4243.68	4	-2	8.2297	1.8808	N-linked glycosylation
10346	10348	42.9418	EHEGAIYPDNTTDFQR	gi|4557485, gi|578807061, gi|578807063, gi|578807065, gi|578807068, gi|767925751	1913.68	N4H5F0S1G0	1269.51	3806.52	3	0	7.3247	0.16951	N-linked glycosylation
7473	7479	34.8825	EHEGAIYPDNTTDFQR	gi|4557485, gi|578807061, gi|578807063, gi|578807065, gi|578807068, gi|767925751	1622.58	N4H5F0S0G0	1172.81	3515.42	3	-1	7.3043	-1.6209	N-linked glycosylation
13518	13519	51.8358	EHEGAIYPDNTTDFQR	gi|4557485, gi|578807061, gi|578807063, gi|578807065, gi|578807068, gi|767925751	2204.77	N4H5F0S2G0	1025.66	4097.61	4	-2	7.1563	-0.60472	N-linked glycosylation
25452	25457	85.3652	ENLTAPGSDSAVFFEQGTTR	gi|4557485, gi|578807061, gi|578807063, gi|578807065, gi|578807068, gi|767925751	2204.77	N4H5F0S2G0	1084.2	4331.77	4	-2	6.3401	0.4995	N-linked glycosylation
7668	7670	35.4213	EHEGAIYPDNTTDFQR	gi|4557485, gi|578807061, gi|578807063, gi|578807065, gi|578807068, gi|767925751	1622.58	N4H5F0S0G0	1172.81	3515.42	3	-1	6.2719	0.15001	N-linked glycosylation
12959	12960	50.2665	ELHHLQEQNVSNAFLDK	gi|4557485, gi|578807061, gi|578807063, gi|578807065, gi|578807068, gi|767925751	2715.96	N5H6F1S2G0	1186	4737.96	4	-3	6.2413	-1.1398	N-linked glycosylation
13141	13152	50.8042	EHEGAIYPDNTTDFQR	gi|4557485, gi|578807061, gi|578807063, gi|578807065, gi|578807068, gi|767925751	2204.77	N4H5F0S2G0	1025.41	4097.61	4	-1	6.2325	-0.50097	N-linked glycosylation
13531	13532	51.8728	EHEGAIYPDNTTDFQR	gi|4557485, gi|578807061, gi|578807063, gi|578807065, gi|578807068, gi|767925751	2204.77	N4H5F0S2G0	1367.21	4097.6	3	-2	6.2195	-2.8955	N-linked glycosylation
10073	10074	42.1738	EHEGAIYPDNTTDFQR	gi|4557485, gi|578807061, gi|578807063, gi|578807065, gi|578807068, gi|767925751	2059.73	N4H5F1S1G0	989.4	3952.57	4	-2	6.1763	-2.0723	N-linked glycosylation
7525	7533	35.0338	EHEGAIYPDNTTDFQR	gi|4557485, gi|578807061, gi|578807063, gi|578807065, gi|578807068, gi|767925751	1622.58	N4H5F0S0G0	880.114	3515.43	4	-2	6.128	0.71999	N-linked glycosylation
9969	9975	41.8945	EHEGAIYPDNTTDFQR	gi|4557485, gi|578807061, gi|578807063, gi|578807065, gi|578807068, gi|767925751	1913.68	N4H5F0S1G0	1269.85	3806.52	3	-1	5.1442	-0.58355	N-linked glycosylation
12972	12978	50.316	EHEGAIYPDNTTDFQR	gi|4557485, gi|578807061, gi|578807063, gi|578807065, gi|578807068, gi|767925751	2350.83	N4H5F1S2G0	1415.9	4243.68	3	-2	5.1442	1.8262	N-linked glycosylation
33499	33511	108.071	DVQIIVFPEDGIHGFNFTR	gi|4557373, gi|528524481, gi|528524483, gi|528524486, gi|528524488, gi|578806517, gi|767924112	2204.77	N4H5F0S2G0	1103.48	4408.89	4	-2	6.2751	1.4149	N-linked glycosylation
18016	18027	64.4968	AATVGSLAGQPLQER	gi|4557325, gi|705044002, gi|705044063, gi|705044104, gi|705044152	947.323	N1H1F0S2G0	816.048	2445.13	3	-1	10.5657	0.27239	O-linked glycosylation
6693	6704	32.712	VQAAVGTSAAPVPSDNH	gi|4557325, gi|705044002, gi|705044063, gi|705044104, gi|705044152	365.132	N1H1F0S0G0	662.648	1985.93	3	0	9.5076	-0.91137	O-linked glycosylation
12751	12755	49.6912	AATVGSLAGQPLQER	gi|4557325, gi|705044002, gi|705044063, gi|705044104, gi|705044152	1021.36	N2H2F0S1G0	840.728	2519.17	3	-1	7.5666	1.3806	O-linked glycosylation
17717	17729	63.6602	AATVGSLAGQPLQER	gi|4557325, gi|705044002, gi|705044063, gi|705044104, gi|705044152	1312.46	N2H2F0S2G0	937.425	2810.26	3	0	7.3991	0.49764	O-linked glycosylation
10008	10020	42.0195	VQAAVGTSAAPVPSDNH	gi|4557325, gi|705044002, gi|705044063, gi|705044104, gi|705044152	656.228	N1H1F0S1G0	759.681	2277.03	3	0	7.3907	0.33004	O-linked glycosylation
8773	8783	38.5452	AATVGSLAGQPLQER	gi|4557325, gi|705044002, gi|705044063, gi|705044104, gi|705044152	730.264	N2H2F0S0G0	743.361	2228.07	3	0	6.6794	-0.02794	O-linked glycosylation
29417	29418	96.5202	FSEFWDLDPEVRPTSAVAA	gi|4557323	656.228	N1H1F0S1G0	931.757	2793.26	3	0	17.3495	1.6156	O-linked glycosylation
34721	34722	111.516	FSEFWDLDPEVRPTSAVAA	gi|4557323	947.323	N1H1F0S2G0	1028.79	3084.35	3	0	17.3385	0.92819	O-linked glycosylation
29235	29236	96.008	FSEFWDLDPEVRPTSAVAA	gi|4557323	656.228	N1H1F0S1G0	931.757	2793.26	3	0	15.3442	1.1568	O-linked glycosylation
29599	29600	97.0323	FSEFWDLDPEVRPTSAVAA	gi|4557323	656.228	N1H1F0S1G0	931.758	2793.26	3	0	14.363	2.0745	O-linked glycosylation
34539	34542	111.003	FSEFWDLDPEVRPTSAVAA	gi|4557323	947.323	N1H1F0S2G0	1029.12	3084.35	3	-1	13.3039	0.355	O-linked glycosylation
24945	24946	83.9305	FSEFWDLDPEVRPTSAVAA	gi|4557323	365.132	N1H1F0S0G0	835.058	2502.16	3	-1	12.4439	0.073346	O-linked glycosylation
29443	29444	96.5932	FSEFWDLDPEVRPTSAVAA	gi|4557323	656.228	N1H1F0S1G0	1397.13	2793.25	2	0	11.456	0.65868	O-linked glycosylation
24750	24758	83.401	FSEFWDLDPEVRPTSAVAA	gi|4557323	365.132	N1H1F0S0G0	834.722	2502.15	3	0	11.3842	-2.3668	O-linked glycosylation
29404	29414	96.5067	FSEFWDLDPEVRPTSAVAA	gi|4557323	673.243	N1H2F1S0G0	938.1	2810.28	3	-2	10.3887	3.3302	O-linked glycosylation
29040	29043	95.4637	FSEFWDLDPEVRPTSAVAA	gi|4557323	656.228	N1H1F0S1G0	931.758	2793.26	3	0	10.3412	2.2712	O-linked glycosylation
24763	24770	83.4348	FSEFWDLDPEVRPTSAVAA	gi|4557323	365.132	N1H1F0S0G0	1251.58	2502.16	2	0	9.4856	1.9802	O-linked glycosylation
9332	9340	40.1082	PEVRPTSAVAA	gi|4557323	947.323	N1H1F0S2G0	682.312	2044.92	3	0	8.5064	0.47525	O-linked glycosylation
23866	23877	80.9208	DKFSEFWDLDPEVRPTSAVAA	gi|4557323	365.132	N1H1F0S0G0	915.766	2745.28	3	0	8.4211	0.99302	O-linked glycosylation
5926	5931	30.5578	PEVRPTSAVAA	gi|4557323	656.228	N1H1F0S1G0	585.279	1753.82	3	0	7.5074	-1.4284	O-linked glycosylation
5913	5916	30.5165	PEVRPTSAVAA	gi|4557323	656.228	N1H1F0S1G0	877.416	1753.82	2	0	7.4612	0.49284	O-linked glycosylation
34903	34904	112.033	FSEFWDLDPEVRPTSAVAA	gi|4557323	947.323	N1H1F0S2G0	1029.12	3084.35	3	-1	7.285	1.5423	O-linked glycosylation
34513	34521	110.943	FSEFWDLDPEVRPTSAVAA	gi|4557323	1150.4	N2H1F0S2G0	1096.48	3287.42	3	0	7.2678	-0.70523	O-linked glycosylation
29963	29973	98.0798	FSEFWDLDPEVRPTSAVAA	gi|4557323	656.228	N1H1F0S1G0	932.088	2793.24	3	-1	5.2716	-2.6882	O-linked glycosylation
20447	20448	71.2943	IPSCDSSPVSTEQLAPTAPPELTPVVQDCYHGDGQSYR	gi|4505881	365.132	N1H1F0S0G0	1131.76	4524.02	4	0	18.2726	-2.1659	O-linked glycosylation
22592	22594	77.315	IPSCDSSPVSTEQLAPTAPPELTPVVQDCYHGDGQSYR	gi|4505881	656.228	N1H1F0S1G0	1205.04	4815.14	4	-2	14.2464	1.8063	O-linked glycosylation
22436	22442	76.8877	IPSCDSSPVSTEQLAPTAPPELTPVVQDCYHGDGQSYR	gi|4505881	673.243	N1H2F1S0G0	1209.29	4832.14	4	-2	14.2175	-0.35591	O-linked glycosylation
22475	22482	76.9987	IPSCDSSPVSTEQLAPTAPPELTPVVQDCYHGDGQSYR	gi|4505881	656.228	N1H1F0S1G0	964.436	4815.14	5	-3	11.2003	1.2464	O-linked glycosylation
23528	23529	79.9455	IPSCDSSPVSTEQLAPTAPPELTPVVQDCYHGDGQSYR	gi|4505881	656.228	N1H1F0S1G0	1205.53	4815.1	4	-4	7.1362	-5.9758	O-linked glycosylation
22449	22456	76.926	IPSCDSSPVSTEQLAPTAPPELTPVVQDCYHGDGQSYR	gi|4505881	656.228	N1H1F0S1G0	1606.38	4815.12	3	-2	5.2164	-1.3601	O-linked glycosylation
9293	9294	39.9805	YPHKPEINSTTHPGADLQENFCR	gi|4503635	1913.68	N4H5F0S1G0	926.196	4624.94	5	-2	17.2205	0.54247	N-linked glycosylation
11165	11167	45.2398	YPHKPEINSTTHPGADLQENFCR	gi|4503635	2204.77	N4H5F0S2G0	984.419	4916.06	5	-2	15.1975	4.0856	N-linked glycosylation
11178	11179	45.274	YPHKPEINSTTHPGADLQENFCR	gi|4503635	2204.77	N4H5F0S2G0	1230.27	4916.04	4	-2	11.2443	0.43799	N-linked glycosylation
7967	7970	36.2625	YPHKPEINSTTHPGADLQENFCR	gi|4503635	1622.58	N4H5F0S0G0	867.775	4333.84	5	-1	11.2172	-1.2379	N-linked glycosylation
9475	9476	40.4917	YPHKPEINSTTHPGADLQENFCR	gi|4503635	1913.68	N4H5F0S1G0	925.796	4624.95	5	0	9.2041	1.373	N-linked glycosylation
9345	9346	40.1268	YPHKPEINSTTHPGADLQENFCR	gi|4503635	1913.68	N4H5F0S1G0	1157.74	4624.93	4	-3	8.2409	-1.3811	N-linked glycosylation
16677	16678	60.712	NFTENDLLVR	gi|4503635	1913.68	N4H5F0S1G0	1045.78	3134.31	3	-1	7.3883	0.95985	N-linked glycosylation
9657	9658	41.0017	YPHKPEINSTTHPGADLQENFCR	gi|4503635	1913.68	N4H5F0S1G0	925.794	4624.94	5	0	7.2543	-0.80453	N-linked glycosylation
9150	9153	39.5853	YPHKPEINSTTHPGADLQENFCR	gi|4503635	1913.68	N4H5F0S1G0	1157.74	4624.94	4	-3	6.2418	-0.74767	N-linked glycosylation
11360	11362	45.7863	YPHKPEINSTTHPGADLQENFCR	gi|4503635	2204.77	N4H5F0S2G0	984.613	4916.03	5	-3	6.1709	-2.1093	N-linked glycosylation
21539	21549	74.3848	NFTENDLLVR	gi|4503635	2204.77	N4H5F0S2G0	857.607	3425.4	4	-2	5.3518	-0.051921	N-linked glycosylation
9527	9528	40.637	YPHKPEINSTTHPGADLQENFCR	gi|4503635	1913.68	N4H5F0S1G0	1157.49	4624.94	4	-2	5.2253	-0.23344	N-linked glycosylation
9098	9101	39.4398	YPHKPEINSTTHPGADLQENFCR	gi|4503635	1913.68	N4H5F0S1G0	926.196	4624.94	5	-2	5.2181	0.080576	N-linked glycosylation
12465	12475	48.9047	NFTENDLLVR	gi|4503635	1622.58	N4H5F0S0G0	948.743	2843.21	3	-1	5.1894	0.73684	N-linked glycosylation
11490	11498	46.1665	YPHKPEINSTTHPGADLQENFCR	gi|4503635	2204.77	N4H5F0S2G0	984.014	4916.04	5	0	5.1785	0.7698	N-linked glycosylation
10021	10022	42.0278	YPHKPEINSTTHPGADLQENFCR	gi|4503635	1913.68	N4H5F0S1G0	926.393	4624.93	5	-3	5.1338	-3.271	N-linked glycosylation
16846	16855	61.207	SHAPEVITSSPL	gi|4503625	947.323	N1H1F0S2G0	1092.99	2184.97	2	0	7.4524	0.65534	O-linked glycosylation
16846	16857	61.2122	SHAPEVITSSPL	gi|4503625	947.323	N1H1F0S2G0	728.993	2184.96	3	0	7.3523	-1.1661	O-linked glycosylation
13856	13863	52.801	SHAPEVITSSPL	gi|4503625	656.228	N1H1F0S1G0	947.441	1893.87	2	0	6.2638	1.6918	O-linked glycosylation
37346	37348	118.958	AVNITSENLIDDVVSLIR	gi|4502511	1913.68	N4H5F0S1G0	972.446	3884.75	4	-2	6.325	-0.058013	N-linked glycosylation
37346	37347	118.955	AVNITSENLIDDVVSLIR	gi|4502511	1913.68	N4H5F0S1G0	1296.26	3884.76	3	-2	6.232	1.7049	N-linked glycosylation
20577	20582	71.6713	DIVEYYNDSNGSHVLQGR	gi|4502337	2205.79	N4H5F2S1G0	1069.19	4271.71	4	-2	5.1002	-9.1783	N-linked glycosylation
31029	31032	101.069	LGACNDTLQQLMEVFK	gi|4502261, gi|530364787	2204.77	N4H5F0S2G0	1023.43	4087.67	4	-3	13.2843	-1.6796	N-linked glycosylation
31211	31212	101.579	LGACNDTLQQLMEVFK	gi|4502261, gi|530364787	2204.77	N4H5F0S2G0	1023.18	4087.67	4	-2	11.2791	-0.67967	N-linked glycosylation
26128	26130	87.2578	LGACNDTLQQLMEVFK	gi|4502261, gi|530364787	1913.68	N4H5F0S1G0	1266.2	3796.58	3	0	7.2385	-1.5489	N-linked glycosylation
8045	8053	36.4942	DANISQPETTKEGLR	gi|4502165	947.323	N1H1F0S2G0	869.393	2606.16	3	0	9.3739	2.5693	O-linked glycosylation
5107	5111	28.2598	DANISQPETTKEGLR	gi|4502165	656.228	N1H1F0S1G0	772.358	2315.06	3	0	8.5051	-1.3777	O-linked glycosylation
17886	17888	64.1082	ADGTVNQIEGEATPVNLTEPAK	gi|4502163	2059.73	N4H5F1S1G0	1439.29	4313.85	3	-2	7.1828	-1.6392	N-linked glycosylation
36762	36765	117.301	VTQNLTLIEESLTSEFIHDIDR	gi|39725934	2204.77	N4H5F0S2G0	1195.53	4778.08	4	-1	10.3743	0.46326	N-linked glycosylation
13648	13654	52.2137	GLTFQQNASSMCGPDQDTAIR	gi|38635953	2262.81	N5H5F1S1G0	1525.94	4575.82	3	0	5.1042	-4.65	N-linked glycosylation
38373	38379	121.87	MLNTSSLLEQLNEQFNWVSR	gi|355594753, gi|578815184	2569.9	N5H6F0S2G0	1250.03	4995.08	4	-2	14.2593	-0.44464	N-linked glycosylation
16976	16977	61.5513	LANLTQGEDQYYLR	gi|355594753, gi|578815184	1913.68	N4H5F0S1G0	1199.84	3597.51	3	0	9.4137	0.40154	N-linked glycosylation
16833	16837	61.157	LANLTQGEDQYYLR	gi|355594753, gi|578815184	1913.68	N4H5F0S1G0	900.133	3597.51	4	0	8.4351	-0.34845	N-linked glycosylation
21136	21138	73.2353	LANLTQGEDQYYLR	gi|355594753, gi|578815184	2204.77	N4H5F0S2G0	973.159	3888.61	4	-1	8.3745	0.21131	N-linked glycosylation
21500	21503	74.2568	LANLTQGEDQYYLR	gi|355594753, gi|578815184	2204.77	N4H5F0S2G0	973.159	3888.61	4	-1	5.3198	0.96471	N-linked glycosylation
21279	21280	73.6318	LANLTQGEDQYYLR	gi|355594753, gi|578815184	2204.77	N4H5F0S2G0	1296.87	3888.6	3	0	5.31	-2.6897	N-linked glycosylation
35033	35038	112.414	MLNTSSLLEQLNEQFNWVSR	gi|355594753, gi|578815184	1913.68	N4H5F0S1G0	1086.23	4338.87	4	-3	5.1471	1.7674	N-linked glycosylation
15585	15587	57.645	LNAENNATFYFK	gi|323714253, gi|5031631	1913.68	N4H5F0S1G0	1116.13	3345.37	3	-1	6.4038	0.067658	N-linked glycosylation
14259	14260	53.9183	TMVFPVMYLNESVHIDK	gi|323714253, gi|5031631	2204.77	N4H5F0S2G0	1057.7	4227.77	4	0	6.2095	-2.3874	N-linked glycosylation
11555	11558	46.3348	TMVFPVMYLNESVHIDK	gi|323714253, gi|5031631	1913.68	N4H5F0S1G0	985.423	3936.66	4	-2	6.2024	-4.4073	N-linked glycosylation
14077	14078	53.4083	TMVFPVMYLNESVHIDK	gi|323714253, gi|5031631	2204.77	N4H5F0S2G0	1058.2	4227.76	4	-2	5.2041	-2.8195	N-linked glycosylation
12348	12349	48.5535	HYTNPSQDVTVPCPVPSTPPTPSPSTPPTPSPSCCHPR	gi|31615935	1298.48	N4H3F0S0G0	1360.35	5435.36	4	-3	15.2191	-1.3645	O-linked glycosylation
13388	13390	51.4735	HYTNPSQDVTVPCPVPSTPPTPSPSTPPTPSPSCCHPR	gi|31615935	1751.62	N4H4F0S1G0	1473.64	5888.51	4	-3	13.2319	-1.1362	O-linked glycosylation
12790	12791	49.7923	HYTNPSQDVTVPCPVPSTPPTPSPSTPPTPSPSCCHPR	gi|31615935	1136.42	N4H2F0S0G0	1319.59	5273.31	4	-2	13.2279	-0.20219	O-linked glycosylation
13804	13806	52.6413	HYTNPSQDVTVPCPVPSTPPTPSPSTPPTPSPSCCHPR	gi|31615935	1589.57	N4H3F0S1G0	1146.9	5726.46	5	-4	13.2057	-0.38066	O-linked glycosylation
13375	13377	51.437	HYTNPSQDVTVPCPVPSTPPTPSPSTPPTPSPSCCHPR	gi|31615935	1751.62	N4H4F0S1G0	1178.52	5888.57	5	0	13.1855	9.9202	O-linked glycosylation
13726	13728	52.422	HYTNPSQDVTVPCPVPSTPPTPSPSTPPTPSPSCCHPR	gi|31615935	1589.57	N4H3F0S1G0	1433.12	5726.45	4	-3	12.2315	-1.498	O-linked glycosylation
13713	13714	52.383	HYTNPSQDVTVPCPVPSTPPTPSPSTPPTPSPSCCHPR	gi|31615935	1386.49	N3H3F0S1G0	1382.35	5523.37	4	-3	12.2308	-1.7642	O-linked glycosylation
13401	13405	51.515	HYTNPSQDVTVPCPVPSTPPTPSPSTPPTPSPSCCHPR	gi|31615935	365.132	N1H1F0S0G0	1126.26	4502.03	4	0	12.2019	0.81623	O-linked glycosylation
12530	12531	49.0642	HYTNPSQDVTVPCPVPSTPPTPSPSTPPTPSPSCCHPR	gi|31615935	1298.48	N4H3F0S0G0	1359.6	5435.38	4	0	11.2368	2.1941	O-linked glycosylation
14129	14131	53.5572	HYTNPSQDVTVPCPVPSTPPTPSPSTPPTPSPSCCHPR	gi|31615935	1751.62	N4H4F0S1G0	1179.31	5888.49	5	-4	11.1931	-3.6152	O-linked glycosylation
15052	15054	56.1482	HYTNPSQDVTVPCPVPSTPPTPSPSTPPTPSPSCCHPR	gi|31615935	2042.72	N4H4F0S2G0	1237.33	6179.6	5	-3	11.1704	-0.85788	O-linked glycosylation
14090	14092	53.4475	HYTNPSQDVTVPCPVPSTPPTPSPSTPPTPSPSCCHPR	gi|31615935	1589.57	N4H3F0S1G0	1432.37	5726.47	4	0	10.2145	0.60064	O-linked glycosylation
12400	12401	48.6988	HYTNPSQDVTVPCPVPSTPPTPSPSTPPTPSPSCCHPR	gi|31615935	1298.48	N4H3F0S0G0	1088.48	5435.37	5	-3	10.1862	0.45237	O-linked glycosylation
12049	12053	47.7225	HYTNPSQDVTVPCPVPSTPPTPSPSTPPTPSPSCCHPR	gi|31615935	1095.4	N3H3F0S0G0	1309.58	5232.28	4	-3	9.2384	-0.89378	O-linked glycosylation
11984	11985	47.5333	HYTNPSQDVTVPCPVPSTPPTPSPSTPPTPSPSCCHPR	gi|31615935	1460.53	N4H4F0S0G0	1400.12	5597.44	4	0	9.2242	3.689	O-linked glycosylation
14220	14226	53.822	HYTNPSQDVTVPCPVPSTPPTPSPSTPPTPSPSCCHPR	gi|31615935	1224.44	N3H2F0S1G0	1341.59	5361.33	4	-2	9.2234	0.733	O-linked glycosylation
12907	12911	50.1287	HYTNPSQDVTVPCPVPSTPPTPSPSTPPTPSPSCCHPR	gi|31615935	1298.48	N4H3F0S0G0	1360.6	5435.35	4	-4	9.2229	-3.8682	O-linked glycosylation
11971	11972	47.4968	HYTNPSQDVTVPCPVPSTPPTPSPSTPPTPSPSCCHPR	gi|31615935	1460.53	N4H4F0S0G0	1120.69	5597.41	5	-2	9.1755	-0.805	O-linked glycosylation
13622	13629	52.1433	HYTNPSQDVTVPCPVPSTPPTPSPSTPPTPSPSCCHPR	gi|31615935	1590.59	N4H3F2S0G0	1146.3	5727.46	5	0	9.1317	-3.2831	O-linked glycosylation
12244	12247	48.2675	HYTNPSQDVTVPCPVPSTPPTPSPSTPPTPSPSCCHPR	gi|31615935	1095.4	N3H3F0S0G0	1309.58	5232.29	4	-3	8.2312	0.41271	O-linked glycosylation
15572	15573	57.6062	HYTNPSQDVTVPCPVPSTPPTPSPSTPPTPSPSCCHPR	gi|31615935	1677.59	N3H3F0S2G0	1455.38	5814.48	4	-4	8.2238	0.57048	O-linked glycosylation
11789	11793	46.9937	HYTNPSQDVTVPCPVPSTPPTPSPSTPPTPSPSCCHPR	gi|31615935	1460.53	N4H4F0S0G0	1400.61	5597.43	4	-2	8.2005	1.1818	O-linked glycosylation
11945	11946	47.4238	HYTNPSQDVTVPCPVPSTPPTPSPSTPPTPSPSCCHPR	gi|31615935	1501.56	N5H3F0S0G0	1411.37	5638.43	4	-4	8.1971	-2.0498	O-linked glycosylation
12153	12165	48.0353	HYTNPSQDVTVPCPVPSTPPTPSPSTPPTPSPSCCHPR	gi|31615935	1298.48	N4H3F0S0G0	1360.35	5435.38	4	-3	8.1897	2.3187	O-linked glycosylation
11880	11891	47.2675	HYTNPSQDVTVPCPVPSTPPTPSPSTPPTPSPSCCHPR	gi|31615935	1460.53	N4H4F0S0G0	934.078	5597.42	6	-2	8.1863	0.98105	O-linked glycosylation
12673	12677	49.4727	HYTNPSQDVTVPCPVPSTPPTPSPSTPPTPSPSCCHPR	gi|31615935	1136.42	N4H2F0S0G0	1056.07	5273.32	5	-3	8.1743	0.27038	O-linked glycosylation
12556	12561	49.1473	HYTNPSQDVTVPCPVPSTPPTPSPSTPPTPSPSCCHPR	gi|31615935	933.344	N3H2F0S0G0	1015.26	5070.24	5	-2	8.1647	0.60449	O-linked glycosylation
13336	13347	51.3508	HYTNPSQDVTVPCPVPSTPPTPSPSTPPTPSPSCCHPR	gi|31615935	1751.62	N4H4F0S1G0	982.764	5888.53	6	-3	8.164	3.2129	O-linked glycosylation
11620	11621	46.5107	HYTNPSQDVTVPCPVPSTPPTPSPSTPPTPSPSCCHPR	gi|31615935	1517.58	N3H2F4S0G0	1414.87	5654.44	4	-2	7.2412	-4.4808	O-linked glycosylation
15806	15808	58.265	HYTNPSQDVTVPCPVPSTPPTPSPSTPPTPSPSCCHPR	gi|31615935	2042.72	N4H4F0S2G0	1237.53	6179.58	5	-4	7.2166	-4.5021	O-linked glycosylation
14129	14130	53.5545	HYTNPSQDVTVPCPVPSTPPTPSPSTPPTPSPSCCHPR	gi|31615935	1752.64	N4H4F2S0G0	1473.88	5889.49	4	-3	7.1971	-7.8331	O-linked glycosylation
13544	13552	51.9275	HYTNPSQDVTVPCPVPSTPPTPSPSTPPTPSPSCCHPR	gi|31615935	1386.49	N3H3F0S1G0	1106.49	5523.38	5	-5	7.1852	-0.019786	O-linked glycosylation
14649	14650	55.0133	HYTNPSQDVTVPCPVPSTPPTPSPSTPPTPSPSCCHPR	gi|31615935	1590.59	N4H3F2S0G0	1433.37	5727.44	4	-3	7.1835	-7.5318	O-linked glycosylation
12361	12362	48.5898	HYTNPSQDVTVPCPVPSTPPTPSPSTPPTPSPSCCHPR	gi|31615935	1460.53	N4H4F0S0G0	1400.86	5597.42	4	-3	7.1736	-0.55159	O-linked glycosylation
13947	13949	53.0448	HYTNPSQDVTVPCPVPSTPPTPSPSTPPTPSPSCCHPR	gi|31615935	1751.62	N4H4F0S1G0	1179.11	5888.48	5	-3	7.1731	-5.0771	O-linked glycosylation
12088	12096	47.8425	HYTNPSQDVTVPCPVPSTPPTPSPSTPPTPSPSCCHPR	gi|31615935	1095.4	N3H3F0S0G0	1047.67	5232.29	5	-2	7.1605	0.72487	O-linked glycosylation
15988	15990	58.7765	HYTNPSQDVTVPCPVPSTPPTPSPSTPPTPSPSCCHPR	gi|31615935	2043.74	N4H4F2S1G0	1236.92	6180.59	5	0	7.1586	-7.2439	O-linked glycosylation
13245	13253	51.0877	HYTNPSQDVTVPCPVPSTPPTPSPSTPPTPSPSCCHPR	gi|31615935	771.291	N3H1F0S0G0	1228.56	4908.19	4	-3	7.1533	1.0636	O-linked glycosylation
15052	15056	56.1533	HYTNPSQDVTVPCPVPSTPPTPSPSTPPTPSPSCCHPR	gi|31615935	2042.72	N4H4F0S2G0	1546.41	6179.6	4	-3	6.2326	-2.2189	O-linked glycosylation
12712	12715	49.579	HYTNPSQDVTVPCPVPSTPPTPSPSTPPTPSPSCCHPR	gi|31615935	1298.48	N4H3F0S0G0	1360.6	5435.34	4	-4	6.1906	-4.3174	O-linked glycosylation
14467	14469	54.5047	HYTNPSQDVTVPCPVPSTPPTPSPSTPPTPSPSCCHPR	gi|31615935	1590.59	N4H3F2S0G0	1433.37	5727.44	4	-3	6.174	-7.6171	O-linked glycosylation
13180	13188	50.9058	HYTNPSQDVTVPCPVPSTPPTPSPSTPPTPSPSCCHPR	gi|31615935	1751.62	N4H4F0S1G0	1179.11	5888.51	5	-3	6.1732	-1.3456	O-linked glycosylation
14025	14033	53.2803	HYTNPSQDVTVPCPVPSTPPTPSPSTPPTPSPSCCHPR	gi|31615935	1224.44	N3H2F0S1G0	1341.84	5361.32	4	-3	6.1627	-1.6232	O-linked glycosylation
12309	12318	48.4655	HYTNPSQDVTVPCPVPSTPPTPSPSTPPTPSPSCCHPR	gi|31615935	1371.52	N3H2F3S0G0	1102.48	5508.38	5	0	6.1536	-5.7037	O-linked glycosylation
15416	15424	57.1858	HYTNPSQDVTVPCPVPSTPPTPSPSTPPTPSPSCCHPR	gi|31615935	2042.72	N4H4F0S2G0	1237.33	6179.59	5	-3	6.1489	-2.8333	O-linked glycosylation
12582	12584	49.2125	HYTNPSQDVTVPCPVPSTPPTPSPSTPPTPSPSCCHPR	gi|31615935	1298.48	N4H3F0S0G0	1088.28	5435.36	5	-2	6.1484	-0.68217	O-linked glycosylation
12569	12577	49.1913	HYTNPSQDVTVPCPVPSTPPTPSPSTPPTPSPSCCHPR	gi|31615935	1501.56	N5H3F0S0G0	1129.5	5638.44	5	-5	6.1207	-1.846	O-linked glycosylation
11776	11788	46.978	HYTNPSQDVTVPCPVPSTPPTPSPSTPPTPSPSCCHPR	gi|31615935	1460.53	N4H4F0S0G0	1120.69	5597.43	5	-2	6.1045	1.812	O-linked glycosylation
13518	13525	51.8517	HYTNPSQDVTVPCPVPSTPPTPSPSTPPTPSPSCCHPR	gi|31615935	1386.49	N3H3F0S1G0	1382.1	5523.36	4	-2	5.2327	-4.6045	O-linked glycosylation
13570	13571	51.982	HYTNPSQDVTVPCPVPSTPPTPSPSTPPTPSPSCCHPR	gi|31615935	1751.62	N4H4F0S1G0	1473.63	5888.5	4	-3	5.1929	-2.0483	O-linked glycosylation
14506	14508	54.6143	HYTNPSQDVTVPCPVPSTPPTPSPSTPPTPSPSCCHPR	gi|31615935	1387.51	N3H3F2S0G0	1382.6	5524.36	4	-3	5.1898	-8.0198	O-linked glycosylation
11620	11627	46.5263	HYTNPSQDVTVPCPVPSTPPTPSPSTPPTPSPSCCHPR	gi|31615935	1517.58	N3H2F4S0G0	1132.5	5654.44	5	-4	5.1817	-4.6766	O-linked glycosylation
15039	15042	56.1143	HYTNPSQDVTVPCPVPSTPPTPSPSTPPTPSPSCCHPR	gi|31615935	2083.75	N5H3F0S2G0	1556.67	6220.63	4	-3	5.1654	-1.0642	O-linked glycosylation
14402	14407	54.3302	HYTNPSQDVTVPCPVPSTPPTPSPSTPPTPSPSCCHPR	gi|31615935	1590.59	N4H3F2S0G0	1146.89	5727.43	5	-3	5.146	-9.7505	O-linked glycosylation
13557	13563	51.9587	HYTNPSQDVTVPCPVPSTPPTPSPSTPPTPSPSCCHPR	gi|31615935	1751.62	N4H4F0S1G0	1178.91	5888.51	5	-2	5.1434	-0.73446	O-linked glycosylation
14038	14047	53.3195	HYTNPSQDVTVPCPVPSTPPTPSPSTPPTPSPSCCHPR	gi|31615935	1224.44	N3H2F0S1G0	1073.47	5361.33	5	-2	5.1425	0.32083	O-linked glycosylation
15234	15235	56.6572	HYTNPSQDVTVPCPVPSTPPTPSPSTPPTPSPSCCHPR	gi|31615935	2042.72	N4H4F0S2G0	1237.33	6179.62	5	-3	5.1401	1.6113	O-linked glycosylation
13908	13910	52.935	HYTNPSQDVTVPCPVPSTPPTPSPSTPPTPSPSCCHPR	gi|31615935	1589.57	N4H3F0S1G0	1433.37	5726.45	4	-4	5.1284	-1.9133	O-linked glycosylation
15065	15073	56.2	HYTNPSQDVTVPCPVPSTPPTPSPSTPPTPSPSCCHPR	gi|31615935	2043.74	N4H4F2S1G0	1031.11	6180.61	6	-1	5.1023	-3.2921	O-linked glycosylation
27350	27351	90.6978	IEETTMTTQTPAPIQAPSAILPLPGQSVER	gi|262050538, gi|31542984	1021.36	N2H2F0S1G0	1055.01	4214.01	4	-3	24.4996	0.34567	O-linked glycosylation
27168	27169	90.1852	IEETTMTTQTPAPIQAPSAILPLPGQSVER	gi|262050538, gi|31542984	1021.36	N2H2F0S1G0	1054.26	4214.01	4	0	17.5514	1.8071	O-linked glycosylation
32602	32603	105.505	IEETTMTTQTPAPIQAPSAILPLPGQSVER	gi|262050538, gi|31542984	1312.46	N2H2F0S2G0	1127.53	4505.09	4	-2	15.4968	-1.4659	O-linked glycosylation
27116	27121	90.0492	IEETTMTTQTPAPIQAPSAILPLPGQSVER	gi|262050538, gi|31542984	656.228	N1H1F0S1G0	963.977	3848.87	4	-4	14.5118	-0.46202	O-linked glycosylation
27805	27809	91.986	IEETTMTTQTPAPIQAPSAILPLPGQSVER	gi|262050538, gi|31542984	656.228	N1H1F0S1G0	963.476	3848.87	4	-2	14.4833	0.26636	O-linked glycosylation
31926	31929	103.605	IEETTMTTQTPAPIQAPSAILPLPGQSVER	gi|262050538, gi|31542984	947.323	N1H1F0S2G0	1036.25	4139.97	4	-2	14.441	0.96954	O-linked glycosylation
32498	32506	105.231	IEETTMTTQTPAPIQAPSAILPLPGQSVER	gi|262050538, gi|31542984	1312.46	N2H2F0S2G0	902.228	4505.1	5	-2	13.4849	0.5635	O-linked glycosylation
27298	27301	90.5565	IEETTMTTQTPAPIQAPSAILPLPGQSVER	gi|262050538, gi|31542984	1021.36	N2H2F0S1G0	1406.01	4214.01	3	-2	12.6609	-0.21672	O-linked glycosylation
23489	23492	79.841	IEETTMTTQTPAPIQAPSAILPLPGQSVER	gi|262050538, gi|31542984	365.132	N1H1F0S0G0	890.451	3557.78	4	-1	12.5183	-0.1579	O-linked glycosylation
28078	28080	92.7477	IEETTMTTQTPAPIQAPSAILPLPGQSVER	gi|262050538, gi|31542984	1021.36	N2H2F0S1G0	1055	4213.98	4	-3	12.4129	-4.9844	O-linked glycosylation
27714	27715	91.7215	IEETTMTTQTPAPIQAPSAILPLPGQSVER	gi|262050538, gi|31542984	1021.36	N2H2F0S1G0	1054.76	4213.99	4	-2	11.5596	-2.682	O-linked glycosylation
26973	26979	89.6498	IEETTMTTQTPAPIQAPSAILPLPGQSVER	gi|262050538, gi|31542984	1021.36	N2H2F0S1G0	1054.76	4214.01	4	-2	11.526	0.67831	O-linked glycosylation
33148	33150	107.049	IEETTMTTQTPAPIQAPSAILPLPGQSVER	gi|262050538, gi|31542984	1313.48	N2H2F2S1G0	1127.78	4506.1	4	-2	11.4398	-5.5593	O-linked glycosylation
27116	27123	90.0543	IEETTMTTQTPAPIQAPSAILPLPGQSVER	gi|262050538, gi|31542984	656.228	N1H1F0S1G0	1284.3	3848.87	3	-2	10.5992	-1.3479	O-linked glycosylation
27532	27533	91.2092	IEETTMTTQTPAPIQAPSAILPLPGQSVER	gi|262050538, gi|31542984	1021.36	N2H2F0S1G0	1054.26	4214	4	0	10.5565	-1.4373	O-linked glycosylation
27896	27898	92.2367	IEETTMTTQTPAPIQAPSAILPLPGQSVER	gi|262050538, gi|31542984	1022.38	N2H2F2S0G0	1055.01	4215	4	-2	10.5027	-6.2469	O-linked glycosylation
23073	23078	78.6755	IEETTMTTQTPAPIQAPSAILPLPGQSVER	gi|262050538, gi|31542984	730.264	N2H2F0S0G0	1308.64	3922.91	3	-1	9.637	-0.85516	O-linked glycosylation
22852	22861	78.0663	IEETTMTTQTPAPIQAPSAILPLPGQSVER	gi|262050538, gi|31542984	730.264	N2H2F0S0G0	1308.98	3922.91	3	-2	9.5957	-0.55901	O-linked glycosylation
23476	23480	79.8072	IEETTMTTQTPAPIQAPSAILPLPGQSVER	gi|262050538, gi|31542984	365.132	N1H1F0S0G0	1186.93	3557.78	3	-1	9.5943	0.7377	O-linked glycosylation
27896	27905	92.2548	IEETTMTTQTPAPIQAPSAILPLPGQSVER	gi|262050538, gi|31542984	673.243	N1H2F1S0G0	967.483	3865.91	4	-1	9.5156	4.5641	O-linked glycosylation
28429	28437	93.7518	IEETTMTTQTPAPIQAPSAILPLPGQSVER	gi|262050538, gi|31542984	656.228	N1H1F0S1G0	963.973	3848.86	4	-4	9.464	-4.5216	O-linked glycosylation
31315	31323	101.892	IEETTMTTQTPAPIQAPSAILPLPGQSVER	gi|262050538, gi|31542984	1312.46	N2H2F0S2G0	1127.78	4505.1	4	-3	9.4164	0.065472	O-linked glycosylation
31978	31986	103.764	IEETTMTTQTPAPIQAPSAILPLPGQSVER	gi|262050538, gi|31542984	1312.46	N2H2F0S2G0	1128.04	4505.12	4	-4	7.4287	3.8729	O-linked glycosylation
27493	27500	91.1157	IEETTMTTQTPAPIQAPSAILPLPGQSVER	gi|262050538, gi|31542984	1021.36	N2H2F0S1G0	1406.01	4214	3	-2	6.49	-0.65124	O-linked glycosylation
23671	23682	80.3728	IEETTMTTQTPAPIQAPSAILPLPGQSVER	gi|262050538, gi|31542984	365.132	N1H1F0S0G0	1187.26	3557.77	3	-2	6.4645	-2.2296	O-linked glycosylation
27701	27705	91.6928	IEETTMTTQTPAPIQAPSAILPLPGQSVER	gi|262050538, gi|31542984	1022.38	N2H2F2S0G0	1406.34	4215	3	-2	5.5635	-6.3308	O-linked glycosylation
26570	26582	88.5308	IEETTMTTQTPAPIQAPSAILPLPGQSVER	gi|262050538, gi|31542984	1021.36	N2H2F0S1G0	1054.51	4214.01	4	-1	5.4756	1.2427	O-linked glycosylation
22930	22941	78.2917	IEETTMTTQTPAPIQAPSAILPLPGQSVER	gi|262050538, gi|31542984	714.269	N2H1F1S0G0	973.736	3890.92	4	-1	5.4657	-0.78505	O-linked glycosylation
27922	27934	92.3357	IEETTMTTQTPAPIQAPSAILPLPGQSVER	gi|262050538, gi|31542984	1022.38	N2H2F2S0G0	1406.34	4214.99	3	-2	5.456	-8.7635	O-linked glycosylation
26375	26382	87.9665	IEETTMTTQTPAPIQAPSAILPLPGQSVER	gi|262050538, gi|31542984	1021.36	N2H2F0S1G0	1054.51	4214.03	4	-1	5.3555	5.1823	O-linked glycosylation
11451	11452	46.039	ENISDPTSPLR	gi|21489959, gi|578809106, gi|578809108, gi|767931855, gi|767931858	2059.73	N4H5F1S1G0	1097.12	3288.35	3	-1	6.4282	0.3582	N-linked glycosylation
11464	11468	46.083	ENISDPTSPLR	gi|21489959, gi|578809106, gi|578809108, gi|767931855, gi|767931858	1710.6	N3H5F0S1G0	980.412	2939.22	3	0	5.5637	2.1345	N-linked glycosylation
11815	11822	47.0747	ENISDPTSPLR	gi|21489959, gi|578809106, gi|578809108, gi|767931855, gi|767931858	1694.6	N3H4F1S1G0	975.413	2923.22	3	-1	5.5117	0.50661	N-linked glycosylation
6901	6904	33.2727	IDSTGNVTNELR	gi|21450861, gi|21450863, gi|333440461, gi|530426019, gi|768014600	1216.42	N2H5F0S0G0	846.034	2535.08	3	-1	9.6142	-0.18228	N-linked glycosylation
14116	14128	53.5468	VFHIHNESWVLLTPK	gi|21450861, gi|21450863, gi|333440461, gi|530426019, gi|768014600	1216.42	N2H5F0S0G0	760.11	3036.41	4	-1	8.4729	1.3679	N-linked glycosylation
14168	14179	53.6893	VFHIHNESWVLLTPK	gi|21450861, gi|21450863, gi|333440461, gi|530426019, gi|768014600	1216.42	N2H5F0S0G0	1013.48	3036.41	3	-2	6.413	1.8351	N-linked glycosylation
14168	14178	53.6868	VFHIHNESWVLLTPK	gi|21450861, gi|21450863, gi|333440461, gi|530426019, gi|768014600	1581.56	N3H6F0S0G0	851.14	3401.54	4	0	6.3313	-0.91415	N-linked glycosylation
16534	16539	60.3207	VFHIHNESWVLLTPK	gi|21450861, gi|21450863, gi|333440461, gi|530426019, gi|768014600	1872.65	N3H6F0S1G0	924.168	3692.64	4	-1	6.283	2.1662	N-linked glycosylation
16807	16808	61.0765	VFHIHNESWVLLTPK	gi|21450861, gi|21450863, gi|333440461, gi|530426019, gi|768014600	1710.6	N3H5F0S1G0	883.651	3530.58	4	-1	6.1367	-2.2106	N-linked glycosylation
22228	22232	76.3008	EGDHEFLEVPEAQEDVEATFPVHQPGNYSCSYR	gi|21071030	1216.42	N2H5F0S0G0	1264.27	5053.05	4	-1	5.2811	-9.3062	N-linked glycosylation
4130	4142	25.1143	VTACHSSQPNATLYK	gi|205277441, gi|530422150, gi|578838460	1913.68	N4H5F0S1G0	1197.84	3590.49	3	-1	5.3985	1.3405	N-linked glycosylation
11919	11920	47.351	HANWTLTPLK	gi|19923106	1913.68	N4H5F0S1G0	1032.11	3094.33	3	0	12.3609	0.49259	N-linked glycosylation
8487	8496	37.7398	HANWTLTPLK	gi|19923106	1622.58	N4H5F0S0G0	935.082	2803.23	3	0	12.3293	0.60979	N-linked glycosylation
16053	16054	58.9567	HANWTLTPLK	gi|19923106	2204.77	N4H5F0S2G0	1129.48	3385.42	3	-1	9.3203	0.84688	N-linked glycosylation
8903	8906	38.8918	HANWTLTPLK	gi|19923106	1257.45	N3H4F0S0G0	813.372	2438.1	3	0	8.4935	0.8254	N-linked glycosylation
12088	12094	47.8373	HANWTLTPLK	gi|19923106	1548.54	N3H4F0S1G0	910.405	2729.2	3	0	7.4343	2.481	N-linked glycosylation
12283	12284	48.3715	HANWTLTPLK	gi|19923106	1548.54	N3H4F0S1G0	910.404	2729.2	3	0	7.4131	1.0721	N-linked glycosylation
8656	8657	38.193	HANWTLTPLK	gi|19923106	1622.58	N4H5F0S0G0	935.419	2803.24	3	-1	7.2962	3.1798	N-linked glycosylation
8461	8464	37.651	HANWTLTPLK	gi|19923106	1622.58	N4H5F0S0G0	935.421	2803.24	3	-1	7.2285	4.8128	N-linked glycosylation
12283	12285	48.374	HANWTLTPLK	gi|19923106	1913.68	N4H5F0S1G0	1032.11	3094.33	3	0	6.3726	0.25589	N-linked glycosylation
12101	12102	47.8607	HANWTLTPLK	gi|19923106	1913.68	N4H5F0S1G0	1032.45	3094.32	3	-1	6.3414	0.039595	N-linked glycosylation
11906	11917	47.3407	HANWTLTPLK	gi|19923106	1710.6	N3H5F0S1G0	964.419	2891.24	3	0	6.2654	-1.0373	N-linked glycosylation
12101	12103	47.8633	HANWTLTPLK	gi|19923106	1710.6	N3H5F0S1G0	964.42	2891.24	3	0	5.4149	-0.404	N-linked glycosylation
8721	8728	38.3915	HANWTLTPLK	gi|19923106	1257.45	N3H4F0S0G0	813.372	2438.1	3	0	5.3784	1.6515	N-linked glycosylation
11724	11727	46.8075	HANWTLTPLK	gi|19923106	1913.68	N4H5F0S1G0	1032.45	3094.33	3	-1	5.3369	0.39464	N-linked glycosylation
15884	15887	58.4862	HANWTLTPLK	gi|19923106	2204.77	N4H5F0S2G0	847.613	3385.42	4	-2	5.2975	0.64548	N-linked glycosylation
33291	33292	107.452	ADTHDEILEGLNFNLTEIPEAQIHEGFQELLR	gi|189163528, gi|189163530, gi|189163532, gi|189163534, gi|189163536, gi|189163538, gi|189163540, gi|189163542, gi|50363217, gi|50363219, gi|50363221	1913.68	N4H5F0S1G0	1402.89	5605.52	4	-3	34.4351	3.0012	N-linked glycosylation
35956	35957	115.015	ADTHDEILEGLNFNLTEIPEAQIHEGFQELLR	gi|189163528, gi|189163530, gi|189163532, gi|189163534, gi|189163536, gi|189163538, gi|189163540, gi|189163542, gi|50363217, gi|50363219, gi|50363221	2204.77	N4H5F0S2G0	1475.66	5896.59	4	-3	30.4396	-0.32499	N-linked glycosylation
35956	35958	115.018	ADTHDEILEGLNFNLTEIPEAQIHEGFQELLR	gi|189163528, gi|189163530, gi|189163532, gi|189163534, gi|189163536, gi|189163538, gi|189163540, gi|189163542, gi|50363217, gi|50363219, gi|50363221	2204.77	N4H5F0S2G0	1180.73	5896.6	5	-3	30.3725	1.2669	N-linked glycosylation
38295	38303	121.658	ADTHDEILEGLNFNLTEIPEAQIHEGFQELLR	gi|189163528, gi|189163530, gi|189163532, gi|189163534, gi|189163536, gi|189163538, gi|189163540, gi|189163542, gi|50363217, gi|50363219, gi|50363221	2861	N5H6F0S3G0	1311.97	6552.81	5	-3	30.325	-1.6822	N-linked glycosylation
38308	38312	121.683	ADTHDEILEGLNFNLTEIPEAQIHEGFQELLR	gi|189163528, gi|189163530, gi|189163532, gi|189163534, gi|189163536, gi|189163538, gi|189163540, gi|189163542, gi|50363217, gi|50363219, gi|50363221	3007.06	N5H6F1S3G0	1341.18	6698.87	5	-3	27.3211	-2.2162	N-linked glycosylation
33330	33331	107.563	ADTHDEILEGLNFNLTEIPEAQIHEGFQELLR	gi|189163528, gi|189163530, gi|189163532, gi|189163534, gi|189163536, gi|189163538, gi|189163540, gi|189163542, gi|50363217, gi|50363219, gi|50363221	1913.68	N4H5F0S1G0	1122.51	5605.51	5	-3	26.4191	1.5182	N-linked glycosylation
35800	35801	114.574	ADTHDEILEGLNFNLTEIPEAQIHEGFQELLR	gi|189163528, gi|189163530, gi|189163532, gi|189163534, gi|189163536, gi|189163538, gi|189163540, gi|189163542, gi|50363217, gi|50363219, gi|50363221	2569.9	N5H6F0S2G0	1253.75	6261.72	5	-3	26.3642	-0.71709	N-linked glycosylation
33148	33151	107.052	ADTHDEILEGLNFNLTEIPEAQIHEGFQELLR	gi|189163528, gi|189163530, gi|189163532, gi|189163534, gi|189163536, gi|189163538, gi|189163540, gi|189163542, gi|50363217, gi|50363219, gi|50363221	1913.68	N4H5F0S1G0	1122.31	5605.52	5	-2	25.3835	3.7935	N-linked glycosylation
38308	38311	121.681	ADTHDEILEGLNFNLTEIPEAQIHEGFQELLR	gi|189163528, gi|189163530, gi|189163532, gi|189163534, gi|189163536, gi|189163538, gi|189163540, gi|189163542, gi|50363217, gi|50363219, gi|50363221	2861	N5H6F0S3G0	1639.71	6552.81	4	-3	25.3625	-2.3882	N-linked glycosylation
30873	30876	100.628	ADTHDEILEGLNFNLTEIPEAQIHEGFQELLR	gi|189163528, gi|189163530, gi|189163532, gi|189163534, gi|189163536, gi|189163538, gi|189163540, gi|189163542, gi|50363217, gi|50363219, gi|50363221	1622.58	N4H5F0S0G0	1329.86	5314.41	4	-2	23.475	0.1566	N-linked glycosylation
38308	38313	121.686	ADTHDEILEGLNFNLTEIPEAQIHEGFQELLR	gi|189163528, gi|189163530, gi|189163532, gi|189163534, gi|189163536, gi|189163538, gi|189163540, gi|189163542, gi|50363217, gi|50363219, gi|50363221	3007.06	N5H6F1S3G0	1676.22	6698.86	4	-3	23.3491	-2.6699	N-linked glycosylation
34032	34033	109.555	YLGNATAIFFLPDEGK	gi|189163528, gi|189163530, gi|189163532, gi|189163534, gi|189163536, gi|189163538, gi|189163540, gi|189163542, gi|50363217, gi|50363219, gi|50363221	2204.77	N4H5F0S2G0	1321.56	3960.67	3	-2	23.3017	1.0861	N-linked glycosylation
23671	23672	80.3467	YLGNATAIFFLPDEGK	gi|189163528, gi|189163530, gi|189163532, gi|189163534, gi|189163536, gi|189163538, gi|189163540, gi|189163542, gi|50363217, gi|50363219, gi|50363221	1622.58	N4H5F0S0G0	1126.83	3378.49	3	0	22.4531	2.5379	N-linked glycosylation
28260	28261	93.2563	YLGNATAIFFLPDEGK	gi|189163528, gi|189163530, gi|189163532, gi|189163534, gi|189163536, gi|189163538, gi|189163540, gi|189163542, gi|50363217, gi|50363219, gi|50363221	1913.68	N4H5F0S1G0	918.401	3669.58	4	-1	22.4002	1.4682	N-linked glycosylation
28416	28417	93.697	YLGNATAIFFLPDEGK	gi|189163528, gi|189163530, gi|189163532, gi|189163534, gi|189163536, gi|189163538, gi|189163540, gi|189163542, gi|50363217, gi|50363219, gi|50363221	1913.68	N4H5F0S1G0	1223.86	3669.58	3	0	21.3475	1.5875	N-linked glycosylation
28234	28235	93.1835	YLGNATAIFFLPDEGK	gi|189163528, gi|189163530, gi|189163532, gi|189163534, gi|189163536, gi|189163538, gi|189163540, gi|189163542, gi|50363217, gi|50363219, gi|50363221	1913.68	N4H5F0S1G0	1223.87	3669.59	3	0	20.4147	5.5794	N-linked glycosylation
33668	33670	108.523	YLGNATAIFFLPDEGK	gi|189163528, gi|189163530, gi|189163532, gi|189163534, gi|189163536, gi|189163538, gi|189163540, gi|189163542, gi|50363217, gi|50363219, gi|50363221	2204.77	N4H5F0S2G0	991.425	3960.67	4	-2	20.3644	0.65147	N-linked glycosylation
38308	38319	121.702	ADTHDEILEGLNFNLTEIPEAQIHEGFQELLR	gi|189163528, gi|189163530, gi|189163532, gi|189163534, gi|189163536, gi|189163538, gi|189163540, gi|189163542, gi|50363217, gi|50363219, gi|50363221	2861	N5H6F0S3G0	1093.48	6552.81	6	-3	20.3052	-2.6155	N-linked glycosylation
33668	33669	108.521	YLGNATAIFFLPDEGK	gi|189163528, gi|189163530, gi|189163532, gi|189163534, gi|189163536, gi|189163538, gi|189163540, gi|189163542, gi|50363217, gi|50363219, gi|50363221	2204.77	N4H5F0S2G0	1321.56	3960.67	3	-2	19.3553	0.34642	N-linked glycosylation
35865	35869	114.766	ADTHDEILEGLNFNLTEIPEAQIHEGFQELLR	gi|189163528, gi|189163530, gi|189163532, gi|189163534, gi|189163536, gi|189163538, gi|189163540, gi|189163542, gi|50363217, gi|50363219, gi|50363221	2222.81	N4H6F3S0G0	1183.73	5914.63	5	0	17.423	0.024614	N-linked glycosylation
33850	33851	109.037	YLGNATAIFFLPDEGK	gi|189163528, gi|189163530, gi|189163532, gi|189163534, gi|189163536, gi|189163538, gi|189163540, gi|189163542, gi|50363217, gi|50363219, gi|50363221	2204.77	N4H5F0S2G0	1321.56	3960.67	3	-2	17.294	-0.023423	N-linked glycosylation
35800	35802	114.577	ADTHDEILEGLNFNLTEIPEAQIHEGFQELLR	gi|189163528, gi|189163530, gi|189163532, gi|189163534, gi|189163536, gi|189163538, gi|189163540, gi|189163542, gi|50363217, gi|50363219, gi|50363221	2569.9	N5H6F0S2G0	1566.94	6261.72	4	-3	15.408	-1.3779	N-linked glycosylation
33161	33162	107.084	ADTHDEILEGLNFNLTEIPEAQIHEGFQELLR	gi|189163528, gi|189163530, gi|189163532, gi|189163534, gi|189163536, gi|189163538, gi|189163540, gi|189163542, gi|50363217, gi|50363219, gi|50363221	2278.81	N5H6F0S1G0	1494.42	5970.63	4	-4	15.3617	-1.1582	N-linked glycosylation
34032	34034	109.558	YLGNATAIFFLPDEGK	gi|189163528, gi|189163530, gi|189163532, gi|189163534, gi|189163536, gi|189163538, gi|189163540, gi|189163542, gi|50363217, gi|50363219, gi|50363221	2204.77	N4H5F0S2G0	991.426	3960.67	4	-2	15.3387	1.2062	N-linked glycosylation
33161	33163	107.086	ADTHDEILEGLNFNLTEIPEAQIHEGFQELLR	gi|189163528, gi|189163530, gi|189163532, gi|189163534, gi|189163536, gi|189163538, gi|189163540, gi|189163542, gi|50363217, gi|50363219, gi|50363221	2278.81	N5H6F0S1G0	1195.53	5970.63	5	-3	15.3177	-0.78237	N-linked glycosylation
33486	33489	108.011	YLGNATAIFFLPDEGK	gi|189163528, gi|189163530, gi|189163532, gi|189163534, gi|189163536, gi|189163538, gi|189163540, gi|189163542, gi|50363217, gi|50363219, gi|50363221	2204.77	N4H5F0S2G0	991.176	3960.68	4	-1	15.2895	1.8684	N-linked glycosylation
23853	23854	80.8583	YLGNATAIFFLPDEGK	gi|189163528, gi|189163530, gi|189163532, gi|189163534, gi|189163536, gi|189163538, gi|189163540, gi|189163542, gi|50363217, gi|50363219, gi|50363221	1622.58	N4H5F0S0G0	1126.83	3378.48	3	0	14.4455	1.6707	N-linked glycosylation
28962	28963	95.239	YLGNATAIFFLPDEGK	gi|189163528, gi|189163530, gi|189163532, gi|189163534, gi|189163536, gi|189163538, gi|189163540, gi|189163542, gi|50363217, gi|50363219, gi|50363221	1913.68	N4H5F0S1G0	1223.86	3669.58	3	0	14.3969	1.6873	N-linked glycosylation
28598	28599	94.2112	YLGNATAIFFLPDEGK	gi|189163528, gi|189163530, gi|189163532, gi|189163534, gi|189163536, gi|189163538, gi|189163540, gi|189163542, gi|50363217, gi|50363219, gi|50363221	1913.68	N4H5F0S1G0	1223.86	3669.58	3	0	14.3812	1.1883	N-linked glycosylation
35605	35611	114.038	ADTHDEILEGLNFNLTEIPEAQIHEGFQELLR	gi|189163528, gi|189163530, gi|189163532, gi|189163534, gi|189163536, gi|189163538, gi|189163540, gi|189163542, gi|50363217, gi|50363219, gi|50363221	2569.9	N5H6F0S2G0	1253.75	6261.72	5	-3	14.3592	-1.0095	N-linked glycosylation
33850	33852	109.04	YLGNATAIFFLPDEGK	gi|189163528, gi|189163530, gi|189163532, gi|189163534, gi|189163536, gi|189163538, gi|189163540, gi|189163542, gi|50363217, gi|50363219, gi|50363221	2204.77	N4H5F0S2G0	990.924	3960.67	4	0	14.3199	1.4209	N-linked glycosylation
36320	36322	116.049	ADTHDEILEGLNFNLTEIPEAQIHEGFQELLR	gi|189163528, gi|189163530, gi|189163532, gi|189163534, gi|189163536, gi|189163538, gi|189163540, gi|189163542, gi|50363217, gi|50363219, gi|50363221	2204.77	N4H5F0S2G0	1180.93	5896.58	5	-4	14.3128	-2.5522	N-linked glycosylation
37048	37049	118.104	ADTHDEILEGLNFNLTEIPEAQIHEGFQELLR	gi|189163528, gi|189163530, gi|189163532, gi|189163534, gi|189163536, gi|189163538, gi|189163540, gi|189163542, gi|50363217, gi|50363219, gi|50363221	2205.79	N4H5F2S1G0	1475.9	5897.58	4	-3	14.2237	-6.2678	N-linked glycosylation
28780	28781	94.7253	YLGNATAIFFLPDEGK	gi|189163528, gi|189163530, gi|189163532, gi|189163534, gi|189163536, gi|189163538, gi|189163540, gi|189163542, gi|50363217, gi|50363219, gi|50363221	1913.68	N4H5F0S1G0	1224.2	3669.58	3	-1	13.3972	1.6047	N-linked glycosylation
33096	33107	106.925	ADTHDEILEGLNFNLTEIPEAQIHEGFQELLR	gi|189163528, gi|189163530, gi|189163532, gi|189163534, gi|189163536, gi|189163538, gi|189163540, gi|189163542, gi|50363217, gi|50363219, gi|50363221	1913.68	N4H5F0S1G0	1403.14	5605.5	4	-4	13.2968	0.39928	N-linked glycosylation
35735	35737	114.393	ADTHDEILEGLNFNLTEIPEAQIHEGFQELLR	gi|189163528, gi|189163530, gi|189163532, gi|189163534, gi|189163536, gi|189163538, gi|189163540, gi|189163542, gi|50363217, gi|50363219, gi|50363221	2715.96	N5H6F1S2G0	1603.2	6407.78	4	-2	12.4419	-1.4767	N-linked glycosylation
29144	29145	95.7512	YLGNATAIFFLPDEGK	gi|189163528, gi|189163530, gi|189163532, gi|189163534, gi|189163536, gi|189163538, gi|189163540, gi|189163542, gi|50363217, gi|50363219, gi|50363221	1913.68	N4H5F0S1G0	1224.2	3669.58	3	-1	12.359	0.80635	N-linked glycosylation
34344	34345	110.444	ADTHDEILEGLNFNLTEIPEAQIHEGFQELLR	gi|189163528, gi|189163530, gi|189163532, gi|189163534, gi|189163536, gi|189163538, gi|189163540, gi|189163542, gi|50363217, gi|50363219, gi|50363221	1914.7	N4H5F2S0G0	1402.88	5606.49	4	-2	12.2559	-6.3972	N-linked glycosylation
37048	37050	118.107	ADTHDEILEGLNFNLTEIPEAQIHEGFQELLR	gi|189163528, gi|189163530, gi|189163532, gi|189163534, gi|189163536, gi|189163538, gi|189163540, gi|189163542, gi|50363217, gi|50363219, gi|50363221	2205.79	N4H5F2S1G0	1180.72	5897.59	5	-2	12.1986	-5.2457	N-linked glycosylation
24035	24036	81.3708	YLGNATAIFFLPDEGK	gi|189163528, gi|189163530, gi|189163532, gi|189163534, gi|189163536, gi|189163538, gi|189163540, gi|189163542, gi|50363217, gi|50363219, gi|50363221	1622.58	N4H5F0S0G0	1127.17	3378.48	3	-1	11.3989	-0.15333	N-linked glycosylation
28442	28443	93.7705	YLGNATAIFFLPDEGK	gi|189163528, gi|189163530, gi|189163532, gi|189163534, gi|189163536, gi|189163538, gi|189163540, gi|189163542, gi|50363217, gi|50363219, gi|50363221	1913.68	N4H5F0S1G0	918.402	3669.58	4	-1	11.3873	2.2001	N-linked glycosylation
36320	36321	116.046	ADTHDEILEGLNFNLTEIPEAQIHEGFQELLR	gi|189163528, gi|189163530, gi|189163532, gi|189163534, gi|189163536, gi|189163538, gi|189163540, gi|189163542, gi|50363217, gi|50363219, gi|50363221	2205.79	N4H5F2S1G0	1475.9	5897.58	4	-3	11.3488	-6.7645	N-linked glycosylation
34578	34579	111.109	YLGNATAIFFLPDEGK	gi|189163528, gi|189163530, gi|189163532, gi|189163534, gi|189163536, gi|189163538, gi|189163540, gi|189163542, gi|50363217, gi|50363219, gi|50363221	2204.77	N4H5F0S2G0	1321.56	3960.66	3	-2	11.3384	-0.94804	N-linked glycosylation
34214	34215	110.073	YLGNATAIFFLPDEGK	gi|189163528, gi|189163530, gi|189163532, gi|189163534, gi|189163536, gi|189163538, gi|189163540, gi|189163542, gi|50363217, gi|50363219, gi|50363221	2204.77	N4H5F0S2G0	1320.89	3960.67	3	0	11.3301	0.12962	N-linked glycosylation
34396	34397	110.591	YLGNATAIFFLPDEGK	gi|189163528, gi|189163530, gi|189163532, gi|189163534, gi|189163536, gi|189163538, gi|189163540, gi|189163542, gi|50363217, gi|50363219, gi|50363221	2204.77	N4H5F0S2G0	1321.56	3960.67	3	-2	11.3208	0.43889	N-linked glycosylation
34214	34216	110.076	YLGNATAIFFLPDEGK	gi|189163528, gi|189163530, gi|189163532, gi|189163534, gi|189163536, gi|189163538, gi|189163540, gi|189163542, gi|50363217, gi|50363219, gi|50363221	2204.77	N4H5F0S2G0	991.174	3960.67	4	-1	11.2793	0.1424	N-linked glycosylation
23541	23550	80.0027	YLGNATAIFFLPDEGK	gi|189163528, gi|189163530, gi|189163532, gi|189163534, gi|189163536, gi|189163538, gi|189163540, gi|189163542, gi|50363217, gi|50363219, gi|50363221	1622.58	N4H5F0S0G0	845.627	3378.48	4	-1	10.4596	0.78239	N-linked glycosylation
29326	29327	96.2637	YLGNATAIFFLPDEGK	gi|189163528, gi|189163530, gi|189163532, gi|189163534, gi|189163536, gi|189163538, gi|189163540, gi|189163542, gi|50363217, gi|50363219, gi|50363221	1913.68	N4H5F0S1G0	1224.53	3669.56	3	-2	10.3747	-2.8689	N-linked glycosylation
34591	34592	111.146	YLGNATAIFFLPDEGK	gi|189163528, gi|189163530, gi|189163532, gi|189163534, gi|189163536, gi|189163538, gi|189163540, gi|189163542, gi|50363217, gi|50363219, gi|50363221	2204.77	N4H5F0S2G0	991.175	3960.67	4	-1	10.2534	1.6834	N-linked glycosylation
29885	29889	97.8443	ADTHDEILEGLNFNLTEIPEAQIHEGFQELLR	gi|189163528, gi|189163530, gi|189163532, gi|189163534, gi|189163536, gi|189163538, gi|189163540, gi|189163542, gi|50363217, gi|50363219, gi|50363221	1913.68	N4H5F0S1G0	1122.71	5605.52	5	-4	10.1909	2.7272	N-linked glycosylation
33473	33479	107.982	YLGNATAIFFLPDEGK	gi|189163528, gi|189163530, gi|189163532, gi|189163534, gi|189163536, gi|189163538, gi|189163540, gi|189163542, gi|50363217, gi|50363219, gi|50363221	2204.77	N4H5F0S2G0	1320.89	3960.65	3	0	10.1633	-4.6784	N-linked glycosylation
28091	28097	92.7953	YLGNATAIFFLPDEGK	gi|189163528, gi|189163530, gi|189163532, gi|189163534, gi|189163536, gi|189163538, gi|189163540, gi|189163542, gi|50363217, gi|50363219, gi|50363221	1913.68	N4H5F0S1G0	1835.79	3669.57	2	-1	9.435	-1.2527	N-linked glycosylation
28702	28703	94.5043	YLGNATAIFFLPDEGK	gi|189163528, gi|189163530, gi|189163532, gi|189163534, gi|189163536, gi|189163538, gi|189163540, gi|189163542, gi|50363217, gi|50363219, gi|50363221	1548.54	N3H4F0S1G0	1102.82	3304.45	3	-2	9.3901	1.505	N-linked glycosylation
28039	28047	92.654	YLGNATAIFFLPDEGK	gi|189163528, gi|189163530, gi|189163532, gi|189163534, gi|189163536, gi|189163538, gi|189163540, gi|189163542, gi|50363217, gi|50363219, gi|50363221	1913.68	N4H5F0S1G0	1224.2	3669.59	3	-1	9.3561	4.2992	N-linked glycosylation
33746	33750	108.749	YLGNATAIFFLPDEGK	gi|189163528, gi|189163530, gi|189163532, gi|189163534, gi|189163536, gi|189163538, gi|189163540, gi|189163542, gi|50363217, gi|50363219, gi|50363221	2350.83	N4H5F1S2G0	1028.19	4106.73	4	-3	9.354	1.4665	N-linked glycosylation
34942	34943	112.144	YLGNATAIFFLPDEGK	gi|189163528, gi|189163530, gi|189163532, gi|189163534, gi|189163536, gi|189163538, gi|189163540, gi|189163542, gi|50363217, gi|50363219, gi|50363221	2204.77	N4H5F0S2G0	1321.57	3960.68	3	-2	9.327	2.8429	N-linked glycosylation
34760	34761	111.626	YLGNATAIFFLPDEGK	gi|189163528, gi|189163530, gi|189163532, gi|189163534, gi|189163536, gi|189163538, gi|189163540, gi|189163542, gi|50363217, gi|50363219, gi|50363221	2204.77	N4H5F0S2G0	1321.56	3960.66	3	-2	9.3049	-2.335	N-linked glycosylation
36138	36140	115.533	ADTHDEILEGLNFNLTEIPEAQIHEGFQELLR	gi|189163528, gi|189163530, gi|189163532, gi|189163534, gi|189163536, gi|189163538, gi|189163540, gi|189163542, gi|50363217, gi|50363219, gi|50363221	2204.77	N4H5F0S2G0	1180.73	5896.6	5	-3	9.2435	1.0599	N-linked glycosylation
28065	28072	92.7245	YLGNATAIFFLPDEGK	gi|189163528, gi|189163530, gi|189163532, gi|189163534, gi|189163536, gi|189163538, gi|189163540, gi|189163542, gi|50363217, gi|50363219, gi|50363221	1913.68	N4H5F0S1G0	918.403	3669.59	4	-1	8.3794	3.5307	N-linked glycosylation
28533	28535	94.0298	YLGNATAIFFLPDEGK	gi|189163528, gi|189163530, gi|189163532, gi|189163534, gi|189163536, gi|189163538, gi|189163540, gi|189163542, gi|50363217, gi|50363219, gi|50363221	1751.62	N4H4F0S1G0	1169.85	3507.53	3	0	8.3696	1.5752	N-linked glycosylation
28507	28512	93.9647	YLGNATAIFFLPDEGK	gi|189163528, gi|189163530, gi|189163532, gi|189163534, gi|189163536, gi|189163538, gi|189163540, gi|189163542, gi|50363217, gi|50363219, gi|50363221	1548.54	N3H4F0S1G0	1102.49	3304.45	3	-1	8.3664	3.924	N-linked glycosylation
24217	24218	81.8812	YLGNATAIFFLPDEGK	gi|189163528, gi|189163530, gi|189163532, gi|189163534, gi|189163536, gi|189163538, gi|189163540, gi|189163542, gi|50363217, gi|50363219, gi|50363221	1622.58	N4H5F0S0G0	1127.16	3378.47	3	-1	8.3397	-3.08	N-linked glycosylation
35683	35686	114.249	ADTHDEILEGLNFNLTEIPEAQIHEGFQELLR	gi|189163528, gi|189163530, gi|189163532, gi|189163534, gi|189163536, gi|189163538, gi|189163540, gi|189163542, gi|50363217, gi|50363219, gi|50363221	2350.79	N2H12F0S0G0	1512.17	6042.66	4	-3	8.3145	6.6354	N-linked glycosylation
35605	35613	114.043	ADTHDEILEGLNFNLTEIPEAQIHEGFQELLR	gi|189163528, gi|189163530, gi|189163532, gi|189163534, gi|189163536, gi|189163538, gi|189163540, gi|189163542, gi|50363217, gi|50363219, gi|50363221	2569.9	N5H6F0S2G0	1567.45	6261.74	4	-5	8.3118	2.3852	N-linked glycosylation
36502	36504	116.563	ADTHDEILEGLNFNLTEIPEAQIHEGFQELLR	gi|189163528, gi|189163530, gi|189163532, gi|189163534, gi|189163536, gi|189163538, gi|189163540, gi|189163542, gi|50363217, gi|50363219, gi|50363221	2204.77	N4H5F0S2G0	1181.13	5896.59	5	-5	8.2504	-1.8169	N-linked glycosylation
35982	35984	115.091	ADTHDEILEGLNFNLTEIPEAQIHEGFQELLR	gi|189163528, gi|189163530, gi|189163532, gi|189163534, gi|189163536, gi|189163538, gi|189163540, gi|189163542, gi|50363217, gi|50363219, gi|50363221	2569.9	N5H6F0S2G0	1567.19	6261.72	4	-4	8.2175	-1.6018	N-linked glycosylation
35904	35909	114.879	ADTHDEILEGLNFNLTEIPEAQIHEGFQELLR	gi|189163528, gi|189163530, gi|189163532, gi|189163534, gi|189163536, gi|189163538, gi|189163540, gi|189163542, gi|50363217, gi|50363219, gi|50363221	2586.92	N5H7F1S1G0	1257.16	6278.76	5	-3	8.2108	2.9917	N-linked glycosylation
29508	29509	96.776	YLGNATAIFFLPDEGK	gi|189163528, gi|189163530, gi|189163532, gi|189163534, gi|189163536, gi|189163538, gi|189163540, gi|189163542, gi|50363217, gi|50363219, gi|50363221	1913.68	N4H5F0S1G0	1224.53	3669.58	3	-2	7.3362	2.1209	N-linked glycosylation
30236	30238	98.829	YLGNATAIFFLPDEGK	gi|189163528, gi|189163530, gi|189163532, gi|189163534, gi|189163536, gi|189163538, gi|189163540, gi|189163542, gi|50363217, gi|50363219, gi|50363221	1913.68	N4H5F0S1G0	1223.87	3669.59	3	0	7.3145	4.1822	N-linked glycosylation
35761	35769	114.482	ADTHDEILEGLNFNLTEIPEAQIHEGFQELLR	gi|189163528, gi|189163530, gi|189163532, gi|189163534, gi|189163536, gi|189163538, gi|189163540, gi|189163542, gi|50363217, gi|50363219, gi|50363221	2204.77	N4H5F0S2G0	1475.9	5896.58	4	-4	7.3106	-2.7985	N-linked glycosylation
36138	36139	115.531	ADTHDEILEGLNFNLTEIPEAQIHEGFQELLR	gi|189163528, gi|189163530, gi|189163532, gi|189163534, gi|189163536, gi|189163538, gi|189163540, gi|189163542, gi|50363217, gi|50363219, gi|50363221	2204.77	N4H5F0S2G0	1475.66	5896.6	4	-3	7.3021	1.3312	N-linked glycosylation
33707	33711	108.639	YLGNATAIFFLPDEGK	gi|189163528, gi|189163530, gi|189163532, gi|189163534, gi|189163536, gi|189163538, gi|189163540, gi|189163542, gi|50363217, gi|50363219, gi|50363221	2350.83	N4H5F1S2G0	1369.92	4106.74	3	-1	7.2866	2.6873	N-linked glycosylation
28624	28630	94.2975	YLGNATAIFFLPDEGK	gi|189163528, gi|189163530, gi|189163532, gi|189163534, gi|189163536, gi|189163538, gi|189163540, gi|189163542, gi|50363217, gi|50363219, gi|50363221	1913.68	N4H5F0S1G0	918.4	3669.57	4	-1	7.2796	0.20415	N-linked glycosylation
33967	33976	109.392	ADTHDEILEGLNFNLTEIPEAQIHEGFQELLR	gi|189163528, gi|189163530, gi|189163532, gi|189163534, gi|189163536, gi|189163538, gi|189163540, gi|189163542, gi|50363217, gi|50363219, gi|50363221	1914.7	N4H5F2S0G0	1403.13	5606.48	4	-3	7.2511	-6.9085	N-linked glycosylation
32953	32964	106.521	ADTHDEILEGLNFNLTEIPEAQIHEGFQELLR	gi|189163528, gi|189163530, gi|189163532, gi|189163534, gi|189163536, gi|189163538, gi|189163540, gi|189163542, gi|50363217, gi|50363219, gi|50363221	2424.87	N5H6F1S1G0	1530.68	6116.67	4	-3	7.2446	-3.7415	N-linked glycosylation
23723	23728	80.5027	YLGNATAIFFLPDEGK	gi|189163528, gi|189163530, gi|189163532, gi|189163534, gi|189163536, gi|189163538, gi|189163540, gi|189163542, gi|50363217, gi|50363219, gi|50363221	1460.53	N4H4F0S0G0	1073.15	3216.42	3	-1	7.244	-0.93764	N-linked glycosylation
35683	35691	114.262	ADTHDEILEGLNFNLTEIPEAQIHEGFQELLR	gi|189163528, gi|189163530, gi|189163532, gi|189163534, gi|189163536, gi|189163538, gi|189163540, gi|189163542, gi|50363217, gi|50363219, gi|50363221	2350.79	N2H12F0S0G0	1209.94	6042.66	5	-3	7.2308	7.7848	N-linked glycosylation
28338	28347	93.4972	YLGNATAIFFLPDEGK	gi|189163528, gi|189163530, gi|189163532, gi|189163534, gi|189163536, gi|189163538, gi|189163540, gi|189163542, gi|50363217, gi|50363219, gi|50363221	1751.62	N4H4F0S1G0	1170.52	3507.53	3	-2	7.2213	2.2376	N-linked glycosylation
34396	34402	110.605	YLGNATAIFFLPDEGK	gi|189163528, gi|189163530, gi|189163532, gi|189163534, gi|189163536, gi|189163538, gi|189163540, gi|189163542, gi|50363217, gi|50363219, gi|50363221	2204.77	N4H5F0S2G0	991.425	3960.67	4	-2	7.2004	0.77475	N-linked glycosylation
36684	36687	117.081	ADTHDEILEGLNFNLTEIPEAQIHEGFQELLR	gi|189163528, gi|189163530, gi|189163532, gi|189163534, gi|189163536, gi|189163538, gi|189163540, gi|189163542, gi|50363217, gi|50363219, gi|50363221	2205.79	N4H5F2S1G0	1180.73	5897.59	5	-2	7.1865	-4.9352	N-linked glycosylation
36346	36348	116.122	ADTHDEILEGLNFNLTEIPEAQIHEGFQELLR	gi|189163528, gi|189163530, gi|189163532, gi|189163534, gi|189163536, gi|189163538, gi|189163540, gi|189163542, gi|50363217, gi|50363219, gi|50363221	2570.93	N5H6F2S1G0	1253.95	6262.72	5	-3	7.1856	-4.0133	N-linked glycosylation
32940	32946	106.471	ADTHDEILEGLNFNLTEIPEAQIHEGFQELLR	gi|189163528, gi|189163530, gi|189163532, gi|189163534, gi|189163536, gi|189163538, gi|189163540, gi|189163542, gi|50363217, gi|50363219, gi|50363221	2424.87	N5H6F1S1G0	1224.54	6116.67	5	-2	7.1732	-3.694	N-linked glycosylation
25972	25975	86.8232	YLGNATAIFFLPDEGK	gi|189163528, gi|189163530, gi|189163532, gi|189163534, gi|189163536, gi|189163538, gi|189163540, gi|189163542, gi|50363217, gi|50363219, gi|50363221	2204.77	N4H5F0S2G0	991.176	3960.68	4	-1	7.1727	1.8067	N-linked glycosylation
34214	34219	110.084	ADTHDEILEGLNFNLTEIPEAQIHEGFQELLR	gi|189163528, gi|189163530, gi|189163532, gi|189163534, gi|189163536, gi|189163538, gi|189163540, gi|189163542, gi|50363217, gi|50363219, gi|50363221	1914.7	N4H5F2S0G0	1122.71	5606.5	5	-3	7.1624	-4.015	N-linked glycosylation
29690	29692	97.2903	YLGNATAIFFLPDEGK	gi|189163528, gi|189163530, gi|189163532, gi|189163534, gi|189163536, gi|189163538, gi|189163540, gi|189163542, gi|50363217, gi|50363219, gi|50363221	1913.68	N4H5F0S1G0	1224.2	3669.58	3	-1	6.2972	1.5049	N-linked glycosylation
28247	28252	93.2303	YLGNATAIFFLPDEGK	gi|189163528, gi|189163530, gi|189163532, gi|189163534, gi|189163536, gi|189163538, gi|189163540, gi|189163542, gi|50363217, gi|50363219, gi|50363221	2059.73	N4H5F1S1G0	1273.22	3815.63	3	-2	6.2921	-1.3616	N-linked glycosylation
30054	30056	98.3153	YLGNATAIFFLPDEGK	gi|189163528, gi|189163530, gi|189163532, gi|189163534, gi|189163536, gi|189163538, gi|189163540, gi|189163542, gi|50363217, gi|50363219, gi|50363221	1913.68	N4H5F0S1G0	1224.19	3669.56	3	-1	6.2893	-2.9859	N-linked glycosylation
30418	30421	99.3448	YLGNATAIFFLPDEGK	gi|189163528, gi|189163530, gi|189163532, gi|189163534, gi|189163536, gi|189163538, gi|189163540, gi|189163542, gi|50363217, gi|50363219, gi|50363221	1913.68	N4H5F0S1G0	1223.87	3669.58	3	0	6.2823	3.0845	N-linked glycosylation
23918	23920	81.0437	YLGNATAIFFLPDEGK	gi|189163528, gi|189163530, gi|189163532, gi|189163534, gi|189163536, gi|189163538, gi|189163540, gi|189163542, gi|50363217, gi|50363219, gi|50363221	1460.53	N4H4F0S0G0	1073.15	3216.43	3	-1	6.2661	0.88406	N-linked glycosylation
27922	27925	92.3122	YLGNATAIFFLPDEGK	gi|189163528, gi|189163530, gi|189163532, gi|189163534, gi|189163536, gi|189163538, gi|189163540, gi|189163542, gi|50363217, gi|50363219, gi|50363221	2059.73	N4H5F1S1G0	1272.88	3815.62	3	-1	6.2421	-2.4339	N-linked glycosylation
30782	30784	100.369	YLGNATAIFFLPDEGK	gi|189163528, gi|189163530, gi|189163532, gi|189163534, gi|189163536, gi|189163538, gi|189163540, gi|189163542, gi|50363217, gi|50363219, gi|50363221	1913.68	N4H5F0S1G0	1224.2	3669.58	3	-1	6.2219	0.90614	N-linked glycosylation
35852	35853	114.721	YLGNATAIFFLPDEGK	gi|189163528, gi|189163530, gi|189163532, gi|189163534, gi|189163536, gi|189163538, gi|189163540, gi|189163542, gi|50363217, gi|50363219, gi|50363221	2204.77	N4H5F0S2G0	1321.23	3960.67	3	-1	6.164	0.97772	N-linked glycosylation
34955	34956	112.181	YLGNATAIFFLPDEGK	gi|189163528, gi|189163530, gi|189163532, gi|189163534, gi|189163536, gi|189163538, gi|189163540, gi|189163542, gi|50363217, gi|50363219, gi|50363221	2205.79	N4H5F2S1G0	991.423	3961.67	4	-1	6.1194	-5.3767	N-linked glycosylation
29872	29874	97.8027	YLGNATAIFFLPDEGK	gi|189163528, gi|189163530, gi|189163532, gi|189163534, gi|189163536, gi|189163538, gi|189163540, gi|189163542, gi|50363217, gi|50363219, gi|50363221	1913.68	N4H5F0S1G0	1224.53	3669.57	3	-2	5.3374	-1.372	N-linked glycosylation
27922	27929	92.3225	YLGNATAIFFLPDEGK	gi|189163528, gi|189163530, gi|189163532, gi|189163534, gi|189163536, gi|189163538, gi|189163540, gi|189163542, gi|50363217, gi|50363219, gi|50363221	2075.73	N4H6F0S1G0	1278.21	3831.63	3	-1	5.3009	-0.10507	N-linked glycosylation
35124	35125	112.661	YLGNATAIFFLPDEGK	gi|189163528, gi|189163530, gi|189163532, gi|189163534, gi|189163536, gi|189163538, gi|189163540, gi|189163542, gi|50363217, gi|50363219, gi|50363221	2204.77	N4H5F0S2G0	1321.56	3960.66	3	-2	5.2973	-1.2254	N-linked glycosylation
23528	23531	79.9507	YLGNATAIFFLPDEGK	gi|189163528, gi|189163530, gi|189163532, gi|189163534, gi|189163536, gi|189163538, gi|189163540, gi|189163542, gi|50363217, gi|50363219, gi|50363221	1622.58	N4H5F0S0G0	1690.24	3378.47	2	-1	5.2769	-2.462	N-linked glycosylation
30964	30970	100.893	YLGNATAIFFLPDEGK	gi|189163528, gi|189163530, gi|189163532, gi|189163534, gi|189163536, gi|189163538, gi|189163540, gi|189163542, gi|50363217, gi|50363219, gi|50363221	1913.68	N4H5F0S1G0	1224.53	3669.57	3	-2	5.2387	0.42436	N-linked glycosylation
24763	24765	83.4218	YLGNATAIFFLPDEGK	gi|189163528, gi|189163530, gi|189163532, gi|189163534, gi|189163536, gi|189163538, gi|189163540, gi|189163542, gi|50363217, gi|50363219, gi|50363221	1622.58	N4H5F0S0G0	1127.49	3378.46	3	-2	5.2222	-4.4705	N-linked glycosylation
28819	28829	94.8587	YLGNATAIFFLPDEGK	gi|189163528, gi|189163530, gi|189163532, gi|189163534, gi|189163536, gi|189163538, gi|189163540, gi|189163542, gi|50363217, gi|50363219, gi|50363221	1913.68	N4H5F0S1G0	918.399	3669.57	4	-1	5.2203	-0.52769	N-linked glycosylation
31341	31342	101.947	YLGNATAIFFLPDEGK	gi|189163528, gi|189163530, gi|189163532, gi|189163534, gi|189163536, gi|189163538, gi|189163540, gi|189163542, gi|50363217, gi|50363219, gi|50363221	1913.68	N4H5F0S1G0	1224.2	3669.57	3	-1	5.1832	-0.98999	N-linked glycosylation
36164	36168	115.612	ADTHDEILEGLNFNLTEIPEAQIHEGFQELLR	gi|189163528, gi|189163530, gi|189163532, gi|189163534, gi|189163536, gi|189163538, gi|189163540, gi|189163542, gi|50363217, gi|50363219, gi|50363221	2570.93	N5H6F2S1G0	1566.93	6262.7	4	-2	5.1745	-7.296	N-linked glycosylation
34773	34774	111.663	YLGNATAIFFLPDEGK	gi|189163528, gi|189163530, gi|189163532, gi|189163534, gi|189163536, gi|189163538, gi|189163540, gi|189163542, gi|50363217, gi|50363219, gi|50363221	2204.77	N4H5F0S2G0	991.424	3960.67	4	-2	5.1585	-0.21151	N-linked glycosylation
26167	26168	87.3655	YLGNATAIFFLPDEGK	gi|189163528, gi|189163530, gi|189163532, gi|189163534, gi|189163536, gi|189163538, gi|189163540, gi|189163542, gi|50363217, gi|50363219, gi|50363221	2204.77	N4H5F0S2G0	991.673	3960.66	4	-3	5.1282	-2.8461	N-linked glycosylation
36749	36751	117.262	ADTHDEILEGLNFNLTEIPEAQIHEGFQELLR	gi|189163528, gi|189163530, gi|189163532, gi|189163534, gi|189163536, gi|189163538, gi|189163540, gi|189163542, gi|50363217, gi|50363219, gi|50363221	2570.93	N5H6F2S1G0	1567.18	6262.69	4	-3	5.111	-8.8452	N-linked glycosylation
18900	18901	66.9442	VVLHPNYSQVDIGLIK	gi|186910296, gi|4826762, gi|767989864	1913.68	N4H5F0S1G0	1237.57	3708.68	3	-2	21.3142	-1.4412	N-linked glycosylation
18666	18667	66.2912	VVLHPNYSQVDIGLIK	gi|186910296, gi|4826762, gi|767989864	1913.68	N4H5F0S1G0	927.932	3708.7	4	0	20.2683	4.3144	N-linked glycosylation
18718	18719	66.4358	VVLHPNYSQVDIGLIK	gi|186910296, gi|4826762, gi|767989864	1913.68	N4H5F0S1G0	1237.57	3708.69	3	-2	19.3146	-0.74998	N-linked glycosylation
22540	22542	77.1682	VVLHPNYSQVDIGLIK	gi|186910296, gi|4826762, gi|767989864	2204.77	N4H5F0S2G0	1334.6	3999.78	3	-2	19.298	-0.74169	N-linked glycosylation
18848	18849	66.7982	VVLHPNYSQVDIGLIK	gi|186910296, gi|4826762, gi|767989864	1913.68	N4H5F0S1G0	928.429	3708.69	4	-2	19.2848	-0.32547	N-linked glycosylation
15871	15872	58.4447	VVLHPNYSQVDIGLIK	gi|186910296, gi|4826762, gi|767989864	1622.58	N4H5F0S0G0	1139.87	3417.6	3	0	18.3528	1.6679	N-linked glycosylation
15676	15679	57.9032	VVLHPNYSQVDIGLIK	gi|186910296, gi|4826762, gi|767989864	1622.58	N4H5F0S0G0	1139.87	3417.6	3	0	18.3313	3.2753	N-linked glycosylation
22345	22347	76.6225	VVLHPNYSQVDIGLIK	gi|186910296, gi|4826762, gi|767989864	2204.77	N4H5F0S2G0	1334.6	3999.78	3	-2	18.2942	-0.65013	N-linked glycosylation
19030	19032	67.3102	VVLHPNYSQVDIGLIK	gi|186910296, gi|4826762, gi|767989864	1913.68	N4H5F0S1G0	927.929	3708.69	4	0	18.2913	0.89125	N-linked glycosylation
15858	15859	58.4083	VVLHPNYSQVDIGLIK	gi|186910296, gi|4826762, gi|767989864	1622.58	N4H5F0S0G0	855.155	3417.6	4	0	17.3219	0.66415	N-linked glycosylation
22163	22164	76.111	VVLHPNYSQVDIGLIK	gi|186910296, gi|4826762, gi|767989864	2204.77	N4H5F0S2G0	1334.6	3999.78	3	-2	17.2985	-1.5657	N-linked glycosylation
22215	22216	76.2568	VVLHPNYSQVDIGLIK	gi|186910296, gi|4826762, gi|767989864	2204.77	N4H5F0S2G0	1001.2	3999.78	4	-2	16.2576	-0.53119	N-linked glycosylation
22397	22398	76.7648	VVLHPNYSQVDIGLIK	gi|186910296, gi|4826762, gi|767989864	2204.77	N4H5F0S2G0	1001.2	3999.78	4	-2	16.2569	-0.28703	N-linked glycosylation
22722	22723	77.6793	VVLHPNYSQVDIGLIK	gi|186910296, gi|4826762, gi|767989864	2204.77	N4H5F0S2G0	1334.6	3999.78	3	-2	15.2963	-1.0164	N-linked glycosylation
18575	18576	66.0373	VVLHPNYSQVDIGLIK	gi|186910296, gi|4826762, gi|767989864	2278.81	N5H6F0S1G0	1359.28	4073.82	3	-2	15.2934	0.096848	N-linked glycosylation
16053	16055	58.9592	VVLHPNYSQVDIGLIK	gi|186910296, gi|4826762, gi|767989864	1622.58	N4H5F0S0G0	1140.2	3417.6	3	-1	14.345	0.61486	N-linked glycosylation
18549	18550	65.965	VVLHPNYSQVDIGLIK	gi|186910296, gi|4826762, gi|767989864	2278.81	N5H6F0S1G0	1019.71	4073.83	4	-2	14.2818	1.4122	N-linked glycosylation
19225	19226	67.8543	VVLHPNYSQVDIGLIK	gi|186910296, gi|4826762, gi|767989864	1913.68	N4H5F0S1G0	927.929	3708.69	4	0	14.2811	1.2204	N-linked glycosylation
22761	22762	77.789	VVLHPNYSQVDIGLIK	gi|186910296, gi|4826762, gi|767989864	2204.77	N4H5F0S2G0	1000.7	3999.79	4	0	14.2603	1.2684	N-linked glycosylation
21955	21956	75.5282	VVLHPNYSQVDIGLIK	gi|186910296, gi|4826762, gi|767989864	2569.9	N5H6F0S2G0	1092.49	4364.92	4	-2	14.2431	-0.066766	N-linked glycosylation
22137	22138	76.0385	VVLHPNYSQVDIGLIK	gi|186910296, gi|4826762, gi|767989864	2569.9	N5H6F0S2G0	1092.48	4364.91	4	-2	13.2467	-1.6329	N-linked glycosylation
19446	19448	68.4792	VVLHPNYSQVDIGLIK	gi|186910296, gi|4826762, gi|767989864	1914.7	N4H5F2S0G0	1237.57	3709.68	3	-1	13.2085	-8.4047	N-linked glycosylation
15949	15951	58.6663	VVLHPNYSQVDIGLIK	gi|186910296, gi|4826762, gi|767989864	1257.45	N3H4F0S0G0	1018.83	3052.46	3	-2	12.371	-0.091431	N-linked glycosylation
21981	21982	75.6012	VVLHPNYSQVDIGLIK	gi|186910296, gi|4826762, gi|767989864	2569.9	N5H6F0S2G0	1456.31	4364.92	3	-2	12.2764	0.55136	N-linked glycosylation
19628	19629	68.9872	VVLHPNYSQVDIGLIK	gi|186910296, gi|4826762, gi|767989864	1914.7	N4H5F2S0G0	1237.57	3709.68	3	-1	12.2221	-8.7996	N-linked glycosylation
19407	19409	68.3695	VVLHPNYSQVDIGLIK	gi|186910296, gi|4826762, gi|767989864	1913.68	N4H5F0S1G0	928.43	3708.69	4	-2	12.203	0.66197	N-linked glycosylation
20720	20721	72.0625	VVLHPNYSQVDIGLIK	gi|186910296, gi|4826762, gi|767989864	1913.68	N4H5F0S1G0	1236.9	3708.69	3	0	11.35	0.99337	N-linked glycosylation
15663	15664	57.8617	VVLHPNYSQVDIGLIK	gi|186910296, gi|4826762, gi|767989864	1987.71	N5H6F0S0G0	1261.58	3782.72	3	0	11.3162	-0.461	N-linked glycosylation
19992	19993	70.011	VVLHPNYSQVDIGLIK	gi|186910296, gi|4826762, gi|767989864	1913.68	N4H5F0S1G0	1236.9	3708.69	3	0	11.2947	0.10467	N-linked glycosylation
16040	16042	58.9223	VVLHPNYSQVDIGLIK	gi|186910296, gi|4826762, gi|767989864	1622.58	N4H5F0S0G0	855.154	3417.59	4	0	11.2926	-0.83601	N-linked glycosylation
19810	19811	69.4977	VVLHPNYSQVDIGLIK	gi|186910296, gi|4826762, gi|767989864	1913.68	N4H5F0S1G0	1237.57	3708.68	3	-2	11.2336	-2.6261	N-linked glycosylation
26258	26259	87.6213	VVLHPNYSQVDIGLIK	gi|186910296, gi|4826762, gi|767989864	2861	N5H6F0S3G0	1165.26	4656.01	4	-2	11.2063	0.422	N-linked glycosylation
22943	22944	78.302	VVLHPNYSQVDIGLIK	gi|186910296, gi|4826762, gi|767989864	2205.79	N4H5F2S1G0	1001.2	4000.78	4	-1	11.182	-6.256	N-linked glycosylation
18380	18383	65.497	VVLHPNYSQVDIGLIK	gi|186910296, gi|4826762, gi|767989864	2278.81	N5H6F0S1G0	1359.28	4073.82	3	-2	10.3254	-0.17283	N-linked glycosylation
18601	18602	66.1102	VVLHPNYSQVDIGLIK	gi|186910296, gi|4826762, gi|767989864	2059.73	N4H5F1S1G0	1285.59	3854.74	3	0	10.3182	-1.461	N-linked glycosylation
15676	15677	57.898	VVLHPNYSQVDIGLIK	gi|186910296, gi|4826762, gi|767989864	1987.71	N5H6F0S0G0	946.939	3782.72	4	-2	10.3178	-0.23731	N-linked glycosylation
15208	15209	56.5837	VVLHPNYSQVDIGLIK	gi|186910296, gi|4826762, gi|767989864	1913.68	N4H5F0S1G0	928.179	3708.69	4	-1	10.2839	-0.27666	N-linked glycosylation
17938	17939	64.2512	VVLHPNYSQVDIGLIK	gi|186910296, gi|4826762, gi|767989864	2204.77	N4H5F0S2G0	1001.2	3999.79	4	-2	10.278	0.32335	N-linked glycosylation
23086	23087	78.7013	VVLHPNYSQVDIGLIK	gi|186910296, gi|4826762, gi|767989864	2205.79	N4H5F2S1G0	1334.93	4000.77	3	-2	10.2056	-8.0068	N-linked glycosylation
19589	19590	68.8777	VVLHPNYSQVDIGLIK	gi|186910296, gi|4826762, gi|767989864	1914.7	N4H5F2S0G0	928.427	3709.68	4	-1	10.1615	-8.0132	N-linked glycosylation
16417	16418	59.9815	VVLHPNYSQVDIGLIK	gi|186910296, gi|4826762, gi|767989864	1622.58	N4H5F0S0G0	1139.87	3417.6	3	0	9.3368	1.5608	N-linked glycosylation
16235	16236	59.4687	VVLHPNYSQVDIGLIK	gi|186910296, gi|4826762, gi|767989864	1622.58	N4H5F0S0G0	1139.87	3417.6	3	0	9.2731	0.91785	N-linked glycosylation
18731	18733	66.4745	VVLHPNYSQVDIGLIK	gi|186910296, gi|4826762, gi|767989864	2278.81	N5H6F0S1G0	1019.21	4073.84	4	0	9.2718	3.5387	N-linked glycosylation
22267	22272	76.412	VVLHPNYSQVDIGLIK	gi|186910296, gi|4826762, gi|767989864	2204.77	N4H5F0S2G0	800.964	3999.79	5	-1	9.2609	0.27392	N-linked glycosylation
18913	18924	67.0058	VVLHPNYSQVDIGLIK	gi|186910296, gi|4826762, gi|767989864	1548.54	N3H4F0S1G0	836.898	3343.56	4	-1	9.2582	2.0656	N-linked glycosylation
19771	19772	69.3882	VVLHPNYSQVDIGLIK	gi|186910296, gi|4826762, gi|767989864	1913.68	N4H5F0S1G0	928.427	3708.68	4	-2	9.1774	-2.5637	N-linked glycosylation
19823	19829	69.5473	VVLHPNYSQVDIGLIK	gi|186910296, gi|4826762, gi|767989864	1913.68	N4H5F0S1G0	1236.9	3708.69	3	0	9.1547	0.20342	N-linked glycosylation
15962	15964	58.7033	VVLHPNYSQVDIGLIK	gi|186910296, gi|4826762, gi|767989864	1460.53	N4H4F0S0G0	1085.86	3255.55	3	0	8.3104	4.3584	N-linked glycosylation
20174	20175	70.525	VVLHPNYSQVDIGLIK	gi|186910296, gi|4826762, gi|767989864	1913.68	N4H5F0S1G0	1237.57	3708.68	3	-2	8.2973	-2.1324	N-linked glycosylation
19953	19954	69.9007	VVLHPNYSQVDIGLIK	gi|186910296, gi|4826762, gi|767989864	1913.68	N4H5F0S1G0	927.931	3708.7	4	0	8.2541	2.8661	N-linked glycosylation
16599	16603	60.5005	VVLHPNYSQVDIGLIK	gi|186910296, gi|4826762, gi|767989864	1622.58	N4H5F0S0G0	1139.87	3417.61	3	0	8.1436	3.3824	N-linked glycosylation
18809	18813	66.6973	VVLHPNYSQVDIGLIK	gi|186910296, gi|4826762, gi|767989864	1751.62	N4H4F0S1G0	1183.89	3546.65	3	-3	7.3333	3.1758	N-linked glycosylation
19004	19015	67.2613	VVLHPNYSQVDIGLIK	gi|186910296, gi|4826762, gi|767989864	1751.62	N4H4F0S1G0	887.665	3546.63	4	-1	7.3052	-1.3034	N-linked glycosylation
18757	18760	66.5495	VVLHPNYSQVDIGLIK	gi|186910296, gi|4826762, gi|767989864	2278.81	N5H6F0S1G0	1358.62	4073.84	3	0	7.3018	4.9201	N-linked glycosylation
17509	17511	63.0505	VVLHPNYSQVDIGLIK	gi|186910296, gi|4826762, gi|767989864	1622.58	N4H5F0S0G0	1139.87	3417.59	3	0	7.2888	0.27492	N-linked glycosylation
18796	18799	66.6585	VVLHPNYSQVDIGLIK	gi|186910296, gi|4826762, gi|767989864	2059.73	N4H5F1S1G0	964.693	3854.74	4	-1	7.2869	-0.59288	N-linked glycosylation
20356	20357	71.0382	VVLHPNYSQVDIGLIK	gi|186910296, gi|4826762, gi|767989864	1913.68	N4H5F0S1G0	1236.9	3708.69	3	0	7.2863	0.30216	N-linked glycosylation
16222	16224	59.4347	VVLHPNYSQVDIGLIK	gi|186910296, gi|4826762, gi|767989864	1622.58	N4H5F0S0G0	855.154	3417.59	4	0	7.2858	-0.05021	N-linked glycosylation
21084	21085	73.0858	VVLHPNYSQVDIGLIK	gi|186910296, gi|4826762, gi|767989864	1913.68	N4H5F0S1G0	1236.9	3708.69	3	0	7.2777	-0.092815	N-linked glycosylation
20317	20318	70.9288	VVLHPNYSQVDIGLIK	gi|186910296, gi|4826762, gi|767989864	1913.68	N4H5F0S1G0	927.93	3708.7	4	0	7.2693	2.4712	N-linked glycosylation
22163	22165	76.1137	VVLHPNYSQVDIGLIK	gi|186910296, gi|4826762, gi|767989864	2569.9	N5H6F0S2G0	1456.31	4364.91	3	-2	7.2686	-1.2105	N-linked glycosylation
15013	15020	56.0515	VVLHPNYSQVDIGLIK	gi|186910296, gi|4826762, gi|767989864	1913.68	N4H5F0S1G0	928.182	3708.7	4	-1	7.2612	3.1465	N-linked glycosylation
21825	21828	75.1702	VVLHPNYSQVDIGLIK	gi|186910296, gi|4826762, gi|767989864	1913.68	N4H5F0S1G0	928.179	3708.69	4	-1	7.2104	0.57912	N-linked glycosylation
18809	18821	66.718	VVLHPNYSQVDIGLIK	gi|186910296, gi|4826762, gi|767989864	1751.62	N4H4F0S1G0	887.67	3546.65	4	-1	6.2996	4.6166	N-linked glycosylation
20902	20903	72.5745	VVLHPNYSQVDIGLIK	gi|186910296, gi|4826762, gi|767989864	1913.68	N4H5F0S1G0	1236.9	3708.69	3	0	6.2932	0.20342	N-linked glycosylation
21448	21449	74.1062	VVLHPNYSQVDIGLIK	gi|186910296, gi|4826762, gi|767989864	1913.68	N4H5F0S1G0	1236.9	3708.69	3	0	6.2906	0.59839	N-linked glycosylation
21266	21267	73.5957	VVLHPNYSQVDIGLIK	gi|186910296, gi|4826762, gi|767989864	1913.68	N4H5F0S1G0	1236.9	3708.7	3	0	6.29	2.5733	N-linked glycosylation
20499	20501	71.4438	VVLHPNYSQVDIGLIK	gi|186910296, gi|4826762, gi|767989864	1913.68	N4H5F0S1G0	927.928	3708.69	4	0	6.2827	0.49627	N-linked glycosylation
21071	21073	73.052	VVLHPNYSQVDIGLIK	gi|186910296, gi|4826762, gi|767989864	1913.68	N4H5F0S1G0	928.43	3708.69	4	-2	6.2771	-0.19381	N-linked glycosylation
21630	21632	74.62	VVLHPNYSQVDIGLIK	gi|186910296, gi|4826762, gi|767989864	1913.68	N4H5F0S1G0	1236.9	3708.68	3	0	6.2745	-2.4627	N-linked glycosylation
22007	22008	75.6738	VVLHPNYSQVDIGLIK	gi|186910296, gi|4826762, gi|767989864	1913.68	N4H5F0S1G0	1236.9	3708.69	3	0	6.2613	-0.092815	N-linked glycosylation
20135	20136	70.4147	VVLHPNYSQVDIGLIK	gi|186910296, gi|4826762, gi|767989864	1913.68	N4H5F0S1G0	927.928	3708.69	4	0	6.2591	0.29878	N-linked glycosylation
22202	22207	76.231	VVLHPNYSQVDIGLIK	gi|186910296, gi|4826762, gi|767989864	2350.79	N2H12F0S0G0	1382.95	4145.84	3	-1	6.2543	8.4605	N-linked glycosylation
20681	20685	71.9608	VVLHPNYSQVDIGLIK	gi|186910296, gi|4826762, gi|767989864	1913.68	N4H5F0S1G0	927.928	3708.69	4	0	6.2466	-0.22785	N-linked glycosylation
22072	22081	75.8777	VVLHPNYSQVDIGLIK	gi|186910296, gi|4826762, gi|767989864	2204.77	N4H5F0S2G0	800.762	3999.78	5	0	6.2439	-1.4967	N-linked glycosylation
22319	22320	76.5473	VVLHPNYSQVDIGLIK	gi|186910296, gi|4826762, gi|767989864	2569.9	N5H6F0S2G0	1092.74	4364.92	4	-3	6.2333	0.84262	N-linked glycosylation
26076	26077	87.1097	VVLHPNYSQVDIGLIK	gi|186910296, gi|4826762, gi|767989864	2861	N5H6F0S3G0	1165.51	4656.01	4	-3	6.2167	-0.50828	N-linked glycosylation
25556	25558	85.6505	VVLHPNYSQVDIGLIK	gi|186910296, gi|4826762, gi|767989864	2204.77	N4H5F0S2G0	1001.2	3999.78	4	-2	6.1966	-0.89742	N-linked glycosylation
22020	22023	75.716	VVLHPNYSQVDIGLIK	gi|186910296, gi|4826762, gi|767989864	2204.77	N4H5F0S2G0	1001.2	3999.78	4	-2	6.1914	-0.40911	N-linked glycosylation
16781	16782	61.0032	VVLHPNYSQVDIGLIK	gi|186910296, gi|4826762, gi|767989864	1622.58	N4H5F0S0G0	1140.54	3417.58	3	-2	6.1763	-2.6885	N-linked glycosylation
26297	26299	87.7333	VVLHPNYSQVDIGLIK	gi|186910296, gi|4826762, gi|767989864	2861	N5H6F0S3G0	1553.34	4656	3	-2	5.3198	-2.0398	N-linked glycosylation
21643	21644	74.6538	VVLHPNYSQVDIGLIK	gi|186910296, gi|4826762, gi|767989864	1913.68	N4H5F0S1G0	928.429	3708.68	4	-2	5.3085	-1.1812	N-linked glycosylation
18458	18460	65.713	VVLHPNYSQVDIGLIK	gi|186910296, gi|4826762, gi|767989864	1622.58	N4H5F0S0G0	1140.21	3417.6	3	-1	5.293	1.2578	N-linked glycosylation
16404	16406	59.9478	VVLHPNYSQVDIGLIK	gi|186910296, gi|4826762, gi|767989864	1622.58	N4H5F0S0G0	855.408	3417.61	4	-1	5.2858	3.5401	N-linked glycosylation
15481	15485	57.3583	VVLHPNYSQVDIGLIK	gi|186910296, gi|4826762, gi|767989864	1987.71	N5H6F0S0G0	946.687	3782.72	4	-1	5.2793	-1.2221	N-linked glycosylation
17145	17146	62.027	VVLHPNYSQVDIGLIK	gi|186910296, gi|4826762, gi|767989864	1622.58	N4H5F0S0G0	1139.87	3417.6	3	0	5.2759	0.91785	N-linked glycosylation
21266	21268	73.5982	VVLHPNYSQVDIGLIK	gi|186910296, gi|4826762, gi|767989864	1913.68	N4H5F0S1G0	928.423	3708.66	4	-2	5.2698	-7.6984	N-linked glycosylation
22020	22027	75.7263	VVLHPNYSQVDIGLIK	gi|186910296, gi|4826762, gi|767989864	1913.68	N4H5F0S1G0	928.177	3708.68	4	-1	5.2696	-2.1857	N-linked glycosylation
20876	20879	72.5065	VVLHPNYSQVDIGLIK	gi|186910296, gi|4826762, gi|767989864	1913.68	N4H5F0S1G0	927.929	3708.69	4	0	5.2661	1.2204	N-linked glycosylation
16768	16770	60.9695	VVLHPNYSQVDIGLIK	gi|186910296, gi|4826762, gi|767989864	1622.58	N4H5F0S0G0	855.904	3417.58	4	-3	5.2648	-3.2809	N-linked glycosylation
18510	18513	65.8613	VVLHPNYSQVDIGLIK	gi|186910296, gi|4826762, gi|767989864	2204.77	N4H5F0S2G0	1001.2	3999.78	4	-2	5.2582	-0.65326	N-linked glycosylation
18783	18786	66.6222	VVLHPNYSQVDIGLIK	gi|186910296, gi|4826762, gi|767989864	2059.73	N4H5F1S1G0	1285.93	3854.76	3	-1	5.2454	3.5905	N-linked glycosylation
17886	17890	64.1135	VVLHPNYSQVDIGLIK	gi|186910296, gi|4826762, gi|767989864	1622.58	N4H5F0S0G0	1139.87	3417.6	3	0	5.2435	1.5608	N-linked glycosylation
20538	20539	71.5512	VVLHPNYSQVDIGLIK	gi|186910296, gi|4826762, gi|767989864	1913.68	N4H5F0S1G0	1236.9	3708.68	3	0	5.2404	-1.3765	N-linked glycosylation
18380	18382	65.4943	VVLHPNYSQVDIGLIK	gi|186910296, gi|4826762, gi|767989864	2643.94	N6H7F0S1G0	1111	4438.95	4	-2	5.2401	0.22404	N-linked glycosylation
22501	22502	77.0562	VVLHPNYSQVDIGLIK	gi|186910296, gi|4826762, gi|767989864	2569.9	N5H6F0S2G0	1092.49	4364.92	4	-2	5.2378	-0.066766	N-linked glycosylation
21825	21826	75.165	VVLHPNYSQVDIGLIK	gi|186910296, gi|4826762, gi|767989864	2935.04	N6H7F0S2G0	1183.77	4730.05	4	-2	5.2046	0.067879	N-linked glycosylation
21942	21945	75.4972	VVLHPNYSQVDIGLIK	gi|186910296, gi|4826762, gi|767989864	2715.96	N5H6F1S2G0	1129	4510.98	4	-2	5.2026	1.4963	N-linked glycosylation
26622	26623	88.6492	VVLHPNYSQVDIGLIK	gi|186910296, gi|4826762, gi|767989864	2861	N5H6F0S3G0	1165.26	4656.02	4	-2	5.1985	1.4707	N-linked glycosylation
23632	23634	80.2398	VVLHPNYSQVDIGLIK	gi|186910296, gi|4826762, gi|767989864	2204.77	N4H5F0S2G0	1334.92	3999.75	3	-3	5.1171	-9.4239	N-linked glycosylation
16742	16743	60.8943	MVSHHNLTTGATLINEQWLLTTAK	gi|186910296, gi|45580723, gi|4826762, gi|767989864, gi|767989866, gi|767989868	1622.58	N4H5F0S0G0	1080.75	4317.97	4	-2	25.3164	0.55814	N-linked glycosylation
19706	19707	69.2058	MVSHHNLTTGATLINEQWLLTTAK	gi|186910296, gi|45580723, gi|4826762, gi|767989864, gi|767989866, gi|767989868	1913.68	N4H5F0S1G0	1149.53	4593.07	4	-2	23.3401	0.97183	N-linked glycosylation
19108	19109	67.5262	MVSHHNLTTGATLINEQWLLTTAK	gi|186910296, gi|45580723, gi|4826762, gi|767989864, gi|767989866, gi|767989868	1913.68	N4H5F0S1G0	1153.53	4609.07	4	-2	23.2975	1.2243	N-linked glycosylation
19290	19291	68.0367	MVSHHNLTTGATLINEQWLLTTAK	gi|186910296, gi|45580723, gi|4826762, gi|767989864, gi|767989866, gi|767989868	1913.68	N4H5F0S1G0	1153.52	4609.07	4	-2	22.298	0.58865	N-linked glycosylation
22085	22086	75.893	MVSHHNLTTGATLINEQWLLTTAK	gi|186910296, gi|45580723, gi|4826762, gi|767989864, gi|767989866, gi|767989868	2204.77	N4H5F0S2G0	1226.3	4900.16	4	-2	22.2774	-0.081978	N-linked glycosylation
21890	21893	75.3522	MVSHHNLTTGATLINEQWLLTTAK	gi|186910296, gi|45580723, gi|4826762, gi|767989864, gi|767989866, gi|767989868	2204.77	N4H5F0S2G0	1226.55	4900.15	4	-3	21.2744	-1.0656	N-linked glycosylation
19524	19525	68.695	MVSHHNLTTGATLINEQWLLTTAK	gi|186910296, gi|45580723, gi|4826762, gi|767989864, gi|767989866, gi|767989868	1913.68	N4H5F0S1G0	1149.53	4593.07	4	-2	20.3264	0.75922	N-linked glycosylation
22488	22489	77.0198	MVSHHNLTTGATLINEQWLLTTAK	gi|186910296, gi|45580723, gi|4826762, gi|767989864, gi|767989866, gi|767989868	2204.77	N4H5F0S2G0	1222.3	4884.16	4	-2	20.2927	-1.5233	N-linked glycosylation
4143	4148	25.1322	NLFLNHSENATAK	gi|186910296, gi|45580723, gi|4826762, gi|767989864, gi|767989866, gi|767989868	1622.58	N4H5F0S0G0	1027.78	3081.32	3	0	15.4447	1.4048	N-linked glycosylation
17340	17341	62.5737	MVSHHNLTTGATLINEQWLLTTAK	gi|186910296, gi|45580723, gi|4826762, gi|767989864, gi|767989866, gi|767989868	1622.58	N4H5F0S0G0	1076.25	4301.98	4	0	14.382	0.48377	N-linked glycosylation
20018	20019	70.084	MVSHHNLTTGATLINEQWLLTTAK	gi|186910296, gi|45580723, gi|4826762, gi|767989864, gi|767989866, gi|767989868	1914.7	N4H5F2S0G0	1153.77	4610.05	4	-2	14.1605	-7.3318	N-linked glycosylation
22046	22048	75.7865	MVSHHNLTTGATLINEQWLLTTAK	gi|186910296, gi|45580723, gi|4826762, gi|767989864, gi|767989866, gi|767989868	2204.77	N4H5F0S2G0	980.839	4900.17	5	0	13.2873	1.1477	N-linked glycosylation
16924	16925	61.405	MVSHHNLTTGATLINEQWLLTTAK	gi|186910296, gi|45580723, gi|4826762, gi|767989864, gi|767989866, gi|767989868	1622.58	N4H5F0S0G0	1080.75	4317.97	4	-2	12.3347	0.10581	N-linked glycosylation
16911	16912	61.3685	MVSHHNLTTGATLINEQWLLTTAK	gi|186910296, gi|45580723, gi|4826762, gi|767989864, gi|767989866, gi|767989868	1954.7	N5H4F0S1G0	931.226	4650.09	5	-2	12.1923	0.54382	N-linked glycosylation
22826	22827	77.9723	MVSHHNLTTGATLINEQWLLTTAK	gi|186910296, gi|45580723, gi|4826762, gi|767989864, gi|767989866, gi|767989868	2205.79	N4H5F2S1G0	1226.54	4901.15	4	-2	12.1451	-6.436	N-linked glycosylation
17288	17289	62.4287	MVSHHNLTTGATLINEQWLLTTAK	gi|186910296, gi|45580723, gi|4826762, gi|767989864, gi|767989866, gi|767989868	1622.58	N4H5F0S0G0	1081	4317.96	4	-3	11.2892	-2.8197	N-linked glycosylation
19212	19214	67.82	MVSHHNLTTGATLINEQWLLTTAK	gi|186910296, gi|45580723, gi|4826762, gi|767989864, gi|767989866, gi|767989868	1913.68	N4H5F0S1G0	923.021	4609.07	5	-2	11.1836	0.94348	N-linked glycosylation
19199	19202	67.7867	MVSHHNLTTGATLINEQWLLTTAK	gi|186910296, gi|45580723, gi|4826762, gi|767989864, gi|767989866, gi|767989868	2245.8	N5H4F0S2G0	989.445	4941.19	5	-2	11.1271	0.054334	N-linked glycosylation
17600	17603	63.3082	MVSHHNLTTGATLINEQWLLTTAK	gi|186910296, gi|45580723, gi|4826762, gi|767989864, gi|767989866, gi|767989868	1622.58	N4H5F0S0G0	1080.75	4317.96	4	-2	10.1379	-2.9474	N-linked glycosylation
23021	23022	78.5197	MVSHHNLTTGATLINEQWLLTTAK	gi|186910296, gi|45580723, gi|4826762, gi|767989864, gi|767989866, gi|767989868	1954.7	N5H4F0S1G0	1164.28	4650.07	4	-4	10.111	-4.5847	N-linked glycosylation
22267	22269	76.4042	MVSHHNLTTGATLINEQWLLTTAK	gi|186910296, gi|45580723, gi|4826762, gi|767989864, gi|767989866, gi|767989868	2204.77	N4H5F0S2G0	1226.3	4900.16	4	-2	9.2727	-0.58021	N-linked glycosylation
19017	19021	67.2795	MVSHHNLTTGATLINEQWLLTTAK	gi|186910296, gi|45580723, gi|4826762, gi|767989864, gi|767989866, gi|767989868	1913.68	N4H5F0S1G0	923.023	4609.07	5	-2	9.2629	2.0691	N-linked glycosylation
15026	15029	56.0773	MVSHHNLTTGATLINEQWLLTTAK	gi|186910296, gi|45580723, gi|4826762, gi|767989864, gi|767989866, gi|767989868	1663.61	N5H4F0S0G0	873.007	4359	5	-2	9.2357	0.25856	N-linked glycosylation
21851	21854	75.2428	MVSHHNLTTGATLINEQWLLTTAK	gi|186910296, gi|45580723, gi|4826762, gi|767989864, gi|767989866, gi|767989868	2204.77	N4H5F0S2G0	981.24	4900.16	5	-2	8.2554	0.17704	N-linked glycosylation
21799	21800	75.0922	MVSHHNLTTGATLINEQWLLTTAK	gi|186910296, gi|45580723, gi|4826762, gi|767989864, gi|767989866, gi|767989868	2569.9	N5H6F0S2G0	1317.83	5265.29	4	-3	8.2366	-0.59713	N-linked glycosylation
18861	18863	66.8372	MVSHHNLTTGATLINEQWLLTTAK	gi|186910296, gi|45580723, gi|4826762, gi|767989864, gi|767989866, gi|767989868	2278.81	N5H6F0S1G0	1244.56	4974.2	4	-1	8.1656	1.2449	N-linked glycosylation
22358	22363	76.6665	MVSHHNLTTGATLINEQWLLTTAK	gi|186910296, gi|45580723, gi|4826762, gi|767989864, gi|767989866, gi|767989868	2204.77	N4H5F0S2G0	978.042	4884.17	5	-2	8.115	1.0609	N-linked glycosylation
6641	6644	32.5458	NLFLNHSENATAK	gi|186910296, gi|45580723, gi|4826762, gi|767989864, gi|767989866, gi|767989868	1913.68	N4H5F0S1G0	1124.81	3372.42	3	0	7.3853	3.1832	N-linked glycosylation
19056	19057	67.3808	MVSHHNLTTGATLINEQWLLTTAK	gi|186910296, gi|45580723, gi|4826762, gi|767989864, gi|767989866, gi|767989868	2278.81	N5H6F0S1G0	1244.81	4974.19	4	-2	7.2409	-1.1965	N-linked glycosylation
19537	19544	68.7472	MVSHHNLTTGATLINEQWLLTTAK	gi|186910296, gi|45580723, gi|4826762, gi|767989864, gi|767989866, gi|767989868	1913.68	N4H5F0S1G0	920.026	4593.09	5	-3	7.228	4.1588	N-linked glycosylation
25166	25167	84.55	MVSHHNLTTGATLINEQWLLTTAK	gi|186910296, gi|45580723, gi|4826762, gi|767989864, gi|767989866, gi|767989868	2861	N5H6F0S3G0	1390.6	5556.38	4	-3	7.2214	-0.59917	N-linked glycosylation
19199	19200	67.7813	MVSHHNLTTGATLINEQWLLTTAK	gi|186910296, gi|45580723, gi|4826762, gi|767989864, gi|767989866, gi|767989868	1913.68	N4H5F0S1G0	1537.69	4609.06	3	-2	6.2751	-0.81232	N-linked glycosylation
18939	18942	67.0582	MVSHHNLTTGATLINEQWLLTTAK	gi|186910296, gi|45580723, gi|4826762, gi|767989864, gi|767989866, gi|767989868	2059.73	N4H5F1S1G0	1190.04	4755.14	4	-2	6.2145	3.1809	N-linked glycosylation
17093	17094	61.8812	MVSHHNLTTGATLINEQWLLTTAK	gi|186910296, gi|45580723, gi|4826762, gi|767989864, gi|767989866, gi|767989868	1954.7	N5H4F0S1G0	931.226	4650.09	5	-2	6.1158	0.4782	N-linked glycosylation
6485	6491	32.1172	NLFLNHSENATAK	gi|186910296, gi|45580723, gi|4826762, gi|767989864, gi|767989866, gi|767989868	1913.68	N4H5F0S1G0	844.107	3372.4	4	-1	5.3121	-2.4484	N-linked glycosylation
10047	10048	42.1012	NLFLNHSENATAK	gi|186910296, gi|45580723, gi|4826762, gi|767989864, gi|767989866, gi|767989868	2204.77	N4H5F0S2G0	1222.17	3663.5	3	-1	5.3064	-1.7012	N-linked glycosylation
21981	21984	75.6063	MVSHHNLTTGATLINEQWLLTTAK	gi|186910296, gi|45580723, gi|4826762, gi|767989864, gi|767989866, gi|767989868	2569.9	N5H6F0S2G0	1317.59	5265.31	4	-2	5.2267	3.564	N-linked glycosylation
20746	20747	72.1353	MVSHHNLTTGATLINEQWLLTTAK	gi|186910296, gi|45580723, gi|4826762, gi|767989864, gi|767989866, gi|767989868	1913.68	N4H5F0S1G0	1153.77	4609.05	4	-3	5.2031	-2.1521	N-linked glycosylation
22254	22256	76.3678	MVSHHNLTTGATLINEQWLLTTAK	gi|186910296, gi|45580723, gi|4826762, gi|767989864, gi|767989866, gi|767989868	2205.79	N4H5F2S1G0	981.242	4901.17	5	-1	5.1853	-1.3705	N-linked glycosylation
19329	19338	68.1675	MVSHHNLTTGATLINEQWLLTTAK	gi|186910296, gi|45580723, gi|4826762, gi|767989864, gi|767989866, gi|767989868	1548.54	N3H4F0S1G0	1061.99	4243.94	4	-1	5.1822	2.321	N-linked glycosylation
16716	16721	60.8313	MVSHHNLTTGATLINEQWLLTTAK	gi|186910296, gi|45580723, gi|4826762, gi|767989864, gi|767989866, gi|767989868	1954.7	N5H4F0S1G0	930.825	4650.09	5	0	5.1165	0.71355	N-linked glycosylation
17795	17797	63.8528	MVSHHNLTTGATLINEQWLLTTAK	gi|186910296, gi|45580723, gi|4826762, gi|767989864, gi|767989866, gi|767989868	1622.58	N4H5F0S0G0	1081	4317.95	4	-3	5.105	-3.9505	N-linked glycosylation
11633	11634	46.547	FSDGLESNSSTQFEVK	gi|178557739, gi|338858017, gi|356582273, gi|67190748, gi|768052592	1864.63	N2H9F0S0G0	1214.49	3639.45	3	-2	22.4633	-0.38484	N-linked glycosylation
11568	11572	46.3737	FSDGLESNSSTQFEVK	gi|178557739, gi|338858017, gi|356582273, gi|67190748, gi|768052592	1702.58	N2H8F0S0G0	1159.8	3477.39	3	0	10.3374	-0.10427	N-linked glycosylation
11737	11739	46.8413	FSDGLESNSSTQFEVK	gi|178557739, gi|338858017, gi|356582273, gi|67190748, gi|768052592	1702.58	N2H8F0S0G0	1160.14	3477.39	3	-1	9.3946	-1.2446	N-linked glycosylation
11815	11821	47.072	FSDGLESNSSTQFEVK	gi|178557739, gi|338858017, gi|356582273, gi|67190748, gi|768052592	1864.63	N2H9F0S0G0	1213.82	3639.45	3	0	9.3602	0.88856	N-linked glycosylation
11438	11447	46.0233	FSDGLESNSSTQFEVK	gi|178557739, gi|338858017, gi|356582273, gi|67190748, gi|768052592	1864.63	N2H9F0S0G0	1214.49	3639.45	3	-2	9.3335	1.6276	N-linked glycosylation
19875	19877	69.6837	NTTCQDLQIEVTVK	gi|178557739, gi|338858017, gi|356582273, gi|67190748, gi|768052592	2204.77	N4H5F0S2G0	964.154	3853.59	4	0	9.1978	-0.077081	N-linked glycosylation
19680	19684	69.141	NTTCQDLQIEVTVK	gi|178557739, gi|338858017, gi|356582273, gi|67190748, gi|768052592	2204.77	N4H5F0S2G0	964.905	3853.59	4	-3	8.2005	-1.9286	N-linked glycosylation
11997	12000	47.5748	FSDGLESNSSTQFEVK	gi|178557739, gi|338858017, gi|356582273, gi|67190748, gi|768052592	1864.63	N2H9F0S0G0	1214.15	3639.44	3	-1	7.3903	-0.80468	N-linked glycosylation
15260	15265	56.7402	NTTCQDLQIEVTVK	gi|178557739, gi|338858017, gi|356582273, gi|67190748, gi|768052592	1913.68	N4H5F0S1G0	891.882	3562.5	4	-2	5.3168	0.1411	N-linked glycosylation
11399	11400	45.8928	GLNVTLSSTGR	gi|178557739, gi|338858017, gi|356582273, gi|67190748, gi|768052592	1913.68	N4H5F0S1G0	1006.77	3018.28	3	0	5.264	1.2085	N-linked glycosylation
9735	9736	41.2217	VLNFTTK	gi|169636415, gi|189242612, gi|530378932, gi|578809986, gi|767934622, gi|767934625, gi|767934627, gi|767934629, gi|767934631, gi|767934633, gi|767934635, gi|767934637	1913.68	N4H5F0S1G0	912.723	2736.15	3	0	9.3454	1.4216	N-linked glycosylation
14935	14936	55.8168	VLNFTTK	gi|169636415, gi|189242612, gi|530378932, gi|578809986, gi|767934622, gi|767934625, gi|767934627, gi|767934629, gi|767934631, gi|767934633, gi|767934635, gi|767934637	2204.77	N4H5F0S2G0	1010.09	3027.25	3	-1	7.3872	0.45824	N-linked glycosylation
4130	4136	25.099	HEEGHMLNCTCFGQGR	gi|16933542, gi|47132547, gi|47132549, gi|47132553, gi|47132555, gi|47132557, gi|530370025, gi|530370027, gi|530370029, gi|530370031, gi|530370033, gi|530370035, gi|530370037, gi|530370039, gi|530370041, gi|530370043, gi|530370045, gi|530370047, gi|530370049, gi|530370051, gi|530370053, gi|530370055, gi|530370057, gi|530370059, gi|530370061, gi|530370063, gi|530370065	1913.68	N4H5F0S1G0	966.623	3862.47	4	-1	17.2441	0.9287	N-linked glycosylation
6069	6072	30.9537	HEEGHMLNCTCFGQGR	gi|16933542, gi|47132547, gi|47132549, gi|47132553, gi|47132555, gi|47132557, gi|530370025, gi|530370027, gi|530370029, gi|530370031, gi|530370033, gi|530370035, gi|530370037, gi|530370039, gi|530370041, gi|530370043, gi|530370045, gi|530370047, gi|530370049, gi|530370051, gi|530370053, gi|530370055, gi|530370057, gi|530370059, gi|530370061, gi|530370063, gi|530370065	2204.77	N4H5F0S2G0	1039.65	4153.56	4	-2	5.2731	0.24645	N-linked glycosylation
7889	7899	36.062	HTSVQTTSSGSGPFTDVR	gi|16933542, gi|47132547, gi|47132549, gi|47132553, gi|47132555, gi|47132557, gi|530370025, gi|530370027, gi|530370029, gi|530370031, gi|530370033, gi|530370035, gi|530370037, gi|530370039, gi|530370041, gi|530370043, gi|530370045, gi|530370047, gi|530370049, gi|530370051, gi|530370053, gi|530370055, gi|530370057, gi|530370059, gi|530370061, gi|530370063, gi|530370065	656.228	N1H1F0S1G0	840.712	2520.12	3	0	11.4315	3.6374	O-linked glycosylation
4834	4842	27.5105	HTSVQTTSSGSGPFTDVR	gi|16933542, gi|47132547, gi|47132549, gi|47132553, gi|47132555, gi|47132557, gi|530370025, gi|530370027, gi|530370029, gi|530370031, gi|530370033, gi|530370035, gi|530370037, gi|530370039, gi|530370041, gi|530370043, gi|530370045, gi|530370047, gi|530370049, gi|530370051, gi|530370053, gi|530370055, gi|530370057, gi|530370059, gi|530370061, gi|530370063, gi|530370065	365.132	N1H1F0S0G0	744.01	2229.01	3	-1	8.385	-1.5264	O-linked glycosylation
35267	35269	113.071	LPPGLLANFTLLR	gi|16418467	2204.77	N4H5F0S2G0	908.417	3629.64	4	-1	9.2956	1.3943	N-linked glycosylation
29859	29860	97.7637	LPPGLLANFTLLR	gi|16418467	1913.68	N4H5F0S1G0	1113.52	3338.54	3	0	8.3267	1.1174	N-linked glycosylation
29898	29900	97.876	LPPGLLANFTLLR	gi|16418467	1913.68	N4H5F0S1G0	835.642	3338.54	4	-1	6.3408	0.5475	N-linked glycosylation
33044	33048	106.759	GFGVAIVGNYTAALPTEAALR	gi|156616294, gi|578832955	2204.77	N4H5F0S2G0	1433.31	4295.9	3	-2	6.3276	1.2395	N-linked glycosylation
12517	12519	49.0303	DGSPDVTTADIGANTPDATK	gi|156616294, gi|578832955	656.228	N1H1F0S1G0	868.05	2602.13	3	0	13.2868	2.6567	O-linked glycosylation
15897	15899	58.5205	DGSPDVTTADIGANTPDATK	gi|156616294, gi|578832955	947.323	N1H1F0S2G0	965.415	2893.23	3	-1	12.4153	1.2714	O-linked glycosylation
15702	15705	57.9758	DGSPDVTTADIGANTPDATK	gi|156616294, gi|578832955	947.323	N1H1F0S2G0	965.416	2893.23	3	-1	11.3424	2.3473	O-linked glycosylation
10658	10667	43.8343	DGSPDVTTADIGANTPDATK	gi|156616294, gi|578832955	365.132	N1H1F0S0G0	771.015	2311.03	3	0	10.3283	-0.96929	O-linked glycosylation
13921	13928	52.9843	DGSPDVTTADIGANTPDATK	gi|156616294, gi|578832955	656.228	N1H1F0S1G0	868.382	2602.13	3	-1	9.3654	0.21813	O-linked glycosylation
24880	24882	83.7502	VCQDCPLLAPLNDTR	gi|156523970	2204.77	N4H5F0S2G0	995.413	3976.62	4	-2	16.2175	0.1128	N-linked glycosylation
19745	19746	69.3153	VCQDCPLLAPLNDTR	gi|156523970	1913.68	N4H5F0S1G0	1229.18	3685.53	3	0	15.2642	2.294	N-linked glycosylation
19784	19785	69.425	VCQDCPLLAPLNDTR	gi|156523970	1913.68	N4H5F0S1G0	922.638	3685.52	4	-2	15.2349	-0.15927	N-linked glycosylation
24880	24881	83.7478	VCQDCPLLAPLNDTR	gi|156523970	2204.77	N4H5F0S2G0	1326.21	3976.62	3	0	14.2375	-0.22277	N-linked glycosylation
28026	28030	92.607	AALAAFNAQNNGSNFQLEEISR	gi|156523970	2205.79	N4H5F2S1G0	1143.73	4570.91	4	-1	11.1386	-7.5096	N-linked glycosylation
21942	21950	75.5102	AALAAFNAQNNGSNFQLEEISR	gi|156523970	1913.68	N4H5F0S1G0	1070.71	4278.83	4	-1	10.216	0.44039	N-linked glycosylation
15585	15586	57.6425	VCQDCPLLAPLNDTR	gi|156523970	1622.58	N4H5F0S0G0	1132.15	3394.43	3	0	7.3357	0.81908	N-linked glycosylation
18874	18886	66.9	KVCQDCPLLAPLNDTR	gi|156523970	2204.77	N4H5F0S2G0	1027.43	4104.69	4	-2	5.3201	-6.5504	N-linked glycosylation
26154	26157	87.3338	AALAAFNAQNNGSNFQLEEISR	gi|156523970	2204.77	N4H5F0S2G0	1524.98	4569.93	3	-3	5.1593	0.05494	N-linked glycosylation
17626	17627	63.3758	TVVQPSVGAAAGPVVPPCPGR	gi|156523970	656.228	N1H1F0S1G0	891.439	2672.3	3	0	27.5214	1.3427	O-linked glycosylation
14363	14364	54.2107	TVVQPSVGAAAGPVVPPCPGR	gi|156523970	365.132	N1H1F0S0G0	794.406	2381.2	3	0	22.5434	0.12354	O-linked glycosylation
17678	17685	63.5373	TVVQPSVGAAAGPVVPPCPGR	gi|156523970	673.243	N1H2F1S0G0	897.114	2689.33	3	0	20.5753	5.3359	O-linked glycosylation
17808	17809	63.8865	TVVQPSVGAAAGPVVPPCPGR	gi|156523970	656.228	N1H1F0S1G0	891.438	2672.3	3	0	18.5906	0.17784	O-linked glycosylation
17483	17494	63.0012	TVVQPSVGAAAGPVVPPCPGR	gi|156523970	673.243	N1H2F1S0G0	897.109	2689.31	3	0	17.5677	-0.72374	O-linked glycosylation
21214	21215	73.4508	TVVQPSVGAAAGPVVPPCPGR	gi|156523970	947.323	N1H1F0S2G0	988.802	2963.39	3	-1	17.5649	-1.8581	O-linked glycosylation
14168	14174	53.6763	TVVQPSVGAAAGPVVPPCPGR	gi|156523970	365.132	N1H1F0S0G0	794.408	2381.21	3	0	14.5942	2.0459	O-linked glycosylation
14233	14235	53.8483	TVVQPSVGAAAGPVVPPCPGR	gi|156523970	365.132	N1H1F0S0G0	1191.1	2381.2	2	0	9.5478	-1.8961	O-linked glycosylation
27831	27834	92.0567	FSVATQTCQITPAEGPVVTAQYDCLGCVHPISTQSPDLEPILR	gi|156231037, gi|262050546, gi|4504893	656.228	N1H1F0S1G0	1084.11	5412.52	5	-4	13.2561	-2.3299	O-linked glycosylation
27805	27810	91.9887	FSVATQTCQITPAEGPVVTAQYDCLGCVHPISTQSPDLEPILR	gi|156231037, gi|262050546, gi|4504893	656.228	N1H1F0S1G0	1354.89	5412.53	4	-4	10.273	-0.77137	O-linked glycosylation
25478	25480	85.4307	FSVATQTCQITPAEGPVVTAQYDCLGCVHPISTQSPDLEPILR	gi|156231037, gi|262050546, gi|4504893	365.132	N1H1F0S0G0	1281.87	5121.45	4	-3	8.3198	1.8781	O-linked glycosylation
25283	25288	84.8897	FSVATQTCQITPAEGPVVTAQYDCLGCVHPISTQSPDLEPILR	gi|156231037, gi|262050546, gi|4504893	365.132	N1H1F0S0G0	1281.87	5121.44	4	-3	6.2684	1.2108	O-linked glycosylation
4091	4095	24.9877	EETTVSPPHTSMAPAQDEER	gi|156231037	730.264	N2H2F0S0G0	986.754	2958.24	3	0	28.2264	0.96027	O-linked glycosylation
4596	4597	26.7562	EETTVSPPHTSMAPAQDEER	gi|156231037	1021.36	N2H2F0S1G0	1083.78	3249.34	3	0	18.2682	-0.30977	O-linked glycosylation
7148	7149	33.9558	EETTVSPPHTSMAPAQDEER	gi|156231037	1312.46	N2H2F0S2G0	1181.15	3540.43	3	-1	16.2948	-0.52564	O-linked glycosylation
4753	4754	27.2603	EETTVSPPHTSMAPAQDEER	gi|156231037	1021.36	N2H2F0S1G0	1084.12	3249.34	3	-1	16.2495	-0.29034	O-linked glycosylation
4938	4939	27.7803	EETTVSPPHTSMAPAQDEER	gi|156231037	1021.36	N2H2F0S1G0	1083.78	3249.34	3	0	15.2582	-0.76058	O-linked glycosylation
4925	4927	27.7468	EETTVSPPHTSMAPAQDEER	gi|156231037	1021.36	N2H2F0S1G0	813.59	3249.33	4	-2	9.1607	-2.1156	O-linked glycosylation
8071	8082	36.5748	SVSEINPTTQMK	gi|156231037	947.323	N1H1F0S2G0	766.666	2297.98	3	0	8.2063	0.66417	O-linked glycosylation
4742	4744	27.2223	EETTVSPPHTSMAPAQDEER	gi|156231037	1021.36	N2H2F0S1G0	813.34	3249.33	4	-1	8.152	-1.6842	O-linked glycosylation
8266	8267	37.097	SVSEINPTTQMK	gi|156231037	947.323	N1H1F0S2G0	766.666	2297.98	3	0	7.3022	0.50481	O-linked glycosylation
4576	4579	26.7043	EETTVSPPHTSMAPAQDEER	gi|156231037	1021.36	N2H2F0S1G0	813.341	3249.34	4	-1	7.1709	-0.25663	O-linked glycosylation
8097	8100	36.6265	SVSEINPTTQMK	gi|156231037	947.323	N1H1F0S2G0	1150	2297.98	2	-1	6.3359	-0.31219	O-linked glycosylation
15598	15600	57.6817	TFVLSALQPSPTHSSSNTQR	gi|156119625, gi|261878614, gi|261878616, gi|261878618	656.228	N1H1F0S1G0	938.778	2814.32	3	0	24.3646	0.087371	O-linked glycosylation
12088	12089	47.8242	TFVLSALQPSPTHSSSNTQR	gi|156119625, gi|261878614, gi|261878616, gi|261878618	365.132	N1H1F0S0G0	841.746	2523.22	3	0	22.3796	0.75138	O-linked glycosylation
15780	15781	58.1897	TFVLSALQPSPTHSSSNTQR	gi|156119625, gi|261878614, gi|261878616, gi|261878618	656.228	N1H1F0S1G0	938.778	2814.32	3	0	22.3617	0.15243	O-linked glycosylation
12270	12272	48.3377	TFVLSALQPSPTHSSSNTQR	gi|156119625, gi|261878614, gi|261878616, gi|261878618	365.132	N1H1F0S0G0	842.077	2523.21	3	-1	14.3487	-3.2874	O-linked glycosylation
15962	15963	58.7007	TFVLSALQPSPTHSSSNTQR	gi|156119625, gi|261878614, gi|261878616, gi|261878618	656.228	N1H1F0S1G0	939.442	2814.3	3	-2	13.305	-4.2269	O-linked glycosylation
15598	15610	57.7078	TFVLSALQPSPTHSSSNTQR	gi|156119625, gi|261878614, gi|261878616, gi|261878618	656.228	N1H1F0S1G0	704.837	2814.32	4	-2	11.2884	0.47478	O-linked glycosylation
11893	11897	47.2862	TFVLSALQPSPTHSSSNTQR	gi|156119625, gi|261878614, gi|261878616, gi|261878618	365.132	N1H1F0S0G0	841.745	2523.22	3	0	10.3956	-0.40971	O-linked glycosylation
19654	19662	69.0782	TFVLSALQPSPTHSSSNTQR	gi|156119625, gi|261878614, gi|261878616, gi|261878618	947.323	N1H1F0S2G0	1036.48	3105.42	3	-2	10.3307	2.1829	O-linked glycosylation
12465	12472	48.8968	TFVLSALQPSPTHSSSNTQR	gi|156119625, gi|261878614, gi|261878616, gi|261878618	365.132	N1H1F0S0G0	842.077	2523.21	3	-1	8.3176	-3.7954	O-linked glycosylation
14376	14385	54.2675	TFVLSALQPSPTHSSSNTQR	gi|156119625, gi|261878614, gi|261878616, gi|261878618	1021.36	N2H2F0S1G0	1060.82	3179.45	3	-1	7.3237	-0.17089	O-linked glycosylation
16534	16536	60.3128	TFVLSALQPSPTHSSSNTQR	gi|156119625, gi|261878614, gi|261878616, gi|261878618	656.228	N1H1F0S1G0	939.442	2814.31	3	-2	7.2802	-4.1619	O-linked glycosylation
13141	13147	50.7912	TFVLSALQPSPTHSSSNTQR	gi|156119625, gi|261878614, gi|261878616, gi|261878618	365.132	N1H1F0S0G0	842.411	2523.21	3	-2	7.2713	-3.8429	O-linked glycosylation
15403	15410	57.1468	TFVLSALQPSPTHSSSNTQR	gi|156119625, gi|261878614, gi|261878616, gi|261878618	656.228	N1H1F0S1G0	939.447	2814.32	3	-2	6.3499	0.65273	O-linked glycosylation
16144	16150	59.2245	TFVLSALQPSPTHSSSNTQR	gi|156119625, gi|261878614, gi|261878616, gi|261878618	656.228	N1H1F0S1G0	938.777	2814.32	3	0	6.3216	-0.10782	O-linked glycosylation
10866	10876	44.4225	TFVLSALQPSPTHSSSNTQR	gi|156119625, gi|261878614, gi|261878616, gi|261878618	730.264	N2H2F0S0G0	964.125	2888.35	3	-2	6.2224	-0.6727	O-linked glycosylation
12946	12948	50.2328	TFVLSALQPSPTHSSSNTQR	gi|156119625, gi|261878614, gi|261878616, gi|261878618	365.132	N1H1F0S0G0	842.075	2523.21	3	-1	6.1868	-6.4804	O-linked glycosylation
19784	19792	69.4432	TFVLSALQPSPTHSSSNTQR	gi|156119625, gi|261878614, gi|261878616, gi|261878618	947.323	N1H1F0S2G0	777.357	3105.4	4	-1	5.2298	-2.873	O-linked glycosylation
8630	8631	38.1195	LGNWSAMPSCK	gi|153266841	1913.68	N4H5F0S1G0	1060.75	3180.24	3	0	9.3142	0.89291	N-linked glycosylation
12621	12622	49.3192	LGNWSAMPSCK	gi|153266841	2204.77	N4H5F0S2G0	1157.78	3471.34	3	0	9.2901	1.1867	N-linked glycosylation
6342	6346	31.7155	TPPQSQTPGALPAK	gi|145275213, gi|767938145, gi|767938147	1021.36	N2H2F0S1G0	805.375	2414.11	3	0	8.3937	0.19842	O-linked glycosylation
12712	12714	49.5763	TVLTPATNHMGNVTFTIPANR	gi|115298678	1378.48	N2H6F0S0G0	913.165	3649.64	4	0	19.3108	1.3085	N-linked glycosylation
12894	12895	50.0845	TVLTPATNHMGNVTFTIPANR	gi|115298678	1378.48	N2H6F0S0G0	1217.22	3649.63	3	0	17.356	0.17468	N-linked glycosylation
12712	12713	49.574	TVLTPATNHMGNVTFTIPANR	gi|115298678	1378.48	N2H6F0S0G0	1217.22	3649.64	3	0	17.3291	1.4791	N-linked glycosylation
12842	12843	49.9382	TVLTPATNHMGNVTFTIPANR	gi|115298678	1216.42	N2H5F0S0G0	1163.2	3487.58	3	0	17.3239	1.1467	N-linked glycosylation
12855	12856	49.9747	TVLTPATNHMGNVTFTIPANR	gi|115298678	1216.42	N2H5F0S0G0	872.65	3487.58	4	0	16.3676	-0.081987	N-linked glycosylation
15676	15678	57.9007	TVLTPATNHMGNVTFTIPANR	gi|115298678	1378.48	N2H6F0S0G0	1212.22	3633.64	3	-1	15.427	-0.23246	N-linked glycosylation
12881	12884	50.0532	TVLTPATNHMGNVTFTIPANR	gi|115298678	1216.42	N2H5F0S0G0	1163.2	3487.58	3	0	15.3408	0.41163	N-linked glycosylation
12907	12909	50.1235	TVLTPATNHMGNVTFTIPANR	gi|115298678	1378.48	N2H6F0S0G0	913.165	3649.64	4	0	14.3518	1.1078	N-linked glycosylation
13076	13077	50.5952	TVLTPATNHMGNVTFTIPANR	gi|115298678	1378.48	N2H6F0S0G0	1217.22	3649.63	3	0	13.3845	-0.026	N-linked glycosylation
13024	13025	50.4488	TVLTPATNHMGNVTFTIPANR	gi|115298678	1216.42	N2H5F0S0G0	1163.2	3487.58	3	0	12.4117	-0.84843	N-linked glycosylation
15689	15690	57.9343	TVLTPATNHMGNVTFTIPANR	gi|115298678	1378.48	N2H6F0S0G0	909.167	3633.64	4	0	12.3964	1.796	N-linked glycosylation
13089	13092	50.6368	TVLTPATNHMGNVTFTIPANR	gi|115298678	1378.48	N2H6F0S0G0	913.666	3649.63	4	-2	12.3774	0.741	N-linked glycosylation
12634	12635	49.3557	TVLTPATNHMGNVTFTIPANR	gi|115298678	1540.53	N2H7F0S0G0	953.676	3811.68	4	0	12.377	-0.5578	N-linked glycosylation
13440	13441	51.617	TVLTPATNHMGNVTFTIPANR	gi|115298678	1378.48	N2H6F0S0G0	1217.88	3649.62	3	-2	12.3688	-3.2023	N-linked glycosylation
12621	12624	49.3243	TVLTPATNHMGNVTFTIPANR	gi|115298678	1540.53	N2H7F0S0G0	1271.57	3811.68	3	-1	12.3526	-1.0824	N-linked glycosylation
14532	14533	54.685	TVLTPATNHMGNVTFTIPANR	gi|115298678	1378.48	N2H6F0S0G0	1217.55	3649.62	3	-1	12.3357	-4.1227	N-linked glycosylation
13258	13260	51.1088	TVLTPATNHMGNVTFTIPANR	gi|115298678	1378.48	N2H6F0S0G0	1217.22	3649.63	3	0	12.2128	0.87708	N-linked glycosylation
13258	13259	51.1062	TVLTPATNHMGNVTFTIPANR	gi|115298678	1378.48	N2H6F0S0G0	1217.88	3649.61	3	-2	12.1631	-5.3095	N-linked glycosylation
13024	13028	50.4567	TVLTPATNHMGNVTFTIPANR	gi|115298678	1054.37	N2H4F0S0G0	1109.85	3325.52	3	-2	11.3819	-1.8232	N-linked glycosylation
14584	14586	54.8332	TVLTPATNHMGNVTFTIPANR	gi|115298678	1378.48	N2H6F0S0G0	913.414	3649.63	4	-1	11.3547	-0.94866	N-linked glycosylation
15494	15501	57.4025	TVLTPATNHMGNVTFTIPANR	gi|115298678	1378.48	N2H6F0S0G0	909.418	3633.64	4	-1	10.4165	2.3509	N-linked glycosylation
12660	12665	49.4392	TVLTPATNHMGNVTFTIPANR	gi|115298678	1216.42	N2H5F0S0G0	872.653	3487.59	4	0	10.3817	2.7181	N-linked glycosylation
12647	12650	49.3972	TVLTPATNHMGNVTFTIPANR	gi|115298678	1216.42	N2H5F0S0G0	1163.54	3487.59	3	-1	10.3684	2.3198	N-linked glycosylation
9202	9204	39.7282	TVLTPATNHMGNVTFTIPANR	gi|115298678	1419.5	N3H5F0S0G0	923.673	3690.66	4	-1	10.1461	1.9094	N-linked glycosylation
13037	13039	50.4878	TVLTPATNHMGNVTFTIPANR	gi|115298678	1216.42	N2H5F0S0G0	873.153	3487.58	4	-2	9.3985	0.65425	N-linked glycosylation
12517	12525	49.046	TVLTPATNHMGNVTFTIPANR	gi|115298678	1378.48	N2H6F0S0G0	913.664	3649.63	4	-2	9.3821	-1.2658	N-linked glycosylation
13206	13208	50.9627	TVLTPATNHMGNVTFTIPANR	gi|115298678	1216.42	N2H5F0S0G0	1163.54	3487.59	3	-1	9.3575	3.4749	N-linked glycosylation
9475	9478	40.4968	TVLTPATNHMGNVTFTIPANR	gi|115298678	1378.48	N2H6F0S0G0	913.415	3649.63	4	-1	9.272	0.65681	N-linked glycosylation
13466	13468	51.6927	TVLTPATNHMGNVTFTIPANR	gi|115298678	1378.48	N2H6F0S0G0	913.167	3649.65	4	0	9.233	3.8505	N-linked glycosylation
13804	13805	52.6388	TVLTPATNHMGNVTFTIPANR	gi|115298678	1378.48	N2H6F0S0G0	1218.21	3649.61	3	-3	9.2219	-5.8943	N-linked glycosylation
9124	9127	39.5123	TVLTPATNHMGNVTFTIPANR	gi|115298678	1257.45	N3H4F0S0G0	883.159	3528.61	4	-1	9.1962	1.2547	N-linked glycosylation
12517	12521	49.0355	TVLTPATNHMGNVTFTIPANR	gi|115298678	1378.48	N2H6F0S0G0	1217.22	3649.64	3	0	8.3754	1.8805	N-linked glycosylation
12829	12841	49.9305	TVLTPATNHMGNVTFTIPANR	gi|115298678	1054.37	N2H4F0S0G0	1109.51	3325.51	3	-1	8.363	-3.494	N-linked glycosylation
15481	15486	57.361	TVLTPATNHMGNVTFTIPANR	gi|115298678	1378.48	N2H6F0S0G0	1212.22	3633.64	3	-1	8.3565	0.77538	N-linked glycosylation
12816	12824	49.8837	TVLTPATNHMGNVTFTIPANR	gi|115298678	1540.53	N2H7F0S0G0	1271.9	3811.68	3	-2	8.3266	0.18317	N-linked glycosylation
11776	11778	46.9518	TVLTPATNHMGNVTFTIPANR	gi|115298678	1378.48	N2H6F0S0G0	913.661	3649.62	4	-2	8.3119	-4.2761	N-linked glycosylation
13284	13285	51.1793	TVLTPATNHMGNVTFTIPANR	gi|115298678	1378.48	N2H6F0S0G0	913.913	3649.62	4	-3	8.1358	-3.523	N-linked glycosylation
14896	14897	55.7073	TVLTPATNHMGNVTFTIPANR	gi|115298678	1378.48	N2H6F0S0G0	1218.54	3649.6	3	-4	8.1304	-9.8907	N-linked glycosylation
12439	12451	48.837	TVLTPATNHMGNVTFTIPANR	gi|115298678	1540.53	N2H7F0S0G0	953.928	3811.68	4	-1	7.3249	0.16332	N-linked glycosylation
15156	15159	56.4427	TVLTPATNHMGNVTFTIPANR	gi|115298678	1872.65	N3H6F0S1G0	1036.71	4143.82	4	0	7.3177	4.5118	N-linked glycosylation
9319	9320	40.0537	TVLTPATNHMGNVTFTIPANR	gi|115298678	1257.45	N3H4F0S0G0	883.159	3528.61	4	-1	7.1622	0.70115	N-linked glycosylation
12855	12864	49.9955	TVLTPATNHMGNVTFTIPANR	gi|115298678	1054.37	N2H4F0S0G0	832.137	3325.53	4	0	6.3366	-0.13966	N-linked glycosylation
9514	9525	40.6268	TVLTPATNHMGNVTFTIPANR	gi|115298678	1216.42	N2H5F0S0G0	872.903	3487.58	4	-1	6.233	1.4762	N-linked glycosylation
11217	11227	45.4067	TVLTPATNHMGNVTFTIPANR	gi|115298678	1216.42	N2H5F0S0G0	873.4	3487.57	4	-3	6.2032	-2.8978	N-linked glycosylation
10346	10358	42.9677	TVLTPATNHMGNVTFTIPANR	gi|115298678	1257.45	N3H4F0S0G0	883.404	3528.58	4	-2	6.203	-5.7847	N-linked glycosylation
15442	15454	57.2693	TVLTPATNHMGNVTFTIPANR	gi|115298678	1540.53	N2H7F0S0G0	1266.91	3795.7	3	-3	5.3419	3.3632	N-linked glycosylation
22540	22541	77.1655	ALPQPQNVTSLLGCTH	gi|11321561, gi|530395269	1913.68	N4H5F0S1G0	1217.86	3649.56	3	-2	17.2853	0.027856	N-linked glycosylation
27493	27494	91.1	ALPQPQNVTSLLGCTH	gi|11321561, gi|530395269	2204.77	N4H5F0S2G0	986.421	3940.65	4	-2	17.2111	0.47127	N-linked glycosylation
18562	18565	66.006	ALPQPQNVTSLLGCTH	gi|11321561, gi|530395269	1622.58	N4H5F0S0G0	1120.16	3358.47	3	0	16.316	1.2473	N-linked glycosylation
27480	27481	91.0628	ALPQPQNVTSLLGCTH	gi|11321561, gi|530395269	2204.77	N4H5F0S2G0	1314.89	3940.66	3	-2	15.2477	0.90813	N-linked glycosylation
22722	22724	77.6818	ALPQPQNVTSLLGCTH	gi|11321561, gi|530395269	1913.68	N4H5F0S1G0	1217.86	3649.56	3	-2	12.2738	-0.37352	N-linked glycosylation
22579	22581	77.2785	ALPQPQNVTSLLGCTH	gi|11321561, gi|530395269	1913.68	N4H5F0S1G0	913.648	3649.56	4	-2	12.247	1.4292	N-linked glycosylation
27298	27304	90.5643	ALPQPQNVTSLLGCTH	gi|11321561, gi|530395269	2204.77	N4H5F0S2G0	986.422	3940.66	4	-2	11.2076	1.4625	N-linked glycosylation
28208	28209	93.1107	ALPQPQNVTSLLGCTH	gi|11321561, gi|530395269	2205.79	N4H5F2S1G0	1314.55	3941.64	3	0	10.1175	-8.914	N-linked glycosylation
23463	23464	79.763	ALPQPQNVTSLLGCTH	gi|11321561, gi|530395269	1914.7	N4H5F2S0G0	1217.52	3650.54	3	0	10.1106	-9.0725	N-linked glycosylation
22384	22387	76.7337	ALPQPQNVTSLLGCTH	gi|11321561, gi|530395269	1913.68	N4H5F0S1G0	913.646	3649.56	4	-2	9.2304	-0.37695	N-linked glycosylation
23281	23282	79.2503	ALPQPQNVTSLLGCTH	gi|11321561, gi|530395269	1914.7	N4H5F2S0G0	1217.85	3650.54	3	-1	9.1404	-9.3562	N-linked glycosylation
14220	14221	53.8088	SWPAVGNCSSALR	gi|11321561, gi|530395269	1913.68	N4H5F0S1G0	1107.12	3318.35	3	-1	8.3221	0.90312	N-linked glycosylation
27844	27845	92.088	ALPQPQNVTSLLGCTH	gi|11321561, gi|530395269	2204.77	N4H5F0S2G0	1314.56	3940.65	3	-1	8.2196	-0.68773	N-linked glycosylation
28247	28248	93.2198	ALPQPQNVTSLLGCTH	gi|11321561, gi|530395269	2205.79	N4H5F2S1G0	986.418	3941.64	4	-1	8.1011	-7.3837	N-linked glycosylation
27285	27293	90.5332	ALPQPQNVTSLLGCTH	gi|11321561, gi|530395269	2204.77	N4H5F0S2G0	1314.55	3940.65	3	-1	7.201	-1.71	N-linked glycosylation
22345	22355	76.6432	ALPQPQNVTSLLGCTH	gi|11321561, gi|530395269	1913.68	N4H5F0S1G0	1217.52	3649.54	3	-1	7.1652	-4.806	N-linked glycosylation
18497	18505	65.8378	ALPQPQNVTSLLGCTH	gi|11321561, gi|530395269	1622.58	N4H5F0S0G0	840.622	3358.46	4	-1	7.1644	0.35365	N-linked glycosylation
28572	28573	94.1375	ALPQPQNVTSLLGCTH	gi|11321561, gi|530395269	2205.79	N4H5F2S1G0	1315.22	3941.63	3	-2	7.1047	-9.904	N-linked glycosylation
23099	23101	78.7403	ALPQPQNVTSLLGCTH	gi|11321561, gi|530395269	1913.68	N4H5F0S1G0	1218.18	3649.53	3	-3	6.1186	-7.9824	N-linked glycosylation
14402	14403	54.3198	SWPAVGNCSSALR	gi|11321561, gi|530395269	1913.68	N4H5F0S1G0	1107.12	3318.35	3	-1	5.3248	0.79276	N-linked glycosylation
18679	18680	66.3275	SWPAVGNCSSALR	gi|11321561, gi|530395269	2204.77	N4H5F0S2G0	1204.16	3609.45	3	-1	5.2892	2.8082	N-linked glycosylation
4117	4121	25.059	TPLPPTSAHGNVAEGETKPDPDVTER	gi|11321561, gi|530395269	1095.4	N3H3F0S0G0	953.688	3810.72	4	-1	30.3224	1.1763	O-linked glycosylation
8994	8995	39.1428	TPLPPTSAHGNVAEGETKPDPDVTER	gi|11321561, gi|530395269	1312.46	N2H2F0S2G0	1008.2	4027.78	4	-2	29.3101	-0.20646	O-linked glycosylation
4951	4952	27.8163	TPLPPTSAHGNVAEGETKPDPDVTER	gi|11321561, gi|530395269	730.264	N2H2F0S0G0	862.152	3445.58	4	0	29.3022	-0.87908	O-linked glycosylation
4104	4111	25.031	TPLPPTSAHGNVAEGETKPD	gi|11321561, gi|530395269	730.264	N2H2F0S0G0	916.754	2748.25	3	0	29.273	-0.57751	O-linked glycosylation
4117	4120	25.0565	TPLPPTSAHGNVAEGETKPD	gi|11321561, gi|530395269	365.132	N1H1F0S0G0	795.045	2383.12	3	0	29.216	1.4589	O-linked glycosylation
7824	7825	35.8562	TPLPPTSAHGNVAEGETKPDPDVTER	gi|11321561, gi|530395269	656.228	N1H1F0S1G0	843.897	3371.56	4	-1	28.2834	2.794	O-linked glycosylation
6979	6980	33.4845	TPLPPTSAHGNVAEGETKPDPDVTER	gi|11321561, gi|530395269	1021.36	N2H2F0S1G0	935.176	3736.68	4	-1	27.2964	-0.97392	O-linked glycosylation
6784	6787	32.9455	TPLPPTSAHGNVAEGETKPDPDVTER	gi|11321561, gi|530395269	1021.36	N2H2F0S1G0	935.179	3736.69	4	-1	27.2894	2.2275	O-linked glycosylation
7161	7162	33.9922	TPLPPTSAHGNVAEGETKPDPDVTER	gi|11321561, gi|530395269	1021.36	N2H2F0S1G0	934.928	3736.69	4	0	27.2797	1.492	O-linked glycosylation
9176	9177	39.6528	TPLPPTSAHGNVAEGETKPDPDVTER	gi|11321561, gi|530395269	1312.46	N2H2F0S2G0	1008.2	4027.78	4	-2	26.3123	0.035995	O-linked glycosylation
4764	4765	27.294	TPLPPTSAHGNVAEGETKPDPDVTER	gi|11321561, gi|530395269	730.264	N2H2F0S0G0	862.153	3445.59	4	0	26.3072	0.46719	O-linked glycosylation
8006	8007	36.3665	TPLPPTSAHGNVAEGETKPDPDVTER	gi|11321561, gi|530395269	656.228	N1H1F0S1G0	843.895	3371.55	4	-1	25.285	1.4182	O-linked glycosylation
5133	5134	28.3253	TPLPPTSAHGNVAEGETKPDPDVTER	gi|11321561, gi|530395269	730.264	N2H2F0S0G0	862.153	3445.59	4	0	24.3124	0.82147	O-linked glycosylation
5705	5706	29.9298	TPLPPTSAHGNVAEGETKPDPDVTER	gi|11321561, gi|530395269	365.132	N1H1F0S0G0	770.87	3080.46	4	0	24.2865	0.40298	O-linked glycosylation
7642	7643	35.3458	TPLPPTSAHGNVAEGETKPDPDVTER	gi|11321561, gi|530395269	656.228	N1H1F0S1G0	843.644	3371.55	4	0	24.283	0.53051	O-linked glycosylation
9878	9879	41.625	TPLPPTSAHGNVAEGETKPDPDVTER	gi|11321561, gi|530395269	947.323	N1H1F0S2G0	916.919	3662.65	4	-2	24.2674	0.40561	O-linked glycosylation
6550	6552	32.2883	TPLPPTSAHGNVAEGETKPD	gi|11321561, gi|530395269	656.228	N1H1F0S1G0	892.075	2674.21	3	0	23.2323	-0.48095	O-linked glycosylation
5861	5862	30.3667	TPLPPTSAHGNVAEGETKPDPDVTER	gi|11321561, gi|530395269	365.132	N1H1F0S0G0	1027.82	3080.45	3	-1	22.3844	-0.84053	O-linked glycosylation
5900	5904	30.4832	TPLPPTSAHGNVAEGETKPDPDVTER	gi|11321561, gi|530395269	365.132	N1H1F0S0G0	1027.49	3080.45	3	0	22.377	-1.2177	O-linked glycosylation
5887	5888	30.4392	TPLPPTSAHGNVAEGETKPDPDVTER	gi|11321561, gi|530395269	365.132	N1H1F0S0G0	771.121	3080.46	4	-1	22.2872	1.2953	O-linked glycosylation
9358	9360	40.1657	TPLPPTSAHGNVAEGETKPDPDVTER	gi|11321561, gi|530395269	1312.46	N2H2F0S2G0	1008.2	4027.78	4	-2	21.3036	0.035995	O-linked glycosylation
8188	8189	36.8767	TPLPPTSAHGNVAEGETKPDPDVTER	gi|11321561, gi|530395269	656.228	N1H1F0S1G0	843.644	3371.55	4	0	20.2809	0.31327	O-linked glycosylation
5900	5901	30.4753	TPLPPTSAHGNVAEGETKPDPDVTER	gi|11321561, gi|530395269	1386.49	N3H3F0S1G0	1026.71	4101.81	4	-2	18.3377	-0.36539	O-linked glycosylation
8630	8632	38.1222	TPLPPTSAHGNVAEGETKPDPDVTER	gi|11321561, gi|530395269	1312.46	N2H2F0S2G0	1007.95	4027.78	4	-1	18.3172	0.44462	O-linked glycosylation
7525	7527	35.0183	TPLPPTSAHGNVAEGETKPDPDVTER	gi|11321561, gi|530395269	1021.36	N2H2F0S1G0	935.425	3736.67	4	-2	18.2837	-2.9825	O-linked glycosylation
7811	7814	35.8252	TPLPPTSAHGNVAEGETKPDPDVTER	gi|11321561, gi|530395269	656.228	N1H1F0S1G0	1125.19	3371.55	3	-2	17.3658	0.28203	O-linked glycosylation
7863	7864	35.9655	TPLPPTSAHGNVAEGETKPDPDVTER	gi|11321561, gi|530395269	1677.59	N3H3F0S2G0	1099.23	4392.91	4	-1	17.3566	0.15806	O-linked glycosylation
8370	8371	37.3893	TPLPPTSAHGNVAEGETKPDPDVTER	gi|11321561, gi|530395269	656.228	N1H1F0S1G0	844.142	3371.54	4	-2	17.2838	-3.5595	O-linked glycosylation
6459	6461	32.034	TPLPPTSAHGNVAEGETKPDPDVTER	gi|11321561, gi|530395269	365.132	N1H1F0S0G0	771.366	3080.43	4	-2	16.3172	-6.6097	O-linked glycosylation
5315	5316	28.8373	TPLPPTSAHGNVAEGETKPDPDVTER	gi|11321561, gi|530395269	730.264	N2H2F0S0G0	862.153	3445.59	4	0	16.3116	0.75061	O-linked glycosylation
6069	6070	30.9485	TPLPPTSAHGNVAEGETKPDPDVTER	gi|11321561, gi|530395269	365.132	N1H1F0S0G0	771.12	3080.45	4	-1	16.3009	-0.21056	O-linked glycosylation
5562	5564	29.5343	TPLPPTSAHGNVAEGETKPD	gi|11321561, gi|530395269	1021.36	N2H2F0S1G0	1013.79	3039.34	3	0	16.2925	-0.40238	O-linked glycosylation
8006	8008	36.3692	TPLPPTSAHGNVAEGETKPDPDVTER	gi|11321561, gi|530395269	656.228	N1H1F0S1G0	1124.52	3371.55	3	0	15.4054	-0.8416	O-linked glycosylation
7031	7033	33.6328	TPLPPTSAHGNVAEGETKPDPDVTER	gi|11321561, gi|530395269	365.132	N1H1F0S0G0	771.366	3080.44	4	-2	15.324	-6.2134	O-linked glycosylation
8552	8553	37.9005	TPLPPTSAHGNVAEGETKPDPDVTER	gi|11321561, gi|530395269	656.228	N1H1F0S1G0	844.14	3371.53	4	-2	15.2723	-5.7319	O-linked glycosylation
9553	9555	40.7127	TPLPPTSAHGNVAEGETKPDPDVTER	gi|11321561, gi|530395269	1313.48	N2H2F2S1G0	1008.45	4028.78	4	-2	15.222	-5.5729	O-linked glycosylation
4605	4606	26.7828	TPLPPTSAHGNVAEGETKPDPDVTER	gi|11321561, gi|530395269	730.264	N2H2F0S0G0	862.403	3445.59	4	-1	14.3186	-0.43562	O-linked glycosylation
5497	5498	29.3492	TPLPPTSAHGNVAEGETKPDPDVTER	gi|11321561, gi|530395269	730.264	N2H2F0S0G0	862.651	3445.57	4	-2	14.303	-4.031	O-linked glycosylation
6264	6265	31.49	TPLPPTSAHGNVAEGETKPDPDVTER	gi|11321561, gi|530395269	365.132	N1H1F0S0G0	771.118	3080.44	4	-1	14.3024	-3.2222	O-linked glycosylation
5705	5708	29.9352	TPLPPTSAHGNVAEGETKPDPDVTER	gi|11321561, gi|530395269	1386.49	N3H3F0S1G0	1026.46	4101.81	4	-1	13.3837	-0.38078	O-linked glycosylation
8734	8735	38.4123	TPLPPTSAHGNVAEGETKPDPDVTER	gi|11321561, gi|530395269	656.228	N1H1F0S1G0	843.642	3371.55	4	0	13.3048	-1.2798	O-linked glycosylation
10060	10061	42.1375	TPLPPTSAHGNVAEGETKPDPDVTER	gi|11321561, gi|530395269	947.323	N1H1F0S2G0	916.92	3662.65	4	-2	13.2756	1.0722	O-linked glycosylation
5679	5690	29.8837	TPLPPTSAHGNVAEGETKPDPDVTER	gi|11321561, gi|530395269	365.132	N1H1F0S0G0	1027.49	3080.46	3	0	12.371	0.80333	O-linked glycosylation
6836	6842	33.0987	TPLPPTSAHGNVAEGETKPDPDVTER	gi|11321561, gi|530395269	365.132	N1H1F0S0G0	771.617	3080.44	4	-3	12.3571	-6.2722	O-linked glycosylation
8045	8049	36.4837	TPLPPTSAHGNVAEGETKPDPDVTER	gi|11321561, gi|530395269	1677.59	N3H3F0S2G0	1099.48	4392.91	4	-2	12.3527	-0.60563	O-linked glycosylation
9111	9113	39.4735	TPLPPTSAHGNVAEGETKPDPDVTER	gi|11321561, gi|530395269	1312.46	N2H2F0S2G0	1343.93	4027.77	3	-2	11.4896	-1.3853	O-linked glycosylation
7135	7138	33.9248	TPLPPTSAHGNVAEGETKPDPDVTER	gi|11321561, gi|530395269	1021.36	N2H2F0S1G0	1246.9	3736.68	3	-2	11.4613	-0.56166	O-linked glycosylation
6940	6944	33.3835	TPLPPTSAHGNVAEGETKPDPDVTER	gi|11321561, gi|530395269	1021.36	N2H2F0S1G0	1246.9	3736.69	3	-2	11.4385	0.90841	O-linked glycosylation
7226	7228	34.1778	TPLPPTSAHGNVAEGETKPDPDVTER	gi|11321561, gi|530395269	365.132	N1H1F0S0G0	771.367	3080.44	4	-2	11.3956	-5.7379	O-linked glycosylation
8916	8917	38.9232	TPLPPTSAHGNVAEGETKPDPDVTER	gi|11321561, gi|530395269	656.228	N1H1F0S1G0	844.142	3371.54	4	-2	11.3175	-3.5595	O-linked glycosylation
5367	5371	28.991	TPLPPTSAHGNVAEGETKPD	gi|11321561, gi|530395269	1021.36	N2H2F0S1G0	1013.79	3039.34	3	0	11.2678	-1.0651	O-linked glycosylation
8097	8099	36.624	TPLPPTSAHGNVAEGETKPDPDVTER	gi|11321561, gi|530395269	1022.38	N2H2F2S0G0	935.675	3737.67	4	-2	11.2396	-9.0927	O-linked glycosylation
6654	6655	32.5768	TPLPPTSAHGNVAEGETKPDPDVTER	gi|11321561, gi|530395269	365.132	N1H1F0S0G0	770.869	3080.45	4	0	10.3427	-1.2614	O-linked glycosylation
8305	8307	37.2092	TPLPPTSAHGNVAEGETKPD	gi|11321561, gi|530395269	1312.46	N2H2F0S2G0	1111.15	3330.44	3	-1	10.2916	-0.073975	O-linked glycosylation
5757	5758	30.0753	TPLPPTSAHGNVAEGETKPD	gi|11321561, gi|530395269	1021.36	N2H2F0S1G0	1014.12	3039.34	3	-1	10.2441	-1.2853	O-linked glycosylation
5003	5004	27.9603	TPLPPTSAHGNVAEGETKPDPDVTER	gi|11321561, gi|530395269	730.264	N2H2F0S0G0	1149.54	3445.59	3	-1	9.4637	0.17029	O-linked glycosylation
4169	4174	25.2043	TPLPPTSAHGNVAEGETKPDPDVTER	gi|11321561, gi|530395269	365.132	N1H1F0S0G0	617.097	3080.45	5	-1	9.3887	-2.1564	O-linked glycosylation
7668	7671	35.4238	TPLPPTSAHGNVAEGETKPDPDVTER	gi|11321561, gi|530395269	1677.59	N3H3F0S2G0	1099.49	4392.92	4	-2	9.3307	1.284	O-linked glycosylation
9111	9114	39.476	TPLPPTSAHGNVAEGETKPDPDVTER	gi|11321561, gi|530395269	1312.46	N2H2F0S2G0	806.362	4027.78	5	0	9.2805	0.53191	O-linked glycosylation
6355	6365	31.7668	TPLPPTSAHGNVAEGETKPD	gi|11321561, gi|530395269	656.228	N1H1F0S1G0	892.408	2674.21	3	-1	9.2267	-2.0322	O-linked glycosylation
6745	6746	32.8315	TPLPPTSAHGNVAEGETKPD	gi|11321561, gi|530395269	656.228	N1H1F0S1G0	892.077	2674.22	3	0	9.1534	2.1894	O-linked glycosylation
6082	6084	30.9875	TPLPPTSAHGNVAEGETKPDPDVTER	gi|11321561, gi|530395269	1386.49	N3H3F0S1G0	1026.46	4101.81	4	-1	8.3592	-0.26174	O-linked glycosylation
5679	5680	29.8577	TPLPPTSAHGNVAEGETKPDPDVTER	gi|11321561, gi|530395269	730.264	N2H2F0S0G0	862.4	3445.57	4	-1	8.313	-4.3327	O-linked glycosylation
8331	8339	37.2982	TPLPPTSAHGNVAEGETKPDPDVTER	gi|11321561, gi|530395269	1313.48	N2H2F2S1G0	1008.95	4028.78	4	-4	8.2904	-5.3598	O-linked glycosylation
7941	7947	36.1978	TPLPPTSAHGNVAEGETKPDPDVTER	gi|11321561, gi|530395269	1677.59	N3H3F0S2G0	879.988	4392.9	5	-3	8.2709	-2.7477	O-linked glycosylation
7707	7709	35.5313	TPLPPTSAHGNVAEGETKPDPDVTER	gi|11321561, gi|530395269	1021.36	N2H2F0S1G0	934.927	3736.68	4	0	8.2661	0.44658	O-linked glycosylation
7902	7906	36.0827	TPLPPTSAHGNVAEGETKPDPDVTER	gi|11321561, gi|530395269	1021.36	N2H2F0S1G0	935.425	3736.67	4	-2	8.2442	-3.1785	O-linked glycosylation
10437	10441	43.2008	TPLPPTSAHGNVAEGETKPDPDVTER	gi|11321561, gi|530395269	947.323	N1H1F0S2G0	916.917	3662.64	4	-2	8.2361	-2.2607	O-linked glycosylation
4426	4428	26.2307	TPLPPTSAHGNVAEGETKPDPDVTER	gi|11321561, gi|530395269	365.132	N1H1F0S0G0	617.097	3080.45	5	-1	7.4188	-1.661	O-linked glycosylation
4156	4168	25.1862	TPLPPTSAHGNVAEGETKPDPDVTER	gi|11321561, gi|530395269	365.132	N1H1F0S0G0	771.122	3080.46	4	-1	7.3469	2.7219	O-linked glycosylation
6914	6924	33.327	TPLPPTSAHGNVAEGETKPDPDVTER	gi|11321561, gi|530395269	1021.36	N2H2F0S1G0	748.342	3736.67	5	-1	7.3069	-2.48	O-linked glycosylation
5978	5980	30.696	TPLPPTSAHGNVAEGETKPDPDVTER	gi|11321561, gi|530395269	656.228	N1H1F0S1G0	675.317	3371.55	5	-1	7.2187	-0.55877	O-linked glycosylation
9215	9216	39.762	TPLPPTSAHGNVAEGETKPDPDVTER	gi|11321561, gi|530395269	1282.48	N4H2F1S0G0	1000.7	3997.77	4	-2	7.21	-8.5186	O-linked glycosylation
5224	5228	28.5897	TPLPPTSAHGNVAEGETKPDPDVTER	gi|11321561, gi|530395269	1021.36	N2H2F0S1G0	748.343	3736.68	5	-1	7.2091	-0.68327	O-linked glycosylation
5497	5501	29.3568	TPLPPTSAHGNVAEGETKPD	gi|11321561, gi|530395269	1021.36	N2H2F0S1G0	760.844	3039.35	4	-1	7.1695	1.7429	O-linked glycosylation
5874	5882	30.421	TPLPPTSAHGNVAEGETKPDPDVTER	gi|11321561, gi|530395269	527.185	N1H2F0S0G0	811.884	3242.5	4	-2	6.4228	-0.95374	O-linked glycosylation
7525	7537	35.0443	TPLPPTSAHGNVAEGETKPDPDVTER	gi|11321561, gi|530395269	656.228	N1H1F0S1G0	1125.19	3371.55	3	-2	6.412	0.93374	O-linked glycosylation
7252	7260	34.266	TPLPPTSAHGNVAEGETKPDPDVTER	gi|11321561, gi|530395269	859.307	N2H1F0S1G0	894.662	3574.62	4	-1	6.3297	-2.8438	O-linked glycosylation
7447	7457	34.8198	TPLPPTSAHGNVAEGETKPDPDVTER	gi|11321561, gi|530395269	656.228	N1H1F0S1G0	844.142	3371.54	4	-2	6.3203	-4.0664	O-linked glycosylation
5783	5790	30.1637	TPLPPTSAHGNVAEGETKPDPDVTER	gi|11321561, gi|530395269	656.228	N1H1F0S1G0	675.114	3371.54	5	0	6.3059	-3.2024	O-linked glycosylation
5861	5866	30.377	TPLPPTSAHGNVAEGETKPDPDVTER	gi|11321561, gi|530395269	730.264	N2H2F0S0G0	862.152	3445.59	4	0	6.2986	-0.5248	O-linked glycosylation
4938	4941	27.7855	TPLPPTSAHGNVAEGETKPDPDVTER	gi|11321561, gi|530395269	1021.36	N2H2F0S1G0	748.341	3736.67	5	-1	6.2385	-2.8067	O-linked glycosylation
5029	5034	28.0433	TPLPPTSAHGNVAEGETKPDPDVTER	gi|11321561, gi|530395269	1021.36	N2H2F0S1G0	748.143	3736.69	5	0	6.2279	0.7699	O-linked glycosylation
8136	8140	36.7387	TPLPPTSAHGNVAEGETKPD	gi|11321561, gi|530395269	1312.46	N2H2F0S2G0	833.616	3330.44	4	-1	6.2208	0.068873	O-linked glycosylation
5679	5691	29.8862	TPLPPTSAHGNVAEGETKPDPDVTER	gi|11321561, gi|530395269	527.185	N1H2F0S0G0	811.633	3242.5	4	-1	5.3885	-0.82263	O-linked glycosylation
4612	4621	26.8242	TPLPPTSAHGNVAEGETKPDPDVTER	gi|11321561, gi|530395269	365.132	N1H1F0S0G0	616.897	3080.45	5	0	5.3014	-0.29456	O-linked glycosylation
5471	5475	29.2837	TPLPPTSAHGNVAEGETKPDPDVTER	gi|11321561, gi|530395269	656.228	N1H1F0S1G0	675.317	3371.55	5	-1	5.2853	-0.19671	O-linked glycosylation
8240	8245	37.034	TPLPPTSAHGNVAEGETKPDPDVTER	gi|11321561, gi|530395269	1677.59	N3H3F0S2G0	1099.48	4392.91	4	-2	5.2846	-0.60563	O-linked glycosylation
5133	5137	28.3332	TPLPPTSAHGNVAEGETKPDPDVTER	gi|11321561, gi|530395269	568.212	N2H1F0S0G0	821.888	3283.53	4	-1	5.2193	-2.2216	O-linked glycosylation
6914	6923	33.3243	TPLPPTSAHGNVAEGETKPDPDVTER	gi|11321561, gi|530395269	1312.46	N2H2F0S2G0	806.763	4027.78	5	-2	5.1867	0.26019	O-linked glycosylation
4130	4137	25.1015	FVEGSHNSTVSLTTK	gi|105990532	1622.58	N4H5F0S0G0	1077.47	3229.39	3	-1	23.4086	1.5267	N-linked glycosylation
4143	4149	25.1348	FVEGSHNSTVSLTTK	gi|105990532	1257.45	N3H4F0S0G0	955.76	2864.26	3	-1	7.4727	0.93216	N-linked glycosylation
6134	6144	31.1527	FVEGSHNSTVSLTTK	gi|105990532	1710.6	N3H5F0S1G0	1106.47	3317.39	3	0	7.2031	-3.4295	N-linked glycosylation
23801	23809	80.7303	FEVDSPVYNATWSASLK	gi|105990532	1913.68	N4H5F0S1G0	957.909	3827.61	4	-1	7.1673	1.3971	N-linked glycosylation
6082	6094	31.0135	FVEGSHNSTVSLTTK	gi|105990532	1913.68	N4H5F0S1G0	881.129	3520.49	4	-1	6.3655	1.2403	N-linked glycosylation
23970	23972	81.1902	FEVDSPVYNATWSASLK	gi|105990532	1913.68	N4H5F0S1G0	1277.21	3827.6	3	-2	6.2591	-0.6242	N-linked glycosylation

## Sheet: MAX
MAX: glycopeptides of human serum were enriched by Oasis MAX Cartridge and analyzed by LC-MS/MS. GPQuest was used to identify the intact glycopeptides.
MS1 Scan Number	MS2 Scan Number	Retention Time (mins)	Peptide Sequence	RafSeq accession number	Candidate Glycan Exact Mass	Candidate Glycan Composition	Precursor Mz	Precursor Mass	Precursor Charge	Mass Shift	PSM Score Morpheus	Matching Error in ppm	Glycosylation type annotation
26131	26135	87.7092	ELCTISHIFIPAMGNITYDFSFK	gi|105990532	1378.48	N2H6F0S0G0	1367.94	4098.78	3	-3	9.4883	-0.4387	N-linked glycosylation
5093	5094	28.515	ISEENETTCYMGK	gi|62739186	1913.68	N4H5F0S1G0	1164.78	3491.32	3	-1	6.3199	0.19065	N-linked glycosylation
37467	37471	119.767	ISALGLPTNLTHILLFGMGR	gi|4758460	2188.74	N2H11F0S0G0	1083.49	4328.93	4	-2	5.2591	-1.3989	N-linked glycosylation
6710	6716	33.0792	SCDTPPPCPR	gi|9857757	947.323	N1H1F0S2G0	711.946	2133.82	3	0	7.3183	0.20349	O-linked glycosylation
29823	29831	98.121	NISDGFDGIPDNVDAALALPAHSYSGR	gi|88853069	2205.79	N4H5F2S1G0	996.428	4978.11	5	0	10.3071	-1.1849	N-linked glycosylation
29784	29792	98.0107	NISDGFDGIPDNVDAALALPAHSYSGR	gi|88853069	2204.77	N4H5F0S2G0	1245.53	4977.1	4	-2	9.3809	0.8813	N-linked glycosylation
29979	29981	98.545	NISDGFDGIPDNVDAALALPAHSYSGR	gi|88853069	2204.77	N4H5F0S2G0	1245.53	4977.08	4	-2	9.3407	-2.5524	N-linked glycosylation
29836	29839	98.1443	NISDGFDGIPDNVDAALALPAHSYSGR	gi|88853069	2204.77	N4H5F0S2G0	996.625	4977.09	5	-2	8.3222	-1.7333	N-linked glycosylation
26378	26382	88.404	NISDGFDGIPDNVDAALALPAHSYSGR	gi|88853069	1913.68	N4H5F0S1G0	1563.67	4685.99	3	-3	6.3373	-1.4309	N-linked glycosylation
16797	16800	61.462	NGSLFAFR	gi|88853069	1710.6	N3H5F0S1G0	875.03	2622.07	3	-1	5.5212	0.04065	N-linked glycosylation
13391	13398	51.8848	NNATVHEQVGGPSLTSDLQAQSK	gi|88853069	2204.77	N4H5F0S2G0	1530.32	4585.93	3	-3	5.2904	-2.0596	N-linked glycosylation
10778	10780	44.5255	NNATVHEQVGGPSLTSDLQAQSK	gi|88853069	1913.68	N4H5F0S1G0	1075.22	4294.85	4	-3	5.2839	1.8486	N-linked glycosylation
7802	7809	36.1562	GVNFNVSK	gi|767931868, gi|767931870, gi|767931872, gi|767931874, gi|78191798	1913.68	N4H5F0S1G0	1390.07	2778.13	2	-1	5.4822	-2.2418	N-linked glycosylation
6593	6600	32.7518	VATTVISK	gi|73858568, gi|73858570	1312.46	N2H2F0S2G0	710.99	2130.96	3	0	5.4008	0.60698	O-linked glycosylation
19462	19463	68.9452	NLSMPLLPADFHK	gi|73858566	2204.77	N4H5F0S2G0	1235.52	3703.55	3	-1	12.3366	0.45976	N-linked glycosylation
15458	15462	57.697	NLSMPLLPADFHK	gi|73858566	1913.68	N4H5F0S1G0	854.119	3412.45	4	-1	7.4054	-0.30897	N-linked glycosylation
15653	15655	58.2392	NLSMPLLPADFHK	gi|73858566	1913.68	N4H5F0S1G0	853.869	3412.45	4	0	7.4006	0.45952	N-linked glycosylation
20723	20725	72.4963	NLSMPLLPADFHK	gi|73858566	1913.68	N4H5F0S1G0	1133.49	3396.46	3	-2	5.3638	0.44291	N-linked glycosylation
15679	15681	58.3125	NLSMPLLPADFHK	gi|73858566	1913.68	N4H5F0S1G0	1138.16	3412.46	3	0	5.3265	1.6079	N-linked glycosylation
20541	20546	71.9928	NLSMPLLPADFHK	gi|73858566	1913.68	N4H5F0S1G0	1132.83	3396.46	3	0	5.2825	2.3465	N-linked glycosylation
20528	20539	71.9722	NLSMPLLPADFHK	gi|73858566	2059.73	N4H5F1S1G0	1182.18	3542.52	3	-2	5.248	1.8265	N-linked glycosylation
6606	6612	32.7862	GAFISNFSMTVDGK	gi|70778918	1540.53	N2H7F0S0G0	1006.43	3014.25	3	-3	5.3379	7.1502	N-linked glycosylation
7724	7727	35.9255	GAFISNFSMTVDGK	gi|70778918	1378.48	N2H6F0S0G0	951.406	2852.2	3	0	5.3248	7.8982	N-linked glycosylation
21867	21871	75.7192	SPYYNVSDEISFHCYDGYTLR	gi|67782358	1913.68	N4H5F0S1G0	1125.7	4499.79	4	0	6.3395	-1.6295	N-linked glycosylation
8231	8232	37.3497	IPCSQPPQIEHGTINSSR	gi|62739186	1913.68	N4H5F0S1G0	984.674	3934.67	4	-1	14.2363	1.5842	N-linked glycosylation
8244	8245	37.3862	IPCSQPPQIEHGTINSSR	gi|62739186	1913.68	N4H5F0S1G0	1312.56	3934.67	3	-1	6.2735	0.56361	N-linked glycosylation
10791	10792	44.5593	IPCSQPPQIEHGTINSSR	gi|62739186	2204.77	N4H5F0S2G0	1057.7	4225.76	4	-2	6.2073	1.0418	N-linked glycosylation
22595	22596	77.7488	SLGNVNFTVSAEALESQELCGTEVPSVPEHGR	gi|578822814, gi|66932947	1216.42	N2H5F0S0G0	1158.27	4630.05	4	0	31.4401	0.33722	N-linked glycosylation
38169	38178	121.766	GCVLLSYLNETVTVSASLESVR	gi|578822814, gi|66932947	2204.77	N4H5F0S2G0	1151.76	4602	4	-2	26.401	-1.1672	N-linked glycosylation
38247	38257	121.984	VSNQTLSLFFTVLQDVPVR	gi|578822814, gi|66932947	2204.77	N4H5F0S2G0	1093.24	4367.93	4	-2	21.425	-4.9362	N-linked glycosylation
22777	22779	78.264	SLGNVNFTVSAEALESQELCGTEVPSVPEHGR	gi|578822814, gi|66932947	1216.42	N2H5F0S0G0	1158.77	4630.05	4	-2	19.5002	0.25903	N-linked glycosylation
37051	37052	118.578	VSNQTLSLFFTVLQDVPVR	gi|578822814, gi|66932947	2059.73	N4H5F1S1G0	1056.99	4222.92	4	-2	17.4833	1.4618	N-linked glycosylation
22959	22961	78.7767	SLGNVNFTVSAEALESQELCGTEVPSVPEHGR	gi|578822814, gi|66932947	1216.42	N2H5F0S0G0	1158.27	4630.04	4	0	17.4436	-2.932	N-linked glycosylation
22634	22635	77.8587	SLGNVNFTVSAEALESQELCGTEVPSVPEHGR	gi|578822814, gi|66932947	1216.42	N2H5F0S0G0	1544.69	4630.06	3	-2	16.6153	1.7382	N-linked glycosylation
23141	23143	79.2882	SLGNVNFTVSAEALESQELCGTEVPSVPEHGR	gi|578822814, gi|66932947	1216.42	N2H5F0S0G0	1159.02	4630.03	4	-3	16.4523	-4.8948	N-linked glycosylation
32865	32869	106.705	VSNQTLSLFFTVLQDVPVR	gi|578822814, gi|66932947	1768.64	N4H5F1S0G0	984.214	3931.83	4	-2	15.5365	1.6793	N-linked glycosylation
38260	38270	122.021	VSNQTLSLFFTVLQDVPVR	gi|578822814, gi|66932947	2350.79	N2H12F0S0G0	1129.76	4514.01	4	-2	15.3517	7.343	N-linked glycosylation
32943	32948	106.928	VSNQTLSLFFTVLQDVPVR	gi|578822814, gi|66932947	1622.58	N4H5F0S0G0	947.45	3785.77	4	-1	14.5508	2.9629	N-linked glycosylation
36921	36925	118.218	VSNQTLSLFFTVLQDVPVR	gi|578822814, gi|66932947	1913.68	N4H5F0S1G0	1020.47	4076.86	4	-2	14.5377	1.1045	N-linked glycosylation
36869	36870	118.062	VSNQTLSLFFTVLQDVPVR	gi|578822814, gi|66932947	2059.73	N4H5F1S1G0	1057.24	4222.92	4	-3	14.5171	-0.25761	N-linked glycosylation
36713	36716	117.627	VSNQTLSLFFTVLQDVPVR	gi|578822814, gi|66932947	2059.73	N4H5F1S1G0	1408.98	4222.92	3	-2	13.4745	1.6093	N-linked glycosylation
25104	25105	84.8113	SLGNVNFTVSAEALESQELCGTEVPSVPEHGR	gi|578822814, gi|66932947	1872.65	N3H6F0S1G0	1323.08	5286.28	4	-3	13.4341	0.31966	N-linked glycosylation
36921	36924	118.215	VSNQTLSLFFTVLQDVPVR	gi|578822814, gi|66932947	1913.68	N4H5F0S1G0	1359.63	4076.86	3	0	12.4661	0.68736	N-linked glycosylation
36674	36681	117.527	VSNQTLSLFFTVLQDVPVR	gi|578822814, gi|66932947	2059.73	N4H5F1S1G0	1056.99	4222.92	4	-2	12.425	1.115	N-linked glycosylation
22400	22405	77.2138	SLGNVNFTVSAEALESQELCGTEVPSVPEHGR	gi|578822814, gi|66932947	1216.42	N2H5F0S0G0	1158.77	4630.05	4	-2	12.3871	-1.2174	N-linked glycosylation
38260	38262	122	VSNQTLSLFFTVLQDVPVR	gi|578822814, gi|66932947	2715.96	N5H6F1S2G0	1221.04	4879.14	4	-2	12.3681	-1.3492	N-linked glycosylation
36739	36742	117.7	VSNQTLSLFFTVLQDVPVR	gi|578822814, gi|66932947	1913.68	N4H5F0S1G0	1020.72	4076.86	4	-3	11.4147	-0.19747	N-linked glycosylation
22595	22599	77.7567	SLGNVNFTVSAEALESQELCGTEVPSVPEHGR	gi|578822814, gi|66932947	1419.5	N3H5F0S0G0	1209.79	4833.14	4	-3	11.4135	2.4221	N-linked glycosylation
38260	38263	122.002	VSNQTLSLFFTVLQDVPVR	gi|578822814, gi|66932947	2204.77	N4H5F0S2G0	1457.32	4367.95	3	-2	11.3642	-1.2164	N-linked glycosylation
22283	22294	76.9032	SLGNVNFTVSAEALESQELCGTEVPSVPEHGR	gi|578822814, gi|66932947	1581.56	N3H6F0S0G0	1250.31	4995.2	4	-3	10.466	3.7966	N-linked glycosylation
22478	22480	77.4245	SLGNVNFTVSAEALESQELCGTEVPSVPEHGR	gi|578822814, gi|66932947	1581.56	N3H6F0S0G0	1250.05	4995.19	4	-2	10.4575	0.46046	N-linked glycosylation
22556	22559	77.6448	SLGNVNFTVSAEALESQELCGTEVPSVPEHGR	gi|578822814, gi|66932947	1378.48	N2H6F0S0G0	1199.29	4792.12	4	-2	10.3733	2.5801	N-linked glycosylation
33489	33498	108.488	GCVLLSYLNETVTVSASLESVR	gi|578822814, gi|66932947	1913.68	N4H5F0S1G0	1078.99	4310.92	4	-2	10.3444	1.6286	N-linked glycosylation
36492	36496	117.003	VSNQTLSLFFTVLQDVPVR	gi|578822814, gi|66932947	2278.81	N5H6F0S1G0	1112.01	4442	4	-3	9.3661	2.375	N-linked glycosylation
33528	33529	108.578	GCVLLSYLNETVTVSASLESVR	gi|578822814, gi|66932947	1913.68	N4H5F0S1G0	1438.31	4310.91	3	-2	9.359	0.38556	N-linked glycosylation
38273	38279	122.047	VSNQTLSLFFTVLQDVPVR	gi|578822814, gi|66932947	2350.79	N2H12F0S0G0	1506.01	4514.02	3	-2	9.3067	9.9418	N-linked glycosylation
23700	23702	80.86	SLGNVNFTVSAEALESQELCGTEVPSVPEHGR	gi|578822814, gi|66932947	1216.42	N2H5F0S0G0	1158.77	4630.06	4	-2	9.2671	0.89178	N-linked glycosylation
25299	25303	85.3665	SLGNVNFTVSAEALESQELCGTEVPSVPEHGR	gi|578822814, gi|66932947	1548.54	N3H4F0S1G0	1241.55	4962.18	4	-1	8.4144	1.3255	N-linked glycosylation
24883	24887	84.199	SLGNVNFTVSAEALESQELCGTEVPSVPEHGR	gi|578822814, gi|66932947	1913.68	N4H5F0S1G0	1066.67	5327.3	5	-2	8.3853	-0.19899	N-linked glycosylation
22673	22678	77.978	SLGNVNFTVSAEALESQELCGTEVPSVPEHGR	gi|578822814, gi|66932947	1581.56	N3H6F0S0G0	1250.3	4995.18	4	-3	7.3931	-0.79765	N-linked glycosylation
25052	25053	84.6652	SLGNVNFTVSAEALESQELCGTEVPSVPEHGR	gi|578822814, gi|66932947	1913.68	N4H5F0S1G0	1333.08	5327.31	4	-2	7.2887	0.53661	N-linked glycosylation
37233	37234	119.095	VSNQTLSLFFTVLQDVPVR	gi|578822814, gi|66932947	2059.73	N4H5F1S1G0	1056.99	4222.92	4	-2	7.2719	-0.041305	N-linked glycosylation
36895	36896	118.136	VSNQTLSLFFTVLQDVPVR	gi|578822814, gi|66932947	2059.73	N4H5F1S1G0	1408.65	4222.93	3	-1	7.2451	2.7218	N-linked glycosylation
36947	36951	118.291	VSNQTLSLFFTVLQDVPVR	gi|578822814, gi|66932947	1930.69	N4H6F1S0G0	1365.97	4093.9	3	-2	7.2404	5.8936	N-linked glycosylation
22439	22442	77.3177	SLGNVNFTVSAEALESQELCGTEVPSVPEHGR	gi|578822814, gi|66932947	1216.42	N2H5F0S0G0	1544.69	4630.04	3	-2	6.4754	-2.6911	N-linked glycosylation
36999	37003	118.439	VSNQTLSLFFTVLQDVPVR	gi|578822814, gi|66932947	2075.73	N4H6F0S1G0	1414.32	4238.93	3	-2	6.257	4.0447	N-linked glycosylation
37142	37152	118.86	VSNQTLSLFFTVLQDVPVR	gi|578822814, gi|66932947	1913.68	N4H5F0S1G0	1020.47	4076.86	4	-2	6.234	-0.45249	N-linked glycosylation
36726	36734	117.677	VSNQTLSLFFTVLQDVPVR	gi|578822814, gi|66932947	1913.68	N4H5F0S1G0	1360.3	4076.87	3	-2	6.1832	2.6945	N-linked glycosylation
38195	38204	121.838	GCVLLSYLNETVTVSASLESVR	gi|578822814, gi|66932947	2352.87	N4H5F5S0G0	1584.36	4750.07	3	-1	6.1559	-7.8115	N-linked glycosylation
23193	23195	79.4348	SLGNVNFTVSAEALESQELCGTEVPSVPEHGR	gi|578822814, gi|66932947	1216.42	N2H5F0S0G0	1545.35	4630.03	3	-4	5.4889	-5.5112	N-linked glycosylation
22816	22818	78.374	SLGNVNFTVSAEALESQELCGTEVPSVPEHGR	gi|578822814, gi|66932947	1216.42	N2H5F0S0G0	1544.35	4630.04	3	-1	5.466	-3.4166	N-linked glycosylation
22400	22407	77.219	SLGNVNFTVSAEALESQELCGTEVPSVPEHGR	gi|578822814, gi|66932947	1419.5	N3H5F0S0G0	1209.79	4833.15	4	-3	5.3858	3.0282	N-linked glycosylation
24064	24066	81.8853	SLGNVNFTVSAEALESQELCGTEVPSVPEHGR	gi|578822814, gi|66932947	1216.42	N2H5F0S0G0	1158.77	4630.06	4	-2	5.2672	2.79	N-linked glycosylation
37142	37145	118.841	VSNQTLSLFFTVLQDVPVR	gi|578822814, gi|66932947	2059.73	N4H5F1S1G0	1409.31	4222.91	3	-3	5.2587	-1.5843	N-linked glycosylation
29654	29658	97.6348	GCVLLSYLNETVTVSASLESVR	gi|578822814, gi|66932947	1622.58	N4H5F0S0G0	1341.61	4019.81	3	-3	5.2194	-2.2578	N-linked glycosylation
37818	37822	120.763	GCVLLSYLNETVTVSASLESVR	gi|578822814, gi|66932947	1913.68	N4H5F0S1G0	1438.98	4310.92	3	-4	5.1879	1.9439	N-linked glycosylation
29472	29483	97.1405	GCVLLSYLNETVTVSASLESVR	gi|578822814, gi|66932947	1768.64	N4H5F1S0G0	1042.98	4165.88	4	-3	5.1771	1.3254	N-linked glycosylation
34152	34162	110.377	YTGNASALFILPDQDK	gi|50659080	3226.13	N6H7F0S3G0	1246.01	4979.01	4	-2	6.2109	-0.34577	N-linked glycosylation
25078	25081	84.7437	FNLTETSEAEIHQSFQHLLR	gi|50659080	2204.77	N4H5F0S2G0	1153	4604.98	4	-4	6.1625	2.1865	N-linked glycosylation
22686	22691	78.0145	YTGNASALFILPDQDK	gi|50659080	2278.81	N5H6F0S1G0	1009.18	4031.68	4	-2	5.2782	-1.6376	N-linked glycosylation
20827	20828	72.7865	QQQHLFGSNVTDCSGNFCLFR	gi|4557871, gi|767927446	1913.68	N4H5F0S1G0	1108.46	4428.8	4	-2	14.199	-0.073828	N-linked glycosylation
24493	24494	83.0918	QQQHLFGSNVTDCSGNFCLFR	gi|4557871, gi|767927446	2204.77	N4H5F0S2G0	1180.73	4719.89	4	0	10.1858	-0.65251	N-linked glycosylation
18955	18956	67.5185	CGLVPVLAENYNK	gi|4557871, gi|767927446	1913.68	N4H5F0S1G0	1130.81	3390.43	3	0	7.3885	-0.078603	N-linked glycosylation
20853	20854	72.8595	QQQHLFGSNVTDCSGNFCLFR	gi|4557871, gi|767927446	1913.68	N4H5F0S1G0	1476.94	4428.8	3	0	7.1718	0.14856	N-linked glycosylation
18851	18863	67.255	CGLVPVLAENYNK	gi|4557871, gi|767927446	1913.68	N4H5F0S1G0	848.613	3390.42	4	-1	6.3842	-1.6119	N-linked glycosylation
23895	23903	81.4237	CGLVPVLAENYNK	gi|4557871, gi|767927446	2204.77	N4H5F0S2G0	921.388	3681.53	4	-1	6.3419	0.65369	N-linked glycosylation
14795	14798	55.8267	CGLVPVLAENYNK	gi|4557871, gi|767927446	1622.58	N4H5F0S0G0	1034.45	3099.34	3	-2	5.3915	0.48713	N-linked glycosylation
23895	23898	81.4107	CGLVPVLAENYNK	gi|4557871, gi|767927446	2204.77	N4H5F0S2G0	1228.18	3681.52	3	-1	5.3044	-1.0008	N-linked glycosylation
10674	10675	44.2297	ELHHLQEQNVSNAFLDK	gi|4557485, gi|578807061, gi|578807063, gi|578807065, gi|578807068, gi|767925751	1913.68	N4H5F0S1G0	984.928	3935.69	4	-1	19.3075	1.2885	N-linked glycosylation
13248	13249	51.467	ELHHLQEQNVSNAFLDK	gi|4557485, gi|578807061, gi|578807063, gi|578807065, gi|578807068, gi|767925751	2204.77	N4H5F0S2G0	1057.95	4226.78	4	-2	19.2724	-0.21533	N-linked glycosylation
8296	8297	37.5333	ELHHLQEQNVSNAFLDK	gi|4557485, gi|578807061, gi|578807063, gi|578807065, gi|578807068, gi|767925751	1622.58	N4H5F0S0G0	912.154	3644.59	4	-1	16.356	0.43744	N-linked glycosylation
13092	13093	51.0275	ELHHLQEQNVSNAFLDK	gi|4557485, gi|578807061, gi|578807063, gi|578807065, gi|578807068, gi|767925751	2569.9	N5H6F0S2G0	1149.24	4591.91	4	-2	14.2541	0.36052	N-linked glycosylation
10414	10415	43.4985	ELHHLQEQNVSNAFLDK	gi|4557485, gi|578807061, gi|578807063, gi|578807065, gi|578807068, gi|767925751	2278.81	N5H6F0S1G0	1075.96	4300.81	4	0	12.2968	-0.85024	N-linked glycosylation
25377	25380	85.5837	ENLTAPGSDSAVFFEQGTTR	gi|4557485, gi|578807061, gi|578807063, gi|578807065, gi|578807068, gi|767925751	2204.77	N4H5F0S2G0	1084.2	4331.77	4	-2	11.3836	0.72494	N-linked glycosylation
20931	20933	73.0823	ENLTAPGSDSAVFFEQGTTR	gi|4557485, gi|578807061, gi|578807063, gi|578807065, gi|578807068, gi|767925751	1913.68	N4H5F0S1G0	1011.42	4040.66	4	-2	11.3611	-3.5273	N-linked glycosylation
16095	16096	59.4803	ELHHLQEQNVSNAFLDK	gi|4557485, gi|578807061, gi|578807063, gi|578807065, gi|578807068, gi|767925751	2861	N5H6F0S3G0	1222.01	4883.01	4	-2	11.2305	0.70109	N-linked glycosylation
25572	25573	86.1277	ENLTAPGSDSAVFFEQGTTR	gi|4557485, gi|578807061, gi|578807063, gi|578807065, gi|578807068, gi|767925751	2204.77	N4H5F0S2G0	1084.2	4331.77	4	-2	10.3832	0.38678	N-linked glycosylation
12962	12964	50.6643	ELHHLQEQNVSNAFLDK	gi|4557485, gi|578807061, gi|578807063, gi|578807065, gi|578807068, gi|767925751	2715.96	N5H6F1S2G0	1185.75	4737.97	4	-2	10.2554	1.1142	N-linked glycosylation
13313	13316	51.6552	EHEGAIYPDNTTDFQR	gi|4557485, gi|578807061, gi|578807063, gi|578807065, gi|578807068, gi|767925751	2204.77	N4H5F0S2G0	1025.66	4097.61	4	-2	10.2424	-0.0089129	N-linked glycosylation
10050	10053	42.481	EHEGAIYPDNTTDFQR	gi|4557485, gi|578807061, gi|578807063, gi|578807065, gi|578807068, gi|767925751	1913.68	N4H5F0S1G0	1269.84	3806.52	3	-1	9.3051	-0.77596	N-linked glycosylation
10388	10391	43.4312	ELHHLQEQNVSNAFLDK	gi|4557485, gi|578807061, gi|578807063, gi|578807065, gi|578807068, gi|767925751	2059.73	N4H5F1S1G0	1021.44	4081.74	4	-1	9.2877	1.233	N-linked glycosylation
31123	31126	101.78	ENLTAPGSDSAVFFEQGTTR	gi|4557485, gi|578807061, gi|578807063, gi|578807065, gi|578807068, gi|767925751	3007.06	N5H6F1S3G0	1285.02	5134.05	4	-3	9.2493	-0.9647	N-linked glycosylation
20736	20745	72.5512	ENLTAPGSDSAVFFEQGTTR	gi|4557485, gi|578807061, gi|578807063, gi|578807065, gi|578807068, gi|767925751	1913.68	N4H5F0S1G0	1011.42	4040.65	4	-2	8.3992	-5.5212	N-linked glycosylation
10102	10103	42.6218	EHEGAIYPDNTTDFQR	gi|4557485, gi|578807061, gi|578807063, gi|578807065, gi|578807068, gi|767925751	2059.73	N4H5F1S1G0	1318.53	3952.58	3	-1	8.385	0.87976	N-linked glycosylation
25390	25393	85.6202	ENLTAPGSDSAVFFEQGTTR	gi|4557485, gi|578807061, gi|578807063, gi|578807065, gi|578807068, gi|767925751	2204.77	N4H5F0S2G0	1445.26	4331.77	3	-2	8.3251	-1.1602	N-linked glycosylation
7607	7609	35.5947	EHEGAIYPDNTTDFQR	gi|4557485, gi|578807061, gi|578807063, gi|578807065, gi|578807068, gi|767925751	1622.58	N4H5F0S0G0	1173.15	3515.43	3	-2	8.3216	1.3139	N-linked glycosylation
10245	10246	43.0245	EHEGAIYPDNTTDFQR	gi|4557485, gi|578807061, gi|578807063, gi|578807065, gi|578807068, gi|767925751	1913.68	N4H5F0S1G0	1269.85	3806.52	3	-1	8.3119	0.57092	N-linked glycosylation
10219	10220	42.9513	EHEGAIYPDNTTDFQR	gi|4557485, gi|578807061, gi|578807063, gi|578807065, gi|578807068, gi|767925751	1913.68	N4H5F0S1G0	952.887	3806.52	4	-2	8.2833	0.039047	N-linked glycosylation
13430	13431	51.979	ELHHLQEQNVSNAFLDK	gi|4557485, gi|578807061, gi|578807063, gi|578807065, gi|578807068, gi|767925751	2204.77	N4H5F0S2G0	1057.95	4226.78	4	-2	8.2708	0.70884	N-linked glycosylation
13313	13315	51.6525	EHEGAIYPDNTTDFQR	gi|4557485, gi|578807061, gi|578807063, gi|578807065, gi|578807068, gi|767925751	2204.77	N4H5F0S2G0	1367.21	4097.61	3	-2	8.2609	0.1431	N-linked glycosylation
13495	13498	52.1673	EHEGAIYPDNTTDFQR	gi|4557485, gi|578807061, gi|578807063, gi|578807065, gi|578807068, gi|767925751	2204.77	N4H5F0S2G0	1367.21	4097.61	3	-2	8.2433	-1.555	N-linked glycosylation
10583	10585	43.9765	ELHHLQEQNVSNAFLDK	gi|4557485, gi|578807061, gi|578807063, gi|578807065, gi|578807068, gi|767925751	2059.73	N4H5F1S1G0	1021.19	4081.74	4	0	8.2278	1.0979	N-linked glycosylation
12975	12981	50.7117	EHEGAIYPDNTTDFQR	gi|4557485, gi|578807061, gi|578807063, gi|578807065, gi|578807068, gi|767925751	2715.96	N5H6F1S2G0	1537.6	4608.78	3	-2	7.2033	-5.2574	N-linked glycosylation
13079	13082	50.9958	EHEGAIYPDNTTDFQR	gi|4557485, gi|578807061, gi|578807063, gi|578807065, gi|578807068, gi|767925751	2569.9	N5H6F0S2G0	1116.94	4462.72	4	-2	7.1911	-5.7792	N-linked glycosylation
12325	12326	48.8718	ELHHLQEQNVSNAFLDK	gi|4557485, gi|578807061, gi|578807063, gi|578807065, gi|578807068, gi|767925751	2204.77	N4H5F0S2G0	1058.2	4226.75	4	-3	7.1674	-5.5144	N-linked glycosylation
13092	13098	51.0407	EHEGAIYPDNTTDFQR	gi|4557485, gi|578807061, gi|578807063, gi|578807065, gi|578807068, gi|767925751	2569.9	N5H6F0S2G0	1489.25	4462.73	3	-3	7.1529	-3.6561	N-linked glycosylation
12949	12954	50.6357	EHEGAIYPDNTTDFQR	gi|4557485, gi|578807061, gi|578807063, gi|578807065, gi|578807068, gi|767925751	2350.79	N2H12F0S0G0	1061.92	4243.64	4	-1	7.1335	2.1673	N-linked glycosylation
20931	20932	73.0797	ENLTAPGSDSAVFFEQGTTR	gi|4557485, gi|578807061, gi|578807063, gi|578807065, gi|578807068, gi|767925751	1913.68	N4H5F0S1G0	1348.23	4040.67	3	-2	6.3818	-2.0137	N-linked glycosylation
10570	10573	43.9425	ELHHLQEQNVSNAFLDK	gi|4557485, gi|578807061, gi|578807063, gi|578807065, gi|578807068, gi|767925751	1913.68	N4H5F0S1G0	1312.9	3935.68	3	-1	6.2377	0.64037	N-linked glycosylation
13105	13106	51.0642	ELHHLQEQNVSNAFLDK	gi|4557485, gi|578807061, gi|578807063, gi|578807065, gi|578807068, gi|767925751	2350.79	N2H12F0S0G0	1094.71	4372.83	4	-3	6.1722	6.6222	N-linked glycosylation
10024	10036	42.4313	EHEGAIYPDNTTDFQR	gi|4557485, gi|578807061, gi|578807063, gi|578807065, gi|578807068, gi|767925751	1913.68	N4H5F0S1G0	952.638	3806.52	4	-1	6.1107	1.3694	N-linked glycosylation
20736	20739	72.5353	ENLTAPGSDSAVFFEQGTTR	gi|4557485, gi|578807061, gi|578807063, gi|578807065, gi|578807068, gi|767925751	1913.68	N4H5F0S1G0	1347.9	4040.67	3	-1	5.3273	-1.9387	N-linked glycosylation
10427	10428	43.5353	ELHHLQEQNVSNAFLDK	gi|4557485, gi|578807061, gi|578807063, gi|578807065, gi|578807068, gi|767925751	2424.87	N5H6F1S1G0	1112.98	4446.87	4	-2	5.2551	0.020909	N-linked glycosylation
25286	25290	85.33	ENLTAPGSDSAVFFEQGTTR	gi|4557485, gi|578807061, gi|578807063, gi|578807065, gi|578807068, gi|767925751	2350.79	N2H12F0S0G0	1120.72	4477.83	4	-2	5.2085	8.9931	N-linked glycosylation
10284	10288	43.1422	EHEGAIYPDNTTDFQR	gi|4557485, gi|578807061, gi|578807063, gi|578807065, gi|578807068, gi|767925751	2059.73	N4H5F1S1G0	1318.87	3952.58	3	-2	5.1987	0.15453	N-linked glycosylation
7477	7486	35.2465	EHEGAIYPDNTTDFQR	gi|4557485, gi|578807061, gi|578807063, gi|578807065, gi|578807068, gi|767925751	1622.58	N4H5F0S0G0	880.113	3515.42	4	-2	5.1979	-0.66898	N-linked glycosylation
10115	10117	42.6608	EHEGAIYPDNTTDFQR	gi|4557485, gi|578807061, gi|578807063, gi|578807065, gi|578807068, gi|767925751	2059.73	N4H5F1S1G0	989.402	3952.58	4	-2	5.1797	0.33666	N-linked glycosylation
15926	15929	59.0098	ELHHLQEQNVSNAFLDK	gi|4557485, gi|578807061, gi|578807063, gi|578807065, gi|578807068, gi|767925751	3007.06	N5H6F1S3G0	1258.77	5029.06	4	-3	5.1778	-0.62514	N-linked glycosylation
13118	13121	51.1063	EHEGAIYPDNTTDFQR	gi|4557485, gi|578807061, gi|578807063, gi|578807065, gi|578807068, gi|767925751	2204.77	N4H5F0S2G0	1025.66	4097.61	4	-2	5.1729	-0.84305	N-linked glycosylation
25130	25135	84.8952	ENLTAPGSDSAVFFEQGTTR	gi|4557485, gi|578807061, gi|578807063, gi|578807065, gi|578807068, gi|767925751	2715.96	N5H6F1S2G0	1212.25	4842.97	4	-3	5.1642	0.93118	N-linked glycosylation
12949	12955	50.6383	EHEGAIYPDNTTDFQR	gi|4557485, gi|578807061, gi|578807063, gi|578807065, gi|578807068, gi|767925751	2350.79	N2H12F0S0G0	1415.56	4243.67	3	-1	5.1429	7.722	N-linked glycosylation
33567	33576	108.71	DVQIIVFPEDGIHGFNFTR	gi|4557373, gi|528524481, gi|528524483, gi|528524486, gi|528524488, gi|578806517, gi|767924112	2204.77	N4H5F0S2G0	1103.48	4408.88	4	-2	7.2803	-1.5753	N-linked glycosylation
29550	29552	97.3363	FSEFWDLDPEVRPTSAVAA	gi|4557323	656.228	N1H1F0S1G0	931.757	2793.26	3	0	16.3698	1.2223	O-linked glycosylation
34594	34597	111.618	FSEFWDLDPEVRPTSAVAA	gi|4557323	947.323	N1H1F0S2G0	1028.79	3084.35	3	0	13.3127	0.33453	O-linked glycosylation
24961	24969	84.4282	FSEFWDLDPEVRPTSAVAA	gi|4557323	365.132	N1H1F0S0G0	835.391	2502.15	3	-2	11.4125	-1.6577	O-linked glycosylation
29368	29370	96.8238	FSEFWDLDPEVRPTSAVAA	gi|4557323	656.228	N1H1F0S1G0	931.758	2793.26	3	0	10.3528	2.4023	O-linked glycosylation
29173	29184	96.2987	FSEFWDLDPEVRPTSAVAA	gi|4557323	656.228	N1H1F0S1G0	931.756	2793.25	3	0	9.258	-0.15429	O-linked glycosylation
9322	9325	40.4283	PEVRPTSAVAA	gi|4557323	947.323	N1H1F0S2G0	682.312	2044.92	3	0	8.5417	1.2811	O-linked glycosylation
34776	34778	112.133	FSEFWDLDPEVRPTSAVAA	gi|4557323	947.323	N1H1F0S2G0	1028.79	3084.34	3	0	8.2908	-2.1588	O-linked glycosylation
24974	24977	84.452	FSEFWDLDPEVRPTSAVAA	gi|4557323	365.132	N1H1F0S0G0	1251.58	2502.16	2	0	7.4221	0.32145	O-linked glycosylation
5852	5863	30.689	PEVRPTSAVAA	gi|4557323	656.228	N1H1F0S1G0	585.279	1753.82	3	0	6.5216	-1.2196	O-linked glycosylation
22608	22613	77.7958	IPSCDSSPVSTEQLAPTAPPELTPVVQDCYHGDGQSYR	gi|4505881	656.228	N1H1F0S1G0	1205.05	4815.15	4	-2	11.2292	4.1386	O-linked glycosylation
24181	24182	82.2118	VIDFNCTTSSVSSALANTK	gi|4504489, gi|530374534	2204.77	N4H5F0S2G0	1056.2	4219.75	4	-2	15.2924	0.74028	N-linked glycosylation
24181	24183	82.2145	VIDFNCTTSSVSSALANTK	gi|4504489, gi|530374534	2204.77	N4H5F0S2G0	1407.92	4219.75	3	-2	9.2134	-0.15353	N-linked glycosylation
20099	20102	70.7422	VIDFNCTTSSVSSALANTK	gi|4504489, gi|530374534	1913.68	N4H5F0S1G0	982.922	3928.66	4	0	8.3029	2.5501	N-linked glycosylation
16862	16866	61.647	VIDFNCTTSSVSSALANTK	gi|4504489, gi|530374534	1622.58	N4H5F0S0G0	1213.53	3637.56	3	-1	6.1592	1.1144	N-linked glycosylation
9374	9375	40.57	YPHKPEINSTTHPGADLQENFCR	gi|4503635	1913.68	N4H5F0S1G0	926.197	4624.95	5	-2	16.2217	1.0703	N-linked glycosylation
11181	11183	45.6575	YPHKPEINSTTHPGADLQENFCR	gi|4503635	2204.77	N4H5F0S2G0	984.417	4916.05	5	-2	13.1992	2.3474	N-linked glycosylation
9556	9557	41.0808	YPHKPEINSTTHPGADLQENFCR	gi|4503635	1913.68	N4H5F0S1G0	925.794	4624.94	5	0	12.2175	0.053276	N-linked glycosylation
10986	10989	45.1122	YPHKPEINSTTHPGADLQENFCR	gi|4503635	2204.77	N4H5F0S2G0	984.014	4916.04	5	0	12.2106	0.024873	N-linked glycosylation
11168	11170	45.6215	YPHKPEINSTTHPGADLQENFCR	gi|4503635	2204.77	N4H5F0S2G0	1230.52	4916.03	4	-3	10.2303	-0.34376	N-linked glycosylation
7893	7894	36.3968	YPHKPEINSTTHPGADLQENFCR	gi|4503635	1622.58	N4H5F0S0G0	867.975	4333.84	5	-2	10.2235	-1.4345	N-linked glycosylation
9400	9401	40.6428	YPHKPEINSTTHPGADLQENFCR	gi|4503635	1913.68	N4H5F0S1G0	1157.49	4624.94	4	-2	8.2663	0.083286	N-linked glycosylation
9738	9739	41.5935	YPHKPEINSTTHPGADLQENFCR	gi|4503635	1913.68	N4H5F0S1G0	925.793	4624.94	5	0	8.2336	-1.1345	N-linked glycosylation
11363	11365	46.1697	YPHKPEINSTTHPGADLQENFCR	gi|4503635	2204.77	N4H5F0S2G0	984.414	4916.03	5	-2	8.172	-1.0048	N-linked glycosylation
16927	16937	61.8452	NFTENDLLVR	gi|4503635	1913.68	N4H5F0S1G0	1046.11	3134.31	3	-2	6.3179	1.4474	N-linked glycosylation
9582	9584	41.1568	YPHKPEINSTTHPGADLQENFCR	gi|4503635	1913.68	N4H5F0S1G0	1156.99	4624.94	4	0	6.271	-1.1053	N-linked glycosylation
9179	9189	40.0472	YPHKPEINSTTHPGADLQENFCR	gi|4503635	1913.68	N4H5F0S1G0	926.197	4624.95	5	-2	6.2531	1.0703	N-linked glycosylation
16706	16707	61.2013	NFTENDLLVR	gi|4503635	1913.68	N4H5F0S1G0	1045.78	3134.31	3	-1	5.4023	0.72617	N-linked glycosylation
12507	12510	49.3883	NFTENDLLVR	gi|4503635	1622.58	N4H5F0S0G0	949.077	2843.21	3	-2	5.308	0.17943	N-linked glycosylation
9920	9921	42.1085	YPHKPEINSTTHPGADLQENFCR	gi|4503635	1913.68	N4H5F0S1G0	925.794	4624.94	5	0	5.2325	-0.14468	N-linked glycosylation
38286	38292	122.083	AVNITSENLIDDVVSLIR	gi|4502511	2204.77	N4H5F0S2G0	1044.97	4175.85	4	-1	17.4386	-0.69808	N-linked glycosylation
37428	37429	119.649	AVNITSENLIDDVVSLIR	gi|4502511	1913.68	N4H5F0S1G0	1295.92	3884.75	3	-1	12.384	-0.19673	N-linked glycosylation
37259	37269	119.192	AVNITSENLIDDVVSLIR	gi|4502511	1913.68	N4H5F0S1G0	972.445	3884.75	4	-2	11.3794	-0.56078	N-linked glycosylation
31318	31320	102.33	LGACNDTLQQLMEVFK	gi|4502261, gi|530364787	2204.77	N4H5F0S2G0	1023.18	4087.68	4	-2	11.3036	1.4705	N-linked glycosylation
31136	31140	101.819	LGACNDTLQQLMEVFK	gi|4502261, gi|530364787	2204.77	N4H5F0S2G0	1022.92	4087.67	4	-1	9.2107	-0.87429	N-linked glycosylation
32332	32337	105.201	SLTFNETYQDISELVYGAK	gi|4502261, gi|530364787	1913.68	N4H5F0S1G0	1365.25	4091.73	3	-2	9.1689	-2.179	N-linked glycosylation
32176	32184	104.768	SLTFNETYQDISELVYGAK	gi|4502261, gi|530364787	1913.68	N4H5F0S1G0	1024.19	4091.74	4	-2	8.2209	-0.66054	N-linked glycosylation
32137	32140	104.646	SLTFNETYQDISELVYGAK	gi|4502261, gi|530364787	1913.68	N4H5F0S1G0	1365.59	4091.75	3	-3	8.1483	2.401	N-linked glycosylation
36856	36859	118.031	SLTFNETYQDISELVYGAK	gi|4502261, gi|530364787	2204.77	N4H5F0S2G0	1096.97	4382.85	4	-2	7.1587	3.686	N-linked glycosylation
36843	36844	117.989	SLTFNETYQDISELVYGAK	gi|4502261, gi|530364787	2204.77	N4H5F0S2G0	1462.29	4382.83	3	-2	5.1516	0.43017	N-linked glycosylation
17850	17853	64.424	ADGTVNQIEGEATPVNLTEPAK	gi|4502163	2059.73	N4H5F1S1G0	1079.47	4313.86	4	-1	10.1451	0.5222	N-linked glycosylation
17863	17864	64.4558	ADGTVNQIEGEATPVNLTEPAK	gi|4502163	2059.73	N4H5F1S1G0	1439.29	4313.85	3	-2	8.1664	-0.28088	N-linked glycosylation
18006	18007	64.8575	ADGTVNQIEGEATPVNLTEPAK	gi|4502163	1913.68	N4H5F0S1G0	1390.61	4167.8	3	-2	6.1118	0.18718	N-linked glycosylation
36726	36738	117.687	VTQNLTLIEESLTSEFIHDIDR	gi|39725934	2204.77	N4H5F0S2G0	1196.03	4778.09	4	-3	8.1912	1.8182	N-linked glycosylation
18838	18842	67.1978	GLTFQQNASSMCVPDQDTAIR	gi|38635953	2262.81	N5H5F1S1G0	1151.48	4601.89	4	-1	6.3907	-0.030898	N-linked glycosylation
15718	15719	58.4192	GLTFQQNASSMCVPDQDTAIR	gi|38635953	2262.81	N5H5F1S1G0	1155.73	4617.88	4	-2	6.3712	-0.078991	N-linked glycosylation
15783	15793	58.626	GLTFQQNASSMCVPDQDTAIR	gi|38635953	1971.72	N5H5F1S0G0	1079.21	4310.79	4	-3	6.3243	-1.5465	N-linked glycosylation
15575	15578	58.023	GLTFQQNASSMCVPDQDTAIR	gi|38635953	2279.83	N5H6F2S0G0	1159.98	4634.9	4	-2	6.3005	0.83421	N-linked glycosylation
18877	18885	67.3173	GLTFQQNASSMCVPDQDTAIR	gi|38635953	2043.74	N4H4F2S1G0	1467.61	4398.8	3	-2	5.3397	-1.5046	N-linked glycosylation
18864	18876	67.2915	GLTFQQNASSMCVPDQDTAIR	gi|38635953	2059.73	N4H5F1S1G0	1100.71	4398.81	4	-1	5.3235	0.14652	N-linked glycosylation
13586	13591	52.4288	GLTFQQNASSMCGPDQDTAIR	gi|38635953	2262.81	N5H5F1S1G0	1145.47	4575.84	4	-3	5.1413	0.16389	N-linked glycosylation
13287	13290	51.5818	GLTFQQNASSMCGPDQDTAIR	gi|38635953	1954.7	N5H4F0S1G0	1068.19	4267.74	4	-2	5.1284	3.4461	N-linked glycosylation
21217	21219	73.8875	LANLTQGEDQYYLR	gi|355594753, gi|578815184	2204.77	N4H5F0S2G0	973.41	3888.61	4	-2	14.3889	0.72981	N-linked glycosylation
21204	21207	73.8537	LANLTQGEDQYYLR	gi|355594753, gi|578815184	2204.77	N4H5F0S2G0	1297.21	3888.61	3	-1	10.359	0.057571	N-linked glycosylation
35088	35093	113.03	MLNTSSLLEQLNEQFNWVSR	gi|355594753, gi|578815184	1913.68	N4H5F0S1G0	1085.97	4338.86	4	-2	10.3242	0.8526	N-linked glycosylation
34906	34911	112.511	MLNTSSLLEQLNEQFNWVSR	gi|355594753, gi|578815184	2278.81	N5H6F0S1G0	1177.25	4703.98	4	-2	8.1212	-1.7822	N-linked glycosylation
38247	38255	121.979	MLNTSSLLEQLNEQFNWVSR	gi|355594753, gi|578815184	2204.77	N4H5F0S2G0	1154.99	4613.93	4	-3	8.1075	-6.7823	N-linked glycosylation
16875	16879	61.6838	LANLTQGEDQYYLR	gi|355594753, gi|578815184	1913.68	N4H5F0S1G0	900.386	3597.52	4	-1	6.4287	1.2978	N-linked glycosylation
17031	17032	62.115	LANLTQGEDQYYLR	gi|355594753, gi|578815184	1913.68	N4H5F0S1G0	1200.18	3597.52	3	-1	5.3829	2.5568	N-linked glycosylation
26612	26615	89.0638	LANLTQGEDQYYLR	gi|355594753, gi|578815184	2861	N5H6F0S3G0	1137.22	4544.84	4	-1	5.2496	0.91944	N-linked glycosylation
14301	14303	54.433	TMVFPVMYLNESVHIDK	gi|323714253, gi|5031631	2204.77	N4H5F0S2G0	1058.2	4227.77	4	-2	6.2184	-2.3575	N-linked glycosylation
14119	14120	53.9188	TMVFPVMYLNESVHIDK	gi|323714253, gi|5031631	2204.77	N4H5F0S2G0	1057.7	4227.77	4	0	5.2133	-1.3479	N-linked glycosylation
12338	12339	48.9082	HYTNPSQDVTVPCPVPSTPPTPSPSTPPTPSPSCCHPR	gi|31615935	1298.48	N4H3F0S0G0	1360.35	5435.36	4	-3	17.2287	-0.64579	O-linked glycosylation
12013	12014	47.9948	HYTNPSQDVTVPCPVPSTPPTPSPSTPPTPSPSCCHPR	gi|31615935	1460.53	N4H4F0S0G0	1400.86	5597.42	4	-3	17.2232	-0.55159	O-linked glycosylation
13352	13353	51.7597	HYTNPSQDVTVPCPVPSTPPTPSPSTPPTPSPSCCHPR	gi|31615935	1751.62	N4H4F0S1G0	1179.11	5888.52	5	-3	16.1906	0.10548	O-linked glycosylation
15211	15212	56.993	HYTNPSQDVTVPCPVPSTPPTPSPSTPPTPSPSCCHPR	gi|31615935	2042.72	N4H4F0S2G0	1237.33	6179.61	5	-3	16.1748	0.22857	O-linked glycosylation
15198	15199	56.9565	HYTNPSQDVTVPCPVPSTPPTPSPSTPPTPSPSCCHPR	gi|31615935	2042.72	N4H4F0S2G0	1546.41	6179.61	4	-3	14.2458	-0.71758	O-linked glycosylation
11974	11975	47.8855	HYTNPSQDVTVPCPVPSTPPTPSPSTPPTPSPSCCHPR	gi|31615935	1501.56	N5H3F0S0G0	1411.12	5638.44	4	-3	14.235	-1.5414	O-linked glycosylation
12026	12027	48.0317	HYTNPSQDVTVPCPVPSTPPTPSPSTPPTPSPSCCHPR	gi|31615935	1460.53	N4H4F0S0G0	1120.29	5597.42	5	0	14.1987	-0.064263	O-linked glycosylation
15601	15605	58.0983	HYTNPSQDVTVPCPVPSTPPTPSPSTPPTPSPSCCHPR	gi|31615935	1677.59	N3H3F0S2G0	1455.12	5814.46	4	-3	13.2662	-2.5475	O-linked glycosylation
12520	12523	49.4248	HYTNPSQDVTVPCPVPSTPPTPSPSTPPTPSPSCCHPR	gi|31615935	1298.48	N4H3F0S0G0	1360.35	5435.36	4	-3	13.2453	-0.64579	O-linked glycosylation
13768	13769	52.9295	HYTNPSQDVTVPCPVPSTPPTPSPSTPPTPSPSCCHPR	gi|31615935	1589.57	N4H3F0S1G0	1433.12	5726.46	4	-3	13.2284	-0.73057	O-linked glycosylation
14093	14094	53.8457	HYTNPSQDVTVPCPVPSTPPTPSPSTPPTPSPSCCHPR	gi|31615935	1751.62	N4H4F0S1G0	1179.11	5888.5	5	-3	13.2001	-3.2114	O-linked glycosylation
13885	13887	53.2613	HYTNPSQDVTVPCPVPSTPPTPSPSTPPTPSPSCCHPR	gi|31615935	1589.57	N4H3F0S1G0	1146.7	5726.46	5	-3	13.1898	-0.071932	O-linked glycosylation
15393	15394	57.5057	HYTNPSQDVTVPCPVPSTPPTPSPSTPPTPSPSCCHPR	gi|31615935	2042.72	N4H4F0S2G0	1237.53	6179.6	5	-4	13.1772	-1.3415	O-linked glycosylation
14223	14225	54.214	HYTNPSQDVTVPCPVPSTPPTPSPSTPPTPSPSCCHPR	gi|31615935	1224.44	N3H2F0S1G0	1341.59	5361.33	4	-2	12.2234	-0.63312	O-linked glycosylation
12117	12125	48.3052	HYTNPSQDVTVPCPVPSTPPTPSPSTPPTPSPSCCHPR	gi|31615935	1095.4	N3H3F0S0G0	1047.66	5232.28	5	-2	12.1982	-1.3748	O-linked glycosylation
13729	13731	52.8225	HYTNPSQDVTVPCPVPSTPPTPSPSTPPTPSPSCCHPR	gi|31615935	1386.49	N3H3F0S1G0	1382.35	5523.38	4	-3	11.2272	-1.3222	O-linked glycosylation
14509	14511	55.0188	HYTNPSQDVTVPCPVPSTPPTPSPSTPPTPSPSCCHPR	gi|31615935	1590.59	N4H3F2S0G0	1433.37	5727.45	4	-3	11.225	-6.4235	O-linked glycosylation
14132	14133	53.9552	HYTNPSQDVTVPCPVPSTPPTPSPSTPPTPSPSCCHPR	gi|31615935	1589.57	N4H3F0S1G0	1433.37	5726.45	4	-4	11.2088	-1.828	O-linked glycosylation
15016	15017	56.4438	HYTNPSQDVTVPCPVPSTPPTPSPSTPPTPSPSCCHPR	gi|31615935	2042.72	N4H4F0S2G0	1546.41	6179.6	4	-3	11.2064	-0.87561	O-linked glycosylation
11389	11390	46.24	HYTNPSQDVTVPCPVPSTPPTPSPSTPPTPSPSCCHPR	gi|31615935	1825.66	N5H5F0S0G0	1194.12	5962.55	5	-4	11.1808	-0.28376	O-linked glycosylation
13261	13269	51.5217	HYTNPSQDVTVPCPVPSTPPTPSPSTPPTPSPSCCHPR	gi|31615935	1751.62	N4H4F0S1G0	982.763	5888.53	6	-3	11.1424	2.0313	O-linked glycosylation
14054	14055	53.735	HYTNPSQDVTVPCPVPSTPPTPSPSTPPTPSPSCCHPR	gi|31615935	1751.62	N4H4F0S1G0	1473.88	5888.49	4	-4	10.2304	-3.779	O-linked glycosylation
13508	13509	52.1992	HYTNPSQDVTVPCPVPSTPPTPSPSTPPTPSPSCCHPR	gi|31615935	1751.62	N4H4F0S1G0	1473.64	5888.52	4	-3	10.2275	0.1076	O-linked glycosylation
14886	14894	56.096	HYTNPSQDVTVPCPVPSTPPTPSPSTPPTPSPSCCHPR	gi|31615935	2083.75	N5H3F0S2G0	1244.93	6220.62	5	0	10.1988	-2.5488	O-linked glycosylation
12377	12381	49.0252	HYTNPSQDVTVPCPVPSTPPTPSPSTPPTPSPSCCHPR	gi|31615935	1298.48	N4H3F0S0G0	1088.28	5435.37	5	-2	10.193	-0.233	O-linked glycosylation
15146	15149	56.8152	HYTNPSQDVTVPCPVPSTPPTPSPSTPPTPSPSCCHPR	gi|31615935	2042.72	N4H4F0S2G0	1031.28	6179.61	6	-3	10.1781	0.54261	O-linked glycosylation
13534	13536	52.2748	HYTNPSQDVTVPCPVPSTPPTPSPSTPPTPSPSCCHPR	gi|31615935	1751.62	N4H4F0S1G0	1179.31	5888.52	5	-4	10.157	0.63445	O-linked glycosylation
14236	14237	54.2477	HYTNPSQDVTVPCPVPSTPPTPSPSTPPTPSPSCCHPR	gi|31615935	1752.64	N4H4F2S0G0	1473.63	5889.5	4	-2	9.2388	-6.2686	O-linked glycosylation
12806	12808	50.2262	HYTNPSQDVTVPCPVPSTPPTPSPSTPPTPSPSCCHPR	gi|31615935	1136.42	N4H2F0S0G0	1319.83	5273.3	4	-3	9.2276	-2.3199	O-linked glycosylation
12390	12391	49.054	HYTNPSQDVTVPCPVPSTPPTPSPSTPPTPSPSCCHPR	gi|31615935	1460.53	N4H4F0S0G0	1400.61	5597.42	4	-2	9.225	-0.6501	O-linked glycosylation
14990	14994	56.3782	HYTNPSQDVTVPCPVPSTPPTPSPSTPPTPSPSCCHPR	gi|31615935	2083.75	N5H3F0S2G0	1556.67	6220.64	4	-3	9.2249	0.42714	O-linked glycosylation
13911	13912	53.3318	HYTNPSQDVTVPCPVPSTPPTPSPSTPPTPSPSCCHPR	gi|31615935	1751.62	N4H4F0S1G0	1179.11	5888.52	5	-3	9.1841	0.20913	O-linked glycosylation
13716	13720	52.7912	HYTNPSQDVTVPCPVPSTPPTPSPSTPPTPSPSCCHPR	gi|31615935	1751.62	N4H4F0S1G0	1179.11	5888.51	5	-3	9.1702	-1.4493	O-linked glycosylation
14275	14276	54.3575	HYTNPSQDVTVPCPVPSTPPTPSPSTPPTPSPSCCHPR	gi|31615935	1752.64	N4H4F2S0G0	1178.71	5889.5	5	0	9.1664	-6.1264	O-linked glycosylation
12702	12706	49.9385	HYTNPSQDVTVPCPVPSTPPTPSPSTPPTPSPSCCHPR	gi|31615935	1136.42	N4H2F0S0G0	1055.87	5273.3	5	-2	9.1618	-3.2139	O-linked glycosylation
12182	12187	48.4802	HYTNPSQDVTVPCPVPSTPPTPSPSTPPTPSPSCCHPR	gi|31615935	1298.48	N4H3F0S0G0	1088.48	5435.38	5	-3	9.1597	1.6876	O-linked glycosylation
14067	14070	53.7772	HYTNPSQDVTVPCPVPSTPPTPSPSTPPTPSPSCCHPR	gi|31615935	1589.57	N4H3F0S1G0	1146.7	5726.47	5	-3	9.1265	0.56757	O-linked glycosylation
12494	12499	49.3572	HYTNPSQDVTVPCPVPSTPPTPSPSTPPTPSPSCCHPR	gi|31615935	933.344	N3H2F0S0G0	1268.82	5070.24	4	-2	8.2369	0.7153	O-linked glycosylation
11415	11416	46.3135	HYTNPSQDVTVPCPVPSTPPTPSPSTPPTPSPSCCHPR	gi|31615935	1825.66	N5H5F0S0G0	1492.4	5962.56	4	-4	8.2222	0.98766	O-linked glycosylation
12754	12766	50.1058	HYTNPSQDVTVPCPVPSTPPTPSPSTPPTPSPSCCHPR	gi|31615935	1095.4	N3H3F0S0G0	1309.58	5232.28	4	-3	8.2125	-0.80046	O-linked glycosylation
12091	12097	48.2272	HYTNPSQDVTVPCPVPSTPPTPSPSTPPTPSPSCCHPR	gi|31615935	1095.4	N3H3F0S0G0	1309.58	5232.29	4	-3	8.2121	0.22607	O-linked glycosylation
12715	12717	49.9698	HYTNPSQDVTVPCPVPSTPPTPSPSTPPTPSPSCCHPR	gi|31615935	1298.48	N4H3F0S0G0	1360.6	5435.35	4	-4	8.1787	-3.419	O-linked glycosylation
13534	13543	52.2932	HYTNPSQDVTVPCPVPSTPPTPSPSTPPTPSPSCCHPR	gi|31615935	1386.49	N3H3F0S1G0	1106.09	5523.39	5	-3	8.1726	1.1729	O-linked glycosylation
13690	13691	52.7105	HYTNPSQDVTVPCPVPSTPPTPSPSTPPTPSPSCCHPR	gi|31615935	1751.62	N4H4F0S1G0	1473.64	5888.51	4	-3	8.1716	-0.22408	O-linked glycosylation
15952	15953	59.078	HYTNPSQDVTVPCPVPSTPPTPSPSTPPTPSPSCCHPR	gi|31615935	2042.72	N4H4F0S2G0	1546.66	6179.58	4	-4	8.1619	-4.105	O-linked glycosylation
13079	13080	50.9907	HYTNPSQDVTVPCPVPSTPPTPSPSTPPTPSPSCCHPR	gi|31615935	1298.48	N4H3F0S0G0	1360.35	5435.35	4	-3	8.1589	-3.5205	O-linked glycosylation
15939	15941	59.0442	HYTNPSQDVTVPCPVPSTPPTPSPSTPPTPSPSCCHPR	gi|31615935	2043.74	N4H4F2S1G0	1237.53	6180.59	5	-3	8.1434	-6.2717	O-linked glycosylation
15575	15576	58.0178	HYTNPSQDVTVPCPVPSTPPTPSPSTPPTPSPSCCHPR	gi|31615935	2043.74	N4H4F2S1G0	1237.52	6180.58	5	-3	8.1394	-8.2467	O-linked glycosylation
13534	13538	52.28	HYTNPSQDVTVPCPVPSTPPTPSPSTPPTPSPSCCHPR	gi|31615935	1386.49	N3H3F0S1G0	1382.35	5523.37	4	-3	7.2001	-1.499	O-linked glycosylation
14691	14693	55.531	HYTNPSQDVTVPCPVPSTPPTPSPSTPPTPSPSCCHPR	gi|31615935	1590.59	N4H3F2S0G0	1433.37	5727.44	4	-3	7.1677	-6.5088	O-linked glycosylation
13755	13766	52.9192	HYTNPSQDVTVPCPVPSTPPTPSPSTPPTPSPSCCHPR	gi|31615935	1589.57	N4H3F0S1G0	955.752	5726.46	6	-3	7.1532	0.11773	O-linked glycosylation
12156	12160	48.4043	HYTNPSQDVTVPCPVPSTPPTPSPSTPPTPSPSCCHPR	gi|31615935	1339.5	N5H2F0S0G0	1370.61	5476.39	4	-3	7.1454	-0.50515	O-linked glycosylation
12208	12210	48.5455	HYTNPSQDVTVPCPVPSTPPTPSPSTPPTPSPSCCHPR	gi|31615935	1339.5	N5H2F0S0G0	1097.09	5476.4	5	-5	7.1387	0.69701	O-linked glycosylation
15926	15928	59.0072	HYTNPSQDVTVPCPVPSTPPTPSPSTPPTPSPSCCHPR	gi|31615935	2083.75	N5H3F0S2G0	1245.93	6220.61	5	-5	7.1301	-4.8529	O-linked glycosylation
12091	12096	48.2245	HYTNPSQDVTVPCPVPSTPPTPSPSTPPTPSPSCCHPR	gi|31615935	1825.66	N5H5F0S0G0	1194.32	5962.54	5	-5	6.2557	-1.7063	O-linked glycosylation
12494	12502	49.365	HYTNPSQDVTVPCPVPSTPPTPSPSTPPTPSPSCCHPR	gi|31615935	1095.4	N3H3F0S0G0	1309.58	5232.29	4	-3	6.1928	0.31939	O-linked glycosylation
15185	15187	56.922	HYTNPSQDVTVPCPVPSTPPTPSPSTPPTPSPSCCHPR	gi|31615935	2083.75	N5H3F0S2G0	1556.67	6220.64	4	-3	6.1771	-0.20081	O-linked glycosylation
16121	16124	59.5587	HYTNPSQDVTVPCPVPSTPPTPSPSTPPTPSPSCCHPR	gi|31615935	2043.74	N4H4F2S1G0	1237.73	6180.59	5	-4	6.162	-7.249	O-linked glycosylation
15016	15023	56.4595	HYTNPSQDVTVPCPVPSTPPTPSPSTPPTPSPSCCHPR	gi|31615935	2083.75	N5H3F0S2G0	1038.28	6220.62	6	-4	6.151	-3.3344	O-linked glycosylation
12754	12761	50.0928	HYTNPSQDVTVPCPVPSTPPTPSPSTPPTPSPSCCHPR	gi|31615935	1501.56	N5H3F0S0G0	1129.29	5638.43	5	-4	6.1464	-3.1562	O-linked glycosylation
12169	12172	48.4383	HYTNPSQDVTVPCPVPSTPPTPSPSTPPTPSPSCCHPR	gi|31615935	1501.56	N5H3F0S0G0	1129.5	5638.43	5	-5	6.1452	-2.279	O-linked glycosylation
14496	14501	54.99	HYTNPSQDVTVPCPVPSTPPTPSPSTPPTPSPSCCHPR	gi|31615935	1387.51	N3H3F2S0G0	1382.85	5524.36	4	-4	6.1394	-7.3897	O-linked glycosylation
14951	14963	56.2897	HYTNPSQDVTVPCPVPSTPPTPSPSTPPTPSPSCCHPR	gi|31615935	2042.72	N4H4F0S2G0	1031.11	6179.61	6	-2	6.1354	0.29535	O-linked glycosylation
14639	14643	55.3898	HYTNPSQDVTVPCPVPSTPPTPSPSTPPTPSPSCCHPR	gi|31615935	1589.57	N4H3F0S1G0	1147.1	5726.43	5	-5	6.1347	-5.1659	O-linked glycosylation
14795	14797	55.8242	HYTNPSQDVTVPCPVPSTPPTPSPSTPPTPSPSCCHPR	gi|31615935	1752.64	N4H4F2S0G0	1474.13	5889.49	4	-4	5.2263	-8.3199	O-linked glycosylation
11688	11690	47.0823	HYTNPSQDVTVPCPVPSTPPTPSPSTPPTPSPSCCHPR	gi|31615935	1704.63	N6H3F0S0G0	1461.89	5841.52	4	-3	5.2035	-1.121	O-linked glycosylation
15380	15383	57.4745	HYTNPSQDVTVPCPVPSTPPTPSPSTPPTPSPSCCHPR	gi|31615935	2042.72	N4H4F0S2G0	1546.41	6179.6	4	-3	5.1791	-0.87561	O-linked glycosylation
11909	11920	47.7292	HYTNPSQDVTVPCPVPSTPPTPSPSTPPTPSPSCCHPR	gi|31615935	1517.58	N3H2F4S0G0	1132.1	5654.44	5	-2	5.1768	-3.8354	O-linked glycosylation
12884	12889	50.4532	HYTNPSQDVTVPCPVPSTPPTPSPSTPPTPSPSCCHPR	gi|31615935	933.344	N3H2F0S0G0	1269.31	5070.21	4	-4	5.175	-4.4602	O-linked glycosylation
12611	12618	49.6913	HYTNPSQDVTVPCPVPSTPPTPSPSTPPTPSPSCCHPR	gi|31615935	1136.42	N4H2F0S0G0	1319.83	5273.3	4	-3	5.1746	-2.3199	O-linked glycosylation
12156	12159	48.4018	HYTNPSQDVTVPCPVPSTPPTPSPSTPPTPSPSCCHPR	gi|31615935	1501.56	N5H3F0S0G0	1411.12	5638.43	4	-3	5.1659	-2.3208	O-linked glycosylation
11792	11799	47.3887	HYTNPSQDVTVPCPVPSTPPTPSPSTPPTPSPSCCHPR	gi|31615935	1501.56	N5H3F0S0G0	1129.1	5638.45	5	-3	5.1657	-0.13644	O-linked glycosylation
11675	11678	47.0483	HYTNPSQDVTVPCPVPSTPPTPSPSTPPTPSPSCCHPR	gi|31615935	1704.63	N6H3F0S0G0	1169.71	5841.51	5	-3	5.1535	-2.4606	O-linked glycosylation
16303	16304	60.0672	HYTNPSQDVTVPCPVPSTPPTPSPSTPPTPSPSCCHPR	gi|31615935	2043.74	N4H4F2S1G0	1237.33	6180.6	5	-2	5.1485	-5.3931	O-linked glycosylation
13456	13458	52.0547	HYTNPSQDVTVPCPVPSTPPTPSPSTPPTPSPSCCHPR	gi|31615935	1751.62	N4H4F0S1G0	982.431	5888.54	6	-1	5.1441	4.4974	O-linked glycosylation
12195	12198	48.5113	HYTNPSQDVTVPCPVPSTPPTPSPSTPPTPSPSCCHPR	gi|31615935	1460.53	N4H4F0S0G0	1400.86	5597.41	4	-3	5.1398	-2.2963	O-linked glycosylation
25780	25781	86.7133	LPTQNITFQTESSVAEQEAEFQSPK	gi|262050538, gi|31542984	2204.77	N4H5F0S2G0	1254.79	5014.13	4	-2	21.4082	0.77291	N-linked glycosylation
27431	27432	91.3633	IEETTMTTQTPAPIQAPSAILPLPGQSVER	gi|262050538, gi|31542984	1021.36	N2H2F0S1G0	1054.26	4214.01	4	0	20.5652	0.4166	O-linked glycosylation
32514	32522	105.724	IEETTMTTQTPAPIQAPSAILPLPGQSVER	gi|262050538, gi|31542984	1312.46	N2H2F0S2G0	1128.04	4505.11	4	-4	14.4172	2.4639	O-linked glycosylation
27236	27243	90.8302	IEETTMTTQTPAPIQAPSAILPLPGQSVER	gi|262050538, gi|31542984	1021.36	N2H2F0S1G0	1054.51	4214.01	4	-1	12.5156	-0.031901	O-linked glycosylation
28263	28272	93.7255	IEETTMTTQTPAPIQAPSAILPLPGQSVER	gi|262050538, gi|31542984	1021.36	N2H2F0S1G0	1050.76	4198.02	4	-2	8.4749	0.98158	O-linked glycosylation
23258	23262	79.6222	IEETTMTTQTPAPIQAPSAILPLPGQSVER	gi|262050538, gi|31542984	730.264	N2H2F0S0G0	1308.98	3922.9	3	-2	6.5632	-1.7726	O-linked glycosylation
27730	27736	92.218	IEETTMTTQTPAPIQAPSAILPLPGQSVER	gi|262050538, gi|31542984	1021.36	N2H2F0S1G0	1055.26	4213.99	4	-4	6.4999	-3.579	O-linked glycosylation
24272	24282	82.4927	IEETTMTTQTPAPIQAPSAILPLPGQSVER	gi|262050538, gi|31542984	730.264	N2H2F0S0G0	977.989	3906.93	4	-2	6.493	2.7268	O-linked glycosylation
27925	27933	92.7728	IEETTMTTQTPAPIQAPSAILPLPGQSVER	gi|262050538, gi|31542984	656.228	N1H1F0S1G0	963.478	3848.88	4	-2	6.419	2.2962	O-linked glycosylation
28133	28135	93.3408	IEETTMTTQTPAPIQAPSAILPLPGQSVER	gi|262050538, gi|31542984	1021.36	N2H2F0S1G0	1055.26	4213.99	4	-4	6.3449	-4.7377	O-linked glycosylation
27938	27950	92.8198	IEETTMTTQTPAPIQAPSAILPLPGQSVER	gi|262050538, gi|31542984	1021.36	N2H2F0S1G0	1055.26	4213.99	4	-4	5.4422	-3.8107	O-linked glycosylation
28315	28323	93.8688	IEETTMTTQTPAPIQAPSAILPLPGQSVER	gi|262050538, gi|31542984	1022.38	N2H2F2S0G0	1400.68	4199.01	3	-1	5.4327	-4.9937	O-linked glycosylation
14002	14009	53.604	VFHIHNESWVLLTPK	gi|21450861, gi|21450863, gi|333440461, gi|530426019, gi|768014600	1540.53	N2H7F0S0G0	841.386	3360.51	4	-2	6.487	0.053338	N-linked glycosylation
14054	14059	53.7453	VFHIHNESWVLLTPK	gi|21450861, gi|21450863, gi|333440461, gi|530426019, gi|768014600	1581.56	N3H6F0S0G0	851.393	3401.54	4	-1	6.4249	1.1141	N-linked glycosylation
16784	16788	61.4283	VFHIHNESWVLLTPK	gi|21450861, gi|21450863, gi|333440461, gi|530426019, gi|768014600	1710.6	N3H5F0S1G0	883.903	3530.58	4	-2	6.2599	-0.67138	N-linked glycosylation
6853	6860	33.4837	IDSTGNVTNELR	gi|21450861, gi|21450863, gi|333440461, gi|530426019, gi|768014600	1216.42	N2H5F0S0G0	845.701	2535.09	3	0	5.6139	1.3096	N-linked glycosylation
9595	9596	41.1907	NHSCSEGQISIFR	gi|21450861, gi|21450863, gi|333440461, gi|530426019, gi|768014600	1913.68	N4H5F0S1G0	1150.47	3448.39	3	-1	5.3159	2.5682	N-linked glycosylation
22322	22325	76.9908	EGDHEFLEVPEAQEDVEATFPVHQPGNYSCSYR	gi|21071030	1216.42	N2H5F0S0G0	1264.77	5053.05	4	-3	5.2677	-9.9576	N-linked glycosylation
4127	4136	25.0367	VTACHSSQPNATLYK	gi|205277441, gi|530422150, gi|578838460	1913.68	N4H5F0S1G0	1197.5	3590.48	3	0	8.3843	0.20095	N-linked glycosylation
8478	8479	38.0482	HANWTLTPLK	gi|19923106	1622.58	N4H5F0S0G0	935.082	2803.23	3	0	10.3806	0.54447	N-linked glycosylation
11909	11910	47.7032	HANWTLTPLK	gi|19923106	1913.68	N4H5F0S1G0	1032.45	3094.32	3	-1	9.3441	0.039595	N-linked glycosylation
16056	16057	59.3713	HANWTLTPLK	gi|19923106	2204.77	N4H5F0S2G0	1129.48	3385.42	3	-1	8.3308	0.19784	N-linked glycosylation
12091	12092	48.214	HANWTLTPLK	gi|19923106	1913.68	N4H5F0S1G0	1032.45	3094.33	3	-1	7.3853	0.63134	N-linked glycosylation
8439	8442	37.9432	HANWTLTPLK	gi|19923106	1622.58	N4H5F0S0G0	935.082	2803.23	3	0	7.3221	0.15256	N-linked glycosylation
12130	12136	48.3363	HANWTLTPLK	gi|19923106	1710.6	N3H5F0S1G0	964.755	2891.25	3	-1	6.3712	0.69447	N-linked glycosylation
11935	11943	47.7942	HANWTLTPLK	gi|19923106	1710.6	N3H5F0S1G0	964.752	2891.24	3	-1	5.3977	-2.4721	N-linked glycosylation
12273	12275	48.7282	HANWTLTPLK	gi|19923106	1913.68	N4H5F0S1G0	1032.45	3094.33	3	-1	5.3539	0.39464	N-linked glycosylation
33333	33334	108.023	ADTHDEILEGLNFNLTEIPEAQIHEGFQELLR	gi|189163528, gi|189163530, gi|189163532, gi|189163534, gi|189163536, gi|189163538, gi|189163540, gi|189163542, gi|50363217, gi|50363219, gi|50363221	1913.68	N4H5F0S1G0	1402.88	5605.5	4	-3	33.4388	0.21381	N-linked glycosylation
33242	33245	107.77	ADTHDEILEGLNFNLTEIPEAQIHEGFQELLR	gi|189163528, gi|189163530, gi|189163532, gi|189163534, gi|189163536, gi|189163538, gi|189163540, gi|189163542, gi|50363217, gi|50363219, gi|50363221	1913.68	N4H5F0S1G0	1122.31	5605.51	5	-2	33.3826	1.9425	N-linked glycosylation
36024	36025	115.668	ADTHDEILEGLNFNLTEIPEAQIHEGFQELLR	gi|189163528, gi|189163530, gi|189163532, gi|189163534, gi|189163536, gi|189163538, gi|189163540, gi|189163542, gi|50363217, gi|50363219, gi|50363221	2204.77	N4H5F0S2G0	1180.73	5896.6	5	-3	31.3814	0.54236	N-linked glycosylation
38143	38146	121.677	ADTHDEILEGLNFNLTEIPEAQIHEGFQELLR	gi|189163528, gi|189163530, gi|189163532, gi|189163534, gi|189163536, gi|189163538, gi|189163540, gi|189163542, gi|50363217, gi|50363219, gi|50363221	2861	N5H6F0S3G0	1311.97	6552.82	5	-3	31.3125	-0.56446	N-linked glycosylation
38143	38150	121.688	ADTHDEILEGLNFNLTEIPEAQIHEGFQELLR	gi|189163528, gi|189163530, gi|189163532, gi|189163534, gi|189163536, gi|189163538, gi|189163540, gi|189163542, gi|50363217, gi|50363219, gi|50363221	3007.06	N5H6F1S3G0	1341.38	6698.86	5	-4	30.2973	-2.6623	N-linked glycosylation
30941	30942	101.259	ADTHDEILEGLNFNLTEIPEAQIHEGFQELLR	gi|189163528, gi|189163530, gi|189163532, gi|189163534, gi|189163536, gi|189163538, gi|189163540, gi|189163542, gi|50363217, gi|50363219, gi|50363221	1622.58	N4H5F0S0G0	1329.86	5314.41	4	-2	29.4898	0.24848	N-linked glycosylation
35829	35830	115.118	ADTHDEILEGLNFNLTEIPEAQIHEGFQELLR	gi|189163528, gi|189163530, gi|189163532, gi|189163534, gi|189163536, gi|189163538, gi|189163540, gi|189163542, gi|50363217, gi|50363219, gi|50363221	2569.9	N5H6F0S2G0	1253.75	6261.73	5	-3	26.3572	0.64754	N-linked glycosylation
38143	38148	121.683	ADTHDEILEGLNFNLTEIPEAQIHEGFQELLR	gi|189163528, gi|189163530, gi|189163532, gi|189163534, gi|189163536, gi|189163538, gi|189163540, gi|189163542, gi|50363217, gi|50363219, gi|50363221	2861	N5H6F0S3G0	1639.71	6552.81	4	-3	26.357	-2.1646	N-linked glycosylation
35998	35999	115.595	ADTHDEILEGLNFNLTEIPEAQIHEGFQELLR	gi|189163528, gi|189163530, gi|189163532, gi|189163534, gi|189163536, gi|189163538, gi|189163540, gi|189163542, gi|50363217, gi|50363219, gi|50363221	2204.77	N4H5F0S2G0	1475.66	5896.59	4	-3	25.435	-0.65622	N-linked glycosylation
35829	35831	115.121	ADTHDEILEGLNFNLTEIPEAQIHEGFQELLR	gi|189163528, gi|189163530, gi|189163532, gi|189163534, gi|189163536, gi|189163538, gi|189163540, gi|189163542, gi|50363217, gi|50363219, gi|50363221	2569.9	N5H6F0S2G0	1566.94	6261.73	4	-3	25.3971	0.10369	N-linked glycosylation
33424	33425	108.282	ADTHDEILEGLNFNLTEIPEAQIHEGFQELLR	gi|189163528, gi|189163530, gi|189163532, gi|189163534, gi|189163536, gi|189163538, gi|189163540, gi|189163542, gi|50363217, gi|50363219, gi|50363221	1913.68	N4H5F0S1G0	1122.31	5605.52	5	-2	24.4279	2.4869	N-linked glycosylation
36011	36013	115.634	ADTHDEILEGLNFNLTEIPEAQIHEGFQELLR	gi|189163528, gi|189163530, gi|189163532, gi|189163534, gi|189163536, gi|189163538, gi|189163540, gi|189163542, gi|50363217, gi|50363219, gi|50363221	2569.9	N5H6F0S2G0	1253.75	6261.73	5	-3	23.3545	0.64754	N-linked glycosylation
38156	38159	121.714	ADTHDEILEGLNFNLTEIPEAQIHEGFQELLR	gi|189163528, gi|189163530, gi|189163532, gi|189163534, gi|189163536, gi|189163538, gi|189163540, gi|189163542, gi|50363217, gi|50363219, gi|50363221	3007.06	N5H6F1S3G0	1676.47	6698.85	4	-4	23.3217	-4.1911	N-linked glycosylation
38143	38147	121.68	ADTHDEILEGLNFNLTEIPEAQIHEGFQELLR	gi|189163528, gi|189163530, gi|189163532, gi|189163534, gi|189163536, gi|189163538, gi|189163540, gi|189163542, gi|50363217, gi|50363219, gi|50363221	3226.13	N6H7F0S3G0	1385.2	6917.94	5	-4	23.2835	-2.078	N-linked glycosylation
28315	28316	93.8505	YLGNATAIFFLPDEGK	gi|189163528, gi|189163530, gi|189163532, gi|189163534, gi|189163536, gi|189163538, gi|189163540, gi|189163542, gi|50363217, gi|50363219, gi|50363221	1913.68	N4H5F0S1G0	1224.2	3669.58	3	-1	22.4232	1.7045	N-linked glycosylation
36180	36181	116.112	ADTHDEILEGLNFNLTEIPEAQIHEGFQELLR	gi|189163528, gi|189163530, gi|189163532, gi|189163534, gi|189163536, gi|189163538, gi|189163540, gi|189163542, gi|50363217, gi|50363219, gi|50363221	2204.77	N4H5F0S2G0	1475.66	5896.59	4	-3	22.4163	-0.90465	N-linked glycosylation
35959	35971	115.514	ADTHDEILEGLNFNLTEIPEAQIHEGFQELLR	gi|189163528, gi|189163530, gi|189163532, gi|189163534, gi|189163536, gi|189163538, gi|189163540, gi|189163542, gi|50363217, gi|50363219, gi|50363221	2221.79	N4H6F1S1G0	1183.53	5913.62	5	0	21.4201	2.0706	N-linked glycosylation
23830	23831	81.2222	YLGNATAIFFLPDEGK	gi|189163528, gi|189163530, gi|189163532, gi|189163534, gi|189163536, gi|189163538, gi|189163540, gi|189163542, gi|50363217, gi|50363219, gi|50363221	1622.58	N4H5F0S0G0	1126.83	3378.48	3	0	21.3846	1.9959	N-linked glycosylation
35738	35739	114.862	ADTHDEILEGLNFNLTEIPEAQIHEGFQELLR	gi|189163528, gi|189163530, gi|189163532, gi|189163534, gi|189163536, gi|189163538, gi|189163540, gi|189163542, gi|50363217, gi|50363219, gi|50363221	2715.96	N5H6F1S2G0	1282.97	6407.79	5	-3	21.3399	0.41719	N-linked glycosylation
33723	33724	109.131	YLGNATAIFFLPDEGK	gi|189163528, gi|189163530, gi|189163532, gi|189163534, gi|189163536, gi|189163538, gi|189163540, gi|189163542, gi|50363217, gi|50363219, gi|50363221	2204.77	N4H5F0S2G0	991.425	3960.67	4	-2	21.3104	0.65147	N-linked glycosylation
28341	28342	93.9233	YLGNATAIFFLPDEGK	gi|189163528, gi|189163530, gi|189163532, gi|189163534, gi|189163536, gi|189163538, gi|189163540, gi|189163542, gi|50363217, gi|50363219, gi|50363221	1913.68	N4H5F0S1G0	918.15	3669.58	4	0	20.3949	1.318	N-linked glycosylation
33203	33205	107.657	ADTHDEILEGLNFNLTEIPEAQIHEGFQELLR	gi|189163528, gi|189163530, gi|189163532, gi|189163534, gi|189163536, gi|189163538, gi|189163540, gi|189163542, gi|50363217, gi|50363219, gi|50363221	2278.81	N5H6F0S1G0	1195.54	5970.65	5	-3	20.3448	2.1822	N-linked glycosylation
34074	34075	110.131	YLGNATAIFFLPDEGK	gi|189163528, gi|189163530, gi|189163532, gi|189163534, gi|189163536, gi|189163538, gi|189163540, gi|189163542, gi|50363217, gi|50363219, gi|50363221	2204.77	N4H5F0S2G0	1321.56	3960.67	3	-2	20.2911	0.80873	N-linked glycosylation
38143	38149	121.685	ADTHDEILEGLNFNLTEIPEAQIHEGFQELLR	gi|189163528, gi|189163530, gi|189163532, gi|189163534, gi|189163536, gi|189163538, gi|189163540, gi|189163542, gi|50363217, gi|50363219, gi|50363221	3372.19	N6H7F1S3G0	1414.21	7064	5	-3	20.2759	-1.4619	N-linked glycosylation
36206	36207	116.186	ADTHDEILEGLNFNLTEIPEAQIHEGFQELLR	gi|189163528, gi|189163530, gi|189163532, gi|189163534, gi|189163536, gi|189163538, gi|189163540, gi|189163542, gi|50363217, gi|50363219, gi|50363221	2204.77	N4H5F0S2G0	1180.73	5896.61	5	-3	19.4072	1.5774	N-linked glycosylation
28497	28498	94.3648	YLGNATAIFFLPDEGK	gi|189163528, gi|189163530, gi|189163532, gi|189163534, gi|189163536, gi|189163538, gi|189163540, gi|189163542, gi|50363217, gi|50363219, gi|50363221	1913.68	N4H5F0S1G0	1224.2	3669.58	3	-1	19.3604	1.4051	N-linked glycosylation
33710	33711	109.094	YLGNATAIFFLPDEGK	gi|189163528, gi|189163530, gi|189163532, gi|189163534, gi|189163536, gi|189163538, gi|189163540, gi|189163542, gi|50363217, gi|50363219, gi|50363221	2204.77	N4H5F0S2G0	1321.56	3960.67	3	-2	19.3592	0.43889	N-linked glycosylation
36011	36012	115.632	ADTHDEILEGLNFNLTEIPEAQIHEGFQELLR	gi|189163528, gi|189163530, gi|189163532, gi|189163534, gi|189163536, gi|189163538, gi|189163540, gi|189163542, gi|50363217, gi|50363219, gi|50363221	2569.9	N5H6F0S2G0	1566.94	6261.73	4	-3	18.4074	0.33762	N-linked glycosylation
37090	37091	118.689	ADTHDEILEGLNFNLTEIPEAQIHEGFQELLR	gi|189163528, gi|189163530, gi|189163532, gi|189163534, gi|189163536, gi|189163538, gi|189163540, gi|189163542, gi|50363217, gi|50363219, gi|50363221	2205.79	N4H5F2S1G0	1475.9	5897.58	4	-3	18.2313	-6.185	N-linked glycosylation
30967	30968	101.332	ADTHDEILEGLNFNLTEIPEAQIHEGFQELLR	gi|189163528, gi|189163530, gi|189163532, gi|189163534, gi|189163536, gi|189163538, gi|189163540, gi|189163542, gi|50363217, gi|50363219, gi|50363221	1622.58	N4H5F0S0G0	1064.09	5314.42	5	-2	18.2213	2.4742	N-linked glycosylation
37116	37117	118.763	ADTHDEILEGLNFNLTEIPEAQIHEGFQELLR	gi|189163528, gi|189163530, gi|189163532, gi|189163534, gi|189163536, gi|189163538, gi|189163540, gi|189163542, gi|50363217, gi|50363219, gi|50363221	2205.79	N4H5F2S1G0	1180.93	5897.59	5	-3	18.2006	-5.3385	N-linked glycosylation
35894	35906	115.331	ADTHDEILEGLNFNLTEIPEAQIHEGFQELLR	gi|189163528, gi|189163530, gi|189163532, gi|189163534, gi|189163536, gi|189163538, gi|189163540, gi|189163542, gi|50363217, gi|50363219, gi|50363221	2222.81	N4H6F3S0G0	1183.73	5914.63	5	0	17.4133	-0.18177	N-linked glycosylation
33203	33204	107.655	ADTHDEILEGLNFNLTEIPEAQIHEGFQELLR	gi|189163528, gi|189163530, gi|189163532, gi|189163534, gi|189163536, gi|189163538, gi|189163540, gi|189163542, gi|50363217, gi|50363219, gi|50363221	2278.81	N5H6F0S1G0	1494.17	5970.63	4	-3	17.4003	-0.10559	N-linked glycosylation
33892	33893	109.612	YLGNATAIFFLPDEGK	gi|189163528, gi|189163530, gi|189163532, gi|189163534, gi|189163536, gi|189163538, gi|189163540, gi|189163542, gi|50363217, gi|50363219, gi|50363221	2204.77	N4H5F0S2G0	1321.56	3960.67	3	-2	17.3298	0.25396	N-linked glycosylation
36544	36545	117.143	ADTHDEILEGLNFNLTEIPEAQIHEGFQELLR	gi|189163528, gi|189163530, gi|189163532, gi|189163534, gi|189163536, gi|189163538, gi|189163540, gi|189163542, gi|50363217, gi|50363219, gi|50363221	2204.77	N4H5F0S2G0	1475.66	5896.59	4	-3	17.3291	-1.6499	N-linked glycosylation
33021	33024	107.144	ADTHDEILEGLNFNLTEIPEAQIHEGFQELLR	gi|189163528, gi|189163530, gi|189163532, gi|189163534, gi|189163536, gi|189163538, gi|189163540, gi|189163542, gi|50363217, gi|50363219, gi|50363221	2278.81	N5H6F0S1G0	1195.34	5970.65	5	-2	17.3276	2.6827	N-linked glycosylation
33515	33516	108.541	ADTHDEILEGLNFNLTEIPEAQIHEGFQELLR	gi|189163528, gi|189163530, gi|189163532, gi|189163534, gi|189163536, gi|189163538, gi|189163540, gi|189163542, gi|50363217, gi|50363219, gi|50363221	1913.68	N4H5F0S1G0	1402.63	5605.51	4	-2	16.3458	1.5092	N-linked glycosylation
35920	35921	115.375	ADTHDEILEGLNFNLTEIPEAQIHEGFQELLR	gi|189163528, gi|189163530, gi|189163532, gi|189163534, gi|189163536, gi|189163538, gi|189163540, gi|189163542, gi|50363217, gi|50363219, gi|50363221	2715.96	N5H6F1S2G0	1283.16	6407.78	5	-4	16.3427	-1.2875	N-linked glycosylation
33086	33090	107.331	ADTHDEILEGLNFNLTEIPEAQIHEGFQELLR	gi|189163528, gi|189163530, gi|189163532, gi|189163534, gi|189163536, gi|189163538, gi|189163540, gi|189163542, gi|50363217, gi|50363219, gi|50363221	2059.73	N4H5F1S1G0	1439.39	5751.54	4	-3	15.4049	-2.5575	N-linked glycosylation
34425	34426	111.132	ADTHDEILEGLNFNLTEIPEAQIHEGFQELLR	gi|189163528, gi|189163530, gi|189163532, gi|189163534, gi|189163536, gi|189163538, gi|189163540, gi|189163542, gi|50363217, gi|50363219, gi|50363221	1914.7	N4H5F2S0G0	1403.13	5606.47	4	-3	15.3688	-8.3891	N-linked glycosylation
33151	33152	107.507	ADTHDEILEGLNFNLTEIPEAQIHEGFQELLR	gi|189163528, gi|189163530, gi|189163532, gi|189163534, gi|189163536, gi|189163538, gi|189163540, gi|189163542, gi|50363217, gi|50363219, gi|50363221	2424.87	N5H6F1S1G0	1224.55	6116.7	5	-2	15.3458	1.6943	N-linked glycosylation
32293	32296	105.085	ADTHDEILEGLNFNLTEIPEAQIHEGFQELLR	gi|189163528, gi|189163530, gi|189163532, gi|189163534, gi|189163536, gi|189163538, gi|189163540, gi|189163542, gi|50363217, gi|50363219, gi|50363221	2204.77	N4H5F0S2G0	1180.73	5896.61	5	-3	15.2285	2.095	N-linked glycosylation
35881	35884	115.27	ADTHDEILEGLNFNLTEIPEAQIHEGFQELLR	gi|189163528, gi|189163530, gi|189163532, gi|189163534, gi|189163536, gi|189163538, gi|189163540, gi|189163542, gi|50363217, gi|50363219, gi|50363221	2204.77	N4H5F0S2G0	983.943	5896.61	6	-2	14.3273	2.3513	N-linked glycosylation
33671	33681	109.008	ADTHDEILEGLNFNLTEIPEAQIHEGFQELLR	gi|189163528, gi|189163530, gi|189163532, gi|189163534, gi|189163536, gi|189163538, gi|189163540, gi|189163542, gi|50363217, gi|50363219, gi|50363221	1914.7	N4H5F2S0G0	1122.7	5606.48	5	-3	14.3017	-7.4986	N-linked glycosylation
33541	33544	108.62	YLGNATAIFFLPDEGK	gi|189163528, gi|189163530, gi|189163532, gi|189163534, gi|189163536, gi|189163538, gi|189163540, gi|189163542, gi|50363217, gi|50363219, gi|50363221	2204.77	N4H5F0S2G0	990.926	3960.68	4	0	14.3009	2.7154	N-linked glycosylation
33138	33143	107.481	ADTHDEILEGLNFNLTEIPEAQIHEGFQELLR	gi|189163528, gi|189163530, gi|189163532, gi|189163534, gi|189163536, gi|189163538, gi|189163540, gi|189163542, gi|50363217, gi|50363219, gi|50363221	1913.68	N4H5F0S1G0	1402.63	5605.5	4	-2	14.2481	0.20254	N-linked glycosylation
33255	33262	107.818	ADTHDEILEGLNFNLTEIPEAQIHEGFQELLR	gi|189163528, gi|189163530, gi|189163532, gi|189163534, gi|189163536, gi|189163538, gi|189163540, gi|189163542, gi|50363217, gi|50363219, gi|50363221	1913.68	N4H5F0S1G0	935.594	5605.52	6	-3	13.4029	2.8443	N-linked glycosylation
35738	35743	114.872	ADTHDEILEGLNFNLTEIPEAQIHEGFQELLR	gi|189163528, gi|189163530, gi|189163532, gi|189163534, gi|189163536, gi|189163538, gi|189163540, gi|189163542, gi|50363217, gi|50363219, gi|50363221	2350.79	N2H12F0S0G0	1210.14	6042.64	5	-4	13.3401	4.159	N-linked glycosylation
33905	33906	109.649	YLGNATAIFFLPDEGK	gi|189163528, gi|189163530, gi|189163532, gi|189163534, gi|189163536, gi|189163538, gi|189163540, gi|189163542, gi|50363217, gi|50363219, gi|50363221	2204.77	N4H5F0S2G0	991.426	3960.67	4	-2	13.3143	1.3295	N-linked glycosylation
36388	36390	116.704	ADTHDEILEGLNFNLTEIPEAQIHEGFQELLR	gi|189163528, gi|189163530, gi|189163532, gi|189163534, gi|189163536, gi|189163538, gi|189163540, gi|189163542, gi|50363217, gi|50363219, gi|50363221	2204.77	N4H5F0S2G0	1180.73	5896.59	5	-3	13.3038	-0.59624	N-linked glycosylation
35634	35638	114.577	ADTHDEILEGLNFNLTEIPEAQIHEGFQELLR	gi|189163528, gi|189163530, gi|189163532, gi|189163534, gi|189163536, gi|189163538, gi|189163540, gi|189163542, gi|50363217, gi|50363219, gi|50363221	2569.9	N5H6F0S2G0	1254.15	6261.72	5	-5	13.2895	-1.0868	N-linked glycosylation
36934	36935	118.246	ADTHDEILEGLNFNLTEIPEAQIHEGFQELLR	gi|189163528, gi|189163530, gi|189163532, gi|189163534, gi|189163536, gi|189163538, gi|189163540, gi|189163542, gi|50363217, gi|50363219, gi|50363221	2205.79	N4H5F2S1G0	1180.93	5897.59	5	-3	13.2011	-4.7175	N-linked glycosylation
36921	36922	118.209	ADTHDEILEGLNFNLTEIPEAQIHEGFQELLR	gi|189163528, gi|189163530, gi|189163532, gi|189163534, gi|189163536, gi|189163538, gi|189163540, gi|189163542, gi|50363217, gi|50363219, gi|50363221	2570.93	N5H6F2S1G0	1253.95	6262.72	5	-3	13.1722	-5.1828	N-linked glycosylation
34061	34062	110.094	ADTHDEILEGLNFNLTEIPEAQIHEGFQELLR	gi|189163528, gi|189163530, gi|189163532, gi|189163534, gi|189163536, gi|189163538, gi|189163540, gi|189163542, gi|50363217, gi|50363219, gi|50363221	1914.7	N4H5F2S0G0	1403.13	5606.48	4	-3	13.1443	-6.6472	N-linked glycosylation
33164	33165	107.544	ADTHDEILEGLNFNLTEIPEAQIHEGFQELLR	gi|189163528, gi|189163530, gi|189163532, gi|189163534, gi|189163536, gi|189163538, gi|189163540, gi|189163542, gi|50363217, gi|50363219, gi|50363221	2424.87	N5H6F1S1G0	1530.68	6116.69	4	-3	12.3783	-0.62827	N-linked glycosylation
28679	28680	94.8788	YLGNATAIFFLPDEGK	gi|189163528, gi|189163530, gi|189163532, gi|189163534, gi|189163536, gi|189163538, gi|189163540, gi|189163542, gi|50363217, gi|50363219, gi|50363221	1913.68	N4H5F0S1G0	1224.53	3669.57	3	-2	12.3563	0.22477	N-linked glycosylation
35751	35752	114.898	ADTHDEILEGLNFNLTEIPEAQIHEGFQELLR	gi|189163528, gi|189163530, gi|189163532, gi|189163534, gi|189163536, gi|189163538, gi|189163540, gi|189163542, gi|50363217, gi|50363219, gi|50363221	2715.96	N5H6F1S2G0	1603.45	6407.78	4	-3	12.3323	-0.47622	N-linked glycosylation
34087	34088	110.168	YLGNATAIFFLPDEGK	gi|189163528, gi|189163530, gi|189163532, gi|189163534, gi|189163536, gi|189163538, gi|189163540, gi|189163542, gi|50363217, gi|50363219, gi|50363221	2204.77	N4H5F0S2G0	991.426	3960.67	4	-2	12.3203	1.2679	N-linked glycosylation
32267	32272	105.017	ADTHDEILEGLNFNLTEIPEAQIHEGFQELLR	gi|189163528, gi|189163530, gi|189163532, gi|189163534, gi|189163536, gi|189163538, gi|189163540, gi|189163542, gi|50363217, gi|50363219, gi|50363221	2205.79	N4H5F2S1G0	1180.33	5897.64	5	0	12.2703	3.0122	N-linked glycosylation
24012	24013	81.7362	YLGNATAIFFLPDEGK	gi|189163528, gi|189163530, gi|189163532, gi|189163534, gi|189163536, gi|189163538, gi|189163540, gi|189163542, gi|50363217, gi|50363219, gi|50363221	1622.58	N4H5F0S0G0	1126.83	3378.48	3	0	11.4179	0.58675	N-linked glycosylation
29043	29045	95.9098	YLGNATAIFFLPDEGK	gi|189163528, gi|189163530, gi|189163532, gi|189163534, gi|189163536, gi|189163538, gi|189163540, gi|189163542, gi|50363217, gi|50363219, gi|50363221	1913.68	N4H5F0S1G0	1224.53	3669.57	3	-2	11.3771	-0.6734	N-linked glycosylation
33320	33328	108.005	ADTHDEILEGLNFNLTEIPEAQIHEGFQELLR	gi|189163528, gi|189163530, gi|189163532, gi|189163534, gi|189163536, gi|189163538, gi|189163540, gi|189163542, gi|50363217, gi|50363219, gi|50363221	2059.73	N4H5F1S1G0	1439.65	5751.55	4	-4	11.3499	-1.4428	N-linked glycosylation
35933	35934	115.412	ADTHDEILEGLNFNLTEIPEAQIHEGFQELLR	gi|189163528, gi|189163530, gi|189163532, gi|189163534, gi|189163536, gi|189163538, gi|189163540, gi|189163542, gi|50363217, gi|50363219, gi|50363221	2715.96	N5H6F1S2G0	1603.45	6407.77	4	-3	11.3294	-2.3813	N-linked glycosylation
32969	32972	106.996	ADTHDEILEGLNFNLTEIPEAQIHEGFQELLR	gi|189163528, gi|189163530, gi|189163532, gi|189163534, gi|189163536, gi|189163538, gi|189163540, gi|189163542, gi|50363217, gi|50363219, gi|50363221	2425.89	N5H6F3S0G0	1224.55	6117.72	5	-1	11.2904	0.9032	N-linked glycosylation
38260	38266	122.01	ADTHDEILEGLNFNLTEIPEAQIHEGFQELLR	gi|189163528, gi|189163530, gi|189163532, gi|189163534, gi|189163536, gi|189163538, gi|189163540, gi|189163542, gi|50363217, gi|50363219, gi|50363221	3517.23	N6H7F0S4G0	1443.22	7209.05	5	-3	11.2386	-0.53846	N-linked glycosylation
34386	34387	111.02	ADTHDEILEGLNFNLTEIPEAQIHEGFQELLR	gi|189163528, gi|189163530, gi|189163532, gi|189163534, gi|189163536, gi|189163538, gi|189163540, gi|189163542, gi|50363217, gi|50363219, gi|50363221	1914.7	N4H5F2S0G0	1122.51	5606.5	5	-2	11.207	-4.3528	N-linked glycosylation
33528	33531	108.583	YLGNATAIFFLPDEGK	gi|189163528, gi|189163530, gi|189163532, gi|189163534, gi|189163536, gi|189163538, gi|189163540, gi|189163542, gi|50363217, gi|50363219, gi|50363221	2204.77	N4H5F0S2G0	1321.23	3960.66	3	-1	11.1806	-1.4263	N-linked glycosylation
36908	36909	118.173	ADTHDEILEGLNFNLTEIPEAQIHEGFQELLR	gi|189163528, gi|189163530, gi|189163532, gi|189163534, gi|189163536, gi|189163538, gi|189163540, gi|189163542, gi|50363217, gi|50363219, gi|50363221	2205.79	N4H5F2S1G0	1475.9	5897.58	4	-3	11.1366	-6.5161	N-linked glycosylation
28861	28863	95.396	YLGNATAIFFLPDEGK	gi|189163528, gi|189163530, gi|189163532, gi|189163534, gi|189163536, gi|189163538, gi|189163540, gi|189163542, gi|50363217, gi|50363219, gi|50363221	1913.68	N4H5F0S1G0	1223.86	3669.57	3	0	10.3898	0.48975	N-linked glycosylation
35699	35706	114.768	ADTHDEILEGLNFNLTEIPEAQIHEGFQELLR	gi|189163528, gi|189163530, gi|189163532, gi|189163534, gi|189163536, gi|189163538, gi|189163540, gi|189163542, gi|50363217, gi|50363219, gi|50363221	2569.9	N5H6F0S2G0	1044.97	6261.76	6	-3	10.3002	5.3632	N-linked glycosylation
34256	34257	110.65	YLGNATAIFFLPDEGK	gi|189163528, gi|189163530, gi|189163532, gi|189163534, gi|189163536, gi|189163538, gi|189163540, gi|189163542, gi|50363217, gi|50363219, gi|50363221	2204.77	N4H5F0S2G0	1320.89	3960.67	3	0	10.2982	0.03716	N-linked glycosylation
36193	36194	116.148	ADTHDEILEGLNFNLTEIPEAQIHEGFQELLR	gi|189163528, gi|189163530, gi|189163532, gi|189163534, gi|189163536, gi|189163538, gi|189163540, gi|189163542, gi|50363217, gi|50363219, gi|50363221	2569.9	N5H6F0S2G0	1253.16	6261.76	5	0	10.2479	4.8086	N-linked glycosylation
38156	38160	121.716	ADTHDEILEGLNFNLTEIPEAQIHEGFQELLR	gi|189163528, gi|189163530, gi|189163532, gi|189163534, gi|189163536, gi|189163538, gi|189163540, gi|189163542, gi|50363217, gi|50363219, gi|50363221	2245.8	N5H4F0S2G0	1486.4	5937.58	4	-5	10.2106	-7.3307	N-linked glycosylation
36921	36923	118.212	ADTHDEILEGLNFNLTEIPEAQIHEGFQELLR	gi|189163528, gi|189163530, gi|189163532, gi|189163534, gi|189163536, gi|189163538, gi|189163540, gi|189163542, gi|50363217, gi|50363219, gi|50363221	2570.93	N5H6F2S1G0	1566.94	6262.71	4	-2	10.166	-5.9705	N-linked glycosylation
28523	28525	94.441	YLGNATAIFFLPDEGK	gi|189163528, gi|189163530, gi|189163532, gi|189163534, gi|189163536, gi|189163538, gi|189163540, gi|189163542, gi|50363217, gi|50363219, gi|50363221	1913.68	N4H5F0S1G0	918.4	3669.57	4	-1	9.3809	-0.19504	N-linked glycosylation
30642	30649	100.43	ADTHDEILEGLNFNLTEIPEAQIHEGFQELLR	gi|189163528, gi|189163530, gi|189163532, gi|189163534, gi|189163536, gi|189163538, gi|189163540, gi|189163542, gi|50363217, gi|50363219, gi|50363221	1987.71	N5H6F0S0G0	1421.39	5679.51	4	-3	9.3691	-4.5489	N-linked glycosylation
29407	29408	96.9312	YLGNATAIFFLPDEGK	gi|189163528, gi|189163530, gi|189163532, gi|189163534, gi|189163536, gi|189163538, gi|189163540, gi|189163542, gi|50363217, gi|50363219, gi|50363221	1913.68	N4H5F0S1G0	1224.2	3669.58	3	-1	9.3143	1.0059	N-linked glycosylation
35920	35922	115.378	ADTHDEILEGLNFNLTEIPEAQIHEGFQELLR	gi|189163528, gi|189163530, gi|189163532, gi|189163534, gi|189163536, gi|189163538, gi|189163540, gi|189163542, gi|50363217, gi|50363219, gi|50363221	2350.79	N2H12F0S0G0	1511.92	6042.64	4	-2	9.3019	3.3119	N-linked glycosylation
34620	34621	111.686	YLGNATAIFFLPDEGK	gi|189163528, gi|189163530, gi|189163532, gi|189163534, gi|189163536, gi|189163538, gi|189163540, gi|189163542, gi|50363217, gi|50363219, gi|50363221	2204.77	N4H5F0S2G0	1321.56	3960.66	3	-2	9.2939	-1.5028	N-linked glycosylation
38143	38152	121.693	ADTHDEILEGLNFNLTEIPEAQIHEGFQELLR	gi|189163528, gi|189163530, gi|189163532, gi|189163534, gi|189163536, gi|189163538, gi|189163540, gi|189163542, gi|50363217, gi|50363219, gi|50363221	3226.13	N6H7F0S3G0	1731	6917.96	4	-3	9.2546	-0.1267	N-linked glycosylation
35647	35648	114.605	ADTHDEILEGLNFNLTEIPEAQIHEGFQELLR	gi|189163528, gi|189163530, gi|189163532, gi|189163534, gi|189163536, gi|189163538, gi|189163540, gi|189163542, gi|50363217, gi|50363219, gi|50363221	2935.04	N6H7F0S2G0	1326.98	6626.85	5	-4	9.2365	-1.7361	N-linked glycosylation
37272	37273	119.206	ADTHDEILEGLNFNLTEIPEAQIHEGFQELLR	gi|189163528, gi|189163530, gi|189163532, gi|189163534, gi|189163536, gi|189163538, gi|189163540, gi|189163542, gi|50363217, gi|50363219, gi|50363221	2205.79	N4H5F2S1G0	1475.9	5897.58	4	-3	9.2209	-6.185	N-linked glycosylation
34802	34803	112.205	YLGNATAIFFLPDEGK	gi|189163528, gi|189163530, gi|189163532, gi|189163534, gi|189163536, gi|189163538, gi|189163540, gi|189163542, gi|50363217, gi|50363219, gi|50363221	2204.77	N4H5F0S2G0	1321.23	3960.66	3	-1	9.2181	-2.166	N-linked glycosylation
30031	30035	98.6973	ADTHDEILEGLNFNLTEIPEAQIHEGFQELLR	gi|189163528, gi|189163530, gi|189163532, gi|189163534, gi|189163536, gi|189163538, gi|189163540, gi|189163542, gi|50363217, gi|50363219, gi|50363221	1913.68	N4H5F0S1G0	1122.71	5605.52	5	-4	9.1848	3.5982	N-linked glycosylation
33216	33221	107.702	ADTHDEILEGLNFNLTEIPEAQIHEGFQELLR	gi|189163528, gi|189163530, gi|189163532, gi|189163534, gi|189163536, gi|189163538, gi|189163540, gi|189163542, gi|50363217, gi|50363219, gi|50363221	2059.73	N4H5F1S1G0	1151.52	5751.57	5	-2	9.1834	2.3958	N-linked glycosylation
34789	34791	112.17	ADTHDEILEGLNFNLTEIPEAQIHEGFQELLR	gi|189163528, gi|189163530, gi|189163532, gi|189163534, gi|189163536, gi|189163538, gi|189163540, gi|189163542, gi|50363217, gi|50363219, gi|50363221	1913.68	N4H5F0S1G0	1403.13	5605.46	4	-4	9.1821	-6.5693	N-linked glycosylation
23713	23723	80.9173	YLGNATAIFFLPDEGK	gi|189163528, gi|189163530, gi|189163532, gi|189163534, gi|189163536, gi|189163538, gi|189163540, gi|189163542, gi|50363217, gi|50363219, gi|50363221	1622.58	N4H5F0S0G0	845.877	3378.48	4	-2	8.4331	-0.28288	N-linked glycosylation
32969	32976	107.007	ADTHDEILEGLNFNLTEIPEAQIHEGFQELLR	gi|189163528, gi|189163530, gi|189163532, gi|189163534, gi|189163536, gi|189163538, gi|189163540, gi|189163542, gi|50363217, gi|50363219, gi|50363221	2424.87	N5H6F1S1G0	1530.43	6116.68	4	-2	8.3605	-1.6763	N-linked glycosylation
28367	28370	94.002	YLGNATAIFFLPDEGK	gi|189163528, gi|189163530, gi|189163532, gi|189163534, gi|189163536, gi|189163538, gi|189163540, gi|189163542, gi|50363217, gi|50363219, gi|50363221	2059.73	N4H5F1S1G0	1272.88	3815.63	3	-1	8.3391	-0.03446	N-linked glycosylation
33814	33824	109.414	YLGNATAIFFLPDEGK	gi|189163528, gi|189163530, gi|189163532, gi|189163534, gi|189163536, gi|189163538, gi|189163540, gi|189163542, gi|50363217, gi|50363219, gi|50363221	2350.83	N4H5F1S2G0	1027.69	4106.74	4	-1	8.3318	3.576	N-linked glycosylation
36375	36378	116.67	ADTHDEILEGLNFNLTEIPEAQIHEGFQELLR	gi|189163528, gi|189163530, gi|189163532, gi|189163534, gi|189163536, gi|189163538, gi|189163540, gi|189163542, gi|50363217, gi|50363219, gi|50363221	2570.93	N5H6F2S1G0	1567.19	6262.71	4	-3	8.2689	-6.1164	N-linked glycosylation
34438	34439	111.168	YLGNATAIFFLPDEGK	gi|189163528, gi|189163530, gi|189163532, gi|189163534, gi|189163536, gi|189163538, gi|189163540, gi|189163542, gi|50363217, gi|50363219, gi|50363221	2204.77	N4H5F0S2G0	1321.56	3960.67	3	-2	8.2668	0.069039	N-linked glycosylation
29953	29954	98.4687	YLGNATAIFFLPDEGK	gi|189163528, gi|189163530, gi|189163532, gi|189163534, gi|189163536, gi|189163538, gi|189163540, gi|189163542, gi|50363217, gi|50363219, gi|50363221	1913.68	N4H5F0S1G0	1224.19	3669.56	3	-1	8.2657	-3.0857	N-linked glycosylation
36726	36728	117.661	ADTHDEILEGLNFNLTEIPEAQIHEGFQELLR	gi|189163528, gi|189163530, gi|189163532, gi|189163534, gi|189163536, gi|189163538, gi|189163540, gi|189163542, gi|50363217, gi|50363219, gi|50363221	2204.77	N4H5F0S2G0	1475.9	5896.57	4	-4	8.2364	-3.7094	N-linked glycosylation
34269	34271	110.689	YLGNATAIFFLPDEGK	gi|189163528, gi|189163530, gi|189163532, gi|189163534, gi|189163536, gi|189163538, gi|189163540, gi|189163542, gi|50363217, gi|50363219, gi|50363221	2204.77	N4H5F0S2G0	991.425	3960.67	4	-2	8.2175	0.83639	N-linked glycosylation
33879	33881	109.577	ADTHDEILEGLNFNLTEIPEAQIHEGFQELLR	gi|189163528, gi|189163530, gi|189163532, gi|189163534, gi|189163536, gi|189163538, gi|189163540, gi|189163542, gi|50363217, gi|50363219, gi|50363221	1914.7	N4H5F2S0G0	1402.88	5606.5	4	-2	8.2158	-4.0458	N-linked glycosylation
30798	30801	100.86	ADTHDEILEGLNFNLTEIPEAQIHEGFQELLR	gi|189163528, gi|189163530, gi|189163532, gi|189163534, gi|189163536, gi|189163538, gi|189163540, gi|189163542, gi|50363217, gi|50363219, gi|50363221	1768.64	N4H5F1S0G0	1366.62	5460.44	4	-3	8.1884	-3.4647	N-linked glycosylation
33593	33600	108.779	YLGNATAIFFLPDEGK	gi|189163528, gi|189163530, gi|189163532, gi|189163534, gi|189163536, gi|189163538, gi|189163540, gi|189163542, gi|50363217, gi|50363219, gi|50363221	2205.79	N4H5F2S1G0	1981.35	3961.69	2	0	8.134	1.0843	N-linked glycosylation
37103	37105	118.729	ADTHDEILEGLNFNLTEIPEAQIHEGFQELLR	gi|189163528, gi|189163530, gi|189163532, gi|189163534, gi|189163536, gi|189163538, gi|189163540, gi|189163542, gi|50363217, gi|50363219, gi|50363221	2570.93	N5H6F2S1G0	1253.95	6262.72	5	-3	8.1296	-4.4031	N-linked glycosylation
28146	28150	93.383	YLGNATAIFFLPDEGK	gi|189163528, gi|189163530, gi|189163532, gi|189163534, gi|189163536, gi|189163538, gi|189163540, gi|189163542, gi|50363217, gi|50363219, gi|50363221	1913.68	N4H5F0S1G0	918.653	3669.58	4	-2	7.3729	2.0842	N-linked glycosylation
29225	29226	96.419	YLGNATAIFFLPDEGK	gi|189163528, gi|189163530, gi|189163532, gi|189163534, gi|189163536, gi|189163538, gi|189163540, gi|189163542, gi|50363217, gi|50363219, gi|50363221	1913.68	N4H5F0S1G0	1224.2	3669.59	3	-1	7.3604	3.9	N-linked glycosylation
28120	28123	93.307	YLGNATAIFFLPDEGK	gi|189163528, gi|189163530, gi|189163532, gi|189163534, gi|189163536, gi|189163538, gi|189163540, gi|189163542, gi|50363217, gi|50363219, gi|50363221	1913.68	N4H5F0S1G0	1224.2	3669.59	3	-1	7.3453	5.0976	N-linked glycosylation
24194	24196	82.251	YLGNATAIFFLPDEGK	gi|189163528, gi|189163530, gi|189163532, gi|189163534, gi|189163536, gi|189163538, gi|189163540, gi|189163542, gi|50363217, gi|50363219, gi|50363221	1622.58	N4H5F0S0G0	1126.83	3378.48	3	0	7.3118	0.36996	N-linked glycosylation
28835	28836	95.3197	YLGNATAIFFLPDEGK	gi|189163528, gi|189163530, gi|189163532, gi|189163534, gi|189163536, gi|189163538, gi|189163540, gi|189163542, gi|50363217, gi|50363219, gi|50363221	1548.54	N3H4F0S1G0	1102.82	3304.45	3	-2	7.2808	1.505	N-linked glycosylation
36193	36195	116.151	ADTHDEILEGLNFNLTEIPEAQIHEGFQELLR	gi|189163528, gi|189163530, gi|189163532, gi|189163534, gi|189163536, gi|189163538, gi|189163540, gi|189163542, gi|50363217, gi|50363219, gi|50363221	2569.9	N5H6F0S2G0	1567.19	6261.7	4	-4	7.2608	-3.9411	N-linked glycosylation
34984	34985	112.722	YLGNATAIFFLPDEGK	gi|189163528, gi|189163530, gi|189163532, gi|189163534, gi|189163536, gi|189163538, gi|189163540, gi|189163542, gi|50363217, gi|50363219, gi|50363221	2204.77	N4H5F0S2G0	1321.23	3960.66	3	-1	7.2239	-2.6283	N-linked glycosylation
29589	29590	97.4438	YLGNATAIFFLPDEGK	gi|189163528, gi|189163530, gi|189163532, gi|189163534, gi|189163536, gi|189163538, gi|189163540, gi|189163542, gi|50363217, gi|50363219, gi|50363221	1913.68	N4H5F0S1G0	1224.53	3669.57	3	-2	7.2198	0.025176	N-linked glycosylation
36284	36287	116.411	ADTHDEILEGLNFNLTEIPEAQIHEGFQELLR	gi|189163528, gi|189163530, gi|189163532, gi|189163534, gi|189163536, gi|189163538, gi|189163540, gi|189163542, gi|50363217, gi|50363219, gi|50363221	2716.98	N5H6F3S1G0	1282.96	6408.78	5	-2	7.1678	-4.6234	N-linked glycosylation
34204	34206	110.504	ADTHDEILEGLNFNLTEIPEAQIHEGFQELLR	gi|189163528, gi|189163530, gi|189163532, gi|189163534, gi|189163536, gi|189163538, gi|189163540, gi|189163542, gi|50363217, gi|50363219, gi|50363221	1913.68	N4H5F0S1G0	1122.91	5605.51	5	-5	7.1384	1.4318	N-linked glycosylation
37129	37134	118.81	ADTHDEILEGLNFNLTEIPEAQIHEGFQELLR	gi|189163528, gi|189163530, gi|189163532, gi|189163534, gi|189163536, gi|189163538, gi|189163540, gi|189163542, gi|50363217, gi|50363219, gi|50363221	2205.79	N4H5F2S1G0	984.274	5897.59	6	-3	7.129	-4.1194	N-linked glycosylation
34009	34015	109.959	ADTHDEILEGLNFNLTEIPEAQIHEGFQELLR	gi|189163528, gi|189163530, gi|189163532, gi|189163534, gi|189163536, gi|189163538, gi|189163540, gi|189163542, gi|50363217, gi|50363219, gi|50363221	1913.68	N4H5F0S1G0	1122.71	5605.5	5	-4	7.1074	-0.9749	N-linked glycosylation
23635	23639	80.6827	YLGNATAIFFLPDEGK	gi|189163528, gi|189163530, gi|189163532, gi|189163534, gi|189163536, gi|189163538, gi|189163540, gi|189163542, gi|50363217, gi|50363219, gi|50363221	1622.58	N4H5F0S0G0	1126.83	3378.48	3	0	6.3495	0.15317	N-linked glycosylation
35725	35730	114.836	ADTHDEILEGLNFNLTEIPEAQIHEGFQELLR	gi|189163528, gi|189163530, gi|189163532, gi|189163534, gi|189163536, gi|189163538, gi|189163540, gi|189163542, gi|50363217, gi|50363219, gi|50363221	2350.79	N2H12F0S0G0	1511.92	6042.65	4	-2	6.3046	4.7664	N-linked glycosylation
29771	29772	97.9558	YLGNATAIFFLPDEGK	gi|189163528, gi|189163530, gi|189163532, gi|189163534, gi|189163536, gi|189163538, gi|189163540, gi|189163542, gi|50363217, gi|50363219, gi|50363221	1913.68	N4H5F0S1G0	1224.54	3669.58	3	-2	6.282	2.8195	N-linked glycosylation
33762	33765	109.247	YLGNATAIFFLPDEGK	gi|189163528, gi|189163530, gi|189163532, gi|189163534, gi|189163536, gi|189163538, gi|189163540, gi|189163542, gi|50363217, gi|50363219, gi|50363221	2350.79	N2H12F0S0G0	1370.25	4106.72	3	-2	6.2371	7.3836	N-linked glycosylation
30837	30845	100.984	ADTHDEILEGLNFNLTEIPEAQIHEGFQELLR	gi|189163528, gi|189163530, gi|189163532, gi|189163534, gi|189163536, gi|189163538, gi|189163540, gi|189163542, gi|50363217, gi|50363219, gi|50363221	1987.71	N5H6F0S0G0	1421.65	5679.55	4	-4	6.2043	1.6522	N-linked glycosylation
35894	35902	115.32	ADTHDEILEGLNFNLTEIPEAQIHEGFQELLR	gi|189163528, gi|189163530, gi|189163532, gi|189163534, gi|189163536, gi|189163538, gi|189163540, gi|189163542, gi|50363217, gi|50363219, gi|50363221	2569.9	N5H6F0S2G0	1044.96	6261.73	6	-3	6.1821	0.68453	N-linked glycosylation
38078	38079	121.489	ADTHDEILEGLNFNLTEIPEAQIHEGFQELLR	gi|189163528, gi|189163530, gi|189163532, gi|189163534, gi|189163536, gi|189163538, gi|189163540, gi|189163542, gi|50363217, gi|50363219, gi|50363221	2204.77	N4H5F0S2G0	1475.9	5896.55	4	-4	6.1609	-8.3466	N-linked glycosylation
36102	36104	115.892	ADTHDEILEGLNFNLTEIPEAQIHEGFQELLR	gi|189163528, gi|189163530, gi|189163532, gi|189163534, gi|189163536, gi|189163538, gi|189163540, gi|189163542, gi|50363217, gi|50363219, gi|50363221	2716.98	N5H6F3S1G0	1282.76	6408.78	5	-1	6.1233	-5.0142	N-linked glycosylation
34711	34712	111.945	ADTHDEILEGLNFNLTEIPEAQIHEGFQELLR	gi|189163528, gi|189163530, gi|189163532, gi|189163534, gi|189163536, gi|189163538, gi|189163540, gi|189163542, gi|50363217, gi|50363219, gi|50363221	2861	N5H6F0S3G0	1312.17	6552.8	5	-4	6.1048	-3.3491	N-linked glycosylation
28172	28176	93.4563	YLGNATAIFFLPDEGK	gi|189163528, gi|189163530, gi|189163532, gi|189163534, gi|189163536, gi|189163538, gi|189163540, gi|189163542, gi|50363217, gi|50363219, gi|50363221	1913.68	N4H5F0S1G0	1835.79	3669.57	2	-1	5.325	0.077918	N-linked glycosylation
24376	24378	82.7648	YLGNATAIFFLPDEGK	gi|189163528, gi|189163530, gi|189163532, gi|189163534, gi|189163536, gi|189163538, gi|189163540, gi|189163542, gi|50363217, gi|50363219, gi|50363221	1622.58	N4H5F0S0G0	1127.16	3378.48	3	-1	5.2941	-0.37012	N-linked glycosylation
36102	36103	115.89	ADTHDEILEGLNFNLTEIPEAQIHEGFQELLR	gi|189163528, gi|189163530, gi|189163532, gi|189163534, gi|189163536, gi|189163538, gi|189163540, gi|189163542, gi|50363217, gi|50363219, gi|50363221	2350.79	N2H12F0S0G0	1511.92	6042.65	4	-2	5.2591	4.6856	N-linked glycosylation
35296	35300	113.619	ADTHDEILEGLNFNLTEIPEAQIHEGFQELLR	gi|189163528, gi|189163530, gi|189163532, gi|189163534, gi|189163536, gi|189163538, gi|189163540, gi|189163542, gi|50363217, gi|50363219, gi|50363221	2823.01	N6H9F1S0G0	1303.78	6514.85	5	0	5.2231	1.8048	N-linked glycosylation
34555	34559	111.509	YLGNATAIFFLPDEGK	gi|189163528, gi|189163530, gi|189163532, gi|189163534, gi|189163536, gi|189163538, gi|189163540, gi|189163542, gi|50363217, gi|50363219, gi|50363221	2204.77	N4H5F0S2G0	991.426	3960.67	4	-2	5.2023	1.083	N-linked glycosylation
25962	25965	87.2308	YLGNATAIFFLPDEGK	gi|189163528, gi|189163530, gi|189163532, gi|189163534, gi|189163536, gi|189163538, gi|189163540, gi|189163542, gi|50363217, gi|50363219, gi|50363221	2204.77	N4H5F0S2G0	1321.23	3960.67	3	-1	5.1704	0.14556	N-linked glycosylation
37896	37903	120.991	ADTHDEILEGLNFNLTEIPEAQIHEGFQELLR	gi|189163528, gi|189163530, gi|189163532, gi|189163534, gi|189163536, gi|189163538, gi|189163540, gi|189163542, gi|50363217, gi|50363219, gi|50363221	2205.79	N4H5F2S1G0	1180.54	5897.64	5	-1	5.1434	4.0578	N-linked glycosylation
36557	36559	117.183	ADTHDEILEGLNFNLTEIPEAQIHEGFQELLR	gi|189163528, gi|189163530, gi|189163532, gi|189163534, gi|189163536, gi|189163538, gi|189163540, gi|189163542, gi|50363217, gi|50363219, gi|50363221	2569.9	N5H6F0S2G0	1254.15	6261.71	5	-5	5.1227	-2.7439	N-linked glycosylation
34087	34095	110.186	ADTHDEILEGLNFNLTEIPEAQIHEGFQELLR	gi|189163528, gi|189163530, gi|189163532, gi|189163534, gi|189163536, gi|189163538, gi|189163540, gi|189163542, gi|50363217, gi|50363219, gi|50363221	2278.81	N5H6F0S1G0	1494.41	5970.61	4	-4	5.1069	-3.2027	N-linked glycosylation
18669	18670	66.7187	VVLHPNYSQVDIGLIK	gi|186910296, gi|4826762, gi|767989864	1913.68	N4H5F0S1G0	1237.57	3708.68	3	-2	22.3043	-2.1324	N-linked glycosylation
15861	15862	58.822	VVLHPNYSQVDIGLIK	gi|186910296, gi|4826762, gi|767989864	1622.58	N4H5F0S0G0	1139.87	3417.6	3	0	19.352	2.2037	N-linked glycosylation
18851	18852	67.2263	VVLHPNYSQVDIGLIK	gi|186910296, gi|4826762, gi|767989864	1913.68	N4H5F0S1G0	1237.57	3708.69	3	-2	19.328	-0.05877	N-linked glycosylation
22478	22479	77.422	VVLHPNYSQVDIGLIK	gi|186910296, gi|4826762, gi|767989864	2204.77	N4H5F0S2G0	1334.6	3999.78	3	-2	18.2919	-0.65013	N-linked glycosylation
18812	18813	67.1172	VVLHPNYSQVDIGLIK	gi|186910296, gi|4826762, gi|767989864	1913.68	N4H5F0S1G0	927.934	3708.71	4	0	18.2784	6.8817	N-linked glycosylation
22491	22492	77.458	VVLHPNYSQVDIGLIK	gi|186910296, gi|4826762, gi|767989864	2204.77	N4H5F0S2G0	1001.2	3999.79	4	-2	18.2563	0.81166	N-linked glycosylation
22660	22661	77.9315	VVLHPNYSQVDIGLIK	gi|186910296, gi|4826762, gi|767989864	2204.77	N4H5F0S2G0	1334.6	3999.79	3	-2	17.296	0.26545	N-linked glycosylation
18994	18995	67.6277	VVLHPNYSQVDIGLIK	gi|186910296, gi|4826762, gi|767989864	1913.68	N4H5F0S1G0	928.43	3708.69	4	-2	17.2758	0.59614	N-linked glycosylation
22673	22674	77.9678	VVLHPNYSQVDIGLIK	gi|186910296, gi|4826762, gi|767989864	2204.77	N4H5F0S2G0	1001.2	3999.79	4	-2	17.2668	0.8727	N-linked glycosylation
15874	15875	58.8582	VVLHPNYSQVDIGLIK	gi|186910296, gi|4826762, gi|767989864	1622.58	N4H5F0S0G0	855.155	3417.6	4	0	16.3355	0.87846	N-linked glycosylation
22296	22297	76.9133	VVLHPNYSQVDIGLIK	gi|186910296, gi|4826762, gi|767989864	2204.77	N4H5F0S2G0	1334.6	3999.79	3	-2	16.3137	1.2726	N-linked glycosylation
22309	22310	76.9493	VVLHPNYSQVDIGLIK	gi|186910296, gi|4826762, gi|767989864	2204.77	N4H5F0S2G0	1001.21	3999.79	4	-2	16.2531	2.3376	N-linked glycosylation
18409	18410	65.99	VVLHPNYSQVDIGLIK	gi|186910296, gi|4826762, gi|767989864	2278.81	N5H6F0S1G0	1359.28	4073.82	3	-2	15.3009	0.096848	N-linked glycosylation
18591	18592	66.5002	VVLHPNYSQVDIGLIK	gi|186910296, gi|4826762, gi|767989864	2278.81	N5H6F0S1G0	1359.28	4073.82	3	-2	15.2936	-0.26273	N-linked glycosylation
18526	18527	66.3187	VVLHPNYSQVDIGLIK	gi|186910296, gi|4826762, gi|767989864	2278.81	N5H6F0S1G0	1019.71	4073.82	4	-2	15.272	0.51328	N-linked glycosylation
22036	22037	76.185	VVLHPNYSQVDIGLIK	gi|186910296, gi|4826762, gi|767989864	2569.9	N5H6F0S2G0	1092.49	4364.92	4	-2	15.2464	0.71629	N-linked glycosylation
16043	16044	59.3343	VVLHPNYSQVDIGLIK	gi|186910296, gi|4826762, gi|767989864	1622.58	N4H5F0S0G0	1139.87	3417.6	3	0	14.355	1.1322	N-linked glycosylation
18617	18620	66.5785	VVLHPNYSQVDIGLIK	gi|186910296, gi|4826762, gi|767989864	1913.68	N4H5F0S1G0	928.431	3708.69	4	-2	14.232	1.2544	N-linked glycosylation
19410	19411	68.7978	VVLHPNYSQVDIGLIK	gi|186910296, gi|4826762, gi|767989864	1913.68	N4H5F0S1G0	1237.57	3708.69	3	-2	13.3073	0.23746	N-linked glycosylation
22855	22856	78.4812	VVLHPNYSQVDIGLIK	gi|186910296, gi|4826762, gi|767989864	2204.77	N4H5F0S2G0	1001.2	3999.79	4	-2	13.2653	0.56751	N-linked glycosylation
22218	22219	76.695	VVLHPNYSQVDIGLIK	gi|186910296, gi|4826762, gi|767989864	2569.9	N5H6F0S2G0	1092.49	4364.92	4	-2	13.2431	1.4993	N-linked glycosylation
22842	22843	78.4447	VVLHPNYSQVDIGLIK	gi|186910296, gi|4826762, gi|767989864	2204.77	N4H5F0S2G0	1334.27	3999.79	3	-1	12.3057	0.24966	N-linked glycosylation
18708	18709	66.8272	VVLHPNYSQVDIGLIK	gi|186910296, gi|4826762, gi|767989864	2278.81	N5H6F0S1G0	1019.46	4073.83	4	-1	12.272	1.3967	N-linked glycosylation
26352	26353	88.323	VVLHPNYSQVDIGLIK	gi|186910296, gi|4826762, gi|767989864	2861	N5H6F0S3G0	1165.26	4656.02	4	-2	12.214	0.84148	N-linked glycosylation
15692	15693	58.3463	VVLHPNYSQVDIGLIK	gi|186910296, gi|4826762, gi|767989864	1987.71	N5H6F0S0G0	1262.25	3782.72	3	-2	11.3341	-0.71805	N-linked glycosylation
22049	22050	76.2215	VVLHPNYSQVDIGLIK	gi|186910296, gi|4826762, gi|767989864	2569.9	N5H6F0S2G0	1456.31	4364.92	3	-2	11.2767	0.80306	N-linked glycosylation
19176	19178	68.1407	VVLHPNYSQVDIGLIK	gi|186910296, gi|4826762, gi|767989864	1913.68	N4H5F0S1G0	928.179	3708.69	4	-1	11.264	-0.21083	N-linked glycosylation
19540	19541	69.1647	VVLHPNYSQVDIGLIK	gi|186910296, gi|4826762, gi|767989864	1914.7	N4H5F2S0G0	928.427	3709.68	4	-1	11.1822	-7.8816	N-linked glycosylation
19683	19687	69.5733	VVLHPNYSQVDIGLIK	gi|186910296, gi|4826762, gi|767989864	1913.68	N4H5F0S1G0	1236.9	3708.69	3	0	11.1715	-0.68528	N-linked glycosylation
18773	18774	67.0085	VVLHPNYSQVDIGLIK	gi|186910296, gi|4826762, gi|767989864	2278.81	N5H6F0S1G0	1359.28	4073.82	3	-2	10.2982	0.63621	N-linked glycosylation
19358	19359	68.6512	VVLHPNYSQVDIGLIK	gi|186910296, gi|4826762, gi|767989864	1913.68	N4H5F0S1G0	927.929	3708.69	4	0	10.2908	0.69376	N-linked glycosylation
22231	22232	76.7312	VVLHPNYSQVDIGLIK	gi|186910296, gi|4826762, gi|767989864	2569.9	N5H6F0S2G0	1456.32	4364.92	3	-2	10.28	1.4742	N-linked glycosylation
23206	23210	79.4762	VVLHPNYSQVDIGLIK	gi|186910296, gi|4826762, gi|767989864	2204.77	N4H5F0S2G0	1333.94	3999.79	3	0	10.225	2.6144	N-linked glycosylation
23219	23220	79.5048	VVLHPNYSQVDIGLIK	gi|186910296, gi|4826762, gi|767989864	2205.79	N4H5F2S1G0	1001.2	4000.77	4	-1	10.1883	-7.6596	N-linked glycosylation
18994	18996	67.6303	VVLHPNYSQVDIGLIK	gi|186910296, gi|4826762, gi|767989864	1548.54	N3H4F0S1G0	1115.53	3343.57	3	-1	10.181	4.6615	N-linked glycosylation
19488	19491	69.0237	VVLHPNYSQVDIGLIK	gi|186910296, gi|4826762, gi|767989864	1913.68	N4H5F0S1G0	1236.9	3708.7	3	0	10.1037	2.1783	N-linked glycosylation
16225	16226	59.8468	VVLHPNYSQVDIGLIK	gi|186910296, gi|4826762, gi|767989864	1622.58	N4H5F0S0G0	1139.87	3417.6	3	0	9.3011	1.5608	N-linked glycosylation
16056	16058	59.3738	VVLHPNYSQVDIGLIK	gi|186910296, gi|4826762, gi|767989864	1622.58	N4H5F0S0G0	855.405	3417.59	4	-1	9.2983	-0.31748	N-linked glycosylation
26170	26171	87.8108	VVLHPNYSQVDIGLIK	gi|186910296, gi|4826762, gi|767989864	2861	N5H6F0S3G0	1165.26	4656.01	4	-2	9.2072	0.63174	N-linked glycosylation
19644	19645	69.456	VVLHPNYSQVDIGLIK	gi|186910296, gi|4826762, gi|767989864	1914.7	N4H5F2S0G0	1237.56	3709.67	3	-1	9.1689	-9.2932	N-linked glycosylation
23401	23402	80.0163	VVLHPNYSQVDIGLIK	gi|186910296, gi|4826762, gi|767989864	2204.77	N4H5F0S2G0	1001.45	3999.75	4	-3	9.1161	-8.9997	N-linked glycosylation
18838	18844	67.203	VVLHPNYSQVDIGLIK	gi|186910296, gi|4826762, gi|767989864	1751.62	N4H4F0S1G0	1183.55	3546.63	3	-2	8.283	-2.2113	N-linked glycosylation
26716	26717	89.3527	VVLHPNYSQVDIGLIK	gi|186910296, gi|4826762, gi|767989864	2861	N5H6F0S3G0	1165.26	4656.01	4	-2	8.2144	0.422	N-linked glycosylation
22920	22931	78.6902	VVLHPNYSQVDIGLIK	gi|186910296, gi|4826762, gi|767989864	2204.77	N4H5F0S2G0	1333.93	3999.78	3	0	8.2132	-1.4142	N-linked glycosylation
19826	19827	69.9675	VVLHPNYSQVDIGLIK	gi|186910296, gi|4826762, gi|767989864	1913.68	N4H5F0S1G0	1237.57	3708.68	3	-2	8.2115	-2.7249	N-linked glycosylation
21893	21894	75.7843	VVLHPNYSQVDIGLIK	gi|186910296, gi|4826762, gi|767989864	2935.04	N6H7F0S2G0	1183.77	4730.05	4	-2	8.2106	-0.34504	N-linked glycosylation
19722	19723	69.6757	VVLHPNYSQVDIGLIK	gi|186910296, gi|4826762, gi|767989864	1913.68	N4H5F0S1G0	928.426	3708.67	4	-2	8.1416	-3.8144	N-linked glycosylation
22179	22188	76.6068	VVLHPNYSQVDIGLIK	gi|186910296, gi|4826762, gi|767989864	2204.77	N4H5F0S2G0	801.165	3999.79	5	-2	7.2789	0.51859	N-linked glycosylation
18318	18319	65.7345	VVLHPNYSQVDIGLIK	gi|186910296, gi|4826762, gi|767989864	2643.94	N6H7F0S1G0	1111	4438.95	4	-2	7.2439	0.33404	N-linked glycosylation
19904	19907	70.1928	VVLHPNYSQVDIGLIK	gi|186910296, gi|4826762, gi|767989864	1913.68	N4H5F0S1G0	928.428	3708.68	4	-2	7.2296	-1.7737	N-linked glycosylation
16771	16772	61.3838	VVLHPNYSQVDIGLIK	gi|186910296, gi|4826762, gi|767989864	1622.58	N4H5F0S0G0	1140.54	3417.58	3	-2	7.2291	-2.5813	N-linked glycosylation
22010	22011	76.1122	VVLHPNYSQVDIGLIK	gi|186910296, gi|4826762, gi|767989864	2715.96	N5H6F1S2G0	1129	4510.98	4	-2	7.2142	0.19743	N-linked glycosylation
16238	16241	59.8888	VVLHPNYSQVDIGLIK	gi|186910296, gi|4826762, gi|767989864	1622.58	N4H5F0S0G0	855.658	3417.6	4	-2	6.3398	2.1298	N-linked glycosylation
21204	21210	73.8615	VVLHPNYSQVDIGLIK	gi|186910296, gi|4826762, gi|767989864	1913.68	N4H5F0S1G0	928.178	3708.68	4	-1	6.2959	-1.0666	N-linked glycosylation
15497	15507	57.8222	VVLHPNYSQVDIGLIK	gi|186910296, gi|4826762, gi|767989864	1987.71	N5H6F0S0G0	1262.25	3782.73	3	-2	6.2918	0.92774	N-linked glycosylation
21100	21101	73.5553	VVLHPNYSQVDIGLIK	gi|186910296, gi|4826762, gi|767989864	1913.68	N4H5F0S1G0	1236.9	3708.69	3	0	6.2829	0.40091	N-linked glycosylation
17889	17890	64.5287	VVLHPNYSQVDIGLIK	gi|186910296, gi|4826762, gi|767989864	2204.77	N4H5F0S2G0	1000.95	3999.78	4	-1	6.2815	0.18549	N-linked glycosylation
15705	15706	58.3828	VVLHPNYSQVDIGLIK	gi|186910296, gi|4826762, gi|767989864	1987.71	N5H6F0S0G0	946.939	3782.73	4	-2	6.2671	-0.10823	N-linked glycosylation
20840	20842	72.8255	VVLHPNYSQVDIGLIK	gi|186910296, gi|4826762, gi|767989864	1913.68	N4H5F0S1G0	927.929	3708.69	4	0	6.2607	1.4837	N-linked glycosylation
20099	20100	70.737	VVLHPNYSQVDIGLIK	gi|186910296, gi|4826762, gi|767989864	1913.68	N4H5F0S1G0	927.928	3708.69	4	0	6.2553	-0.22785	N-linked glycosylation
20281	20283	71.2537	VVLHPNYSQVDIGLIK	gi|186910296, gi|4826762, gi|767989864	1913.68	N4H5F0S1G0	927.929	3708.69	4	0	6.2487	0.75959	N-linked glycosylation
18331	18335	65.7792	VVLHPNYSQVDIGLIK	gi|186910296, gi|4826762, gi|767989864	2278.81	N5H6F0S1G0	1019.71	4073.82	4	-2	6.2467	0.75299	N-linked glycosylation
22400	22401	77.2037	VVLHPNYSQVDIGLIK	gi|186910296, gi|4826762, gi|767989864	2569.9	N5H6F0S2G0	1092.49	4364.92	4	-2	6.2257	0.94002	N-linked glycosylation
18513	18514	66.2823	VVLHPNYSQVDIGLIK	gi|186910296, gi|4826762, gi|767989864	2424.87	N5H6F1S1G0	1407.97	4219.88	3	-2	5.325	-0.72564	N-linked glycosylation
22023	22025	76.1512	VVLHPNYSQVDIGLIK	gi|186910296, gi|4826762, gi|767989864	1913.68	N4H5F0S1G0	928.429	3708.69	4	-2	5.3	-0.72044	N-linked glycosylation
21022	21024	73.338	VVLHPNYSQVDIGLIK	gi|186910296, gi|4826762, gi|767989864	1913.68	N4H5F0S1G0	928.432	3708.7	4	-2	5.2936	2.7685	N-linked glycosylation
15224	15226	57.0328	VVLHPNYSQVDIGLIK	gi|186910296, gi|4826762, gi|767989864	1913.68	N4H5F0S1G0	928.18	3708.69	4	-1	5.2895	1.3691	N-linked glycosylation
18071	18073	65.0432	VVLHPNYSQVDIGLIK	gi|186910296, gi|4826762, gi|767989864	2204.77	N4H5F0S2G0	1001.2	3999.78	4	-2	5.2767	-0.22599	N-linked glycosylation
15679	15682	58.315	VVLHPNYSQVDIGLIK	gi|186910296, gi|4826762, gi|767989864	1622.58	N4H5F0S0G0	855.406	3417.6	4	-1	5.2764	1.5399	N-linked glycosylation
18825	18834	67.1747	VVLHPNYSQVDIGLIK	gi|186910296, gi|4826762, gi|767989864	1751.62	N4H4F0S1G0	887.67	3546.65	4	-1	5.2729	5.1673	N-linked glycosylation
26417	26418	88.5062	VVLHPNYSQVDIGLIK	gi|186910296, gi|4826762, gi|767989864	2861	N5H6F0S3G0	1553.34	4656.01	3	-2	5.2697	-1.4106	N-linked glycosylation
15510	15513	57.8403	VVLHPNYSQVDIGLIK	gi|186910296, gi|4826762, gi|767989864	1987.71	N5H6F0S0G0	946.938	3782.72	4	-2	5.2661	-0.49547	N-linked glycosylation
15029	15035	56.4933	VVLHPNYSQVDIGLIK	gi|186910296, gi|4826762, gi|767989864	1913.68	N4H5F0S1G0	927.934	3708.71	4	0	5.262	6.0918	N-linked glycosylation
21464	21465	74.5773	VVLHPNYSQVDIGLIK	gi|186910296, gi|4826762, gi|767989864	1913.68	N4H5F0S1G0	1237.24	3708.69	3	-1	5.255	0.022952	N-linked glycosylation
20554	20555	72.0188	VVLHPNYSQVDIGLIK	gi|186910296, gi|4826762, gi|767989864	1913.68	N4H5F0S1G0	1236.9	3708.69	3	0	5.2531	1.3883	N-linked glycosylation
18695	18697	66.7935	VVLHPNYSQVDIGLIK	gi|186910296, gi|4826762, gi|767989864	2204.77	N4H5F0S2G0	1001.2	3999.78	4	-2	5.2474	-1.6909	N-linked glycosylation
20736	20738	72.5328	VVLHPNYSQVDIGLIK	gi|186910296, gi|4826762, gi|767989864	1913.68	N4H5F0S1G0	1237.57	3708.68	3	-2	5.2422	-1.7374	N-linked glycosylation
26599	26601	89.0247	VVLHPNYSQVDIGLIK	gi|186910296, gi|4826762, gi|767989864	2861	N5H6F0S3G0	1552.67	4656	3	0	5.2389	-1.9096	N-linked glycosylation
18890	18891	67.3355	VVLHPNYSQVDIGLIK	gi|186910296, gi|4826762, gi|767989864	2278.81	N5H6F0S1G0	1019.96	4073.82	4	-3	5.2376	-0.43009	N-linked glycosylation
22374	22378	77.1385	VVLHPNYSQVDIGLIK	gi|186910296, gi|4826762, gi|767989864	2204.77	N4H5F0S2G0	801.164	3999.78	5	-2	5.2368	-0.32069	N-linked glycosylation
22582	22585	77.7177	VVLHPNYSQVDIGLIK	gi|186910296, gi|4826762, gi|767989864	2569.9	N5H6F0S2G0	1092.74	4364.92	4	-3	5.2365	0.95448	N-linked glycosylation
21828	21834	75.6143	VVLHPNYSQVDIGLIK	gi|186910296, gi|4826762, gi|767989864	1913.68	N4H5F0S1G0	927.929	3708.69	4	0	5.2341	0.62793	N-linked glycosylation
20658	20660	72.314	VVLHPNYSQVDIGLIK	gi|186910296, gi|4826762, gi|767989864	1913.68	N4H5F0S1G0	927.926	3708.68	4	0	5.2317	-1.9394	N-linked glycosylation
18708	18710	66.8298	VVLHPNYSQVDIGLIK	gi|186910296, gi|4826762, gi|767989864	2075.73	N4H6F0S1G0	1291.59	3870.75	3	-2	5.229	1.5351	N-linked glycosylation
18955	18957	67.5212	VVLHPNYSQVDIGLIK	gi|186910296, gi|4826762, gi|767989864	2278.81	N5H6F0S1G0	1359.28	4073.83	3	-2	5.2272	1.8048	N-linked glycosylation
22114	22122	76.4222	VVLHPNYSQVDIGLIK	gi|186910296, gi|4826762, gi|767989864	2204.77	N4H5F0S2G0	1000.95	3999.79	4	-1	5.2179	1.5894	N-linked glycosylation
22309	22312	76.9545	VVLHPNYSQVDIGLIK	gi|186910296, gi|4826762, gi|767989864	2350.83	N4H5F1S2G0	1383.29	4145.85	3	-2	5.2149	2.9556	N-linked glycosylation
15926	15932	59.0177	VVLHPNYSQVDIGLIK	gi|186910296, gi|4826762, gi|767989864	1257.45	N3H4F0S0G0	1018.83	3052.46	3	-2	5.2102	-0.81127	N-linked glycosylation
26144	26145	87.7377	VVLHPNYSQVDIGLIK	gi|186910296, gi|4826762, gi|767989864	3226.13	N6H7F0S3G0	1256.54	5021.14	4	-2	5.2013	-0.5564	N-linked glycosylation
19254	19255	68.3582	VVLHPNYSQVDIGLIK	gi|186910296, gi|4826762, gi|767989864	2279.83	N5H6F2S0G0	1019.71	4074.81	4	-1	5.1997	-6.9652	N-linked glycosylation
16407	16412	60.3708	VVLHPNYSQVDIGLIK	gi|186910296, gi|4826762, gi|767989864	1622.58	N4H5F0S0G0	1139.87	3417.6	3	0	5.1756	0.81069	N-linked glycosylation
26326	26328	88.2522	VVLHPNYSQVDIGLIK	gi|186910296, gi|4826762, gi|767989864	3226.13	N6H7F0S3G0	1256.55	5021.15	4	-2	5.1598	1.583	N-linked glycosylation
17265	17266	62.7725	MVSHHNLTTGATLINEQWLLTTAK	gi|186910296, gi|45580723, gi|4826762, gi|767989864, gi|767989866, gi|767989868	1622.58	N4H5F0S0G0	1076.25	4301.99	4	0	25.3558	2.6403	N-linked glycosylation
19709	19710	69.6387	MVSHHNLTTGATLINEQWLLTTAK	gi|186910296, gi|45580723, gi|4826762, gi|767989864, gi|767989866, gi|767989868	1913.68	N4H5F0S1G0	1149.53	4593.08	4	-2	23.3337	1.5034	N-linked glycosylation
19891	19892	70.1505	MVSHHNLTTGATLINEQWLLTTAK	gi|186910296, gi|45580723, gi|4826762, gi|767989864, gi|767989866, gi|767989868	1913.68	N4H5F0S1G0	1149.53	4593.08	4	-2	23.3148	1.5034	N-linked glycosylation
22582	22583	77.7123	MVSHHNLTTGATLINEQWLLTTAK	gi|186910296, gi|45580723, gi|4826762, gi|767989864, gi|767989866, gi|767989868	2204.77	N4H5F0S2G0	1222.3	4884.17	4	-2	23.3099	0.876	N-linked glycosylation
22764	22765	78.2243	MVSHHNLTTGATLINEQWLLTTAK	gi|186910296, gi|45580723, gi|4826762, gi|767989864, gi|767989866, gi|767989868	2204.77	N4H5F0S2G0	1222.3	4884.17	4	-2	23.2998	0.076224	N-linked glycosylation
19397	19398	68.7615	MVSHHNLTTGATLINEQWLLTTAK	gi|186910296, gi|45580723, gi|4826762, gi|767989864, gi|767989866, gi|767989868	1913.68	N4H5F0S1G0	1153.53	4609.07	4	-2	23.2904	1.2243	N-linked glycosylation
19033	19034	67.7375	MVSHHNLTTGATLINEQWLLTTAK	gi|186910296, gi|45580723, gi|4826762, gi|767989864, gi|767989866, gi|767989868	1913.68	N4H5F0S1G0	1153.03	4609.08	4	0	22.2694	4.3751	N-linked glycosylation
21971	21972	76.0033	MVSHHNLTTGATLINEQWLLTTAK	gi|186910296, gi|45580723, gi|4826762, gi|767989864, gi|767989866, gi|767989868	2204.77	N4H5F0S2G0	1226.3	4900.16	4	-2	22.2653	0.21696	N-linked glycosylation
19527	19528	69.1283	MVSHHNLTTGATLINEQWLLTTAK	gi|186910296, gi|45580723, gi|4826762, gi|767989864, gi|767989866, gi|767989868	1913.68	N4H5F0S1G0	1149.53	4593.08	4	-2	21.3267	1.1844	N-linked glycosylation
16797	16798	61.4568	MVSHHNLTTGATLINEQWLLTTAK	gi|186910296, gi|45580723, gi|4826762, gi|767989864, gi|767989866, gi|767989868	1622.58	N4H5F0S0G0	1080.75	4317.97	4	-2	21.3115	0.21889	N-linked glycosylation
19215	19216	68.248	MVSHHNLTTGATLINEQWLLTTAK	gi|186910296, gi|45580723, gi|4826762, gi|767989864, gi|767989866, gi|767989868	1913.68	N4H5F0S1G0	1153.53	4609.07	4	-2	21.2837	1.8599	N-linked glycosylation
22153	22154	76.513	MVSHHNLTTGATLINEQWLLTTAK	gi|186910296, gi|45580723, gi|4826762, gi|767989864, gi|767989866, gi|767989868	2204.77	N4H5F0S2G0	1226.3	4900.16	4	-2	20.2696	0.61554	N-linked glycosylation
16979	16980	61.9682	MVSHHNLTTGATLINEQWLLTTAK	gi|186910296, gi|45580723, gi|4826762, gi|767989864, gi|767989866, gi|767989868	1622.58	N4H5F0S0G0	1080.75	4317.97	4	-2	19.3501	0.89738	N-linked glycosylation
22335	22336	77.0217	MVSHHNLTTGATLINEQWLLTTAK	gi|186910296, gi|45580723, gi|4826762, gi|767989864, gi|767989866, gi|767989868	2204.77	N4H5F0S2G0	1226.3	4900.17	4	-2	19.284	2.7081	N-linked glycosylation
19514	19515	69.0918	MVSHHNLTTGATLINEQWLLTTAK	gi|186910296, gi|45580723, gi|4826762, gi|767989864, gi|767989866, gi|767989868	2278.81	N5H6F0S1G0	1240.81	4958.2	4	-2	18.3186	-0.84731	N-linked glycosylation
22647	22649	77.8977	MVSHHNLTTGATLINEQWLLTTAK	gi|186910296, gi|45580723, gi|4826762, gi|767989864, gi|767989866, gi|767989868	2204.77	N4H5F0S2G0	978.041	4884.17	5	-2	16.2867	0.18613	N-linked glycosylation
16901	16902	61.7488	MVSHHNLTTGATLINEQWLLTTAK	gi|186910296, gi|45580723, gi|4826762, gi|767989864, gi|767989866, gi|767989868	1954.7	N5H4F0S1G0	931.226	4650.09	5	-2	16.197	0.084428	N-linked glycosylation
22361	22362	77.0943	MVSHHNLTTGATLINEQWLLTTAK	gi|186910296, gi|45580723, gi|4826762, gi|767989864, gi|767989866, gi|767989868	2569.9	N5H6F0S2G0	1313.58	5249.31	4	-2	14.2829	1.955	N-linked glycosylation
22127	22129	76.4428	MVSHHNLTTGATLINEQWLLTTAK	gi|186910296, gi|45580723, gi|4826762, gi|767989864, gi|767989866, gi|767989868	2204.77	N4H5F0S2G0	981.24	4900.16	5	-2	14.2742	0.30159	N-linked glycosylation
23492	23493	80.2718	MVSHHNLTTGATLINEQWLLTTAK	gi|186910296, gi|45580723, gi|4826762, gi|767989864, gi|767989866, gi|767989868	2205.79	N4H5F2S1G0	1222.54	4885.15	4	-2	14.1815	-7.498	N-linked glycosylation
19176	19177	68.138	MVSHHNLTTGATLINEQWLLTTAK	gi|186910296, gi|45580723, gi|4826762, gi|767989864, gi|767989866, gi|767989868	2245.8	N5H4F0S2G0	989.445	4941.19	5	-2	14.1556	0.30138	N-linked glycosylation
16875	16876	61.676	MVSHHNLTTGATLINEQWLLTTAK	gi|186910296, gi|45580723, gi|4826762, gi|767989864, gi|767989866, gi|767989868	1954.7	N5H4F0S1G0	1163.78	4650.1	4	-2	14.1504	0.84841	N-linked glycosylation
19215	19217	68.2505	MVSHHNLTTGATLINEQWLLTTAK	gi|186910296, gi|45580723, gi|4826762, gi|767989864, gi|767989866, gi|767989868	1913.68	N4H5F0S1G0	923.022	4609.07	5	-2	13.3256	1.407	N-linked glycosylation
17161	17162	62.4803	MVSHHNLTTGATLINEQWLLTTAK	gi|186910296, gi|45580723, gi|4826762, gi|767989864, gi|767989866, gi|767989868	1622.58	N4H5F0S0G0	1081	4317.96	4	-3	13.271	-3.0458	N-linked glycosylation
21867	21868	75.7113	MVSHHNLTTGATLINEQWLLTTAK	gi|186910296, gi|45580723, gi|4826762, gi|767989864, gi|767989866, gi|767989868	2569.9	N5H6F0S2G0	1317.58	5265.29	4	-2	13.2596	-0.42364	N-linked glycosylation
25715	25716	86.5307	MVSHHNLTTGATLINEQWLLTTAK	gi|186910296, gi|45580723, gi|4826762, gi|767989864, gi|767989866, gi|767989868	2861	N5H6F0S3G0	1386.61	5540.39	4	-3	13.2457	-0.72559	N-linked glycosylation
17993	17994	64.8208	MVSHHNLTTGATLINEQWLLTTAK	gi|186910296, gi|45580723, gi|4826762, gi|767989864, gi|767989866, gi|767989868	1622.58	N4H5F0S0G0	1077	4301.96	4	-3	13.2095	-2.9908	N-linked glycosylation
4140	4144	25.06	NLFLNHSENATAK	gi|186910296, gi|45580723, gi|4826762, gi|767989864, gi|767989866, gi|767989868	1622.58	N4H5F0S0G0	1028.11	3081.31	3	-1	11.4567	-0.35746	N-linked glycosylation
19020	19024	67.7088	MVSHHNLTTGATLINEQWLLTTAK	gi|186910296, gi|45580723, gi|4826762, gi|767989864, gi|767989866, gi|767989868	1913.68	N4H5F0S1G0	922.621	4609.07	5	0	11.2741	2.1079	N-linked glycosylation
15094	15096	56.6662	MVSHHNLTTGATLINEQWLLTTAK	gi|186910296, gi|45580723, gi|4826762, gi|767989864, gi|767989866, gi|767989868	1663.61	N5H4F0S0G0	873.007	4359	5	-2	11.2596	-0.091491	N-linked glycosylation
25286	25287	85.3222	MVSHHNLTTGATLINEQWLLTTAK	gi|186910296, gi|45580723, gi|4826762, gi|767989864, gi|767989866, gi|767989868	2861	N5H6F0S3G0	1390.61	5556.39	4	-3	11.2202	0.10385	N-linked glycosylation
16082	16083	59.4438	MVSHHNLTTGATLINEQWLLTTAK	gi|186910296, gi|45580723, gi|4826762, gi|767989864, gi|767989866, gi|767989868	1913.68	N4H5F0S1G0	922.619	4609.06	5	0	11.1169	0.055327	N-linked glycosylation
19202	19203	68.2113	MVSHHNLTTGATLINEQWLLTTAK	gi|186910296, gi|45580723, gi|4826762, gi|767989864, gi|767989866, gi|767989868	1913.68	N4H5F0S1G0	1537.69	4609.06	3	-2	10.3533	-0.89178	N-linked glycosylation
19553	19557	69.2088	MVSHHNLTTGATLINEQWLLTTAK	gi|186910296, gi|45580723, gi|4826762, gi|767989864, gi|767989866, gi|767989868	1913.68	N4H5F0S1G0	919.424	4593.09	5	0	10.3442	3.8518	N-linked glycosylation
22322	22331	77.0063	MVSHHNLTTGATLINEQWLLTTAK	gi|186910296, gi|45580723, gi|4826762, gi|767989864, gi|767989866, gi|767989868	2204.77	N4H5F0S2G0	981.445	4900.19	5	-3	10.3053	5.1099	N-linked glycosylation
17525	17527	63.5065	MVSHHNLTTGATLINEQWLLTTAK	gi|186910296, gi|45580723, gi|4826762, gi|767989864, gi|767989866, gi|767989868	1622.58	N4H5F0S0G0	1081	4317.96	4	-3	10.1922	-3.272	N-linked glycosylation
19735	19736	69.7122	MVSHHNLTTGATLINEQWLLTTAK	gi|186910296, gi|45580723, gi|4826762, gi|767989864, gi|767989866, gi|767989868	1913.68	N4H5F0S1G0	1532.36	4593.07	3	-2	9.3851	-0.1151	N-linked glycosylation
22543	22544	77.6032	MVSHHNLTTGATLINEQWLLTTAK	gi|186910296, gi|45580723, gi|4826762, gi|767989864, gi|767989866, gi|767989868	2569.9	N5H6F0S2G0	1313.83	5249.29	4	-3	9.296	-0.82357	N-linked glycosylation
14925	14936	56.2135	MVSHHNLTTGATLINEQWLLTTAK	gi|186910296, gi|45580723, gi|4826762, gi|767989864, gi|767989866, gi|767989868	1663.61	N5H4F0S0G0	872.607	4359	5	0	9.2033	1.6998	N-linked glycosylation
17343	17345	62.9945	MVSHHNLTTGATLINEQWLLTTAK	gi|186910296, gi|45580723, gi|4826762, gi|767989864, gi|767989866, gi|767989868	1622.58	N4H5F0S0G0	1081	4317.96	4	-3	9.2033	-1.4627	N-linked glycosylation
22569	22572	77.6813	MVSHHNLTTGATLINEQWLLTTAK	gi|186910296, gi|45580723, gi|4826762, gi|767989864, gi|767989866, gi|767989868	2204.77	N4H5F0S2G0	1629.06	4884.16	3	-1	8.3399	-0.90887	N-linked glycosylation
19839	19849	70.0275	MVSHHNLTTGATLINEQWLLTTAK	gi|186910296, gi|45580723, gi|4826762, gi|767989864, gi|767989866, gi|767989868	1548.54	N3H4F0S1G0	1058.24	4227.94	4	-2	8.3048	1.0264	N-linked glycosylation
19033	19036	67.7423	MVSHHNLTTGATLINEQWLLTTAK	gi|186910296, gi|45580723, gi|4826762, gi|767989864, gi|767989866, gi|767989868	2278.81	N5H6F0S1G0	1244.81	4974.2	4	-2	8.2662	0.57041	N-linked glycosylation
21932	21942	75.9178	MVSHHNLTTGATLINEQWLLTTAK	gi|186910296, gi|45580723, gi|4826762, gi|767989864, gi|767989866, gi|767989868	2204.77	N4H5F0S2G0	981.44	4900.16	5	-3	8.266	0.0030823	N-linked glycosylation
22829	22832	78.413	MVSHHNLTTGATLINEQWLLTTAK	gi|186910296, gi|45580723, gi|4826762, gi|767989864, gi|767989866, gi|767989868	2204.77	N4H5F0S2G0	978.042	4884.17	5	-2	8.2529	1.5607	N-linked glycosylation
18851	18853	67.2288	MVSHHNLTTGATLINEQWLLTTAK	gi|186910296, gi|45580723, gi|4826762, gi|767989864, gi|767989866, gi|767989868	2278.81	N5H6F0S1G0	1244.56	4974.2	4	-1	8.167	1.5394	N-linked glycosylation
6593	6595	32.7388	NLFLNHSENATAK	gi|186910296, gi|45580723, gi|4826762, gi|767989864, gi|767989866, gi|767989868	1913.68	N4H5F0S1G0	1124.81	3372.42	3	0	7.4121	1.5544	N-linked glycosylation
22452	22458	77.3623	MVSHHNLTTGATLINEQWLLTTAK	gi|186910296, gi|45580723, gi|4826762, gi|767989864, gi|767989866, gi|767989868	2204.77	N4H5F0S2G0	978.241	4884.16	5	-3	7.2966	-0.11336	N-linked glycosylation
25299	25301	85.3613	MVSHHNLTTGATLINEQWLLTTAK	gi|186910296, gi|45580723, gi|4826762, gi|767989864, gi|767989866, gi|767989868	2861	N5H6F0S3G0	1112.69	5556.39	5	-3	7.2182	0.84856	N-linked glycosylation
16706	16718	61.23	MVSHHNLTTGATLINEQWLLTTAK	gi|186910296, gi|45580723, gi|4826762, gi|767989864, gi|767989866, gi|767989868	1954.7	N5H4F0S1G0	931.225	4650.09	5	-2	7.144	-0.76873	N-linked glycosylation
19358	19360	68.6538	MVSHHNLTTGATLINEQWLLTTAK	gi|186910296, gi|45580723, gi|4826762, gi|767989864, gi|767989866, gi|767989868	2245.8	N5H4F0S2G0	989.447	4941.2	5	-2	7.1272	1.8454	N-linked glycosylation
18799	18802	67.0862	MVSHHNLTTGATLINEQWLLTTAK	gi|186910296, gi|45580723, gi|4826762, gi|767989864, gi|767989866, gi|767989868	2204.77	N4H5F0S2G0	978.44	4884.16	5	-4	7.1232	-1.85	N-linked glycosylation
16680	16682	61.1312	MVSHHNLTTGATLINEQWLLTTAK	gi|186910296, gi|45580723, gi|4826762, gi|767989864, gi|767989866, gi|767989868	1913.68	N4H5F0S1G0	920.023	4593.07	5	-3	7.102	0.90312	N-linked glycosylation
22244	22251	76.7833	MVSHHNLTTGATLINEQWLLTTAK	gi|186910296, gi|45580723, gi|4826762, gi|767989864, gi|767989866, gi|767989868	2569.9	N5H6F0S2G0	1050.87	5249.31	5	-1	6.2571	2.1266	N-linked glycosylation
22049	22052	76.2265	MVSHHNLTTGATLINEQWLLTTAK	gi|186910296, gi|45580723, gi|4826762, gi|767989864, gi|767989866, gi|767989868	2569.9	N5H6F0S2G0	1317.58	5265.3	4	-2	6.2492	1.0601	N-linked glycosylation
21347	21348	74.2492	MVSHHNLTTGATLINEQWLLTTAK	gi|186910296, gi|45580723, gi|4826762, gi|767989864, gi|767989866, gi|767989868	1913.68	N4H5F0S1G0	1149.77	4593.05	4	-3	6.2092	-4.7551	N-linked glycosylation
18981	18984	67.5967	MVSHHNLTTGATLINEQWLLTTAK	gi|186910296, gi|45580723, gi|4826762, gi|767989864, gi|767989866, gi|767989868	2245.8	N5H4F0S2G0	989.447	4941.2	5	-2	6.1077	1.9689	N-linked glycosylation
17642	17643	63.8337	MVSHHNLTTGATLINEQWLLTTAK	gi|186910296, gi|45580723, gi|4826762, gi|767989864, gi|767989866, gi|767989868	1954.7	N5H4F0S1G0	931.624	4650.07	5	-4	6.1012	-3.5636	N-linked glycosylation
16667	16669	61.0948	MVSHHNLTTGATLINEQWLLTTAK	gi|186910296, gi|45580723, gi|4826762, gi|767989864, gi|767989866, gi|767989868	1987.71	N5H6F0S0G0	1171.78	4683.1	4	-1	5.2711	-0.72351	N-linked glycosylation
19228	19231	68.29	MVSHHNLTTGATLINEQWLLTTAK	gi|186910296, gi|45580723, gi|4826762, gi|767989864, gi|767989866, gi|767989868	2278.81	N5H6F0S1G0	1244.56	4974.2	4	-1	5.2541	0.3614	N-linked glycosylation
16693	16700	61.1807	MVSHHNLTTGATLINEQWLLTTAK	gi|186910296, gi|45580723, gi|4826762, gi|767989864, gi|767989866, gi|767989868	1622.58	N4H5F0S0G0	1441	4317.97	3	-3	5.2432	1.1411	N-linked glycosylation
21893	21895	75.7868	MVSHHNLTTGATLINEQWLLTTAK	gi|186910296, gi|45580723, gi|4826762, gi|767989864, gi|767989866, gi|767989868	2569.9	N5H6F0S2G0	1054.47	5265.29	5	-3	5.2208	0.049644	N-linked glycosylation
21906	21908	75.8233	MVSHHNLTTGATLINEQWLLTTAK	gi|186910296, gi|45580723, gi|4826762, gi|767989864, gi|767989866, gi|767989868	1913.68	N4H5F0S1G0	1149.78	4593.08	4	-3	5.186	1.836	N-linked glycosylation
21529	21530	74.7598	MVSHHNLTTGATLINEQWLLTTAK	gi|186910296, gi|45580723, gi|4826762, gi|767989864, gi|767989866, gi|767989868	1913.68	N4H5F0S1G0	1149.77	4593.05	4	-3	5.1837	-4.7551	N-linked glycosylation
25754	25755	86.6405	MVSHHNLTTGATLINEQWLLTTAK	gi|186910296, gi|45580723, gi|4826762, gi|767989864, gi|767989866, gi|767989868	2861	N5H6F0S3G0	1109.29	5540.4	5	-2	5.1806	1.0674	N-linked glycosylation
11649	11650	46.9708	FSDGLESNSSTQFEVK	gi|178557739, gi|338858017, gi|356582273, gi|67190748, gi|768052592	1864.63	N2H9F0S0G0	1214.49	3639.45	3	-2	27.4472	0.017652	N-linked glycosylation
11740	11743	47.2313	FSDGLESNSSTQFEVK	gi|178557739, gi|338858017, gi|356582273, gi|67190748, gi|768052592	1702.58	N2H8F0S0G0	1160.47	3477.4	3	-2	16.3931	0.45859	N-linked glycosylation
11831	11832	47.483	FSDGLESNSSTQFEVK	gi|178557739, gi|338858017, gi|356582273, gi|67190748, gi|768052592	1864.63	N2H9F0S0G0	1214.49	3639.45	3	-2	15.4596	0.31952	N-linked glycosylation
19865	19866	70.0773	NTTCQDLQIEVTVK	gi|178557739, gi|338858017, gi|356582273, gi|67190748, gi|768052592	2204.77	N4H5F0S2G0	964.657	3853.6	4	-2	12.2163	0.96935	N-linked glycosylation
12208	12209	48.543	FSDGLESNSSTQFEVK	gi|178557739, gi|338858017, gi|356582273, gi|67190748, gi|768052592	1864.63	N2H9F0S0G0	1214.16	3639.45	3	-1	10.4142	1.9121	N-linked glycosylation
20047	20049	70.5927	NTTCQDLQIEVTVK	gi|178557739, gi|338858017, gi|356582273, gi|67190748, gi|768052592	2204.77	N4H5F0S2G0	964.406	3853.6	4	-1	10.3314	0.82626	N-linked glycosylation
19904	19906	70.1902	NTTCQDLQIEVTVK	gi|178557739, gi|338858017, gi|356582273, gi|67190748, gi|768052592	2204.77	N4H5F0S2G0	1285.87	3853.59	3	-2	10.3023	-0.61125	N-linked glycosylation
12013	12020	48.0105	FSDGLESNSSTQFEVK	gi|178557739, gi|338858017, gi|356582273, gi|67190748, gi|768052592	1864.63	N2H9F0S0G0	1213.82	3639.45	3	0	8.3711	0.48607	N-linked glycosylation
11558	11565	46.7313	FSDGLESNSSTQFEVK	gi|178557739, gi|338858017, gi|356582273, gi|67190748, gi|768052592	1702.58	N2H8F0S0G0	1159.81	3477.4	3	0	8.2819	2.2126	N-linked glycosylation
12065	12072	48.1563	FSDGLESNSSTQFEVK	gi|178557739, gi|338858017, gi|356582273, gi|67190748, gi|768052592	1216.42	N2H5F0S0G0	997.751	2991.24	3	0	8.1714	0.55674	N-linked glycosylation
15601	15604	58.0957	NTTCQDLQIEVTVK	gi|178557739, gi|338858017, gi|356582273, gi|67190748, gi|768052592	1913.68	N4H5F0S1G0	1188.51	3562.5	3	-1	7.2749	-0.21576	N-linked glycosylation
11909	11912	47.7083	NTTCQDLQIEVTVK	gi|178557739, gi|338858017, gi|356582273, gi|67190748, gi|768052592	1622.58	N4H5F0S0G0	1091.14	3271.4	3	0	7.2572	-0.75737	N-linked glycosylation
15640	15642	58.2028	NTTCQDLQIEVTVK	gi|178557739, gi|338858017, gi|356582273, gi|67190748, gi|768052592	1913.68	N4H5F0S1G0	891.631	3562.5	4	-1	6.2896	-0.90458	N-linked glycosylation
19969	19978	70.3912	NTTCQDLQIEVTVK	gi|178557739, gi|338858017, gi|356582273, gi|67190748, gi|768052592	2204.77	N4H5F0S2G0	1285.2	3853.59	3	0	6.2141	-0.35892	N-linked glycosylation
11454	11460	46.4363	FSDGLESNSSTQFEVK	gi|178557739, gi|338858017, gi|356582273, gi|67190748, gi|768052592	1864.63	N2H9F0S0G0	1214.49	3639.45	3	-2	5.3192	-0.08297	N-linked glycosylation
20086	20087	70.7003	NTTCQDLQIEVTVK	gi|178557739, gi|338858017, gi|356582273, gi|67190748, gi|768052592	2204.77	N4H5F0S2G0	1285.54	3853.59	3	-1	5.2828	-0.24751	N-linked glycosylation
20229	20231	71.1073	NTTCQDLQIEVTVK	gi|178557739, gi|338858017, gi|356582273, gi|67190748, gi|768052592	2204.77	N4H5F0S2G0	964.405	3853.59	4	-1	5.2816	-0.18741	N-linked glycosylation
24779	24785	83.911	LDAPTNLQFVNETDSTVLVR	gi|16933542, gi|47132549, gi|47132553, gi|47132555, gi|47132557, gi|530370025, gi|530370027, gi|530370029, gi|530370031, gi|530370033, gi|530370035, gi|530370037, gi|530370039, gi|530370041, gi|530370043, gi|530370045, gi|530370047, gi|530370049, gi|530370051, gi|530370053, gi|530370055, gi|530370057, gi|530370059, gi|530370061, gi|530370063, gi|530370065	1913.68	N4H5F0S1G0	1037.72	4145.83	4	-2	7.1794	1.1811	N-linked glycosylation
29043	29049	95.9203	LDAPTNLQFVNETDSTVLVR	gi|16933542, gi|47132549, gi|47132553, gi|47132555, gi|47132557, gi|530370025, gi|530370027, gi|530370029, gi|530370031, gi|530370033, gi|530370035, gi|530370037, gi|530370039, gi|530370041, gi|530370043, gi|530370045, gi|530370047, gi|530370049, gi|530370051, gi|530370053, gi|530370055, gi|530370057, gi|530370059, gi|530370061, gi|530370063, gi|530370065	2204.77	N4H5F0S2G0	1110.49	4436.92	4	-2	7.1295	-0.47879	N-linked glycosylation
29056	29059	95.949	LDAPTNLQFVNETDSTVLVR	gi|16933542, gi|47132549, gi|47132553, gi|47132555, gi|47132557, gi|530370025, gi|530370027, gi|530370029, gi|530370031, gi|530370033, gi|530370035, gi|530370037, gi|530370039, gi|530370041, gi|530370043, gi|530370045, gi|530370047, gi|530370049, gi|530370051, gi|530370053, gi|530370055, gi|530370057, gi|530370059, gi|530370061, gi|530370063, gi|530370065	2204.77	N4H5F0S2G0	1480.32	4436.93	3	-2	6.11	1.4774	N-linked glycosylation
4127	4132	25.0265	HEEGHMLNCTCFGQGR	gi|16933542, gi|47132547, gi|47132549, gi|47132553, gi|47132555, gi|47132557, gi|530370025, gi|530370027, gi|530370029, gi|530370031, gi|530370033, gi|530370035, gi|530370037, gi|530370039, gi|530370041, gi|530370043, gi|530370045, gi|530370047, gi|530370049, gi|530370051, gi|530370053, gi|530370055, gi|530370057, gi|530370059, gi|530370061, gi|530370063, gi|530370065	1913.68	N4H5F0S1G0	966.872	3862.46	4	-2	17.2388	-0.69838	N-linked glycosylation
6164	6169	31.5473	HEEGHMLNCTCFGQGR	gi|16933542, gi|47132547, gi|47132549, gi|47132553, gi|47132555, gi|47132557, gi|530370025, gi|530370027, gi|530370029, gi|530370031, gi|530370033, gi|530370035, gi|530370037, gi|530370039, gi|530370041, gi|530370043, gi|530370045, gi|530370047, gi|530370049, gi|530370051, gi|530370053, gi|530370055, gi|530370057, gi|530370059, gi|530370061, gi|530370063, gi|530370065	1913.68	N4H5F0S1G0	962.875	3846.47	4	-2	5.3375	0.51548	N-linked glycosylation
27392	27403	91.2795	SVQEIQATFFYFTPNK	gi|167857790, gi|4505529	1913.68	N4H5F0S1G0	959.912	3833.62	4	-3	5.1396	-4.0341	N-linked glycosylation
31877	31878	103.907	SVQEIQATFFYFTPNK	gi|167857790, gi|4505529	2935.04	N6H7F0S2G0	1215	4854.98	4	-2	5.1087	-2.1797	N-linked glycosylation
38104	38108	121.57	SDHGSSISCQPPAEIPGYLPADTVHLAVEFFNLTHLPANLLQGASK	gi|16418467	2204.77	N4H5F0S2G0	1422.45	7104.22	5	-4	15.2691	0.19973	N-linked glycosylation
38091	38095	121.534	SDHGSSISCQPPAEIPGYLPADTVHLAVEFFNLTHLPANLLQGASK	gi|16418467	2571.95	N5H6F4S0G0	1495.67	7471.33	5	-3	8.2554	-7.1907	N-linked glycosylation
25000	25002	84.522	VCQDCPLLAPLNDTR	gi|156523970	2204.77	N4H5F0S2G0	995.413	3976.62	4	-2	16.2136	0.48116	N-linked glycosylation
23726	23727	80.9302	AALAAFNAQNNGSNFQLEEISR	gi|156523970	1914.7	N4H5F2S0G0	1427.94	4279.81	3	-2	15.2541	-9.9559	N-linked glycosylation
19774	19775	69.8215	VCQDCPLLAPLNDTR	gi|156523970	1913.68	N4H5F0S1G0	1229.18	3685.53	3	0	14.2721	1.6978	N-linked glycosylation
25000	25001	84.5197	VCQDCPLLAPLNDTR	gi|156523970	2204.77	N4H5F0S2G0	1326.21	3976.62	3	0	14.228	0.69814	N-linked glycosylation
22205	22207	76.6613	AALAAFNAQNNGSNFQLEEISR	gi|156523970	1913.68	N4H5F0S1G0	1070.72	4278.84	4	-1	13.2834	1.6957	N-linked glycosylation
19813	19814	69.931	VCQDCPLLAPLNDTR	gi|156523970	1913.68	N4H5F0S1G0	922.639	3685.53	4	-2	13.2341	0.50316	N-linked glycosylation
27262	27264	90.8903	AALAAFNAQNNGSNFQLEEISR	gi|156523970	2205.79	N4H5F2S1G0	1143.98	4570.9	4	-2	12.1899	-9.5254	N-linked glycosylation
26378	26380	88.3987	AALAAFNAQNNGSNFQLEEISR	gi|156523970	2204.77	N4H5F0S2G0	1143.49	4569.92	4	-1	10.1548	-0.37611	N-linked glycosylation
28185	28186	93.485	AALAAFNAQNNGSNFQLEEISR	gi|156523970	2205.79	N4H5F2S1G0	1143.99	4570.91	4	-2	9.1448	-7.7094	N-linked glycosylation
27821	27822	92.4615	AALAAFNAQNNGSNFQLEEISR	gi|156523970	2205.79	N4H5F2S1G0	1143.98	4570.91	4	-2	9.1435	-8.1367	N-linked glycosylation
15601	15602	58.0905	VCQDCPLLAPLNDTR	gi|156523970	1622.58	N4H5F0S0G0	1132.15	3394.43	3	0	7.3088	0.92697	N-linked glycosylation
22010	22017	76.1278	AALAAFNAQNNGSNFQLEEISR	gi|156523970	1913.68	N4H5F0S1G0	1070.97	4278.83	4	-2	7.1939	-0.0013196	N-linked glycosylation
23518	23520	80.348	AALAAFNAQNNGSNFQLEEISR	gi|156523970	1914.7	N4H5F2S0G0	1427.61	4279.81	3	-1	7.1884	-8.7728	N-linked glycosylation
23050	23054	79.0377	AALAAFNAQNNGSNFQLEEISR	gi|156523970	1914.7	N4H5F2S0G0	1071.21	4279.82	4	-2	7.1581	-8.1905	N-linked glycosylation
23453	23458	80.1728	AALAAFNAQNNGSNFQLEEISR	gi|156523970	1913.68	N4H5F0S1G0	1070.71	4278.81	4	-1	7.125	-4.3525	N-linked glycosylation
22023	22026	76.1538	AALAAFNAQNNGSNFQLEEISR	gi|156523970	1913.68	N4H5F0S1G0	1427.62	4278.83	3	-2	6.1008	-0.083977	N-linked glycosylation
22686	22689	78.0093	AALAAFNAQNNGSNFQLEEISR	gi|156523970	1913.68	N4H5F0S1G0	1071.22	4278.83	4	-3	5.1142	-0.89949	N-linked glycosylation
23063	23066	79.0715	AALAAFNAQNNGSNFQLEEISR	gi|156523970	1914.7	N4H5F2S0G0	1427.95	4279.82	3	-2	5.1038	-7.9023	N-linked glycosylation
27860	27862	92.574	FSVATQTCQITPAEGPVVTAQYDCLGCVHPISTQSPDLEPILR	gi|156231037, gi|262050546, gi|4504893	656.228	N1H1F0S1G0	1354.39	5412.54	4	-2	9.2523	1.5508	O-linked glycosylation
25442	25445	85.7673	FSVATQTCQITPAEGPVVTAQYDCLGCVHPISTQSPDLEPILR	gi|156231037, gi|262050546, gi|4504893	365.132	N1H1F0S0G0	1281.87	5121.45	4	-3	9.2137	2.3549	O-linked glycosylation
4775	4776	27.6102	EETTVSPPHTSMAPAQDEER	gi|156231037	1021.36	N2H2F0S1G0	1084.12	3249.34	3	-1	13.2614	0.047767	O-linked glycosylation
7048	7051	34.0193	EETTVSPPHTSMAPAQDEER	gi|156231037	1312.46	N2H2F0S2G0	886.115	3540.43	4	-1	11.2163	-0.42574	O-linked glycosylation
7022	7025	33.9465	EETTVSPPHTSMAPAQDEER	gi|156231037	1312.46	N2H2F0S2G0	1181.48	3540.43	3	-2	7.2486	-0.92156	O-linked glycosylation
4835	4836	27.7777	EETTVSPPHTSMAPAQDEER	gi|156231037	1021.36	N2H2F0S1G0	813.34	3249.33	4	-1	6.1915	-1.3085	O-linked glycosylation
7152	7155	34.3127	EETTVSPPHTSMAPAQDEER	gi|156231037	1021.36	N2H2F0S1G0	1078.45	3233.35	3	0	6.1911	1.8158	O-linked glycosylation
7360	7364	34.9033	EETTVSPPHTSMAPAQDEER	gi|156231037	1021.36	N2H2F0S1G0	1079.12	3233.34	3	-2	5.196	0.49568	O-linked glycosylation
15705	15711	58.3958	TFVLSALQPSPTHSSSNTQR	gi|156119625, gi|261878614, gi|261878616, gi|261878618	656.228	N1H1F0S1G0	939.111	2814.31	3	-1	7.36	-1.1914	O-linked glycosylation
8582	8583	38.3418	LGNWSAMPSCK	gi|153266841	1913.68	N4H5F0S1G0	1060.75	3180.24	3	0	8.3028	1.3535	N-linked glycosylation
8400	8401	37.8277	LGNWSAMPSCK	gi|153266841	1913.68	N4H5F0S1G0	1060.75	3180.24	3	0	7.3068	0.66261	N-linked glycosylation
12598	12599	49.6388	LGNWSAMPSCK	gi|153266841	2204.77	N4H5F0S2G0	1157.79	3471.34	3	0	7.2755	2.3471	N-linked glycosylation
12871	12874	50.4115	LGNWSAMPSCK	gi|153266841	1913.68	N4H5F0S1G0	1055.42	3164.24	3	0	5.3812	0.17758	N-linked glycosylation
9257	9267	40.2648	LGNWSAMPSCK	gi|153266841	1622.58	N4H5F0S0G0	959.056	2873.14	3	-2	5.3474	-1.1618	N-linked glycosylation
4784	4785	27.6362	NHSCEPCQTLAVR	gi|145275213, gi|767938145, gi|767938147	1913.68	N4H5F0S1G0	1163.14	3485.38	3	-2	8.4074	0.048087	N-linked glycosylation
7282	7283	34.6752	NHSCEPCQTLAVR	gi|145275213, gi|767938145, gi|767938147	2204.77	N4H5F0S2G0	944.876	3776.48	4	0	7.3347	0.37881	N-linked glycosylation
4796	4797	27.6697	NHSCEPCQTLAVR	gi|145275213, gi|767938145, gi|767938147	1913.68	N4H5F0S1G0	872.352	3485.38	4	-1	6.3863	-0.078692	N-linked glycosylation
10947	10950	45.0027	LSDLSINSTECLHVHCR	gi|119392081, gi|530377645, gi|530377647, gi|578809101, gi|578809103, gi|767931844	1913.68	N4H5F0S1G0	989.918	3954.64	4	-2	6.2669	1.0617	N-linked glycosylation
13755	13756	52.8932	DLEITNATLQSEEDSR	gi|11641261, gi|194306629, gi|767936270	1913.68	N4H5F0S1G0	1246.18	3734.53	3	-2	5.2349	0.79327	N-linked glycosylation
12676	12682	49.871	TVLTPATNHMGNVTFTIPANR	gi|115298678	1378.48	N2H6F0S0G0	1217.22	3649.63	3	0	21.3098	0.47571	N-linked glycosylation
12780	12781	50.15	TVLTPATNHMGNVTFTIPANR	gi|115298678	1378.48	N2H6F0S0G0	1217.22	3649.63	3	0	17.3261	0.97742	N-linked glycosylation
15692	15694	58.349	TVLTPATNHMGNVTFTIPANR	gi|115298678	1378.48	N2H6F0S0G0	1212.22	3633.64	3	-1	16.3839	0.069891	N-linked glycosylation
12754	12755	50.0772	TVLTPATNHMGNVTFTIPANR	gi|115298678	1378.48	N2H6F0S0G0	913.164	3649.63	4	0	15.3364	0.50572	N-linked glycosylation
12585	12588	49.6077	TVLTPATNHMGNVTFTIPANR	gi|115298678	1378.48	N2H6F0S0G0	1217.22	3649.63	3	0	15.3039	0.97742	N-linked glycosylation
15705	15707	58.3853	TVLTPATNHMGNVTFTIPANR	gi|115298678	1378.48	N2H6F0S0G0	909.416	3633.64	4	-1	14.3695	0.066442	N-linked glycosylation
12533	12534	49.4562	TVLTPATNHMGNVTFTIPANR	gi|115298678	1540.53	N2H7F0S0G0	1271.23	3811.68	3	0	13.3544	-0.23426	N-linked glycosylation
12962	12971	50.6827	TVLTPATNHMGNVTFTIPANR	gi|115298678	1378.48	N2H6F0S0G0	1217.22	3649.63	3	0	11.4089	-0.22668	N-linked glycosylation
12832	12839	50.3122	TVLTPATNHMGNVTFTIPANR	gi|115298678	1216.42	N2H5F0S0G0	1163.2	3487.58	3	0	11.312	0.30662	N-linked glycosylation
15497	15506	57.8195	TVLTPATNHMGNVTFTIPANR	gi|115298678	1378.48	N2H6F0S0G0	1212.55	3633.64	3	-2	10.3781	1.599	N-linked glycosylation
12559	12564	49.5398	TVLTPATNHMGNVTFTIPANR	gi|115298678	1378.48	N2H6F0S0G0	913.165	3649.64	4	0	10.3573	1.7098	N-linked glycosylation
12884	12885	50.4427	TVLTPATNHMGNVTFTIPANR	gi|115298678	1216.42	N2H5F0S0G0	1163.53	3487.58	3	-1	10.2851	0.95475	N-linked glycosylation
12936	12944	50.6072	TVLTPATNHMGNVTFTIPANR	gi|115298678	1378.48	N2H6F0S0G0	913.415	3649.63	4	-1	9.4107	0.054759	N-linked glycosylation
15510	15517	57.8507	TVLTPATNHMGNVTFTIPANR	gi|115298678	1378.48	N2H6F0S0G0	909.165	3633.64	4	0	9.402	-0.08531	N-linked glycosylation
15809	15818	58.6967	TVLTPATNHMGNVTFTIPANR	gi|115298678	1378.48	N2H6F0S0G0	1211.88	3633.64	3	0	9.3213	-0.35062	N-linked glycosylation
12689	12693	49.9022	TVLTPATNHMGNVTFTIPANR	gi|115298678	1216.42	N2H5F0S0G0	1163.54	3487.59	3	-1	8.3907	3.7899	N-linked glycosylation
15445	15451	57.6655	TVLTPATNHMGNVTFTIPANR	gi|115298678	1540.53	N2H7F0S0G0	1266.57	3795.7	3	-2	8.3839	1.8994	N-linked glycosylation
12481	12485	49.3175	TVLTPATNHMGNVTFTIPANR	gi|115298678	1540.53	N2H7F0S0G0	954.179	3811.69	4	-2	8.3049	0.88443	N-linked glycosylation
15471	15478	57.7413	TVLTPATNHMGNVTFTIPANR	gi|115298678	1540.53	N2H7F0S0G0	950.179	3795.69	4	-2	7.441	-0.90186	N-linked glycosylation
15874	15877	58.8635	TVLTPATNHMGNVTFTIPANR	gi|115298678	1378.48	N2H6F0S0G0	1212.22	3633.63	3	-1	6.3308	-0.43403	N-linked glycosylation
12715	12721	49.9803	TVLTPATNHMGNVTFTIPANR	gi|115298678	1216.42	N2H5F0S0G0	873.152	3487.58	4	-2	6.3231	-0.18579	N-linked glycosylation
13170	13180	51.271	TVLTPATNHMGNVTFTIPANR	gi|115298678	1378.48	N2H6F0S0G0	913.664	3649.63	4	-2	6.1701	-1.6003	N-linked glycosylation
14847	14855	55.9865	TVLTPATNHMGNVTFTIPANR	gi|115298678	1378.48	N2H6F0S0G0	1217.88	3649.62	3	-2	5.1965	-2.5	N-linked glycosylation
9062	9065	39.7005	TVLTPATNHMGNVTFTIPANR	gi|115298678	1419.5	N3H5F0S0G0	923.673	3690.66	4	-1	5.1384	1.711	N-linked glycosylation
27535	27536	91.6558	ALPQPQNVTSLLGCTH	gi|11321561, gi|530395269	2204.77	N4H5F0S2G0	1314.89	3940.66	3	-2	17.2569	0.72226	N-linked glycosylation
18552	18554	66.3937	ALPQPQNVTSLLGCTH	gi|11321561, gi|530395269	1622.58	N4H5F0S0G0	1120.16	3358.47	3	0	16.3229	1.6834	N-linked glycosylation
22647	22648	77.8952	ALPQPQNVTSLLGCTH	gi|11321561, gi|530395269	1913.68	N4H5F0S1G0	1217.53	3649.56	3	-1	16.2986	1.7164	N-linked glycosylation
27561	27562	91.7292	ALPQPQNVTSLLGCTH	gi|11321561, gi|530395269	2204.77	N4H5F0S2G0	986.421	3940.65	4	-2	16.195	-0.086323	N-linked glycosylation
22686	22688	78.0067	ALPQPQNVTSLLGCTH	gi|11321561, gi|530395269	1913.68	N4H5F0S1G0	913.397	3649.56	4	-1	12.2561	1.0106	N-linked glycosylation
27366	27369	91.1857	ALPQPQNVTSLLGCTH	gi|11321561, gi|530395269	2204.77	N4H5F0S2G0	986.419	3940.64	4	-2	10.1602	-2.1308	N-linked glycosylation
23336	23339	79.8388	ALPQPQNVTSLLGCTH	gi|11321561, gi|530395269	1914.7	N4H5F2S0G0	1218.19	3650.54	3	-2	10.1417	-9.4392	N-linked glycosylation
22829	22831	78.4103	ALPQPQNVTSLLGCTH	gi|11321561, gi|530395269	1913.68	N4H5F0S1G0	1217.53	3649.56	3	-1	9.2487	0.91365	N-linked glycosylation
28289	28290	93.7773	ALPQPQNVTSLLGCTH	gi|11321561, gi|530395269	2205.79	N4H5F2S1G0	1314.55	3941.64	3	0	9.1111	-9.3786	N-linked glycosylation
27899	27900	92.6813	ALPQPQNVTSLLGCTH	gi|11321561, gi|530395269	2204.77	N4H5F0S2G0	1314.56	3940.65	3	-1	8.2266	-0.22307	N-linked glycosylation
14184	14185	54.1015	SWPAVGNCSSALR	gi|11321561, gi|530395269	1913.68	N4H5F0S1G0	1106.79	3318.35	3	0	7.3229	2.098	N-linked glycosylation
23531	23532	80.3818	ALPQPQNVTSLLGCTH	gi|11321561, gi|530395269	1914.7	N4H5F2S0G0	1217.52	3650.55	3	0	7.1054	-7.5678	N-linked glycosylation
28341	28343	93.926	ALPQPQNVTSLLGCTH	gi|11321561, gi|530395269	2205.79	N4H5F2S1G0	986.667	3941.64	4	-2	7.1014	-8.7303	N-linked glycosylation
14366	14367	54.6132	SWPAVGNCSSALR	gi|11321561, gi|530395269	1913.68	N4H5F0S1G0	1106.79	3318.35	3	0	6.3184	1.1048	N-linked glycosylation
14158	14159	54.0287	SWPAVGNCSSALR	gi|11321561, gi|530395269	2059.73	N4H5F1S1G0	1156.14	3464.41	3	-2	6.2643	0.30833	N-linked glycosylation
27717	27718	92.168	ALPQPQNVTSLLGCTH	gi|11321561, gi|530395269	2204.77	N4H5F0S2G0	1314.89	3940.65	3	-2	6.1983	0.25761	N-linked glycosylation
18539	18540	66.3548	SWPAVGNCSSALR	gi|11321561, gi|530395269	2350.83	N4H5F1S2G0	1252.51	3755.5	3	0	5.2422	0.98162	N-linked glycosylation
22452	22455	77.3545	ALPQPQNVTSLLGCTH	gi|11321561, gi|530395269	1913.68	N4H5F0S1G0	1217.53	3649.57	3	-1	5.1903	3.8236	N-linked glycosylation
22491	22495	77.4655	ALPQPQNVTSLLGCTH	gi|11321561, gi|530395269	1913.68	N4H5F0S1G0	913.396	3649.56	4	-1	5.1702	0.07402	N-linked glycosylation
27743	27744	92.2415	ALPQPQNVTSLLGCTH	gi|11321561, gi|530395269	2204.77	N4H5F0S2G0	985.918	3940.65	4	0	5.1407	-0.67595	N-linked glycosylation
6983	6984	33.8325	TPLPPTSAHGNVAEGETKPDPDVTER	gi|11321561, gi|530395269	1021.36	N2H2F0S1G0	935.177	3736.68	4	-1	29.2984	-0.18989	O-linked glycosylation
4114	4121	24.9963	TPLPPTSAHGNVAEGETKPDPDVTER	gi|11321561, gi|530395269	1095.4	N3H3F0S0G0	953.937	3810.72	4	-2	26.3218	-0.15252	O-linked glycosylation
9140	9141	39.9145	TPLPPTSAHGNVAEGETKPDPDVTER	gi|11321561, gi|530395269	1312.46	N2H2F0S2G0	1008.2	4027.78	4	-2	26.3051	-0.32769	O-linked glycosylation
6788	6791	33.2907	TPLPPTSAHGNVAEGETKPDPDVTER	gi|11321561, gi|530395269	1021.36	N2H2F0S1G0	934.927	3736.68	4	0	25.2836	-0.010776	O-linked glycosylation
5103	5104	28.5467	TPLPPTSAHGNVAEGETKPDPDVTER	gi|11321561, gi|530395269	730.264	N2H2F0S0G0	862.404	3445.59	4	-1	22.3226	0.20208	O-linked glycosylation
8958	8959	39.4018	TPLPPTSAHGNVAEGETKPDPDVTER	gi|11321561, gi|530395269	1312.46	N2H2F0S2G0	1008.2	4027.78	4	-2	22.3089	0.21784	O-linked glycosylation
4926	4927	28.0308	TPLPPTSAHGNVAEGETKPDPDVTER	gi|11321561, gi|530395269	730.264	N2H2F0S0G0	862.153	3445.59	4	0	20.3085	0.11291	O-linked glycosylation
7841	7843	36.2528	TPLPPTSAHGNVAEGETKPDPDVTER	gi|11321561, gi|530395269	656.228	N1H1F0S1G0	843.895	3371.55	4	-1	20.2914	0.54923	O-linked glycosylation
7841	7844	36.2555	TPLPPTSAHGNVAEGETKPDPDVTER	gi|11321561, gi|530395269	1677.59	N3H3F0S2G0	1099.49	4392.91	4	-2	17.3618	0.83934	O-linked glycosylation
9322	9323	40.4232	TPLPPTSAHGNVAEGETKPDPDVTER	gi|11321561, gi|530395269	1312.46	N2H2F0S2G0	1007.95	4027.78	4	-1	16.3086	1.1114	O-linked glycosylation
5773	5774	30.4365	TPLPPTSAHGNVAEGETKPDPDVTER	gi|11321561, gi|530395269	365.132	N1H1F0S0G0	770.87	3080.46	4	0	15.3192	0.56149	O-linked glycosylation
4741	4742	27.5015	TPLPPTSAHGNVAEGETKPDPDVTER	gi|11321561, gi|530395269	730.264	N2H2F0S0G0	862.153	3445.59	4	0	15.315	0.25462	O-linked glycosylation
7659	7660	35.7378	TPLPPTSAHGNVAEGETKPDPDVTER	gi|11321561, gi|530395269	656.228	N1H1F0S1G0	843.894	3371.55	4	-1	15.3077	-0.10247	O-linked glycosylation
5904	5905	30.8097	TPLPPTSAHGNVAEGETKPDPDVTER	gi|11321561, gi|530395269	1386.49	N3H3F0S1G0	1026.71	4101.81	4	-2	14.3705	-0.84155	O-linked glycosylation
5721	5722	30.2885	TPLPPTSAHGNVAEGETKPDPDVTER	gi|11321561, gi|530395269	1386.49	N3H3F0S1G0	1026.71	4101.81	4	-2	14.3632	0.11077	O-linked glycosylation
5956	5958	30.9593	TPLPPTSAHGNVAEGETKPDPDVTER	gi|11321561, gi|530395269	365.132	N1H1F0S0G0	771.371	3080.45	4	-2	12.3721	-0.031557	O-linked glycosylation
10011	10012	42.3662	TPLPPTSAHGNVAEGETKPDPDVTER	gi|11321561, gi|530395269	947.323	N1H1F0S2G0	916.669	3662.65	4	-1	12.2853	1.1216	O-linked glycosylation
7659	7661	35.7405	TPLPPTSAHGNVAEGETKPDPDVTER	gi|11321561, gi|530395269	1677.59	N3H3F0S2G0	1099.49	4392.92	4	-2	11.3698	1.3951	O-linked glycosylation
7347	7348	34.8588	TPLPPTSAHGNVAEGETKPDPDVTER	gi|11321561, gi|530395269	1021.36	N2H2F0S1G0	934.928	3736.69	4	0	11.2905	1.2306	O-linked glycosylation
5292	5294	29.0833	TPLPPTSAHGNVAEGETKPDPDVTER	gi|11321561, gi|530395269	730.264	N2H2F0S0G0	862.153	3445.59	4	0	10.3418	-0.028806	O-linked glycosylation
7529	7530	35.3717	TPLPPTSAHGNVAEGETKPDPDVTER	gi|11321561, gi|530395269	1021.36	N2H2F0S1G0	935.427	3736.68	4	-2	10.2786	-1.8064	O-linked glycosylation
6944	6948	33.7307	TPLPPTSAHGNVAEGETKPDPDVTER	gi|11321561, gi|530395269	1021.36	N2H2F0S1G0	1246.9	3736.68	3	-2	8.4116	-0.36565	O-linked glycosylation
7464	7468	35.197	TPLPPTSAHGNVAEGETKPDPDVTER	gi|11321561, gi|530395269	656.228	N1H1F0S1G0	843.894	3371.55	4	-1	8.3637	-0.60936	O-linked glycosylation
9504	9505	40.9353	TPLPPTSAHGNVAEGETKPDPDVTER	gi|11321561, gi|530395269	1312.46	N2H2F0S2G0	1008.46	4027.8	4	-3	8.2499	4.4765	O-linked glycosylation
7893	7896	36.402	TPLPPTSAHGNVAEGETKPDPDVTER	gi|11321561, gi|530395269	1022.38	N2H2F2S0G0	935.178	3737.69	4	0	8.2385	-4.2276	O-linked glycosylation
5578	5587	29.9062	TPLPPTSAHGNVAEGETKPDPDVTER	gi|11321561, gi|530395269	365.132	N1H1F0S0G0	771.119	3080.45	4	-1	7.3456	-1.7957	O-linked glycosylation
8023	8035	36.7918	TPLPPTSAHGNVAEGETKPDPDVTER	gi|11321561, gi|530395269	656.228	N1H1F0S1G0	843.645	3371.56	4	0	7.3194	1.6891	O-linked glycosylation
8997	9001	39.5198	TPLPPTSAHGNVAEGETKPDPDVTER	gi|11321561, gi|530395269	1312.46	N2H2F0S2G0	806.763	4027.78	5	-2	7.3046	-0.19442	O-linked glycosylation
8036	8041	36.8098	TPLPPTSAHGNVAEGETKPDPDVTER	gi|11321561, gi|530395269	1677.59	N3H3F0S2G0	1099.23	4392.91	4	-1	7.299	-0.28655	O-linked glycosylation
5474	5476	29.5967	TPLPPTSAHGNVAEGETKPDPDVTER	gi|11321561, gi|530395269	730.264	N2H2F0S0G0	862.652	3445.58	4	-2	7.2801	-3.1098	O-linked glycosylation
5435	5437	29.4865	TPLPPTSAHGNVAEGETKPD	gi|11321561, gi|530395269	1021.36	N2H2F0S1G0	1013.79	3039.35	3	0	7.2378	2.7304	O-linked glycosylation
6905	6917	33.6423	TPLPPTSAHGNVAEGETKPDPDVTER	gi|11321561, gi|530395269	365.132	N1H1F0S0G0	771.114	3080.43	4	-1	6.352	-8.3738	O-linked glycosylation
8088	8090	36.948	TPLPPTSAHGNVAEGETKPDPDVTER	gi|11321561, gi|530395269	1021.36	N2H2F0S1G0	935.676	3736.67	4	-3	6.26	-3.0309	O-linked glycosylation
9127	9129	39.8808	TPLPPTSAHGNVAEGETKPDPDVTER	gi|11321561, gi|530395269	1312.46	N2H2F0S2G0	1343.93	4027.78	3	-2	5.4367	0.34218	O-linked glycosylation
5656	5661	30.115	TPLPPTSAHGNVAEGETKPDPDVTER	gi|11321561, gi|530395269	730.264	N2H2F0S0G0	862.903	3445.58	4	-3	5.3108	-2.6664	O-linked glycosylation
4127	4134	25.0315	FVEGSHNSTVSLTTK	gi|105990532	1419.5	N3H5F0S0G0	1009.78	3026.31	3	-1	26.4196	0.073998	N-linked glycosylation
4127	4131	25.0242	FVEGSHNSTVSLTTK	gi|105990532	1622.58	N4H5F0S0G0	1077.47	3229.39	3	-1	24.4013	0.052532	N-linked glycosylation
4127	4139	25.0445	FVEGSHNSTVSLTTK	gi|105990532	1216.42	N2H5F0S0G0	942.082	2823.23	3	-1	22.4901	-1.3283	N-linked glycosylation
4140	4143	25.0573	FVEGSHNSTVSLTTK	gi|105990532	1257.45	N3H4F0S0G0	955.424	2864.26	3	0	17.4519	-0.11273	N-linked glycosylation
26573	26574	88.9485	VGQLQLSHNLSLVILVPQNLK	gi|105990532	1913.68	N4H5F0S1G0	1058.02	4227.05	4	-2	7.3425	2.5959	N-linked glycosylation
4140	4142	25.0547	FVEGSHNSTVSLTTK	gi|105990532	1581.56	N3H6F0S0G0	1063.46	3188.36	3	0	6.5254	0.37443	N-linked glycosylation
6242	6246	31.7628	FVEGSHNSTVSLTTK	gi|105990532	1710.6	N3H5F0S1G0	1106.81	3317.41	3	-1	6.4544	0.45325	N-linked glycosylation
6190	6192	31.6123	FVEGSHNSTVSLTTK	gi|105990532	1913.68	N4H5F0S1G0	1174.5	3520.48	3	-1	6.4002	-0.94061	N-linked glycosylation
24129	24130	82.0657	FEVDSPVYNATWSASLK	gi|105990532	1913.68	N4H5F0S1G0	1276.87	3827.6	3	-1	6.2429	-0.44934	N-linked glycosylation

## Sheet: PNGaseF_HILIC
PNGase F_HILIC: glycopeptides of human serum were treated with PNGase F, enriched by ZIC-HILIC and analyzed by LC-MS/MS. GPQuest was used to identify the intact glycopeptides.
MS1 Scan Number	MS2 Scan Number	Retention Time (mins)	Peptide Sequence	RafSeq accession number	Candidate Glycan Exact Mass	Candidate Glycan Composition	Precursor Mz	Precursor Mass	Precursor Charge	Mass Shift	PSM Score Morpheus	Matching Error in ppm	Glycosylation type annotation
22737	22740	76.8617	DIPTNSPELEETLTHTITK	gi|4504893	656.228	N1H1F0S1G0	932.776	2795.31	3	-1	15.2587	0.00527	O-linked glycosylation
9087	9096	39.4947	VEDLHVGATVAPSSR	gi|194018472	656.228	N1H1F0S1G0	732.013	2194.02	3	0	14.1019	-1.0222	O-linked glycosylation
7293	7300	34.5613	SCDTPPPCPR	gi|9857757	947.323	N1H1F0S2G0	711.946	2133.82	3	0	11.2693	0.71836	O-linked glycosylation
33176	33180	105.895	EPCVESLVSQYFQTVTDYGK	gi|4502149	656.228	N1H1F0S1G0	1002.78	3006.31	3	0	7.1441	-2.118	O-linked glycosylation
7800	7804	35.9572	TTPPTTATPIR	gi|530370065	365.132	N1H1F0S0G0	760.882	1520.76	2	0	6.2476	-8.6164	O-linked glycosylation
11661	11673	46.5025	TTPPTTATPIR	gi|530370065	656.228	N1H1F0S1G0	906.429	1811.85	2	0	5.2442	-8.4122	O-linked glycosylation
15236	15237	56.2217	KPTAIPK	gi|530421132	1532.55	N3H3F1S1G0	1144.02	2287.04	2	0	5.1427	2.0731	O-linked glycosylation
30667	30677	98.8985	NISDGFDGIPDNVDAALALPAHSYSGR	gi|88853069	2204.77	N4H5F0S2G0	1245.28	4977.09	4	-1	5.3252	-1.8783	N-linked glycosylation
7228	7235	34.3833	VATTVISK	gi|73858568, gi|73858570	1312.46	N2H2F0S2G0	1065.98	2130.95	2	0	6.6102	-0.38961	O-linked glycosylation
7202	7208	34.3092	VATTVISK	gi|73858568, gi|73858570	1312.46	N2H2F0S2G0	710.991	2130.96	3	0	6.3784	1.8959	O-linked glycosylation
21463	21474	73.3667	NLSMPLLPADFHK	gi|73858566	1913.68	N4H5F0S1G0	1133.16	3396.45	3	-1	10.2909	-1.0852	N-linked glycosylation
25792	25801	85.3297	NLSMPLLPADFHK	gi|73858566	2204.77	N4H5F0S2G0	1230.52	3687.55	3	-2	8.4297	-0.53606	N-linked glycosylation
20397	20409	70.4358	NLSMPLLPADFHK	gi|73858566	2204.77	N4H5F0S2G0	1235.19	3703.55	3	0	5.2821	0.34383	N-linked glycosylation
30342	30344	97.9682	FSEFWDLDPEVRPTSAVAA	gi|4557323	656.228	N1H1F0S1G0	931.756	2793.25	3	0	20.3195	0.76345	O-linked glycosylation
35576	35577	112.678	FSEFWDLDPEVRPTSAVAA	gi|4557323	947.323	N1H1F0S2G0	1029.12	3084.35	3	-1	16.3667	-0.11993	O-linked glycosylation
30524	30526	98.4795	FSEFWDLDPEVRPTSAVAA	gi|4557323	656.228	N1H1F0S1G0	931.756	2793.25	3	0	15.2926	0.56679	O-linked glycosylation
30329	30333	97.937	FSEFWDLDPEVRPTSAVAA	gi|4557323	673.243	N1H2F1S0G0	937.43	2810.27	3	0	14.3729	2.2427	O-linked glycosylation
25701	25710	85.0783	FSEFWDLDPEVRPTSAVAA	gi|4557323	365.132	N1H1F0S0G0	1252.08	2502.16	2	-1	13.4704	-0.23875	O-linked glycosylation
30147	30154	97.4353	FSEFWDLDPEVRPTSAVAA	gi|4557323	656.228	N1H1F0S1G0	931.759	2793.26	3	0	13.279	3.0578	O-linked glycosylation
25727	25730	85.1352	FSEFWDLDPEVRPTSAVAA	gi|4557323	365.132	N1H1F0S0G0	834.723	2502.15	3	0	13.2346	-1.4886	O-linked glycosylation
29952	29960	96.8927	FSEFWDLDPEVRPTSAVAA	gi|4557323	656.228	N1H1F0S1G0	931.755	2793.25	3	0	12.2859	-1.0065	O-linked glycosylation
25896	25903	85.6113	FSEFWDLDPEVRPTSAVAA	gi|4557323	365.132	N1H1F0S0G0	1252.08	2502.15	2	-1	11.4507	-4.5319	O-linked glycosylation
30485	30487	98.3703	FSEFWDLDPEVRPTSAVAA	gi|4557323	656.228	N1H1F0S1G0	1397.13	2793.25	2	0	9.5213	-0.47757	O-linked glycosylation
30719	30727	99.0377	FSEFWDLDPEVRPTSAVAA	gi|4557323	656.228	N1H1F0S1G0	931.754	2793.25	3	0	7.1101	-1.8587	O-linked glycosylation
30290	30301	97.8452	FSEFWDLDPEVRPTSAVAA	gi|4557323	656.228	N1H1F0S1G0	1397.63	2793.25	2	-1	6.4679	0.85609	O-linked glycosylation
23452	23462	78.8593	IPSCDSSPVSTEQLAPTAPPELTPVVQDCYHGDGQSYR	gi|4505881	656.228	N1H1F0S1G0	1205.04	4815.12	4	-2	18.2515	-1.4387	O-linked glycosylation
10257	10266	42.6848	SHAPEVITSSPL	gi|4503625	365.132	N1H1F0S0G0	802.392	1602.77	2	-1	12.4419	-1.6542	O-linked glycosylation
14222	14225	53.4477	HYTNPSQDVTVPCPVPSTPPTPSPSTPPTPSPSCCHPR	gi|31615935	1751.62	N4H4F0S1G0	1179.11	5888.5	5	-3	17.2137	-1.9675	O-linked glycosylation
14209	14212	53.4125	HYTNPSQDVTVPCPVPSTPPTPSPSTPPTPSPSCCHPR	gi|31615935	1751.62	N4H4F0S1G0	1473.63	5888.51	4	-3	16.2493	-1.385	O-linked glycosylation
15899	15900	58.0405	HYTNPSQDVTVPCPVPSTPPTPSPSTPPTPSPSCCHPR	gi|31615935	2042.72	N4H4F0S2G0	1546.41	6179.59	4	-3	15.2451	-2.6139	O-linked glycosylation
15873	15874	57.9688	HYTNPSQDVTVPCPVPSTPPTPSPSTPPTPSPSCCHPR	gi|31615935	2042.72	N4H4F0S2G0	1237.53	6179.6	5	-4	15.1847	-1.2427	O-linked glycosylation
12922	12927	49.9165	HYTNPSQDVTVPCPVPSTPPTPSPSTPPTPSPSCCHPR	gi|31615935	1298.48	N4H3F0S0G0	1360.35	5435.35	4	-3	14.2548	-2.2628	O-linked glycosylation
15678	15682	57.4398	HYTNPSQDVTVPCPVPSTPPTPSPSTPPTPSPSCCHPR	gi|31615935	2083.75	N5H3F0S2G0	1245.73	6220.63	5	-4	14.2533	-1.0365	O-linked glycosylation
12779	12791	49.5442	HYTNPSQDVTVPCPVPSTPPTPSPSTPPTPSPSCCHPR	gi|31615935	1095.4	N3H3F0S0G0	1309.83	5232.28	4	-4	14.2425	-0.50843	O-linked glycosylation
14677	14679	54.689	HYTNPSQDVTVPCPVPSTPPTPSPSTPPTPSPSCCHPR	gi|31615935	1589.57	N4H3F0S1G0	1146.5	5726.46	5	-2	14.2121	0.023628	O-linked glycosylation
12636	12641	49.1373	HYTNPSQDVTVPCPVPSTPPTPSPSTPPTPSPSCCHPR	gi|31615935	1501.56	N5H3F0S0G0	1411.37	5638.43	4	-4	13.2349	-2.0498	O-linked glycosylation
14677	14678	54.6865	HYTNPSQDVTVPCPVPSTPPTPSPSTPPTPSPSCCHPR	gi|31615935	1589.57	N4H3F0S1G0	1433.12	5726.45	4	-3	13.2342	-1.2422	O-linked glycosylation
14027	14038	52.9347	HYTNPSQDVTVPCPVPSTPPTPSPSTPPTPSPSCCHPR	gi|31615935	1751.62	N4H4F0S1G0	1179.31	5888.51	5	-4	13.2053	-0.19476	O-linked glycosylation
14001	14013	52.8665	HYTNPSQDVTVPCPVPSTPPTPSPSTPPTPSPSCCHPR	gi|31615935	1751.62	N4H4F0S1G0	1473.64	5888.52	4	-3	12.2358	1.3514	O-linked glycosylation
12064	12074	47.5928	HYTNPSQDVTVPCPVPSTPPTPSPSTPPTPSPSCCHPR	gi|31615935	1825.66	N5H5F0S0G0	1492.14	5962.55	4	-3	12.2302	-0.82454	O-linked glycosylation
11882	11889	47.089	HYTNPSQDVTVPCPVPSTPPTPSPSTPPTPSPSCCHPR	gi|31615935	1825.66	N5H5F0S0G0	1193.92	5962.54	5	-3	12.2078	-2.3416	O-linked glycosylation
14482	14489	54.169	HYTNPSQDVTVPCPVPSTPPTPSPSTPPTPSPSCCHPR	gi|31615935	1589.57	N4H3F0S1G0	1146.5	5726.45	5	-2	12.1811	-1.8949	O-linked glycosylation
14677	14686	54.7072	HYTNPSQDVTVPCPVPSTPPTPSPSTPPTPSPSCCHPR	gi|31615935	1751.62	N4H4F0S1G0	1473.64	5888.51	4	-3	11.2631	-1.3021	O-linked glycosylation
14417	14427	53.9988	HYTNPSQDVTVPCPVPSTPPTPSPSTPPTPSPSCCHPR	gi|31615935	1386.49	N3H3F0S1G0	1382.1	5523.38	4	-2	11.2421	-1.1568	O-linked glycosylation
13117	13129	50.461	HYTNPSQDVTVPCPVPSTPPTPSPSTPPTPSPSCCHPR	gi|31615935	1298.48	N4H3F0S0G0	1360.35	5435.36	4	-3	11.2334	-1.634	O-linked glycosylation
13247	13253	50.7968	HYTNPSQDVTVPCPVPSTPPTPSPSTPPTPSPSCCHPR	gi|31615935	933.344	N3H2F0S0G0	1268.81	5070.23	4	-2	11.2134	-0.92186	O-linked glycosylation
13403	13415	51.2347	HYTNPSQDVTVPCPVPSTPPTPSPSTPPTPSPSCCHPR	gi|31615935	1136.42	N4H2F0S0G0	1319.59	5273.32	4	-2	11.2117	0.72376	O-linked glycosylation
12493	12494	48.7365	HYTNPSQDVTVPCPVPSTPPTPSPSTPPTPSPSCCHPR	gi|31615935	1501.56	N5H3F0S0G0	1128.9	5638.44	5	-2	11.2083	-0.14764	O-linked glycosylation
12441	12452	48.6197	HYTNPSQDVTVPCPVPSTPPTPSPSTPPTPSPSCCHPR	gi|31615935	1501.56	N5H3F0S0G0	1411.12	5638.44	4	-3	10.2396	-0.58886	O-linked glycosylation
15899	15901	58.0432	HYTNPSQDVTVPCPVPSTPPTPSPSTPPTPSPSCCHPR	gi|31615935	2083.75	N5H3F0S2G0	1556.66	6220.62	4	-3	10.2162	-3.1051	O-linked glycosylation
12974	12986	50.0747	HYTNPSQDVTVPCPVPSTPPTPSPSTPPTPSPSCCHPR	gi|31615935	1339.5	N5H2F0S0G0	1370.36	5476.4	4	-2	10.2059	0.55326	O-linked glycosylation
12480	12491	48.7263	HYTNPSQDVTVPCPVPSTPPTPSPSTPPTPSPSCCHPR	gi|31615935	1460.53	N4H4F0S0G0	1401.11	5597.41	4	-4	10.145	-1.2382	O-linked glycosylation
14482	14485	54.1587	HYTNPSQDVTVPCPVPSTPPTPSPSTPPTPSPSCCHPR	gi|31615935	1589.57	N4H3F0S1G0	1433.37	5726.45	4	-4	9.2181	-2.2544	O-linked glycosylation
15704	15705	57.5042	HYTNPSQDVTVPCPVPSTPPTPSPSTPPTPSPSCCHPR	gi|31615935	2042.72	N4H4F0S2G0	1546.91	6179.59	4	-5	9.2055	-2.5145	O-linked glycosylation
16380	16392	59.3867	HYTNPSQDVTVPCPVPSTPPTPSPSTPPTPSPSCCHPR	gi|31615935	1677.59	N3H3F0S2G0	1164.3	5814.47	5	-3	9.1656	-2.2138	O-linked glycosylation
16237	16244	58.983	HYTNPSQDVTVPCPVPSTPPTPSPSTPPTPSPSCCHPR	gi|31615935	2043.74	N4H4F2S1G0	1237.73	6180.6	5	-4	9.1558	-5.4714	O-linked glycosylation
11856	11867	47.0285	HYTNPSQDVTVPCPVPSTPPTPSPSTPPTPSPSCCHPR	gi|31615935	1825.66	N5H5F0S0G0	1492.14	5962.53	4	-3	8.2851	-3.7726	O-linked glycosylation
14417	14426	53.9962	HYTNPSQDVTVPCPVPSTPPTPSPSTPPTPSPSCCHPR	gi|31615935	1751.62	N4H4F0S1G0	1473.88	5888.49	4	-4	8.2367	-3.5302	O-linked glycosylation
16211	16221	58.919	HYTNPSQDVTVPCPVPSTPPTPSPSTPPTPSPSCCHPR	gi|31615935	2043.74	N4H4F2S1G0	1546.66	6180.6	4	-3	6.1627	-4.9661	O-linked glycosylation
34073	34078	108.412	IEETTMTTQTPAPIQAPSAILPLPGQSVER	gi|262050538, gi|31542984	1312.46	N2H2F0S2G0	1123.78	4489.09	4	-3	9.5203	-3.4601	O-linked glycosylation
29835	29838	96.5537	IEETTMTTQTPAPIQAPSAILPLPGQSVER	gi|262050538, gi|31542984	656.228	N1H1F0S1G0	1278.63	3832.87	3	-1	9.5012	-2.442	O-linked glycosylation
29094	29098	94.4863	IEETTMTTQTPAPIQAPSAILPLPGQSVER	gi|262050538, gi|31542984	1005.36	N2H1F1S1G0	1050.76	4198	4	-2	8.4846	-2.395	O-linked glycosylation
29107	29117	94.5388	IEETTMTTQTPAPIQAPSAILPLPGQSVER	gi|262050538, gi|31542984	1005.36	N2H1F1S1G0	1400	4197.99	3	0	7.5868	-4.1086	O-linked glycosylation
33397	33406	106.53	IEETTMTTQTPAPIQAPSAILPLPGQSVER	gi|262050538, gi|31542984	1312.46	N2H2F0S2G0	1127.02	4505.06	4	0	7.5398	-8.1054	O-linked glycosylation
38561	38563	122.073	SVQEIQATFFYFTPNK	gi|167857790, gi|4505529	2861	N5H6F0S3G0	1196.75	4780.96	4	-3	6.1556	0.79898	N-linked glycosylation
18512	18513	65.2202	TVVQPSVGAAAGPVVPPCPGR	gi|156523970	656.228	N1H1F0S1G0	891.438	2672.3	3	0	26.5176	0.3834	O-linked glycosylation
15197	15203	56.127	TVVQPSVGAAAGPVVPPCPGR	gi|156523970	365.132	N1H1F0S0G0	794.738	2381.2	3	-1	23.5241	-2.5413	O-linked glycosylation
15002	15006	55.5898	TVVQPSVGAAAGPVVPPCPGR	gi|156523970	365.132	N1H1F0S0G0	794.405	2381.2	3	0	22.4954	-1.2606	O-linked glycosylation
18317	18323	64.6985	TVVQPSVGAAAGPVVPPCPGR	gi|156523970	656.228	N1H1F0S1G0	891.77	2672.29	3	-1	22.3799	-2.1967	O-linked glycosylation
15041	15052	55.7142	TVVQPSVGAAAGPVVPPCPGR	gi|156523970	365.132	N1H1F0S0G0	1191.1	2381.19	2	0	17.6963	-3.6391	O-linked glycosylation
26156	26159	86.3205	FSVATQTCQITPAEGPVVTAQYDCLGCVHPISTQSPDLEPILR	gi|156231037, gi|262050546, gi|4504893	365.132	N1H1F0S0G0	1281.87	5121.43	4	-3	13.2631	-2.1262	O-linked glycosylation
28704	28716	93.4183	FSVATQTCQITPAEGPVVTAQYDCLGCVHPISTQSPDLEPILR	gi|156231037, gi|262050546, gi|4504893	656.228	N1H1F0S1G0	1354.39	5412.54	4	-2	12.2862	1.6411	O-linked glycosylation
8567	8579	38.0752	SVSEINPTTQMK	gi|156231037	656.228	N1H1F0S1G0	996.45	1990.89	2	-1	9.4842	-0.79829	O-linked glycosylation
8749	8760	38.5727	SVSEINPTTQMK	gi|156231037	947.323	N1H1F0S2G0	766.664	2297.98	3	0	7.2219	-1.4075	O-linked glycosylation
16536	16538	59.7877	TFVLSALQPSPTHSSSNTQR	gi|156119625, gi|261878614, gi|261878616, gi|261878618	656.228	N1H1F0S1G0	938.778	2814.32	3	0	21.3296	0.73799	O-linked glycosylation
12597	12598	49.0217	TFVLSALQPSPTHSSSNTQR	gi|156119625, gi|261878614, gi|261878616, gi|261878618	365.132	N1H1F0S0G0	842.078	2523.22	3	-1	18.3965	-2.4892	O-linked glycosylation
16341	16348	59.2667	TFVLSALQPSPTHSSSNTQR	gi|156119625, gi|261878614, gi|261878616, gi|261878618	656.228	N1H1F0S1G0	939.114	2814.32	3	-1	17.3076	1.8665	O-linked glycosylation
12402	12408	48.5	TFVLSALQPSPTHSSSNTQR	gi|156119625, gi|261878614, gi|261878616, gi|261878618	365.132	N1H1F0S0G0	841.747	2523.22	3	0	16.3927	1.1868	O-linked glycosylation
7787	7797	35.9362	NHSCEPCQTLAVR	gi|145275213, gi|767938145, gi|767938147	2204.77	N4H5F0S2G0	945.375	3776.47	4	-2	8.27	-2.7555	N-linked glycosylation
7800	7805	35.9598	NHSCEPCQTLAVR	gi|145275213, gi|767938145, gi|767938147	2204.77	N4H5F0S2G0	1259.83	3776.47	3	-1	6.4301	-1.4759	N-linked glycosylation
8281	8283	37.2675	TPLPPTSAHGNVAEGETKPDPDVTER	gi|11321561, gi|530395269	656.228	N1H1F0S1G0	843.643	3371.55	4	0	25.2865	-0.70049	O-linked glycosylation
7644	7647	35.5222	TPLPPTSAHGNVAEGETKPDPDVTER	gi|11321561, gi|530395269	1021.36	N2H2F0S1G0	935.176	3736.68	4	-1	24.3014	-1.954	O-linked glycosylation
8476	8479	37.8027	TPLPPTSAHGNVAEGETKPDPDVTER	gi|11321561, gi|530395269	656.228	N1H1F0S1G0	843.893	3371.55	4	-1	22.2874	-1.2611	O-linked glycosylation
7449	7452	34.9828	TPLPPTSAHGNVAEGETKPDPDVTER	gi|11321561, gi|530395269	1021.36	N2H2F0S1G0	934.925	3736.68	4	0	20.3179	-1.3828	O-linked glycosylation
9854	9856	41.5717	TPLPPTSAHGNVAEGETKPDPDVTER	gi|11321561, gi|530395269	1312.46	N2H2F0S2G0	1008.2	4027.78	4	-2	19.3166	-0.69138	O-linked glycosylation
6097	6100	31.2612	TPLPPTSAHGNVAEGETKPDPDVTER	gi|11321561, gi|530395269	365.132	N1H1F0S0G0	770.866	3080.44	4	0	18.3227	-4.0353	O-linked glycosylation
5538	5542	29.7302	TPLPPTSAHGNVAEGETKPDPDVTER	gi|11321561, gi|530395269	730.264	N2H2F0S0G0	862.404	3445.59	4	-1	17.3464	0.20208	O-linked glycosylation
8671	8673	38.3353	TPLPPTSAHGNVAEGETKPDPDVTER	gi|11321561, gi|530395269	656.228	N1H1F0S1G0	843.642	3371.55	4	0	16.2577	-1.4246	O-linked glycosylation
8463	8465	37.7647	TPLPPTSAHGNVAEGETKPDPDVTER	gi|11321561, gi|530395269	656.228	N1H1F0S1G0	1124.86	3371.55	3	-1	14.4281	0.15468	O-linked glycosylation
6331	6339	31.9148	TPLPPTSAHGNVAEGETKPDPDVTER	gi|11321561, gi|530395269	365.132	N1H1F0S0G0	1028.15	3080.43	3	-2	13.4309	-8.6663	O-linked glycosylation
8086	8091	36.7413	TPLPPTSAHGNVAEGETKPDPDVTER	gi|11321561, gi|530395269	656.228	N1H1F0S1G0	843.894	3371.55	4	-1	13.31	0.25959	O-linked glycosylation
10491	10497	43.3143	TPLPPTSAHGNVAEGETKPDPDVTER	gi|11321561, gi|530395269	947.323	N1H1F0S2G0	916.667	3662.64	4	-1	13.3014	-0.87811	O-linked glycosylation
6136	6143	31.3787	TPLPPTSAHGNVAEGETKPDPDVTER	gi|11321561, gi|530395269	365.132	N1H1F0S0G0	1027.83	3080.46	3	-1	12.4561	2.4882	O-linked glycosylation
8268	8279	37.2548	TPLPPTSAHGNVAEGETKPDPDVTER	gi|11321561, gi|530395269	656.228	N1H1F0S1G0	1125.19	3371.54	3	-2	12.4356	-1.5645	O-linked glycosylation
9659	9668	41.0578	TPLPPTSAHGNVAEGETKPDPDVTER	gi|11321561, gi|530395269	1312.46	N2H2F0S2G0	1008.2	4027.77	4	-2	11.3523	-1.0551	O-linked glycosylation
7423	7428	34.9157	TPLPPTSAHGNVAEGETKPDPDVTER	gi|11321561, gi|530395269	365.132	N1H1F0S0G0	771.365	3080.43	4	-2	10.3687	-7.7193	O-linked glycosylation
8567	8576	38.0673	TPLPPTSAHGNVAEGETKPDPDVTER	gi|11321561, gi|530395269	1677.59	N3H3F0S2G0	1099.48	4392.91	4	-2	9.3637	-0.38333	O-linked glycosylation
7254	7265	34.4648	TPLPPTSAHGNVAEGETKPDPDVTER	gi|11321561, gi|530395269	1021.36	N2H2F0S1G0	935.177	3736.68	4	-1	9.3206	-0.45123	O-linked glycosylation
9230	9239	39.8878	TPLPPTSAHGNVAEGETKPDPDVTER	gi|11321561, gi|530395269	1312.46	N2H2F0S2G0	1008.45	4027.77	4	-3	8.3327	-2.0698	O-linked glycosylation
4147	4157	25.2122	TPLPPTSAHGNVAEGETKPDPDVTER	gi|11321561, gi|530395269	1095.4	N3H3F0S0G0	953.937	3810.72	4	-2	8.3131	-0.40878	O-linked glycosylation
7020	7030	33.8172	TPLPPTSAHGNVAEGETKPD	gi|11321561, gi|530395269	656.228	N1H1F0S1G0	892.742	2674.2	3	-2	8.2157	-2.6248	O-linked glycosylation
7618	7627	35.4655	TPLPPTSAHGNVAEGETKPDPDVTER	gi|11321561, gi|530395269	365.132	N1H1F0S0G0	771.617	3080.43	4	-3	8.1805	-6.6685	O-linked glycosylation
6409	6420	32.1373	TPLPPTSAHGNVAEGETKPDPDVTER	gi|11321561, gi|530395269	1386.49	N3H3F0S1G0	1026.46	4101.81	4	-1	6.2361	-1.095	O-linked glycosylation
4160	4170	25.2482	TPLPPTSAHGNVAEGETKPD	gi|11321561, gi|530395269	365.132	N1H1F0S0G0	795.044	2383.12	3	0	6.1662	0.61368	O-linked glycosylation
5759	5769	30.3538	TPLPPTSAHGNVAEGETKPDPDVTER	gi|11321561, gi|530395269	730.264	N2H2F0S0G0	862.403	3445.58	4	-1	5.2629	-0.86076	O-linked glycosylation
4499	4501	26.7757	TPLPPTSAHGNVAEGETKPD	gi|11321561, gi|530395269	365.132	N1H1F0S0G0	795.043	2383.11	3	0	5.158	-0.76934	O-linked glycosylation

## Sheet: PNGaseF_RAX
PNGase F_RAX: glycopeptides of human serum were treated with PNGase F, enriched by HyperSep™ Retain AX Cartridges and analyzed by LC-MS/MS. GPQuest was used to identify the intact glycopeptides.
MS1 Scan Number	MS2 Scan Number	Retention Time (mins)	Peptide Sequence	RafSeq accession number	Candidate Glycan Exact Mass	Candidate Glycan Composition	Precursor Mz	Precursor Mass	Precursor Charge	Mass Shift	PSM Score Morpheus	Matching Error in ppm	Glycosylation type annotation
30809	30815	101.714	NVSEDLPLPTFSPTLLGDSR	gi|169636439	2059.73	N4H5F1S1G0	1055.72	4217.85	4	-2	8.3472	3.216	N-linked glycosylation
32408	32411	106.209	EPCVESLVSQYFQTVTDYGK	gi|4502149	656.228	N1H1F0S1G0	1003.11	3006.32	3	-1	17.304	1.6183	O-linked glycosylation
7250	7251	35.5222	SCDTPPPCPR	gi|9857757	947.323	N1H1F0S2G0	711.947	2133.83	3	0	11.4396	2.5204	O-linked glycosylation
31550	31555	103.799	EPCVESLVSQYFQTVTDYGK	gi|4502149	656.228	N1H1F0S1G0	1003.11	3006.32	3	-1	10.2094	0.46106	O-linked glycosylation
8927	8931	40.2378	VEDLHVGATVAPSSR	gi|194018472	656.228	N1H1F0S1G0	732.013	2194.02	3	0	9.2902	-0.60487	O-linked glycosylation
4776	4777	28.0533	TEHLASSSEDSTTPSAQTQEK	gi|156231037	1312.46	N2H2F0S2G0	1183.16	3546.46	3	-1	7.4655	0.060096	O-linked glycosylation
4913	4914	28.5853	GQGEQGSTGGTNISSTSEPKEE	gi|221316614	656.228	N1H1F0S1G0	946.735	2836.18	3	-2	7.2307	-1.5121	N-linked glycosylation
35307	35308	114.416	EPCVESLVSQYFQTVTDYGK	gi|4502149	947.323	N1H1F0S2G0	1100.14	3297.4	3	-1	6.1969	-3.2452	O-linked glycosylation
13038	13041	51.8075	EGTPAPFGDQSHPEPESWNAAQHCQQDR	gi|221316614	947.323	N1H1F0S2G0	1031.92	4123.67	4	-1	6.11	-0.5516	O-linked glycosylation
5592	5595	30.7777	SAGSVESPSVSSTHR	gi|62243068	947.323	N1H1F0S2G0	812.349	2435.03	3	0	5.4112	-0.12669	O-linked glycosylation
5711	5715	31.1165	TTPPTTATPIR	gi|530370065	1021.36	N2H2F0S1G0	726.338	2177	3	0	5.3995	0.22732	O-linked glycosylation
8901	8905	40.1647	TTPPTTATPIR	gi|530370065	1312.46	N2H2F0S2G0	823.37	2468.09	3	0	5.3218	0.12549	O-linked glycosylation
14923	14932	57.1095	KPTAIPK	gi|530421132	1532.55	N3H3F1S1G0	763.019	2287.04	3	0	5.2412	3.1618	O-linked glycosylation
14936	14943	57.1407	KPTAIPK	gi|530421132	1532.55	N3H3F1S1G0	763.019	2287.04	3	0	5.2325	3.1618	O-linked glycosylation
7393	7400	35.939	GQGEQGSTGGTNISSTSEPKEE	gi|221316614	947.323	N1H1F0S2G0	1043.43	3127.27	3	-1	5.151	-5.1394	N-linked glycosylation
26779	26781	90.3777	NISDGFDGIPDNVDAALALPAHSYSGR	gi|88853069	1913.68	N4H5F0S1G0	1172.76	4686	4	-2	17.4869	0.87136	N-linked glycosylation
30029	30032	99.5148	NISDGFDGIPDNVDAALALPAHSYSGR	gi|88853069	2204.77	N4H5F0S2G0	996.624	4977.08	5	-2	17.3575	-2.7143	N-linked glycosylation
30185	30186	99.9467	NISDGFDGIPDNVDAALALPAHSYSGR	gi|88853069	2204.77	N4H5F0S2G0	1245.78	4977.09	4	-3	15.4551	-0.5776	N-linked glycosylation
29990	29993	99.4058	NISDGFDGIPDNVDAALALPAHSYSGR	gi|88853069	2204.77	N4H5F0S2G0	1245.03	4977.09	4	0	14.4793	-1.2043	N-linked glycosylation
26662	26666	90.0538	NISDGFDGIPDNVDAALALPAHSYSGR	gi|88853069	1913.68	N4H5F0S1G0	938.811	4686.01	5	-4	12.3648	1.6641	N-linked glycosylation
33630	33633	109.661	NISDGFDGIPDNVDAALALPAHSYSGR	gi|88853069	3007.06	N5H6F1S3G0	1157.29	5779.39	5	-3	12.342	2.3135	N-linked glycosylation
26623	26629	89.9492	NISDGFDGIPDNVDAALALPAHSYSGR	gi|88853069	1913.68	N4H5F0S1G0	1563.67	4685.99	3	-3	7.4624	-1.978	N-linked glycosylation
30016	30024	99.4917	NISDGFDGIPDNVDAALALPAHSYSGR	gi|88853069	2204.77	N4H5F0S2G0	1660.37	4977.08	3	-2	7.4135	-2.5744	N-linked glycosylation
23607	23611	81.4725	NISDGFDGIPDNVDAALALPAHSYSGR	gi|88853069	1622.58	N4H5F0S0G0	1099.99	4394.91	4	-2	7.3996	1.9711	N-linked glycosylation
26584	26588	89.8345	NISDGFDGIPDNVDAALALPAHSYSGR	gi|88853069	1913.68	N4H5F0S1G0	1172.76	4686	4	-2	7.3446	-1.0042	N-linked glycosylation
30367	30368	100.457	NISDGFDGIPDNVDAALALPAHSYSGR	gi|88853069	2204.77	N4H5F0S2G0	1245.53	4977.09	4	-2	7.3162	-1.3751	N-linked glycosylation
26259	26265	88.9268	NISDGFDGIPDNVDAALALPAHSYSGR	gi|88853069	2424.87	N5H6F1S1G0	1300.81	5197.19	4	-3	6.3082	0.015679	N-linked glycosylation
29821	29826	98.9363	NISDGFDGIPDNVDAALALPAHSYSGR	gi|88853069	2715.96	N5H6F1S2G0	1098.87	5488.29	5	-2	6.2276	0.38992	N-linked glycosylation
17094	17095	63.1792	NGSLFAFR	gi|88853069	1913.68	N4H5F0S1G0	942.39	2825.15	3	0	5.325	0.90354	N-linked glycosylation
22788	22800	79.1963	NGSLFAFR	gi|88853069	2204.77	N4H5F0S2G0	1039.42	3116.25	3	0	5.3091	1.8761	N-linked glycosylation
10334	10336	44.2127	AQASSVPTAQPQAEGSLAK	gi|82407641	656.228	N1H1F0S1G0	833.062	2497.17	3	0	17.435	0.40912	O-linked glycosylation
12895	12899	51.4095	AQASSVPTAQPQAEGSLAK	gi|82407641	947.323	N1H1F0S2G0	930.427	2788.26	3	-1	13.4428	-0.39973	O-linked glycosylation
9212	9213	41.055	AQASSVPTAQPQAEGSLAK	gi|82407641	1021.36	N2H2F0S1G0	954.772	2862.3	3	0	8.4979	-0.13277	O-linked glycosylation
11491	11494	47.4675	AQASSVPTAQPQAEGSLAK	gi|82407641	1312.46	N2H2F0S2G0	1052.14	3153.4	3	-1	7.4571	2.628	O-linked glycosylation
11686	11691	48.0213	AQASSVPTAQPQAEGSLAK	gi|82407641	1312.46	N2H2F0S2G0	1052.14	3153.4	3	-1	6.4796	0.88598	O-linked glycosylation
8290	8294	38.4507	AQASSVPTAQPQAEGSLAK	gi|82407641	1021.36	N2H2F0S1G0	955.105	2862.3	3	-1	6.4675	-1.2622	O-linked glycosylation
9031	9035	40.531	AQASSVPTAQPQAEGSLAK	gi|82407641	1021.36	N2H2F0S1G0	955.107	2862.3	3	-1	6.4454	0.20914	O-linked glycosylation
10214	10219	43.879	AQASSVPTAQPQAEGSLAK	gi|82407641	656.228	N1H1F0S1G0	833.062	2497.17	3	0	6.4341	1.1424	O-linked glycosylation
6271	6275	32.7625	AQASSVPTAQPQAEGSLAK	gi|82407641	730.264	N2H2F0S0G0	858.074	2571.2	3	-1	5.3926	-0.62095	O-linked glycosylation
7042	7052	34.9638	AQASSVPTAQPQAEGSLAK	gi|82407641	365.132	N1H1F0S0G0	736.364	2206.07	3	-1	5.3664	-0.50336	O-linked glycosylation
11673	11680	47.9898	TQNFTLLVQGSPELK	gi|767931868, gi|767931870, gi|767931872, gi|767931874, gi|767931876, gi|78191798	1913.68	N4H5F0S1G0	1196.86	3588.56	3	0	5.1284	-6.618	N-linked glycosylation
7003	7006	34.8368	VATTVISK	gi|73858568, gi|73858570	1312.46	N2H2F0S2G0	710.99	2130.95	3	0	7.3927	0.091422	O-linked glycosylation
6694	6697	33.9688	VATTVISK	gi|73858568, gi|73858570	1312.46	N2H2F0S2G0	710.99	2130.95	3	0	6.4612	-0.33821	O-linked glycosylation
6681	6684	33.9325	VATTVISK	gi|73858568, gi|73858570	1312.46	N2H2F0S2G0	1065.98	2130.95	2	0	5.6049	-2.1081	O-linked glycosylation
7003	7012	34.8523	VATTVISK	gi|73858568, gi|73858570	1312.46	N2H2F0S2G0	1065.98	2130.95	2	0	5.5943	-1.6499	O-linked glycosylation
16002	16003	60.1125	NLSMPLLPADFHK	gi|73858566	1913.68	N4H5F0S1G0	1138.16	3412.45	3	0	15.361	1.1786	N-linked glycosylation
19941	19942	71.1788	NLSMPLLPADFHK	gi|73858566	2204.77	N4H5F0S2G0	926.644	3703.55	4	0	15.3344	1.6259	N-linked glycosylation
21072	21073	74.353	NLSMPLLPADFHK	gi|73858566	1913.68	N4H5F0S1G0	1132.82	3396.46	3	0	13.4631	0.19009	N-linked glycosylation
25323	25325	86.2873	NLSMPLLPADFHK	gi|73858566	2204.77	N4H5F0S2G0	922.644	3687.55	4	0	13.3944	0.3863	N-linked glycosylation
16028	16029	60.1853	NLSMPLLPADFHK	gi|73858566	1913.68	N4H5F0S1G0	854.12	3412.45	4	-1	12.4133	0.47802	N-linked glycosylation
25323	25324	86.2847	NLSMPLLPADFHK	gi|73858566	2204.77	N4H5F0S2G0	1229.85	3687.55	3	0	12.4066	-0.5703	N-linked glycosylation
19785	19788	70.7462	NLSMPLLPADFHK	gi|73858566	2204.77	N4H5F0S2G0	1235.85	3703.54	3	-2	11.3369	-1.5008	N-linked glycosylation
21098	21108	74.4497	NLSMPLLPADFHK	gi|73858566	1913.68	N4H5F0S1G0	1132.82	3396.46	3	0	10.4261	0.83702	N-linked glycosylation
25505	25509	86.8037	NLSMPLLPADFHK	gi|73858566	2204.77	N4H5F0S2G0	923.144	3687.55	4	-2	10.3273	-1.1684	N-linked glycosylation
21254	21257	74.869	NLSMPLLPADFHK	gi|73858566	1913.68	N4H5F0S1G0	1132.82	3396.46	3	0	9.3712	0.62137	N-linked glycosylation
19980	19981	71.2887	NLSMPLLPADFHK	gi|73858566	2204.77	N4H5F0S2G0	1235.52	3703.55	3	-1	9.339	0.064231	N-linked glycosylation
19837	19848	70.9128	NLSMPLLPADFHK	gi|73858566	2204.77	N4H5F0S2G0	741.515	3703.55	5	0	9.2619	0.10634	N-linked glycosylation
17471	17474	64.2447	NLSMPLLPADFHK	gi|73858566	1622.58	N4H5F0S0G0	1035.79	3105.36	3	0	8.5212	-0.32211	N-linked glycosylation
12674	12686	50.8097	NLSMPLLPADFHK	gi|73858566	1622.58	N4H5F0S0G0	781.345	3121.35	4	-1	8.3935	-0.66954	N-linked glycosylation
25128	25140	85.7662	NLSMPLLPADFHK	gi|73858566	2204.77	N4H5F0S2G0	923.396	3687.55	4	-3	8.3881	0.63628	N-linked glycosylation
20123	20125	71.6935	NLSMPLLPADFHK	gi|73858566	2204.77	N4H5F0S2G0	926.642	3703.55	4	0	8.3459	0.10972	N-linked glycosylation
20162	20165	71.8055	NLSMPLLPADFHK	gi|73858566	2204.77	N4H5F0S2G0	1235.52	3703.55	3	-1	8.3425	-0.03465	N-linked glycosylation
20890	20894	73.851	NLSMPLLPADFHK	gi|73858566	1913.68	N4H5F0S1G0	1132.82	3396.45	3	0	8.2375	-0.13338	N-linked glycosylation
25193	25200	85.9357	NLSMPLLPADFHK	gi|73858566	2204.77	N4H5F0S2G0	738.717	3687.55	5	-2	7.4189	-0.50975	N-linked glycosylation
16184	16186	60.6272	NLSMPLLPADFHK	gi|73858566	1913.68	N4H5F0S1G0	1138.49	3412.45	3	-1	7.3699	1.1971	N-linked glycosylation
15833	15836	59.6445	NLSMPLLPADFHK	gi|73858566	1913.68	N4H5F0S1G0	854.12	3412.45	4	-1	6.3681	0.69265	N-linked glycosylation
12609	12612	50.6038	NLSMPLLPADFHK	gi|73858566	1622.58	N4H5F0S0G0	1041.79	3121.36	3	-2	6.3585	1.0363	N-linked glycosylation
16210	16211	60.6978	NLSMPLLPADFHK	gi|73858566	1913.68	N4H5F0S1G0	854.376	3412.47	4	-2	6.2388	7.007	N-linked glycosylation
24946	24951	85.2365	NLSMPLLPADFHK	gi|73858566	2569.9	N5H6F0S2G0	1014.43	4052.69	4	-2	6.2038	2.2206	N-linked glycosylation
17276	17280	63.6997	NLSMPLLPADFHK	gi|73858566	1622.58	N4H5F0S0G0	1036.12	3105.35	3	-1	5.4495	-1.8349	N-linked glycosylation
15807	15816	59.5872	NLSMPLLPADFHK	gi|73858566	1913.68	N4H5F0S1G0	1138.49	3412.45	3	-1	5.3451	0.76787	N-linked glycosylation
19603	19606	70.2357	NLSMPLLPADFHK	gi|73858566	2569.9	N5H6F0S2G0	1018.18	4068.68	4	-1	5.3292	0.80598	N-linked glycosylation
25037	25043	85.4945	NLSMPLLPADFHK	gi|73858566	2350.83	N4H5F1S2G0	959.66	3833.61	4	-2	5.3249	0.39443	N-linked glycosylation
12804	12811	51.1615	NLSMPLLPADFHK	gi|73858566	1622.58	N4H5F0S0G0	1041.46	3121.36	3	-1	5.3237	0.4295	N-linked glycosylation
15599	15607	59.0003	NLSMPLLPADFHK	gi|73858566	2278.81	N5H6F0S1G0	945.401	3777.58	4	-1	5.3199	-0.82788	N-linked glycosylation
18303	18307	66.5838	NLSMPLLPADFHK	gi|73858566	1913.68	N4H5F0S1G0	1138.82	3412.45	3	-2	5.303	-0.50143	N-linked glycosylation
21943	21946	76.7992	NLSMPLLPADFHK	gi|73858566	2204.77	N4H5F0S2G0	927.142	3703.54	4	-2	5.3021	-1.8338	N-linked glycosylation
21748	21754	76.2595	NLSMPLLPADFHK	gi|73858566	2204.77	N4H5F0S2G0	927.142	3703.54	4	-2	5.2734	-2.3612	N-linked glycosylation
30081	30088	99.6708	NLSMPLLPADFHK	gi|73858566	2861	N5H6F0S3G0	1449.27	4343.79	3	-2	5.2579	1.6667	N-linked glycosylation
19980	19985	71.299	NLSMPLLPADFHK	gi|73858566	2350.83	N4H5F1S2G0	963.659	3849.6	4	-2	5.2331	0.19173	N-linked glycosylation
15859	15870	59.7382	NLSMPLLPADFHK	gi|73858566	2059.73	N4H5F1S1G0	1186.84	3558.51	3	0	5.1983	0.87926	N-linked glycosylation
11543	11552	47.629	SPDESTPELSAEPTPK	gi|735997420, gi|735997422, gi|735997424, gi|735997426, gi|735997428	656.228	N1H1F0S1G0	781.346	2341.02	3	-1	7.2141	0.4071	O-linked glycosylation
13506	13513	53.1307	SPDESTPELSAEPTPK	gi|735997420, gi|735997422, gi|735997424, gi|735997426, gi|735997428	1312.46	N2H2F0S2G0	999.754	2997.25	3	0	5.1589	-0.29361	O-linked glycosylation
18368	18379	66.7853	FVSVTCDFFESQAPATGSENSAVNQKPTNLPK	gi|530374400, gi|530374402, gi|58331240, gi|767926380, gi|767926383, gi|767926386, gi|767926388	365.132	N1H1F0S0G0	960.204	3835.79	4	-2	8.2059	0.1158	O-linked glycosylation
18394	18398	66.8402	FVSVTCDFFESQAPATGSENSAVNQKPTNLPK	gi|530374400, gi|530374402, gi|58331240, gi|767926380, gi|767926383, gi|767926386, gi|767926388	365.132	N1H1F0S0G0	1279.26	3835.78	3	0	5.1944	-2.2052	O-linked glycosylation
21241	21244	74.8327	FVSVTCDFFESQAPATGSENSAVNQKPTNLPK	gi|530374400, gi|530374402, gi|58331240, gi|767926380, gi|767926383, gi|767926386, gi|767926388	656.228	N1H1F0S1G0	1376.63	4126.88	3	-1	5.1835	-0.74814	O-linked glycosylation
18368	18378	66.7828	AATVGSLAGQPLQER	gi|4557325, gi|705044002, gi|705044063, gi|705044104, gi|705044152	947.323	N1H1F0S2G0	815.714	2445.13	3	0	10.4616	0.17168	O-linked glycosylation
13493	13504	53.1048	VQAAVGTSAAPVPSDNH	gi|4557325, gi|705044002, gi|705044063, gi|705044104, gi|705044152	947.323	N1H1F0S2G0	857.046	2568.12	3	-1	8.3452	-0.32528	O-linked glycosylation
18056	18064	65.9002	AATVGSLAGQPLQER	gi|4557325, gi|705044002, gi|705044063, gi|705044104, gi|705044152	1312.46	N2H2F0S2G0	937.758	2810.26	3	-1	7.5466	-0.65271	O-linked glycosylation
10266	10273	44.0312	VQAAVGTSAAPVPSDNH	gi|4557325, gi|705044002, gi|705044063, gi|705044104, gi|705044152	656.228	N1H1F0S1G0	760.014	2277.02	3	-1	6.446	-1.1701	O-linked glycosylation
13129	13133	52.0655	AATVGSLAGQPLQER	gi|4557325, gi|705044002, gi|705044063, gi|705044104, gi|705044152	1021.36	N2H2F0S1G0	840.392	2519.16	3	0	6.2325	-0.67969	O-linked glycosylation
10477	10483	44.6263	VQAAVGTSAAPVPSDNH	gi|4557325, gi|705044002, gi|705044063, gi|705044104, gi|705044152	656.228	N1H1F0S1G0	759.68	2277.02	3	0	5.438	-0.71535	O-linked glycosylation
32226	32230	105.7	DKFSEFWDLDPEVRPTSAVAA	gi|4557323	947.323	N1H1F0S2G0	1110.17	3327.49	3	-1	19.2685	5.7345	O-linked glycosylation
34748	34749	112.831	FSEFWDLDPEVRPTSAVAA	gi|4557323	947.323	N1H1F0S2G0	1029.12	3084.35	3	-1	18.3373	1.4236	O-linked glycosylation
29912	29913	99.1822	FSEFWDLDPEVRPTSAVAA	gi|4557323	656.228	N1H1F0S1G0	931.757	2793.26	3	0	14.3559	1.3534	O-linked glycosylation
29431	29434	97.8345	FSEFWDLDPEVRPTSAVAA	gi|4557323	656.228	N1H1F0S1G0	932.425	2793.25	3	-2	13.3551	0.48089	O-linked glycosylation
29756	29768	98.772	FSEFWDLDPEVRPTSAVAA	gi|4557323	673.243	N1H2F1S0G0	937.764	2810.27	3	-1	11.3629	2.2001	O-linked glycosylation
34930	34931	113.348	FSEFWDLDPEVRPTSAVAA	gi|4557323	947.323	N1H1F0S2G0	1028.79	3084.37	3	0	10.3005	6.9835	O-linked glycosylation
9772	9779	42.6415	PEVRPTSAVAA	gi|4557323	947.323	N1H1F0S2G0	682.312	2044.92	3	0	8.4782	0.47525	O-linked glycosylation
29717	29720	98.6385	FSEFWDLDPEVRPTSAVAA	gi|4557323	656.228	N1H1F0S1G0	931.757	2793.25	3	0	8.2638	0.89455	O-linked glycosylation
34553	34558	112.287	FSEFWDLDPEVRPTSAVAA	gi|4557323	947.323	N1H1F0S2G0	1029.12	3084.35	3	-1	7.3332	2.136	O-linked glycosylation
29743	29746	98.712	FSEFWDLDPEVRPTSAVAA	gi|4557323	656.228	N1H1F0S1G0	1397.63	2793.25	2	-1	6.4269	-2.2904	O-linked glycosylation
34605	34608	112.43	FSEFWDLDPEVRPTSAVAA	gi|4557323	947.323	N1H1F0S2G0	1543.18	3084.35	2	-1	5.4615	-0.2346	O-linked glycosylation
22957	22958	79.6413	IPSCDSSPVSTEQLAPTAPPELTPVVQDCYHGDGQSYR	gi|4505881	656.228	N1H1F0S1G0	1204.54	4815.13	4	0	28.2768	0.96879	O-linked glycosylation
22814	22817	79.2455	IPSCDSSPVSTEQLAPTAPPELTPVVQDCYHGDGQSYR	gi|4505881	673.243	N1H2F1S0G0	1209.3	4832.16	4	-2	20.2607	2.1703	O-linked glycosylation
20877	20879	73.8095	IPSCDSSPVSTEQLAPTAPPELTPVVQDCYHGDGQSYR	gi|4505881	365.132	N1H1F0S0G0	1132.26	4524.03	4	-2	19.2503	-1.9221	O-linked glycosylation
23503	23504	81.1727	IPSCDSSPVSTEQLAPTAPPELTPVVQDCYHGDGQSYR	gi|4505881	656.228	N1H1F0S1G0	1205.29	4815.13	4	-3	17.2261	-0.20874	O-linked glycosylation
22827	22833	79.2897	IPSCDSSPVSTEQLAPTAPPELTPVVQDCYHGDGQSYR	gi|4505881	656.228	N1H1F0S1G0	964.439	4815.15	5	-3	13.1854	4.6688	O-linked glycosylation
23321	23322	80.6635	IPSCDSSPVSTEQLAPTAPPELTPVVQDCYHGDGQSYR	gi|4505881	656.228	N1H1F0S1G0	1205.29	4815.12	4	-3	12.1888	-2.6425	O-linked glycosylation
22801	22806	79.2143	IPSCDSSPVSTEQLAPTAPPELTPVVQDCYHGDGQSYR	gi|4505881	656.228	N1H1F0S1G0	1606.72	4815.12	3	-3	9.3351	-1.2709	O-linked glycosylation
22762	22767	79.1053	IPSCDSSPVSTEQLAPTAPPELTPVVQDCYHGDGQSYR	gi|4505881	656.228	N1H1F0S1G0	1205.29	4815.12	4	-3	9.2073	-1.8312	O-linked glycosylation
23139	23140	80.1518	IPSCDSSPVSTEQLAPTAPPELTPVVQDCYHGDGQSYR	gi|4505881	656.228	N1H1F0S1G0	1205.29	4815.12	4	-3	9.1614	-1.6284	O-linked glycosylation
20682	20687	73.2702	IPSCDSSPVSTEQLAPTAPPELTPVVQDCYHGDGQSYR	gi|4505881	365.132	N1H1F0S0G0	1132.52	4524.06	4	-3	7.1701	6.2946	O-linked glycosylation
20721	20724	73.3742	IPSCDSSPVSTEQLAPTAPPELTPVVQDCYHGDGQSYR	gi|4505881	365.132	N1H1F0S0G0	1509.68	4524.03	3	-3	6.2397	-1.7165	O-linked glycosylation
24101	24111	82.8757	IPSCDSSPVSTEQLAPTAPPELTPVVQDCYHGDGQSYR	gi|4505881	656.228	N1H1F0S1G0	1205.54	4815.11	4	-4	6.1933	-4.9617	O-linked glycosylation
23529	23536	81.2612	IPSCDSSPVSTEQLAPTAPPELTPVVQDCYHGDGQSYR	gi|4505881	673.243	N1H2F1S0G0	1209.29	4832.14	4	-2	5.1574	-0.25486	O-linked glycosylation
24946	24953	85.2417	IPSCDSSPVSTEQLAPTAPPELTPVVQDCYHGDGQSYR	gi|4505881	947.323	N1H1F0S2G0	1277.56	5106.21	4	-1	5.1405	-2.8397	O-linked glycosylation
17068	17070	63.1092	NFTENDLLVR	gi|4503635	1913.68	N4H5F0S1G0	1045.78	3134.31	3	-1	8.3959	1.0767	N-linked glycosylation
17250	17252	63.6212	NFTENDLLVR	gi|4503635	1913.68	N4H5F0S1G0	1045.78	3134.31	3	-1	7.374	1.4272	N-linked glycosylation
22021	22022	77.0133	NFTENDLLVR	gi|4503635	2204.77	N4H5F0S2G0	1142.81	3425.4	3	-1	7.3425	0.71732	N-linked glycosylation
12895	12898	51.407	NFTENDLLVR	gi|4503635	1622.58	N4H5F0S0G0	948.741	2843.2	3	-1	6.3452	-1.646	N-linked glycosylation
22372	22379	78.0143	NFTENDLLVR	gi|4503635	2204.77	N4H5F0S2G0	1142.47	3425.4	3	0	6.275	-1.0117	N-linked glycosylation
22398	22399	78.0722	NFTENDLLVR	gi|4503635	2204.77	N4H5F0S2G0	1142.81	3425.4	3	-1	6.2707	0.93114	N-linked glycosylation
21865	21870	76.5848	NFTENDLLVR	gi|4503635	2204.77	N4H5F0S2G0	857.106	3425.4	4	0	5.3613	-0.088781	N-linked glycosylation
17224	17229	63.5563	SHAPEVITSSPL	gi|4503625	947.323	N1H1F0S2G0	1092.99	2184.96	2	0	9.3014	-1.0207	O-linked glycosylation
5501	5506	30.5288	DANISQPETTKEGLR	gi|4502165	656.228	N1H1F0S1G0	772.693	2315.06	3	-1	8.4153	-1.1132	O-linked glycosylation
8459	8465	38.9292	DANISQPETTKEGLR	gi|4502165	947.323	N1H1F0S2G0	869.39	2606.15	3	0	8.3894	-1.1544	O-linked glycosylation
12583	12584	50.5257	HYTNPSQDVTVPCPVPSTPPTPSPSTPPTPSPSCCHPR	gi|31615935	1298.48	N4H3F0S0G0	1360.35	5435.37	4	-3	22.2234	-0.10679	O-linked glycosylation
17861	17868	65.349	HYTNPSQDVTVPCPVPSTPPTPSPSTPPTPSPSCCHPR	gi|31615935	2171.76	N4H3F0S3G0	1262.54	6308.65	5	0	21.2196	-0.52166	O-linked glycosylation
13844	13845	54.0608	HYTNPSQDVTVPCPVPSTPPTPSPSTPPTPSPSCCHPR	gi|31615935	1751.62	N4H4F0S1G0	1473.64	5888.51	4	-3	20.2371	-0.72161	O-linked glycosylation
12635	12636	50.6713	HYTNPSQDVTVPCPVPSTPPTPSPSTPPTPSPSCCHPR	gi|31615935	1460.53	N4H4F0S0G0	1400.86	5597.41	4	-3	20.2295	-1.3367	O-linked glycosylation
13051	13052	51.8387	HYTNPSQDVTVPCPVPSTPPTPSPSTPPTPSPSCCHPR	gi|31615935	1136.42	N4H2F0S0G0	1319.84	5273.31	4	-3	20.2263	-0.74579	O-linked glycosylation
14481	14482	55.8488	HYTNPSQDVTVPCPVPSTPPTPSPSTPPTPSPSCCHPR	gi|31615935	1224.44	N3H2F0S1G0	1341.59	5361.33	4	-2	20.2213	0.733	O-linked glycosylation
12349	12350	49.8693	HYTNPSQDVTVPCPVPSTPPTPSPSTPPTPSPSCCHPR	gi|31615935	1501.56	N5H3F0S0G0	1129.1	5638.44	5	-3	20.1932	-1.4354	O-linked glycosylation
15898	15900	59.8242	HYTNPSQDVTVPCPVPSTPPTPSPSTPPTPSPSCCHPR	gi|31615935	1677.59	N3H3F0S2G0	1164.11	5814.49	5	-2	20.1904	1.5543	O-linked glycosylation
15677	15678	59.2015	HYTNPSQDVTVPCPVPSTPPTPSPSTPPTPSPSCCHPR	gi|31615935	2042.72	N4H4F0S2G0	1546.41	6179.61	4	-3	19.2535	-0.55955	O-linked glycosylation
12505	12513	50.326	HYTNPSQDVTVPCPVPSTPPTPSPSTPPTPSPSCCHPR	gi|31615935	1095.4	N3H3F0S0G0	748.763	5232.28	7	-3	19.2452	-0.66767	O-linked glycosylation
14429	14430	55.7025	HYTNPSQDVTVPCPVPSTPPTPSPSTPPTPSPSCCHPR	gi|31615935	1589.57	N4H3F0S1G0	1433.37	5726.45	4	-4	19.2307	-1.4017	O-linked glycosylation
14117	14118	54.8258	HYTNPSQDVTVPCPVPSTPPTPSPSTPPTPSPSCCHPR	gi|31615935	1386.49	N3H3F0S1G0	1105.89	5523.39	5	-2	19.1956	1.3825	O-linked glycosylation
13597	13599	53.373	HYTNPSQDVTVPCPVPSTPPTPSPSTPPTPSPSCCHPR	gi|31615935	1751.62	N4H4F0S1G0	1179.11	5888.52	5	-3	19.1918	0.83103	O-linked glycosylation
15469	15470	58.6177	HYTNPSQDVTVPCPVPSTPPTPSPSTPPTPSPSCCHPR	gi|31615935	2042.72	N4H4F0S2G0	1237.33	6179.62	5	-3	19.1867	1.8089	O-linked glycosylation
13766	13767	53.8428	HYTNPSQDVTVPCPVPSTPPTPSPSTPPTPSPSCCHPR	gi|31615935	1751.62	N4H4F0S1G0	982.261	5888.53	6	0	19.1843	1.8747	O-linked glycosylation
13649	13651	53.5182	HYTNPSQDVTVPCPVPSTPPTPSPSTPPTPSPSCCHPR	gi|31615935	1751.62	N4H4F0S1G0	1473.64	5888.52	4	-3	18.2412	0.93681	O-linked glycosylation
14247	14248	55.1902	HYTNPSQDVTVPCPVPSTPPTPSPSTPPTPSPSCCHPR	gi|31615935	1589.57	N4H3F0S1G0	1433.12	5726.46	4	-3	18.2339	0.036841	O-linked glycosylation
14026	14027	54.5708	HYTNPSQDVTVPCPVPSTPPTPSPSTPPTPSPSCCHPR	gi|31615935	1751.62	N4H4F0S1G0	1473.63	5888.51	4	-3	18.2322	-1.385	O-linked glycosylation
15495	15496	58.6905	HYTNPSQDVTVPCPVPSTPPTPSPSTPPTPSPSCCHPR	gi|31615935	2042.72	N4H4F0S2G0	1546.41	6179.61	4	-3	18.23	0.2306	O-linked glycosylation
12323	12324	49.7963	HYTNPSQDVTVPCPVPSTPPTPSPSTPPTPSPSCCHPR	gi|31615935	1501.56	N5H3F0S0G0	1411.12	5638.44	4	-3	18.22	-0.93526	O-linked glycosylation
14572	14573	56.104	HYTNPSQDVTVPCPVPSTPPTPSPSTPPTPSPSCCHPR	gi|31615935	1427.52	N4H2F0S1G0	1392.36	5564.41	4	-2	18.2175	-0.48814	O-linked glycosylation
14559	14560	56.0677	HYTNPSQDVTVPCPVPSTPPTPSPSTPPTPSPSCCHPR	gi|31615935	1427.52	N4H2F0S1G0	1113.69	5564.41	5	0	18.1994	-0.51309	O-linked glycosylation
12752	12753	50.9998	HYTNPSQDVTVPCPVPSTPPTPSPSTPPTPSPSCCHPR	gi|31615935	1298.48	N4H3F0S0G0	1087.88	5435.37	5	0	18.1976	0.19294	O-linked glycosylation
14455	14457	55.778	HYTNPSQDVTVPCPVPSTPPTPSPSTPPTPSPSCCHPR	gi|31615935	1589.57	N4H3F0S1G0	1146.1	5726.47	5	0	18.1932	1.9201	O-linked glycosylation
13974	13975	54.4258	HYTNPSQDVTVPCPVPSTPPTPSPSTPPTPSPSCCHPR	gi|31615935	1751.62	N4H4F0S1G0	1178.51	5888.53	5	0	18.1914	2.5609	O-linked glycosylation
13792	13793	53.9153	HYTNPSQDVTVPCPVPSTPPTPSPSTPPTPSPSCCHPR	gi|31615935	1751.62	N4H4F0S1G0	1178.51	5888.53	5	0	18.1894	2.6646	O-linked glycosylation
14273	14274	55.2635	HYTNPSQDVTVPCPVPSTPPTPSPSTPPTPSPSCCHPR	gi|31615935	1589.57	N4H3F0S1G0	1146.7	5726.47	5	-3	18.1886	1.2071	O-linked glycosylation
14338	14339	55.4462	HYTNPSQDVTVPCPVPSTPPTPSPSTPPTPSPSCCHPR	gi|31615935	1751.62	N4H4F0S1G0	1179.31	5888.51	5	-4	18.1838	-1.6459	O-linked glycosylation
15833	15834	59.6393	HYTNPSQDVTVPCPVPSTPPTPSPSTPPTPSPSCCHPR	gi|31615935	2042.72	N4H4F0S2G0	1237.53	6179.6	5	-4	18.1827	-0.84766	O-linked glycosylation
17887	17888	65.4063	HYTNPSQDVTVPCPVPSTPPTPSPSTPPTPSPSCCHPR	gi|31615935	2171.76	N4H3F0S3G0	1578.67	6308.65	4	-3	17.2558	-0.64445	O-linked glycosylation
13233	13234	52.3495	HYTNPSQDVTVPCPVPSTPPTPSPSTPPTPSPSCCHPR	gi|31615935	1136.42	N4H2F0S0G0	1319.58	5273.31	4	-2	17.2382	-0.94295	O-linked glycosylation
15859	15860	59.7122	HYTNPSQDVTVPCPVPSTPPTPSPSTPPTPSPSCCHPR	gi|31615935	2042.72	N4H4F0S2G0	1546.41	6179.6	4	-3	17.2317	-0.87561	O-linked glycosylation
13311	13312	52.5678	HYTNPSQDVTVPCPVPSTPPTPSPSTPPTPSPSCCHPR	gi|31615935	1298.48	N4H3F0S0G0	1360.6	5435.36	4	-4	17.2301	-1.7122	O-linked glycosylation
12453	12454	50.162	HYTNPSQDVTVPCPVPSTPPTPSPSTPPTPSPSCCHPR	gi|31615935	1460.53	N4H4F0S0G0	1400.86	5597.42	4	-3	17.2286	-0.55159	O-linked glycosylation
15313	15314	58.1812	HYTNPSQDVTVPCPVPSTPPTPSPSTPPTPSPSCCHPR	gi|31615935	2042.72	N4H4F0S2G0	1546.41	6179.61	4	-3	17.2278	-0.24349	O-linked glycosylation
12804	12807	51.151	HYTNPSQDVTVPCPVPSTPPTPSPSTPPTPSPSCCHPR	gi|31615935	933.344	N3H2F0S0G0	1269.07	5070.23	4	-3	17.2236	0.14993	O-linked glycosylation
14494	14495	55.8853	HYTNPSQDVTVPCPVPSTPPTPSPSTPPTPSPSCCHPR	gi|31615935	1224.44	N3H2F0S1G0	1073.07	5361.34	5	0	17.1954	1.8911	O-linked glycosylation
12583	12586	50.5308	HYTNPSQDVTVPCPVPSTPPTPSPSTPPTPSPSCCHPR	gi|31615935	1339.5	N5H2F0S0G0	1096.69	5476.39	5	-3	17.1925	-0.88637	O-linked glycosylation
15287	15288	58.1085	HYTNPSQDVTVPCPVPSTPPTPSPSTPPTPSPSCCHPR	gi|31615935	2042.72	N4H4F0S2G0	1237.53	6179.61	5	-4	17.1733	-0.057516	O-linked glycosylation
14663	14664	56.3597	HYTNPSQDVTVPCPVPSTPPTPSPSTPPTPSPSCCHPR	gi|31615935	1224.44	N3H2F0S1G0	1341.84	5361.33	4	-3	16.2304	-0.80349	O-linked glycosylation
14390	14391	55.5928	HYTNPSQDVTVPCPVPSTPPTPSPSTPPTPSPSCCHPR	gi|31615935	1751.62	N4H4F0S1G0	1473.63	5888.5	4	-3	16.2303	-1.9654	O-linked glycosylation
11998	11999	48.8865	HYTNPSQDVTVPCPVPSTPPTPSPSTPPTPSPSCCHPR	gi|31615935	1704.63	N6H3F0S0G0	1461.89	5841.51	4	-3	16.2285	-1.8733	O-linked glycosylation
15430	15431	58.5085	HYTNPSQDVTVPCPVPSTPPTPSPSTPPTPSPSCCHPR	gi|31615935	2083.75	N5H3F0S2G0	1556.67	6220.63	4	-3	16.211	-0.98575	O-linked glycosylation
15248	15249	57.9993	HYTNPSQDVTVPCPVPSTPPTPSPSTPPTPSPSCCHPR	gi|31615935	2083.75	N5H3F0S2G0	1556.67	6220.64	4	-3	16.2082	0.66262	O-linked glycosylation
14208	14210	55.0832	HYTNPSQDVTVPCPVPSTPPTPSPSTPPTPSPSCCHPR	gi|31615935	1589.57	N4H3F0S1G0	955.253	5726.48	6	0	16.2022	3.0264	O-linked glycosylation
11686	11687	48.011	HYTNPSQDVTVPCPVPSTPPTPSPSTPPTPSPSCCHPR	gi|31615935	1825.66	N5H5F0S0G0	1193.92	5962.55	5	-3	16.1868	0.4222	O-linked glycosylation
17874	17875	65.3698	HYTNPSQDVTVPCPVPSTPPTPSPSTPPTPSPSCCHPR	gi|31615935	2171.76	N4H3F0S3G0	1263.14	6308.65	5	-3	16.1786	0.28235	O-linked glycosylation
15599	15600	58.9822	HYTNPSQDVTVPCPVPSTPPTPSPSTPPTPSPSCCHPR	gi|31615935	2042.72	N4H4F0S2G0	1031.28	6179.62	6	-3	16.1779	1.2537	O-linked glycosylation
14130	14140	54.8858	HYTNPSQDVTVPCPVPSTPPTPSPSTPPTPSPSCCHPR	gi|31615935	1606.59	N4H4F1S0G0	1149.5	5743.48	5	0	15.2497	0.44073	O-linked glycosylation
11673	11674	47.9742	HYTNPSQDVTVPCPVPSTPPTPSPSTPPTPSPSCCHPR	gi|31615935	1825.66	N5H5F0S0G0	1492.14	5962.55	4	-3	15.235	-0.90643	O-linked glycosylation
12947	12948	51.5475	HYTNPSQDVTVPCPVPSTPPTPSPSTPPTPSPSCCHPR	gi|31615935	1298.48	N4H3F0S0G0	1360.35	5435.35	4	-3	15.2255	-2.2628	O-linked glycosylation
12466	12471	50.2088	HYTNPSQDVTVPCPVPSTPPTPSPSTPPTPSPSCCHPR	gi|31615935	1095.4	N3H3F0S0G0	873.222	5232.29	6	-2	15.2243	0.44251	O-linked glycosylation
14611	14612	56.2135	HYTNPSQDVTVPCPVPSTPPTPSPSTPPTPSPSCCHPR	gi|31615935	1589.57	N4H3F0S1G0	1433.12	5726.45	4	-3	15.2146	-1.7538	O-linked glycosylation
13818	13823	53.9987	HYTNPSQDVTVPCPVPSTPPTPSPSTPPTPSPSCCHPR	gi|31615935	1751.62	N4H4F0S1G0	842.51	5888.51	7	-3	15.2116	-0.27193	O-linked glycosylation
14637	14640	56.2913	HYTNPSQDVTVPCPVPSTPPTPSPSTPPTPSPSCCHPR	gi|31615935	1589.57	N4H3F0S1G0	1146.9	5726.45	5	-4	15.2112	-1.4465	O-linked glycosylation
14156	14164	54.9535	HYTNPSQDVTVPCPVPSTPPTPSPSTPPTPSPSCCHPR	gi|31615935	1386.49	N3H3F0S1G0	921.572	5523.39	6	-1	15.2059	1.3688	O-linked glycosylation
12778	12780	51.0758	HYTNPSQDVTVPCPVPSTPPTPSPSTPPTPSPSCCHPR	gi|31615935	1339.5	N5H2F0S0G0	1096.88	5476.38	5	-4	15.1996	-2.6581	O-linked glycosylation
12557	12568	50.4793	HYTNPSQDVTVPCPVPSTPPTPSPSTPPTPSPSCCHPR	gi|31615935	1298.48	N4H3F0S0G0	777.773	5435.35	7	-3	15.1993	-2.2023	O-linked glycosylation
12271	12275	49.6583	HYTNPSQDVTVPCPVPSTPPTPSPSTPPTPSPSCCHPR	gi|31615935	1460.53	N4H4F0S0G0	800.925	5597.42	7	-3	15.1978	-0.62373	O-linked glycosylation
14832	14835	56.8387	HYTNPSQDVTVPCPVPSTPPTPSPSTPPTPSPSCCHPR	gi|31615935	1589.57	N4H3F0S1G0	1146.9	5726.44	5	-4	15.1976	-3.4716	O-linked glycosylation
12401	12404	50.0212	HYTNPSQDVTVPCPVPSTPPTPSPSTPPTPSPSCCHPR	gi|31615935	1460.53	N4H4F0S0G0	933.746	5597.44	6	0	15.1941	3.5101	O-linked glycosylation
15430	15434	58.5163	HYTNPSQDVTVPCPVPSTPPTPSPSTPPTPSPSCCHPR	gi|31615935	2042.72	N4H4F0S2G0	883.951	6179.61	7	-2	15.1886	-0.61535	O-linked glycosylation
14156	14158	54.938	HYTNPSQDVTVPCPVPSTPPTPSPSTPPTPSPSCCHPR	gi|31615935	1751.62	N4H4F0S1G0	1178.51	5888.53	5	0	15.1883	2.6646	O-linked glycosylation
12167	12168	49.3592	HYTNPSQDVTVPCPVPSTPPTPSPSTPPTPSPSCCHPR	gi|31615935	1501.56	N5H3F0S0G0	1128.5	5638.45	5	0	15.1848	1.0207	O-linked glycosylation
15781	15783	59.496	HYTNPSQDVTVPCPVPSTPPTPSPSTPPTPSPSCCHPR	gi|31615935	2042.72	N4H4F0S2G0	1030.78	6179.62	6	0	15.1717	1.0767	O-linked glycosylation
14663	14672	56.3807	HYTNPSQDVTVPCPVPSTPPTPSPSTPPTPSPSCCHPR	gi|31615935	1387.51	N3H3F2S0G0	1105.68	5524.38	5	0	14.2675	-3.9243	O-linked glycosylation
14754	14756	56.6175	HYTNPSQDVTVPCPVPSTPPTPSPSTPPTPSPSCCHPR	gi|31615935	1427.52	N4H2F0S1G0	1392.86	5564.41	4	-4	14.2526	-0.5532	O-linked glycosylation
16080	16081	60.3308	HYTNPSQDVTVPCPVPSTPPTPSPSTPPTPSPSCCHPR	gi|31615935	1677.59	N3H3F0S2G0	1455.13	5814.47	4	-3	14.2402	-1.4558	O-linked glycosylation
12856	12859	51.2972	HYTNPSQDVTVPCPVPSTPPTPSPSTPPTPSPSCCHPR	gi|31615935	1136.42	N4H2F0S0G0	1319.59	5273.32	4	-2	14.2397	0.35338	O-linked glycosylation
12999	13000	51.6933	HYTNPSQDVTVPCPVPSTPPTPSPSTPPTPSPSCCHPR	gi|31615935	1460.53	N4H4F0S0G0	1401.11	5597.4	4	-4	14.2358	-3.419	O-linked glycosylation
13129	13130	52.0577	HYTNPSQDVTVPCPVPSTPPTPSPSTPPTPSPSCCHPR	gi|31615935	1298.48	N4H3F0S0G0	1360.1	5435.36	4	-2	14.2343	-0.74724	O-linked glycosylation
14975	14976	57.2342	HYTNPSQDVTVPCPVPSTPPTPSPSTPPTPSPSCCHPR	gi|31615935	1589.57	N4H3F0S1G0	1433.37	5726.44	4	-4	14.2306	-3.9597	O-linked glycosylation
12609	12610	50.5987	HYTNPSQDVTVPCPVPSTPPTPSPSTPPTPSPSCCHPR	gi|31615935	1095.4	N3H3F0S0G0	1309.58	5232.29	4	-3	14.2289	1.066	O-linked glycosylation
12505	12506	50.3077	HYTNPSQDVTVPCPVPSTPPTPSPSTPPTPSPSCCHPR	gi|31615935	1501.56	N5H3F0S0G0	1411.12	5638.44	4	-3	14.2277	-1.628	O-linked glycosylation
12687	12689	50.8198	HYTNPSQDVTVPCPVPSTPPTPSPSTPPTPSPSCCHPR	gi|31615935	1501.56	N5H3F0S0G0	1411.37	5638.43	4	-4	14.2264	-3.0024	O-linked glycosylation
12817	12818	51.1827	HYTNPSQDVTVPCPVPSTPPTPSPSTPPTPSPSCCHPR	gi|31615935	1460.53	N4H4F0S0G0	1400.86	5597.41	4	-3	14.2226	-1.7729	O-linked glycosylation
14793	14794	56.7243	HYTNPSQDVTVPCPVPSTPPTPSPSTPPTPSPSCCHPR	gi|31615935	1589.57	N4H3F0S1G0	1433.37	5726.45	4	-4	14.2177	-1.5722	O-linked glycosylation
12869	12870	51.3285	HYTNPSQDVTVPCPVPSTPPTPSPSTPPTPSPSCCHPR	gi|31615935	1501.56	N5H3F0S0G0	1411.37	5638.42	4	-4	14.2165	-3.955	O-linked glycosylation
12661	12664	50.7495	HYTNPSQDVTVPCPVPSTPPTPSPSTPPTPSPSCCHPR	gi|31615935	1339.5	N5H2F0S0G0	1370.36	5476.39	4	-2	14.2153	0.10745	O-linked glycosylation
16470	16471	61.4288	HYTNPSQDVTVPCPVPSTPPTPSPSTPPTPSPSCCHPR	gi|31615935	1515.53	N3H2F0S2G0	1414.61	5652.41	4	-3	14.2111	-1.8315	O-linked glycosylation
15027	15028	57.3798	HYTNPSQDVTVPCPVPSTPPTPSPSTPPTPSPSCCHPR	gi|31615935	1589.57	N4H3F0S1G0	1146.9	5726.45	5	-4	14.2098	-2.6189	O-linked glycosylation
12804	12815	51.172	HYTNPSQDVTVPCPVPSTPPTPSPSTPPTPSPSCCHPR	gi|31615935	933.344	N3H2F0S0G0	1014.86	5070.26	5	0	14.2014	5.3346	O-linked glycosylation
13623	13634	53.4692	HYTNPSQDVTVPCPVPSTPPTPSPSTPPTPSPSCCHPR	gi|31615935	1751.62	N4H4F0S1G0	842.653	5888.51	7	-4	14.1996	-0.37522	O-linked glycosylation
15222	15226	57.9343	HYTNPSQDVTVPCPVPSTPPTPSPSTPPTPSPSCCHPR	gi|31615935	2042.72	N4H4F0S2G0	1030.78	6179.62	6	0	14.1985	1.5787	O-linked glycosylation
12934	12935	51.5112	HYTNPSQDVTVPCPVPSTPPTPSPSTPPTPSPSCCHPR	gi|31615935	1298.48	N4H3F0S0G0	1088.68	5435.36	5	-4	14.1913	-1.8942	O-linked glycosylation
15378	15381	58.3685	HYTNPSQDVTVPCPVPSTPPTPSPSTPPTPSPSCCHPR	gi|31615935	2083.75	N5H3F0S2G0	889.811	6220.62	7	-2	14.1896	-2.3069	O-linked glycosylation
12492	12495	50.2765	HYTNPSQDVTVPCPVPSTPPTPSPSTPPTPSPSCCHPR	gi|31615935	1458.51	N2H2F1S2G0	1120.89	5595.41	5	-5	14.1853	1.4672	O-linked glycosylation
11972	11974	48.8158	HYTNPSQDVTVPCPVPSTPPTPSPSTPPTPSPSCCHPR	gi|31615935	1704.63	N6H3F0S0G0	1169.51	5841.52	5	-2	14.1825	-0.69513	O-linked glycosylation
12869	12871	51.3312	HYTNPSQDVTVPCPVPSTPPTPSPSTPPTPSPSCCHPR	gi|31615935	1458.51	N2H2F1S2G0	1121.09	5595.4	5	-6	14.1811	-0.70312	O-linked glycosylation
13779	13785	53.8922	HYTNPSQDVTVPCPVPSTPPTPSPSTPPTPSPSCCHPR	gi|31615935	365.132	N1H1F0S0G0	1127.02	4502.04	4	-3	13.24	3.4613	O-linked glycosylation
15898	15908	59.845	HYTNPSQDVTVPCPVPSTPPTPSPSTPPTPSPSCCHPR	gi|31615935	1677.59	N3H3F0S2G0	831.934	5814.48	7	-3	13.2366	0.19626	O-linked glycosylation
14286	14288	55.3027	HYTNPSQDVTVPCPVPSTPPTPSPSTPPTPSPSCCHPR	gi|31615935	1386.49	N3H3F0S1G0	1382.1	5523.38	4	-2	13.2247	-1.2452	O-linked glycosylation
12479	12480	50.2347	HYTNPSQDVTVPCPVPSTPPTPSPSTPPTPSPSCCHPR	gi|31615935	1339.5	N5H2F0S0G0	1370.35	5476.39	4	-2	13.2157	-0.78416	O-linked glycosylation
12726	12728	50.9297	HYTNPSQDVTVPCPVPSTPPTPSPSTPPTPSPSCCHPR	gi|31615935	1298.48	N4H3F0S0G0	907.068	5435.36	6	-2	13.2097	-0.52727	O-linked glycosylation
11868	11870	48.5245	HYTNPSQDVTVPCPVPSTPPTPSPSTPPTPSPSCCHPR	gi|31615935	1825.66	N5H5F0S0G0	1193.92	5962.55	5	-3	13.2083	-0.60144	O-linked glycosylation
13493	13494	53.0787	HYTNPSQDVTVPCPVPSTPPTPSPSTPPTPSPSCCHPR	gi|31615935	1298.48	N4H3F0S0G0	1360.6	5435.36	4	-4	13.2056	-2.0715	O-linked glycosylation
13311	13314	52.573	HYTNPSQDVTVPCPVPSTPPTPSPSTPPTPSPSCCHPR	gi|31615935	1298.48	N4H3F0S0G0	1088.48	5435.36	5	-3	13.2033	-1.0074	O-linked glycosylation
12414	12426	50.081	HYTNPSQDVTVPCPVPSTPPTPSPSTPPTPSPSCCHPR	gi|31615935	1501.56	N5H3F0S0G0	806.643	5638.45	7	-2	13.2031	0.27008	O-linked glycosylation
14702	14703	56.4688	HYTNPSQDVTVPCPVPSTPPTPSPSTPPTPSPSCCHPR	gi|31615935	1751.62	N4H4F0S1G0	1179.31	5888.5	5	-4	13.1966	-2.6824	O-linked glycosylation
12856	12857	51.292	HYTNPSQDVTVPCPVPSTPPTPSPSTPPTPSPSCCHPR	gi|31615935	1339.5	N5H2F0S0G0	1370.61	5476.39	4	-3	13.1965	-0.32682	O-linked glycosylation
14299	14309	55.3598	HYTNPSQDVTVPCPVPSTPPTPSPSTPPTPSPSCCHPR	gi|31615935	1224.44	N3H2F0S1G0	1073.27	5361.32	5	-1	13.1895	-1.6263	O-linked glycosylation
13948	13950	54.3552	HYTNPSQDVTVPCPVPSTPPTPSPSTPPTPSPSCCHPR	gi|31615935	1751.62	N4H4F0S1G0	982.594	5888.52	6	-2	13.1881	0.34139	O-linked glycosylation
13571	13577	53.3103	HYTNPSQDVTVPCPVPSTPPTPSPSTPPTPSPSCCHPR	gi|31615935	1751.62	N4H4F0S1G0	982.928	5888.52	6	-4	13.1787	0.5494	O-linked glycosylation
13961	13966	54.3993	HYTNPSQDVTVPCPVPSTPPTPSPSTPPTPSPSCCHPR	gi|31615935	1386.49	N3H3F0S1G0	921.738	5523.38	6	-2	13.1703	-0.47626	O-linked glycosylation
17679	17681	64.8258	HYTNPSQDVTVPCPVPSTPPTPSPSTPPTPSPSCCHPR	gi|31615935	2171.76	N4H3F0S3G0	1262.94	6308.64	5	-2	13.1252	-2.1464	O-linked glycosylation
15040	15042	57.4187	HYTNPSQDVTVPCPVPSTPPTPSPSTPPTPSPSCCHPR	gi|31615935	1224.44	N3H2F0S1G0	1341.59	5361.31	4	-2	12.2513	-3.7297	O-linked glycosylation
11855	11856	48.4855	HYTNPSQDVTVPCPVPSTPPTPSPSTPPTPSPSCCHPR	gi|31615935	1825.66	N5H5F0S0G0	1492.14	5962.54	4	-3	12.2511	-1.1521	O-linked glycosylation
13909	13913	54.2508	HYTNPSQDVTVPCPVPSTPPTPSPSTPPTPSPSCCHPR	gi|31615935	1386.49	N3H3F0S1G0	1382.85	5523.36	4	-5	12.2503	-3.2442	O-linked glycosylation
13181	13183	52.2062	HYTNPSQDVTVPCPVPSTPPTPSPSTPPTPSPSCCHPR	gi|31615935	1460.53	N4H4F0S0G0	1401.11	5597.4	4	-4	12.2494	-3.5935	O-linked glycosylation
14754	14755	56.6148	HYTNPSQDVTVPCPVPSTPPTPSPSTPPTPSPSCCHPR	gi|31615935	1751.62	N4H4F0S1G0	1474.13	5888.5	4	-5	12.2424	-2.7732	O-linked glycosylation
12999	13002	51.6985	HYTNPSQDVTVPCPVPSTPPTPSPSTPPTPSPSCCHPR	gi|31615935	933.344	N3H2F0S0G0	1268.81	5070.23	4	-2	12.2358	-1.4034	O-linked glycosylation
15131	15133	57.6733	HYTNPSQDVTVPCPVPSTPPTPSPSTPPTPSPSCCHPR	gi|31615935	2042.72	N4H4F0S2G0	1546.41	6179.61	4	-3	12.2298	-0.3225	O-linked glycosylation
12128	12130	49.2523	HYTNPSQDVTVPCPVPSTPPTPSPSTPPTPSPSCCHPR	gi|31615935	1501.56	N5H3F0S0G0	1411.12	5638.45	4	-3	12.2295	0.19052	O-linked glycosylation
13194	13202	52.2583	HYTNPSQDVTVPCPVPSTPPTPSPSTPPTPSPSCCHPR	gi|31615935	933.344	N3H2F0S0G0	1269.06	5070.23	4	-3	12.224	-1.6798	O-linked glycosylation
14663	14668	56.3702	HYTNPSQDVTVPCPVPSTPPTPSPSTPPTPSPSCCHPR	gi|31615935	1386.49	N3H3F0S1G0	1382.6	5523.37	4	-4	12.2228	-2.1948	O-linked glycosylation
13116	13119	52.0265	HYTNPSQDVTVPCPVPSTPPTPSPSTPPTPSPSCCHPR	gi|31615935	1136.42	N4H2F0S0G0	1055.87	5273.31	5	-2	12.2042	-0.43606	O-linked glycosylation
16327	16330	61.0328	HYTNPSQDVTVPCPVPSTPPTPSPSTPPTPSPSCCHPR	gi|31615935	1515.53	N3H2F0S2G0	1131.89	5652.42	5	-3	12.2	-0.1924	O-linked glycosylation
14338	14343	55.4567	HYTNPSQDVTVPCPVPSTPPTPSPSTPPTPSPSCCHPR	gi|31615935	1751.62	N4H4F0S1G0	982.761	5888.51	6	-3	12.1955	-0.083225	O-linked glycosylation
15703	15709	59.2878	HYTNPSQDVTVPCPVPSTPPTPSPSTPPTPSPSCCHPR	gi|31615935	1677.59	N3H3F0S2G0	1164.3	5814.48	5	-3	12.1951	-0.21931	O-linked glycosylation
15235	15246	57.989	HYTNPSQDVTVPCPVPSTPPTPSPSTPPTPSPSCCHPR	gi|31615935	2042.72	N4H4F0S2G0	884.095	6179.61	7	-3	12.1927	-0.43723	O-linked glycosylation
14013	14022	54.5555	HYTNPSQDVTVPCPVPSTPPTPSPSTPPTPSPSCCHPR	gi|31615935	1589.57	N4H3F0S1G0	955.751	5726.46	6	-3	12.1902	-1.0334	O-linked glycosylation
16093	16094	60.3678	HYTNPSQDVTVPCPVPSTPPTPSPSTPPTPSPSCCHPR	gi|31615935	1677.59	N3H3F0S2G0	1164.3	5814.48	5	-3	12.189	-0.21931	O-linked glycosylation
14052	14059	54.6598	HYTNPSQDVTVPCPVPSTPPTPSPSTPPTPSPSCCHPR	gi|31615935	1589.57	N4H3F0S1G0	819.503	5726.46	7	-4	12.1865	-0.0013335	O-linked glycosylation
15092	15094	57.5643	HYTNPSQDVTVPCPVPSTPPTPSPSTPPTPSPSCCHPR	gi|31615935	2042.72	N4H4F0S2G0	1237.33	6179.62	5	-3	12.1735	2.0064	O-linked glycosylation
14390	14394	55.6007	HYTNPSQDVTVPCPVPSTPPTPSPSTPPTPSPSCCHPR	gi|31615935	1589.57	N4H3F0S1G0	955.582	5726.45	6	-2	12.1613	-2.5153	O-linked glycosylation
12414	12418	50.0602	HYTNPSQDVTVPCPVPSTPPTPSPSTPPTPSPSCCHPR	gi|31615935	1095.4	N3H3F0S0G0	1309.58	5232.28	4	-3	11.2452	-1.1737	O-linked glycosylation
14455	14459	55.7832	HYTNPSQDVTVPCPVPSTPPTPSPSTPPTPSPSCCHPR	gi|31615935	203.079	N1H0F0S0G0	1086.25	4339.98	4	-2	11.2444	1.6785	O-linked glycosylation
14390	14392	55.5955	HYTNPSQDVTVPCPVPSTPPTPSPSTPPTPSPSCCHPR	gi|31615935	1427.52	N4H2F0S1G0	1392.61	5564.4	4	-3	11.2336	-1.5298	O-linked glycosylation
14949	14952	57.1667	HYTNPSQDVTVPCPVPSTPPTPSPSTPPTPSPSCCHPR	gi|31615935	1427.52	N4H2F0S1G0	1392.61	5564.4	4	-3	11.2199	-1.4421	O-linked glycosylation
13415	13417	52.8625	HYTNPSQDVTVPCPVPSTPPTPSPSTPPTPSPSCCHPR	gi|31615935	1136.42	N4H2F0S0G0	1319.83	5273.31	4	-3	11.2178	-1.5791	O-linked glycosylation
13610	13619	53.4277	HYTNPSQDVTVPCPVPSTPPTPSPSTPPTPSPSCCHPR	gi|31615935	730.264	N2H2F0S0G0	974.838	4867.15	5	-3	11.2156	-1.641	O-linked glycosylation
13363	13366	52.719	HYTNPSQDVTVPCPVPSTPPTPSPSTPPTPSPSCCHPR	gi|31615935	1460.53	N4H4F0S0G0	1401.11	5597.4	4	-4	11.2136	-3.419	O-linked glycosylation
14676	14678	56.3987	HYTNPSQDVTVPCPVPSTPPTPSPSTPPTPSPSCCHPR	gi|31615935	1224.44	N3H2F0S1G0	1073.67	5361.33	5	-3	11.2127	0.10492	O-linked glycosylation
14715	14717	56.508	HYTNPSQDVTVPCPVPSTPPTPSPSTPPTPSPSCCHPR	gi|31615935	2042.72	N4H4F0S2G0	1237.53	6179.61	5	-4	11.2002	-0.15628	O-linked glycosylation
13116	13120	52.0292	HYTNPSQDVTVPCPVPSTPPTPSPSTPPTPSPSCCHPR	gi|31615935	1298.48	N4H3F0S0G0	1087.87	5435.34	5	0	11.1979	-5.0848	O-linked glycosylation
14299	14300	55.3363	HYTNPSQDVTVPCPVPSTPPTPSPSTPPTPSPSCCHPR	gi|31615935	1386.49	N3H3F0S1G0	1106.08	5523.37	5	-3	11.1975	-1.5897	O-linked glycosylation
11946	11954	48.7585	HYTNPSQDVTVPCPVPSTPPTPSPSTPPTPSPSCCHPR	gi|31615935	1704.63	N6H3F0S0G0	835.649	5841.49	7	-2	11.1963	-6.676	O-linked glycosylation
14949	14956	57.177	HYTNPSQDVTVPCPVPSTPPTPSPSTPPTPSPSCCHPR	gi|31615935	1427.52	N4H2F0S1G0	1114.29	5564.4	5	-3	11.1956	-2.3438	O-linked glycosylation
14897	14900	57.021	HYTNPSQDVTVPCPVPSTPPTPSPSTPPTPSPSCCHPR	gi|31615935	2083.75	N5H3F0S2G0	1245.74	6220.65	5	-4	11.1955	2.2014	O-linked glycosylation
15638	15643	59.1028	HYTNPSQDVTVPCPVPSTPPTPSPSTPPTPSPSCCHPR	gi|31615935	2042.72	N4H4F0S2G0	884.095	6179.61	7	-3	11.187	-0.57551	O-linked glycosylation
13064	13069	51.886	HYTNPSQDVTVPCPVPSTPPTPSPSTPPTPSPSCCHPR	gi|31615935	1460.53	N4H4F0S0G0	1120.89	5597.4	5	-3	11.1857	-2.5384	O-linked glycosylation
15781	15784	59.4985	HYTNPSQDVTVPCPVPSTPPTPSPSTPPTPSPSCCHPR	gi|31615935	1677.59	N3H3F0S2G0	970.586	5814.46	6	-4	11.1781	-2.541	O-linked glycosylation
12206	12211	49.479	HYTNPSQDVTVPCPVPSTPPTPSPSTPPTPSPSCCHPR	gi|31615935	1460.53	N4H4F0S0G0	934.078	5597.42	6	-2	11.1762	0.45765	O-linked glycosylation
13168	13172	52.1745	HYTNPSQDVTVPCPVPSTPPTPSPSTPPTPSPSCCHPR	gi|31615935	1095.4	N3H3F0S0G0	1309.33	5232.28	4	-2	10.2591	-1.3725	O-linked glycosylation
[truncated: 416 more rows]

## Sheet: PNGaseF_MAX
PNGase F_MAX: glycopeptides of human serum were treated with PNGase F, enriched by Oasis MAX Cartridge and analyzed by LC-MS/MS. GPQuest was used to identify the intact glycopeptides.
[truncated: 453 more rows]
